# 1 Phosphorylation-dependent sub-functionalization of 2 the calcium-dependent protein kinase CPK28

3  
4  
5  
6  
7  
8  
9

Melissa Bredow<sup>1,#</sup>, Kyle W. Bender<sup>2,#,a</sup>, Alexandra Johnson Dingee<sup>1,b</sup>, Danalyn R. Holmes<sup>1,c</sup>, Alysha Thomson<sup>1,d</sup>, Danielle Ciren<sup>1,e</sup>, Cailun A. S. Tanney<sup>1,f</sup>, Katherine E. Dunning<sup>1,3</sup>, Marco Trujillo<sup>3</sup>, Steven C. Huber<sup>2</sup>, and Jacqueline Monaghan<sup>1,\*</sup>

10 <sup>1</sup> Department of Biology, Queen's University, Kingston, Canada  
11 <sup>2</sup> Department of Plant Biology, School of Integrative Biology, University of Illinois-  
12 Urbana-Champaign, Urbana-Champaign, United States of America  
13 <sup>3</sup> Department of Cell Biology, University of Freiburg, Freiburg, Germany

14  
15 # These authors contributed equally to this work  
16 \* Corresponding author: [jacqueline.monaghan@queensu.ca](mailto:jacqueline.monaghan@queensu.ca)

17  
18  
19 <sup>a</sup> Current address: University of Zurich, Department of Plant and Microbial Biology,  
20 Zurich, Switzerland  
21 <sup>b</sup> Current address: Faculty of Law, Western University, London, Canada  
22 <sup>c</sup> Current address: Center for Plant Molecular Biology, University of Tuebingen,  
23 Tuebingen, Germany  
24 <sup>d</sup> Current address: Faculty of Medicine, McMaster University, Hamilton, Canada  
25 <sup>e</sup> Current address: Cold Spring Harbor Laboratory, Cold Spring Harbor, United States of  
26 America  
27 <sup>f</sup> Current address: Department of Plant Science, McGill University, Montreal, Canada

28  
29  
30 **Keywords:** calcium-dependent protein kinases, calcium-dependent protein kinase 28,  
31 botrytis-induced kinase 1, phosphorylation, immune signaling, stem elongation,  
32 biochemical mechanism

33  
34  
35  
36

## 37 **ABSTRACT**

38

39 Calcium ( $\text{Ca}^{2+}$ )-dependent protein kinases (CDPKs or CPKs) are a unique family of  
40  $\text{Ca}^{2+}$ -sensor/kinase-effector proteins with diverse functions in plants. In *Arabidopsis*  
41 *thaliana*, CPK28 contributes to immune homeostasis by promoting degradation of the  
42 key immune signaling receptor-like cytoplasmic kinase BOTRYTIS-INDUCED KINASE  
43 1 (BIK1), and additionally functions in vegetative-to-reproductive stage transition. How  
44 CPK28 controls these seemingly disparate pathways is unknown. Here, we identify a  
45 single phosphorylation site in the kinase domain of CPK28 (Ser318) that is differentially  
46 required for its function in immune homeostasis and stem elongation. We show that  
47 CPK28 undergoes intra- and inter-molecular auto-phosphorylation on Ser318 and can  
48 additionally be trans-phosphorylated on this residue by BIK1. Analysis of several other  
49 phosphorylation sites demonstrates that Ser318 phosphorylation is uniquely required to  
50 prime CPK28 for  $\text{Ca}^{2+}$  activation at physiological concentrations of  $\text{Ca}^{2+}$ , possibly  
51 through stabilization of the  $\text{Ca}^{2+}$ -bound active state as indicated by intrinsic  
52 fluorescence experiments. Together, our data indicate that phosphorylation of Ser318 is  
53 required for the activation of CPK28 at low intracellular [ $\text{Ca}^{2+}$ ] to prevent initiation of an  
54 immune response in the absence of infection. By comparison, phosphorylation of  
55 Ser318 is not required for stem-elongation, indicating pathway specific requirements for  
56 phosphorylation-based  $\text{Ca}^{2+}$ -sensitivity priming. We additionally provide evidence for a  
57 conserved function for Ser318 phosphorylation in related group IV CDPKs which holds  
58 promise for biotechnological applications by generating CDPK alleles that enhance  
59 resistance to microbial pathogens without consequences to yield.

## 60 INTRODUCTION

61  
62 Protein kinases represent one of the largest eukaryotic protein superfamilies. While  
63 roughly 500 protein kinases have been identified in humans (1), the genomes of  
64 *Arabidopsis thaliana* (hereafter, *Arabidopsis*) (2) and *Oryza sativa* (3) encode more than  
65 1000 and 1500 protein kinases, respectively, including several families unique to plants.  
66 Among these protein kinases are the receptor-like kinases (RLKs), receptor-like  
67 cytoplasmic kinases (RLCKs), and calcium-dependent protein kinases (CDPKs or  
68 CPKs) that have emerged as key regulators of plant immunity (4–6). Despite  
69 encompassing only 2% of most eukaryotic genomes, protein kinases phosphorylate  
70 more than 40% of cellular proteins (7, 8), reflecting their diverse roles in coordinating  
71 intracellular signaling events. Reversible phosphorylation of serine (Ser), threonine  
72 (Thr), and tyrosine (Tyr) residues can serve an array of functions including changes in  
73 protein conformation and activation state (9, 10), protein stability and degradation (11,  
74 12), subcellular localization (13–15), and interaction with protein substrates (16–18).

75 Calcium ( $\text{Ca}^{2+}$ ) is a ubiquitous secondary messenger that acts cooperatively with  
76 protein phosphorylation to propagate intracellular signals. Spatial and temporal changes  
77 in intracellular  $\text{Ca}^{2+}$  levels occur in response to environmental and developmental cues  
78 (19–23). In plants,  $\text{Ca}^{2+}$  transients are decoded by four major groups of calcium sensor  
79 proteins (CSPs), which possess one or more  $\text{Ca}^{2+}$ -binding EF-hand motifs (24, 25):  
80 calmodulins (CaM), CaM-like proteins (CMLs), calcineurin B-like proteins (CBLs),  
81 CDPKs, and  $\text{Ca}^{2+}$  and  $\text{Ca}^{2+}$ /CaM-dependent protein kinases (CCaMKs).

82           At the intersection of phosphorylation cascades and Ca<sup>2+</sup> signalling are CDPKs,  
83 a unique family of Ca<sup>2+</sup>-sensor/kinase-effector proteins. CDPKs have been identified in  
84 all land plants, green algae, as well as certain protozoan ciliates and apicomplexan  
85 parasites (26, 27). CDPKs have a conserved domain architecture, consisting of a  
86 canonical Ser/Thr protein kinase domain and an EF-hand containing Ca<sup>2+</sup>-binding CaM-  
87 like domain, linked together by an autoinhibitory junction (AIJ) and flanked by variable  
88 regions on both the amino (N) and carboxyl (C) termini (28, 29). As their name implies,  
89 most CDPKs require Ca<sup>2+</sup> for their activation (30). Upon Ca<sup>2+</sup> binding to all EF-hands in  
90 the CaM-like domain, a dramatic conformational change occurs, freeing the AIJ from the  
91 catalytic site of the kinase, rendering the enzyme active (31–33). CDPKs vary in their  
92 sensitivity to Ca<sup>2+</sup> (30), presumably allowing proteins to perceive distinct stimuli through  
93 differences in Ca<sup>2+</sup>-binding affinity. For example, *Arabidopsis* CPK4 displays half  
94 maximal kinase activity in the presence of ~ 3 μM of free Ca<sup>2+</sup> (30) while CPK5 only  
95 requires ~100 nM (34). Importantly, CDPKs are signaling hubs with documented roles in  
96 multiple distinct pathways (4, 24, 35–37) and are therefore likely regulated beyond Ca<sup>2+</sup>  
97 activation.

98           Sub-functionationization is at least partially mediated by protein localization and  
99 interaction with pathway-specific binding partners, as is well-documented for  
100 *Arabidopsis* CPK3 which functions in response to biotic and abiotic stimuli in distinct  
101 cellular compartments (38). Recent attention has been drawn to site-specific  
102 phosphorylation as a way to regulate the activity of multifunctional kinases. For  
103 example, phosphorylation sites on the RLK BRASSINOSTEROID INSENSITIVE 1-

104 ASSOCIATED KINASE 1 (BAK1) are differentially required for its function as a co-  
105 receptor with a subset of leucine-rich repeat (LRR)-RLKs (39). Phosphoproteomic  
106 analyses indicate that CDPKs are differentially phosphorylated following exposure to  
107 distinct stimuli (40–47); however, the biochemical mechanisms by which site-specific  
108 phosphorylation regulates multifunctional CDPKs is still poorly understood.

109 Arabidopsis CPK28 is a plasma membrane-localized protein kinase with dual  
110 roles in plant immune homeostasis (48–50) and phytohormone-mediated reproductive  
111 growth (51, 52). In vegetative plants, CPK28 serves as a negative regulator of immune  
112 signal amplitude by phosphorylating and activating two PLANT U-BOX type E3 ubiquitin  
113 ligases, PUB25 and PUB26, which target the key immune RLCK BOTRYTIS-INDUCED  
114 KINASE 1 (BIK1) for proteasomal degradation (49). Owing to elevated levels of BIK1,  
115 CPK28 null plants (*cpk28-1*) have heightened immune responses and enhanced  
116 resistance to the bacterial pathogen *Pseudomonas syringae* pv. *tomato* DC3000 (*Pto*  
117 DC3000) (50). Upon transition to the reproductive stage, *cpk28-1* plants additionally  
118 present shorter leaf petioles, enhanced anthocyanin production, and a reduction in stem  
119 elongation (51, 52). The molecular basis for developmental phenotypes in the *cpk28-1*  
120 knockout mutant, beyond hormonal imbalance (51, 52), are comparatively unknown.

121 Our recent work demonstrated that autophosphorylation status dictates Ca<sup>2+</sup>  
122 sensitivity of CPK28 peptide kinase activity *in vitro* (53). While dephosphorylated CPK28  
123 is stimulated by the addition of 100 μM CaCl<sub>2</sub> compared to untreated protein,  
124 hyperphosphorylated CPK28 displayed similar levels of activity at basal Ca<sup>2+</sup>  
125 concentrations (53). These results highlight the interesting possibility that

126 phosphorylation status may control the activation of multifunctional kinases in distinct  
127 pathways by allowing CDPKs to respond to stimuli-specific  $\text{Ca}^{2+}$  signatures.

128 In the present study, we identify a single autophosphorylation site, Ser318, that  
129 decouples the activity of CPK28 in immune signaling from its role in reproductive  
130 growth. We show that expression of a non-phosphorylatable Ser-to-Ala variant  
131 (CPK28<sup>S318A</sup>) is unable to complement the immune phenotypes of *cpk28-1* null mutants  
132 but is able to complement defects in stem growth. Further, we uncover a functional role  
133 for phosphorylation of Ser318 in priming CPK28 for activation at low free  $[\text{Ca}^{2+}]$ .  
134 Together, we demonstrate that site-specific phosphorylation can direct the activity of a  
135 multifunctional kinase in distinct pathways and provide evidence for a conserved  
136 mechanism in orthologous group IV CDPKs.

137

138

## 139 RESULTS

140

### 141 Phosphorylation on Ser318 is required for CPK28-mediated immune homeostasis

142 CPK28 is phosphorylated on multiple sites *in vitro* and *in vivo* (51, 53–55). To determine  
143 whether the function of CPK28 in reproductive stage transition and immunity is  
144 bifurcated by site-specific phosphorylation, we generated phospho-ablative (Ser-to-Ala)  
145 mutations in three known *in vivo* auto-phosphorylation sites conserved in CPK28  
146 orthologs across land plants (Fig S1): Ser228, Ser318, and Ser495 (51) (Fig 1A). When  
147 driven by the cauliflower mosaic virus (CaMV) 35S promoter, CPK28<sup>S228A</sup>, CPK28<sup>S318A</sup>

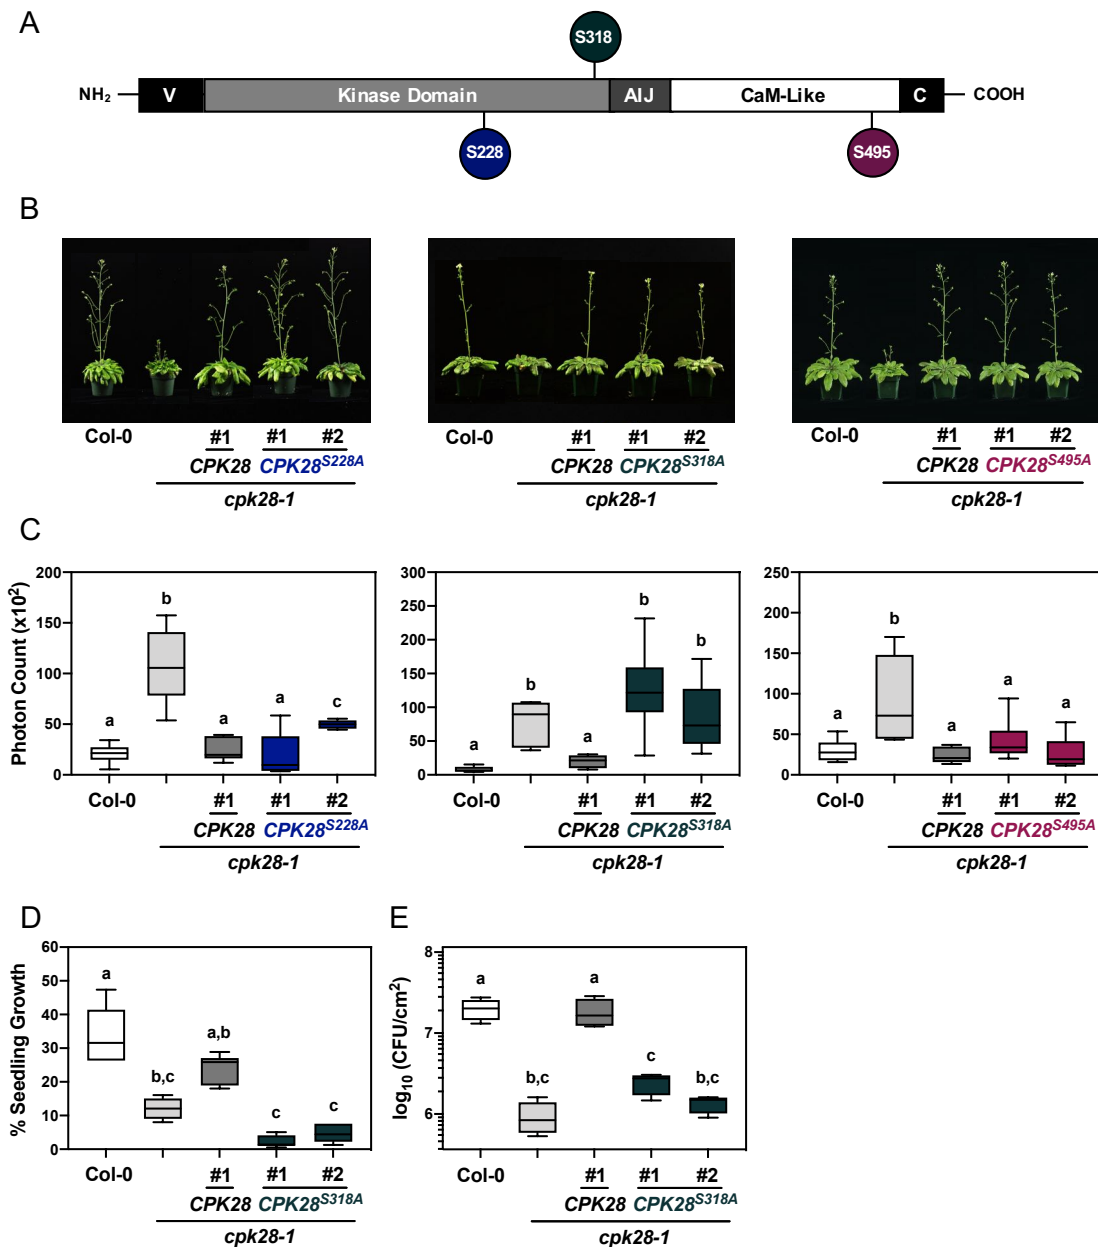

**Figure 1. Ser318 phosphorylation differentially regulates CPK28 function in immune homeostasis.**

(A) Domain structure of CPK28 and position of tested autophosphorylation sites. V= amino-terminal variable domain; AIJ= autoinhibitory junction; C= carboxyl-terminal variable domain. (B) Stem elongation of six-week-old *Arabidopsis* plants and (C) AtPep1 (500 nM) triggered oxidative burst in 5-week-old plants (n=6) in the indicated genotypes. Data are presented as boxplots indicating first and third quartiles, split by a median line. Whiskers represent maximum and minimum values. (D) Seedling growth inhibition of Col-0, *cpk28-1*, *cpk28-1/pCPK28:CPK28-FLAG*, and *cpk28-1/pCPK28:CPK28<sup>S318A</sup>-FLAG* lines (n=6) resulting from continual growth in AtPep1 (500 nM) for 12 days. Values are normalized to untreated seedlings and presented as boxplots indicating first and third quartiles, split by a median line. Whiskers represent maximum and minimum values. (E) Growth of virulent *Pseudomonas syringae* pv. *tomato* (DC3000) in Col-0, *cpk28-1*, *cpk28-1/pCPK28:CPK28-FLAG*, and *cpk28-1/pCPK28:CPK28<sup>S318A</sup>-FLAG* lines (n=4). Samples were collected 3 days post infection and serially diluted. Values are presented as log transformed colony forming units (CFU) per cm<sup>2</sup> and displayed as boxplots indicating first and third quartiles, split by a median line. Whiskers represent maximum and minimum values. At least three independent biological replicates were conducted for all experiments with similar results. Statistically different groups (p<0.005) are indicated with lowercase letters, as determined by ANOVA analysis followed by Tukey's posthoc test.

148 and CPK28<sup>S495A</sup> functionally complement the stem elongation phenotype observed in  
149 *cpk28-1* (51); however, it is unknown if these phosphosites regulate CPK28 function in  
150 immune homeostasis. To mitigate the possible effects of ectopic overexpression, we  
151 chose to stably express CPK28 mutants under the control of the native *pCPK28*  
152 promoter in the *cpk28-1* background and assessed functional complementation of  
153 defects in both stem elongation and immune signaling. Interestingly, we found that while  
154 all three mutations were able to complement the stem elongation phenotype of *cpk28-1*  
155 (Fig 1B), only CPK28<sup>S228A</sup> and CPK28<sup>S495A</sup> complemented the enhanced oxidative burst  
156 in *cpk28-1* following treatment with the endogenous immune elicitor peptide AtPep1 (Fig  
157 1C). In addition, *cpk28-1/pCPK28:CPK28<sup>S318A</sup>-FLAG* lines did not complement *cpk28-1*  
158 in oxidative burst assays following treatment with the bacterial elicitor peptide elf18 (Fig  
159 S2), remained hyper-responsive to AtPep1 in seedling growth inhibition assays (Fig  
160 1D), and more resistant than Col-0 to infection with the virulent bacterial pathogen *Pto*  
161 DC3000 (Fig 1E). Together, these results suggest that phosphorylation of Ser318 is  
162 uniquely required for CPK28 function in immune signaling.

163 Confocal imaging confirmed that CPK28<sup>S318A</sup>-YFP localizes to the plasma  
164 membrane in Arabidopsis stably expressing *35S:CPK28<sup>S318A</sup>-YFP* (Fig S3A),  
165 suggesting that phosphorylation of Ser318 does not affect the subcellular localization of  
166 CPK28. Catalytically inactive CPK28<sup>D188A</sup>-YFP was also observed at the plasma  
167 membrane (Fig S3A), indicating that CPK28 autophosphorylation is not required for  
168 appropriate localization. Furthermore, ablation of Ser318 phosphorylation did not  
169 compromise catalytic activity toward biological substrates PUB25 and PUB26 in *in vitro*



170 kinase assays (Fig S3B), leading us to conclude that Ser318 phosphorylation does not  
171 regulate the function of CPK28 in immunity through altered subcellular localization or  
172 substrate specificity.

173

#### 174 **CPK28-Ser318 undergoes intra- and inter-molecular autophosphorylation**

175 Most protein kinases autophosphorylate *in vitro* (56). CPK28 peptides containing a  
176 phosphorylated Ser318 have been observed in mass spectra from several studies (51,  
177 53–55). We validated that Ser318 is a Ca<sup>2+</sup>-dependent autophosphorylation site by  
178 conducting autophosphorylation assays with increasing levels of CaCl<sub>2</sub> (Fig 2A) and  
179 probing with a phosphorylation and site-specific antibody raised against phosphorylated  
180 Ser318 (Fig S4). We also used the pIMAGO phospho-protein detection reagent to  
181 observe total autophosphorylation levels of CPK28. To determine if CPK28  
182 autophosphorylates Ser318 *in cis* or *in trans*, we additionally conducted *in vitro* kinase  
183 assays using recombinantly produced MBP-His<sub>6</sub>-CPK28<sup>D188A</sup> as a substrate for His<sub>6</sub>-  
184 CPK28 (Fig 2B). His<sub>6</sub>-CPK28 could trans-phosphorylate MBP-His<sub>6</sub>-CPK28<sup>D188A</sup>,  
185 indicating that Ser318 autophosphorylation can occur in both *cis* and *trans* (Fig 2B).  
186 Importantly, these results indicate that CPK28 autophosphorylation, including on  
187 Ser318, can occur at levels of free Ca<sup>2+</sup> expected to occur under resting conditions *in*  
188 *vivo*.

189

190

191

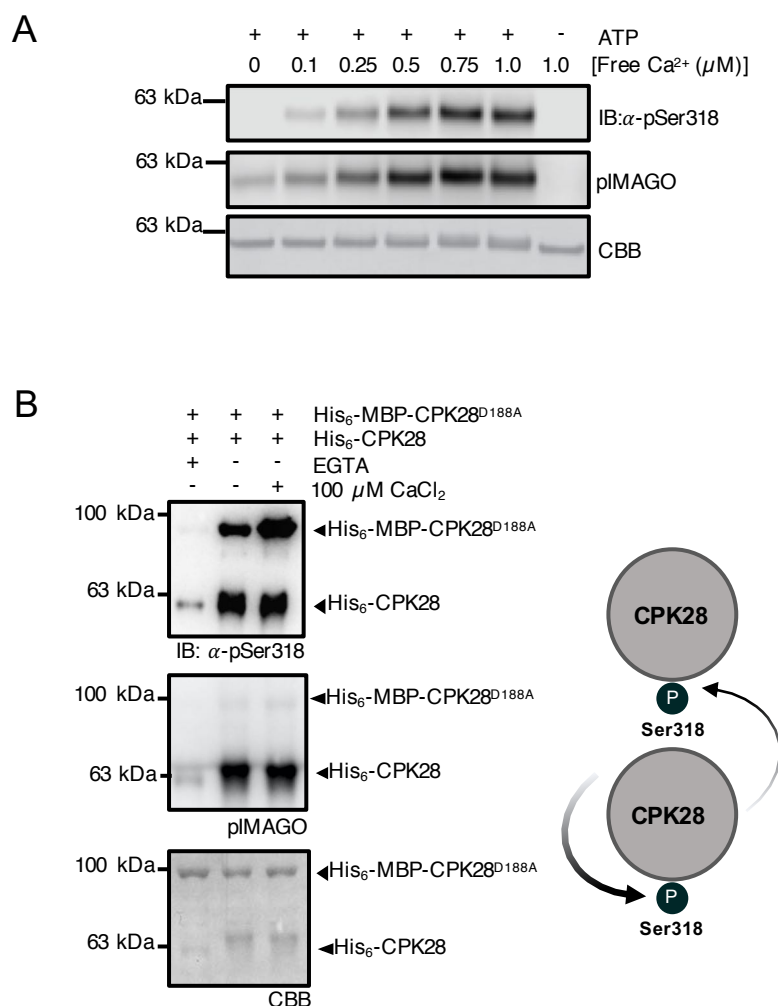

**Figure 2. CPK28 undergoes intra- and inter-molecular autophosphorylation at Ser318.** (A) His<sub>6</sub>-CPK28 autophosphorylation under increasing Ca<sup>2+</sup> concentrations. (B) *In vitro* kinase assays using recombinant His<sub>6</sub>-CPK28, His<sub>6</sub>-CPK28<sup>S318A</sup>, or His<sub>6</sub>-CPK28<sup>D188A</sup> and His<sub>6</sub>-MBP-CPK28<sup>D188A</sup>. Blots were probed with pIMAGO for the detection of phosphoproteins or α-pSer318 (1:5,000) antibody. Nylons were stained with Coomassie brilliant blue (CBB) to assess protein loading. Experiments were conducted three times with similar results.

## 192 **BIK1 can phosphorylate CPK28 on Ser318**

193 CPK28 is a highly active kinase even at basal cellular levels of Ca<sup>2+</sup> (49, 53). Increasing  
194 [Ca<sup>2+</sup>], either by adding CaCl<sub>2</sub> to *in vitro* kinase assays (53), or via immune treatment *in*  
195 *vivo* (49), increases overall phosphorylation on CPK28, including on Ser318 (Fig 2A).  
196 Although CPK28 can autophosphorylate on Ser318, it is possible that this site is  
197 phosphorylated by additional protein kinases. BIK1 is a critical convergent substrate of  
198 multiple immune receptors whose activity and abundance is tightly regulated by layers  
199 of dynamic post-translational modifications including phosphorylation/dephosphorylation  
200 (57–61) and mono- (62) and poly-ubiquitination (49, 50, 63). CPK28 phosphorylates  
201 both BIK1 (50) and the E3 ubiquitin ligases PUB25 and PUB26 (49). A recent study  
202 demonstrated reciprocal phosphorylation between the rice orthologs of CPK28 and  
203 BIK1, OsCPK4 and OsRLCK176 (64), leading us to hypothesize that a similar  
204 mechanism may exist in Arabidopsis. To test if CPK28 is a substrate of BIK1, we  
205 conducted *in vitro* kinase assays using recombinantly produced GST-BIK1 and  
206 catalytically inactive His<sub>6</sub>-CPK28<sup>D188A</sup>. Phospho-tag gel stain for the detection of  
207 phosphorylated proteins indicated that BIK1 is indeed able to phosphorylate CPK28 *in*  
208 *vitro* (Fig 3A). Next, we tested if BIK1 can phosphorylate Ser318 by conducting *in vitro*  
209 kinase assays between GST-BIK1 and His<sub>6</sub>-CPK28<sup>D188A/S318A</sup> compared to His<sub>6</sub>-  
210 CPK28<sup>D188A</sup>. We observed comparably less phosphorylation when CPK28<sup>D188A/S318A</sup> was  
211 used as a substrate (Fig 3A), suggesting that Ser318 can be phosphorylated by BIK1.  
212 Furthermore, immunoblot analysis using anti-pSer318 confirmed that BIK1 is capable of  
213 phosphorylating Ser318 *in vitro* (Fig 3B). As we still observed some level of

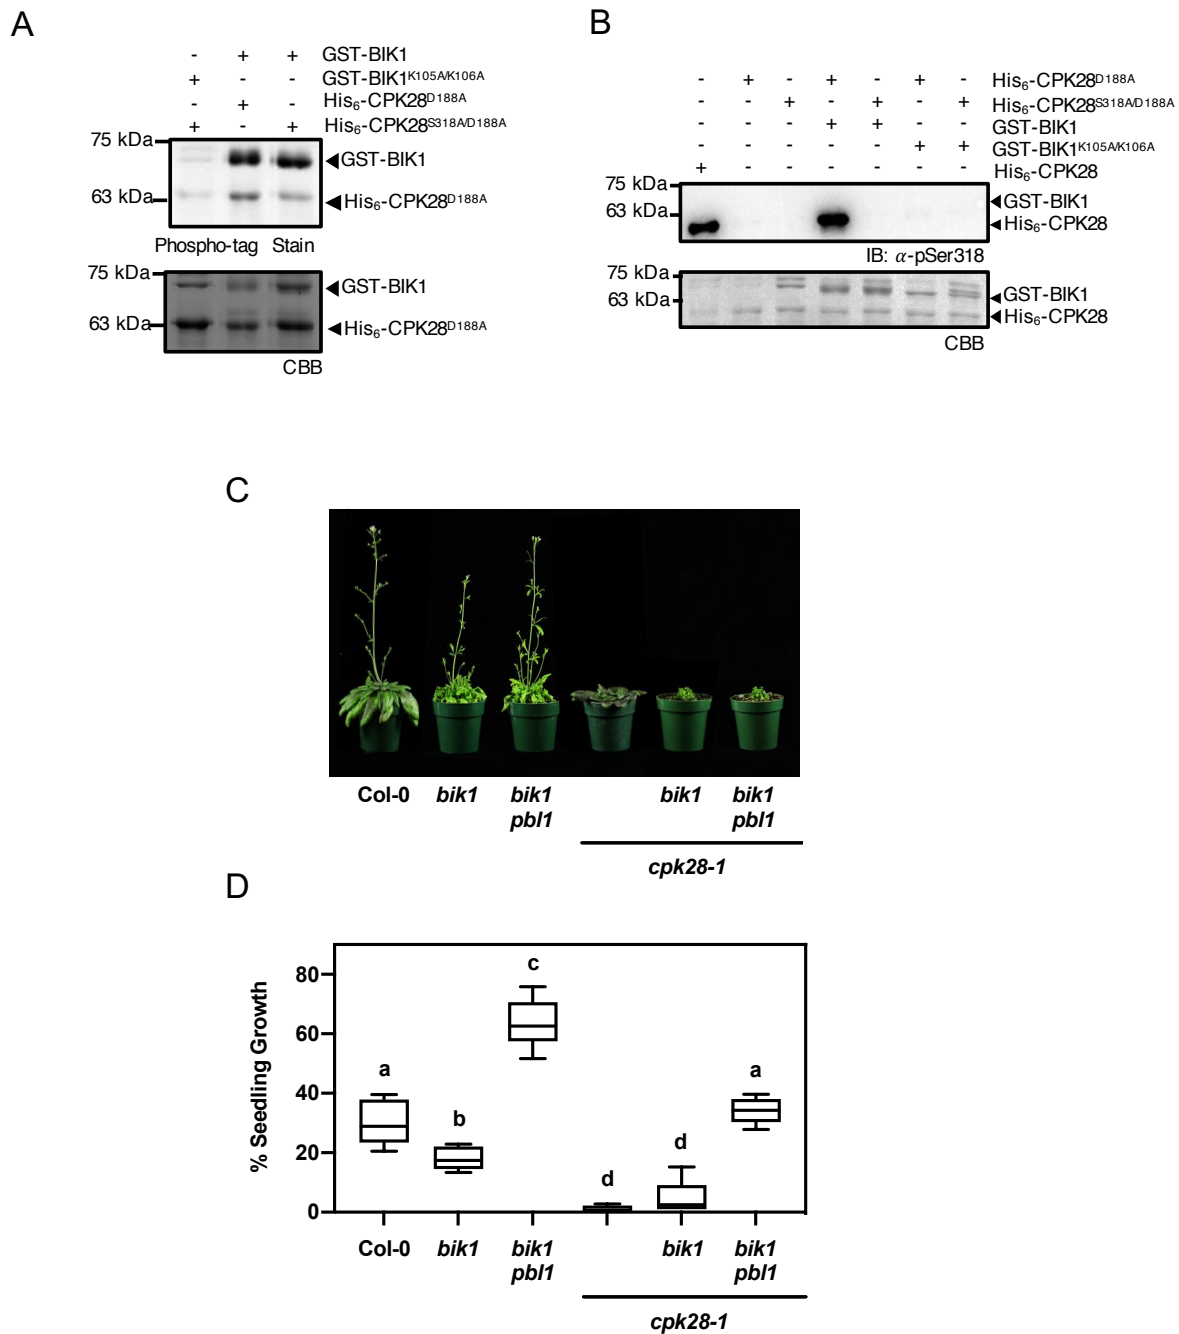

**Figure 3. BIK1 transphosphorylates CPK28 at Ser318 and is required for CPK28-dependent immune signaling.** (A) Phospho-tag gel stain and (B) Western blot analysis ( $\alpha$ -pSer318) of *in vitro* kinase assay using recombinant GST-BIK1 or GST-BIK1<sup>K105A/K106A</sup> and His<sub>6</sub>-CPK28<sup>D188A</sup> or His<sub>6</sub>-CPK28<sup>S318AD188A</sup>. In order to visualize both Ser318 autophosphorylation and GST-BIK1 transphosphorylation, 500 ng of His<sub>6</sub>-CPK28 and 2  $\mu$ g of His<sub>6</sub>-CPK28<sup>D188A</sup> were loaded for auto- and trans-phosphorylation reactions, respectively. Gels and nylons were stained with Coomassie Brilliant Blue (CBB) to assess protein loading. (C) Stem elongation of six week old plants and (D) seedling growth following continual treatment with 500 nM AtPep1 for 12 days (n=6). Values were compared to plants grown without AtPep1 and presented as boxplots indicating first and third quartiles, median values, and whiskers representing maximum and minimum values. Statistically different (p<0.005) values are denoted by lowercase letters according to an ANOVA analysis followed by Tukey's posthoc test. All experiments were conducted at least three times with similar results.

214 transphosphorylation by BIK1 on CPK28<sup>D188A/S318A</sup> (Fig 3A), Ser318 is likely not the only  
215 site BIK1 phosphorylates on CPK28. Additional BIK1-mediated phosphorylation sites on  
216 CPK28 await to be discovered.

217 BIK1 is part of a large gene family in Arabidopsis, and shares biological function  
218 with its closest homolog PBL1 (57, 65–67). To investigate the genetic requirement of  
219 BIK1 and PBL1 on CPK28-mediated signaling, we generated both *bik1 cpk28-1* double  
220 and *bik1 pbl1 cpk28-1* triple mutants and assessed whether loss of BIK1/PBL1 was able  
221 to suppress *cpk28-1* phenotypes. In congruence with our finding that Ser318  
222 differentially regulates CPK28 function in immune homeostasis, we found that delayed  
223 stem elongation was not suppressed in *bik1 cpk28-1* or *bik1 pbl1 cpk28-1* (Fig 3C), but  
224 that AtPep1-triggered seedling growth inhibition was partially or fully restored in *bik1*  
225 *cpk28-1* and *bik1 pbl1 cpk28-1*, respectively (Fig 3D). These data suggest that the  
226 function of CPK28 in immune signaling, but not in stem elongation, is dependent on  
227 BIK1/PBL1, and provides further evidence for complex regulatory feedback between  
228 BIK1/PBL1 and CPK28.

229

### 230 **Phosphorylation of Ser318 primes CPK28 Ca<sup>2+</sup>-responsiveness**

231 We previously reported on the phosphorylation-dependent Ca<sup>2+</sup>-sensitivity priming of  
232 CPK28 peptide kinase activity (53), and were interested to understand which  
233 phosphorylation site or sites mediated this priming function. We suspected that a  
234 phosphorylation site in either the protein kinase domain, the AIJ, or the CLD would be  
235 responsible for Ca<sup>2+</sup>-priming and therefore generated individual phospho-null (Ser/Thr-

236 to-Ala) mutants for autophosphorylation sites within these domains of CPK28 that we  
237 identified from *in situ* phosphorylated recombinant protein (Fig S5A) (53). Wild-type  
238 hyperphosphorylated CPK28 is insensitive to the addition of excess  $\text{Ca}^{2+}$  in peptide  
239 kinase assays (Fig S5B) (53). We thus hypothesized that phospho-null mutation of the  
240 phosphorylation site(s) responsible for  $\text{Ca}^{2+}$ -sensitivity priming would restore CPK28  
241 activation by excess  $\text{Ca}^{2+}$ . To test this hypothesis, we expressed hyperphosphorylated  
242 forms of each phospho-null mutant and compared peptide kinase activity in untreated  
243 samples versus samples supplemented with  $100 \mu\text{M}$   $\text{CaCl}_2$ . Much to our surprise, our  
244 biochemical analysis converged on Ser318 as a critical regulatory phosphorylation site  
245 of CPK28. Of all the phospho-null mutants tested, only the S318A mutant had enhanced  
246 peptide kinase activity upon addition of excess  $\text{Ca}^{2+}$ . We therefore further characterized  
247 the CPK28<sup>S318A</sup> mutant for  $\text{Ca}^{2+}$ -dependent autophosphorylation and for peptide kinase  
248 activity at different concentrations of  $\text{Ca}^{2+}$ .

249 To confirm that phosphorylation of Ser318 plays a role in  $\text{Ca}^{2+}$ -responsiveness,  
250 we used *Escherichia coli* Lambda phosphatase (LamP)-expressing cells to produce  
251 dephosphorylated His<sub>6</sub>-CPK28 and His<sub>6</sub>-CPK28<sup>S318A</sup> and conducted comparative *in vitro*  
252 autophosphorylation assays either in the complete absence of  $\text{Ca}^{2+}$  (+ 10 mM EGTA), in  
253 the presence of background  $\text{Ca}^{2+}$  (no treatment), or with the addition of excess  $\text{Ca}^{2+}$  (+  
254  $100 \mu\text{M}$   $\text{CaCl}_2$ ). Autophosphorylation levels were detected using pIMAGO. Both His<sub>6</sub>-  
255 CPK28 and His<sub>6</sub>-CPK28<sup>S318A</sup> showed low levels of autophosphorylation in chelation  
256 experiments (Fig 4A), confirming their  $\text{Ca}^{2+}$ -dependence. His<sub>6</sub>-CPK28 was highly active

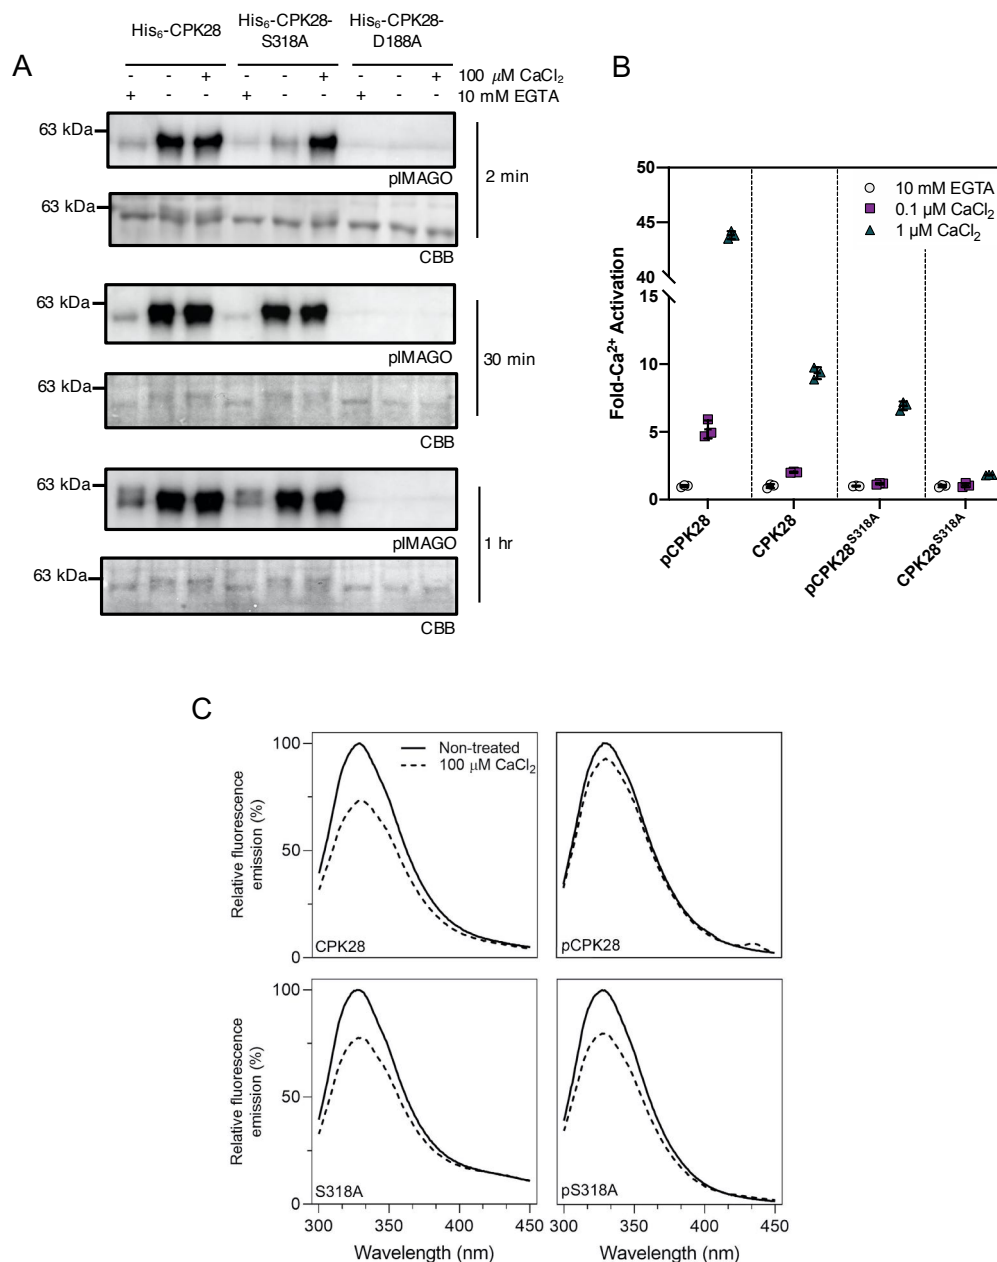

**Figure 4. Phosphorylation at Ser318 primes CPK28 Ca<sup>2+</sup>-responsiveness.** (A) Autophosphorylation of recombinant His<sub>6</sub>-CPK28 or His<sub>6</sub>-CPK28<sup>S318A</sup> without Ca<sup>2+</sup> (+10 mM EGTA), at background Ca<sup>2+</sup> (-EGTA, -CaCl<sub>2</sub>), or with the addition of 100  $\mu$ M CaCl<sub>2</sub> for 1-30 min as indicated. Kinase dead His<sub>6</sub>-CPK28<sup>D188A</sup> was used as a negative control. Phosphorylated proteins were detected using pIMAGO and nylons were stained using Coomassie Brilliant Blue (CBB) to assess protein loading. (B) Peptide kinase activity of phosphorylated (pCPK28, pS318A) and dephosphorylated (CPK28, S318A) purified recombinant proteins at physiological Ca<sup>2+</sup> concentrations. Free Ca<sup>2+</sup> concentrations were established as described in the Experimental Procedures. Mean with standard deviation of three replicate reactions as well as individual values are shown. The experiment was repeated twice with independent preparations of all recombinant proteins with similar results observed each time. (C) Intrinsic Trp fluorescence of dephosphorylated (CPK28, S318A) or hyperphosphorylated (pCPK28, pS318A) His-tagged recombinant proteins before ('non-treated', solid line) or after (dashed line) the addition of 100  $\mu$ M CaCl<sub>2</sub>. Curves are averages of two scans following appropriate background subtraction. Experiments were performed twice using independent preparations of recombinant proteins with similar results observed in both experiments.

257 at background  $\text{Ca}^{2+}$  and was not substantially stimulated by additional  $\text{CaCl}_2$  (Fig 4A). In  
258 contrast, at background  $\text{Ca}^{2+}$  levels, His<sub>6</sub>-CPK28<sup>S318A</sup> displayed dramatically reduced  
259 autophosphorylation activity compared to wild-type protein (Fig 4A). However, when  
260 assays were conducted in the presence of excess  $\text{Ca}^{2+}$ , His<sub>6</sub>-CPK28 and His<sub>6</sub>-  
261 CPK28<sup>S318A</sup> exhibited comparable levels of autophosphorylation (Fig 4A). Together,  
262 these data suggest that phosphorylation of Ser318 is required for full activity when  $\text{Ca}^{2+}$   
263 levels are not saturating. Interestingly, when autophosphorylation assays were allowed  
264 to proceed for longer time intervals (30 min and 1 hr), His<sub>6</sub>-CPK28<sup>S318A</sup> displayed similar  
265 levels of activity as wild-type protein at basal [ $\text{Ca}^{2+}$ ] (Fig 4A). Collectively, these data  
266 suggest that phosphorylation of Ser318 is important for the rapid autophosphorylation of  
267 CPK28 under limiting [ $\text{Ca}^{2+}$ ].

268 To better understand how phosphorylation of Ser318 affects activation of CPK28  
269 by  $\text{Ca}^{2+}$ , we assessed CPK28 peptide kinase activity using the ACSM+1 synthetic  
270 peptide as substrate (53) at  $\text{Ca}^{2+}$  concentrations that would be expected at the lower  
271 (0.1  $\mu\text{M}$ ) and upper (1.0  $\mu\text{M}$ ) range of intracellular physiological conditions.  
272 Phosphorylated and dephosphorylated forms of both His<sub>6</sub>-CPK28 and His-CPK28<sup>S318A</sup>  
273 were used to determine if overall phosphorylation status could supersede the  
274 requirement for site-specific phosphorylation at Ser318. At free  $\text{Ca}^{2+}$  concentrations of  
275 0.1 and 1.0  $\mu\text{M}$ , dephosphorylated His<sub>6</sub>-CPK28 (Fig 4B) displayed ~2- and 9-fold  
276 activation by  $\text{Ca}^{2+}$  relative to EGTA-treated protein, respectively (Fig 4B). Similarly,  
277 phosphorylated CPK28 (Fig 4B) had ~5-fold activation with the addition of 0.1  $\mu\text{M}$  free  
278  $\text{Ca}^{2+}$  and ~43-fold activation with 1.0  $\mu\text{M}$  free  $\text{Ca}^{2+}$  (Fig 4B), indicating that



279 phosphorylation enhances CPK28 peptide kinase activity at physiological  $\text{Ca}^{2+}$ . By  
280 comparison, His<sub>6</sub>-CPK38<sup>S318A</sup> was substantially less active at physiological  $\text{Ca}^{2+}$ , having  
281 negligible activity at 0.1  $\mu\text{M}$   $\text{Ca}^{2+}$  (relative to EGTA-treated protein) regardless of its  
282 overall phosphorylation status and only ~2 and 7-fold activation for dephosphorylated  
283 and phosphorylated His<sub>6</sub>-CPK28<sup>S318A</sup>, respectively, at 1.0  $\mu\text{M}$   $\text{Ca}^{2+}$ . Collectively, these  
284 results indicate that phosphorylation of Ser318 is prerequisite for substrate  
285 phosphorylation by CPK28 at low free  $\text{Ca}^{2+}$ , and that phosphorylation of Ser318 is  
286 required for full responsiveness to  $\text{Ca}^{2+}$  elevations within the physiological range. Taken  
287 together, these data support the hypothesis that phosphorylation of Ser318 is uniquely  
288 important in priming CPK28 for activation by  $\text{Ca}^{2+}$  at concentrations that would be  
289 expected under cellular conditions.

290

### 291 **Ser318 phosphorylation promotes a $\text{Ca}^{2+}$ -bound conformation**

292 Ser318 is located at the C-terminal end of the canonical protein kinase domain of  
293 CPK28, very close to the autoinhibitory junction (AIJ) (Fig 1A), suggesting that  
294 phosphorylation of Ser318 might affect  $\text{Ca}^{2+}$ -dependent conformational changes of the  
295 AIJ-CAD fragment of CPK28. To better understand the biochemical function of Ser318  
296 phosphorylation, we measured  $\text{Ca}^{2+}$ -induced conformational changes in hyper- and  
297 hypo-phosphorylated CPK28 and CPK28<sup>S318A</sup> by intrinsic Trp fluorescence. Trp  
298 fluorescence emission properties depend on the local environment of Trp residues, and  
299 can thus be used to assess protein conformational changes (68). For dephosphorylated  
300 His<sub>6</sub>-CPK28 and His<sub>6</sub>-CPK28<sup>S318A</sup> (Fig 4C), Trp fluorescence emission decreased

301 following the addition of 100  $\mu$ M CaCl<sub>2</sub> (relative to non-treated protein), indicating that  
302 CPK28 undergoes a Ca<sup>2+</sup>-dependent conformational change. By comparison, Trp  
303 fluorescence of hyper-phosphorylated His<sub>6</sub>-CPK28 showed only a marginal decrease  
304 after addition of excess Ca<sup>2+</sup> (Fig 4C), suggesting that CPK28 phosphorylation promotes  
305 a Ca<sup>2+</sup>-bound conformation at low levels of Ca<sup>2+</sup>. In agreement with our activity assays,  
306 Trp fluorescence of hyper-phosphorylated His<sub>6</sub>-CPK28<sup>S318A</sup> decreased similar to the  
307 wild-type dephosphorylated protein, suggesting that phosphorylation of Ser318 is  
308 responsible for the effect observed with hyperphosphorylated CPK28.

309

#### 310 **Ser318 is a conserved and unique feature of subgroup IV CDPKs**

311 CDPK gene families are highly conserved across land plants and form four major  
312 subgroups (26, 27). To determine the level of conservation of Ser318, the amino acid  
313 sequences of CPK28 and other subgroup IV orthologs from all genomes available on  
314 Phytozome were compared. Amongst the 114 sequences included in our analysis, a  
315 Ser residue was strictly conserved at the position orthologous to Ser318 of AtCPK28  
316 (Fig 5A and Fig S1). Comparison of all subgroup I-III CDPKs from 12 representative  
317 species spanning all major taxonomic groups indicated that although several flanking  
318 residues are highly conserved in all subgroups, conservation of Ser318 is a unique and  
319 specific feature of subgroup IV CDPKs (Fig 5A).

320 To determine if the Ca<sup>2+</sup>-priming function of Ser318 autophosphorylation is  
321 conserved, we generated a phospho-ablative variant of the rice CPK28 ortholog  
322 (OsCPK4<sup>S315A</sup>). Short 1 min autophosphorylation assays were conducted using

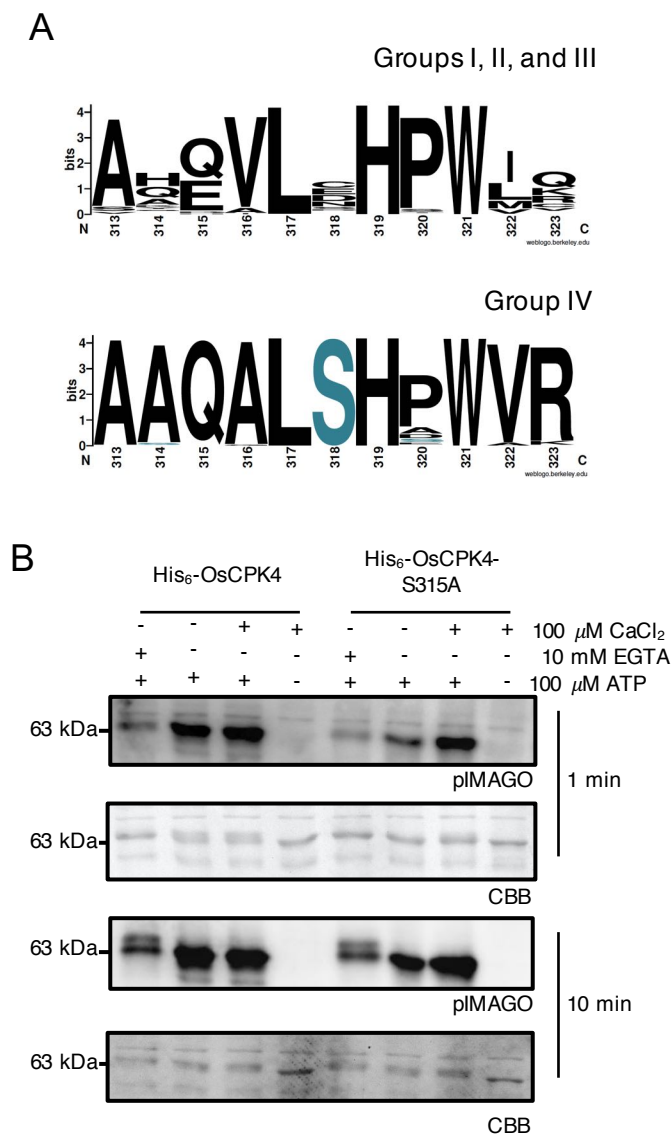

**Figure 5. Ser318 is a conserved feature of group IV CDPKs.** (A) Amino acid consensus at position 318 (AtCPK28) across CDPK subgroups. Sequences were retrieved from Phytozome and aligned as described in the Experimental Procedures. Logos were generated using WebLogo (97). (B) Autophosphorylation of recombinant His<sub>6</sub>-OsCPK4 and His<sub>6</sub>-OsCPK4<sup>S315A</sup>. Reactions were carried out in the absence of Ca<sup>2+</sup> (+10 mM EGTA), in the presence of background Ca<sup>2+</sup> (-EGTA, -CaCl<sub>2</sub>), or with the addition of 100 μM CaCl<sub>2</sub> for 1 or 10 min as indicated in figures. Phosphorylation was detected using pIMAGO. Nylons were stained with Coomassie Brilliant Blue (CBB) to assess protein loading. All experiments were conducted at least three times with similar results.

323 recombinant His<sub>6</sub>-OsCPK4 and His<sub>6</sub>-OsCPK4<sup>S315A</sup> produced in LamP-expressing *E. coli*  
324 cells, as described above. His<sub>6</sub>-OsCPK4 displayed a clear requirement for Ca<sup>2+</sup> with a  
325 marked decrease in overall phosphorylation in the presence of 10 mM EGTA (Fig 5B).  
326 While wild-type His<sub>6</sub>-OsCPK4 displayed high levels of autophosphorylation at basal  
327 [Ca<sup>2+</sup>], His<sub>6</sub>-OsCPK4<sup>S315A</sup> was comparatively less active (Fig 5B). The addition of 100  
328 μM CaCl<sub>2</sub> did not further activate His<sub>6</sub>-OsCPK4 but did restore His<sub>6</sub>-OsCPK4<sup>S315A</sup>  
329 autophosphorylation levels to that observed with wild-type protein (Fig 5B). Together,  
330 these data provide evidence of a conserved biochemical function for phosphorylation of  
331 this residue in orthologous CDPKs across the plant lineage.

332

333

## 334 **DISCUSSION**

335

336 Expansion of CDPKs in plants is predicted to have occurred under selective adaptation  
337 for kinases with varying Ca<sup>2+</sup> sensitivities (27), however the biophysical properties  
338 underlying Ca<sup>2+</sup> sensitivity are not fully understood. Analysis of protein sequences from  
339 Arabidopsis indicates that CDPKs with little or no requirement for Ca<sup>2+</sup> possess one or  
340 more degenerated EF-hand motifs (37, 69). However, some CDPKs with the ability to  
341 bind Ca<sup>2+</sup> do not require it for their activation (30, 70–72) pointing to additional  
342 mechanisms regulating CDPK function. Previous work has shown that *in situ*  
343 autophosphorylation “primes” Arabidopsis CPK28 for Ca<sup>2+</sup> activation *in vitro* (53). Here,  
344 we demonstrated that phosphorylation at one site, CPK28-Ser318, is responsible for

345 autophosphorylation-based priming when  $\text{Ca}^{2+}$  concentrations are limiting (Fig 4A-B).  
346 Additionally, *in vivo* phosphorylation at Ser318 was required for CPK28 function in  
347 immune homeostasis (Fig 1C-E) but not stem elongation (Fig 1B), suggesting a role in  
348 stimulus-specific activation of a multifunctional protein kinase through  $\text{Ca}^{2+}$ -sensitivity  
349 priming.

350 Autophosphorylation has been correlated with the activation (15, 53, 73–75) or  
351 inhibition (72, 75, 76) of several CDPKs, although the mechanisms of regulation remain  
352 largely unknown. Phosphorylation could influence interactions with protein substrates  
353 (75, 77) or induce changes in secondary protein structure causing transitions between  
354 functional enzyme states (78, 79). A complete crystal structure for a plant CDPK has not  
355 yet been resolved; however, a mechanism for  $\text{Ca}^{2+}$  activation has been proposed based  
356 on the structures of apicomplexan CDPKs (31–33). Experiments using *Toxoplasma*  
357 *gondii* TgCDPK1/2 and *Cytosporidium parvum* CpCDPK1 demonstrate that  $\text{Ca}^{2+}$   
358 activation is reversible with contact sites between the CaM-like domain and kinase  
359 domain stabilizing both active and inactive forms (31). Many of the residues that  
360 stabilize these conformations are conserved between plants and protists (32)  
361 suggesting similar contact sites may exist in plants.

362 CPK28-Ser318 resides in the C-terminal portion of the kinase domain in close  
363 proximity to the AIJ (Fig 1A). Although we could not generate a high confidence  
364 structural model of CPK28 using the crystal structures of  $\text{Ca}^{2+}$ -bound CDPKs, modeling  
365 of CPK28 using inactive TgCDPK1 (31) indicated that Ser318 is likely surface-localized,

366 directed away from the active site of the kinase domain (Fig S6). In this position,  
367 phosphorylated Ser318 would not interact with established contact sites, such as the  
368 autoinhibitory triad (31), or other interactions between the pseudosubstrate region and  
369 the active site of the kinase domain. We rather propose that phosphorylation of Ser318  
370 could induce a structural change in the AIJ that prohibits stabilization of the inactive  
371 conformation. This could cause the protein to adopt an “intermediate” conformation that  
372 can more readily move to the active state upon  $\text{Ca}^{2+}$  binding (Fig 6). In support of this  
373 idea, our analysis of intrinsic Trp fluorescence of CPK28 and CPK28<sup>S318A</sup> suggests that  
374  $\text{Ca}^{2+}$ -dependent conformational changes can occur at a lower concentration of  $\text{Ca}^{2+}$  in  
375 the hyper- compared to de-phosphorylated protein and that the conformational change  
376 at low  $\text{Ca}^{2+}$  requires Ser318 phosphorylation (Fig 4C). Phosphorylation of Ser318 could  
377 also stabilize the active conformation, serving a similar function to autophosphorylation  
378 of a residue in the autoinhibitory region (Thr286) of CaMKII from rat brain, which  
379 renders CaMKII substrate phosphorylation independent of both  $\text{Ca}^{2+}$  and CaM (80, 81).

380 Overall, our analysis of CPK28 autophosphorylation, peptide kinase activity, and  
381 conformational changes collectively suggest that phosphorylation of Ser318 near the  
382 AIJ promotes an open, active conformation of CPK28 at low  $\text{Ca}^{2+}$  concentrations (Fig  
383 6). Currently, it is not clear whether this conformational state results in enhanced affinity  
384 of the CaM-like domain for  $\text{Ca}^{2+}$ , or whether pSer318 exerts allosteric effects promoting  
385 release of the AIJ from the kinase domain. Notably, we recently demonstrated that CaM  
386 binds to an area of the CPK28 AIJ to inhibit both *in vitro* auto- and trans-phosphorylation

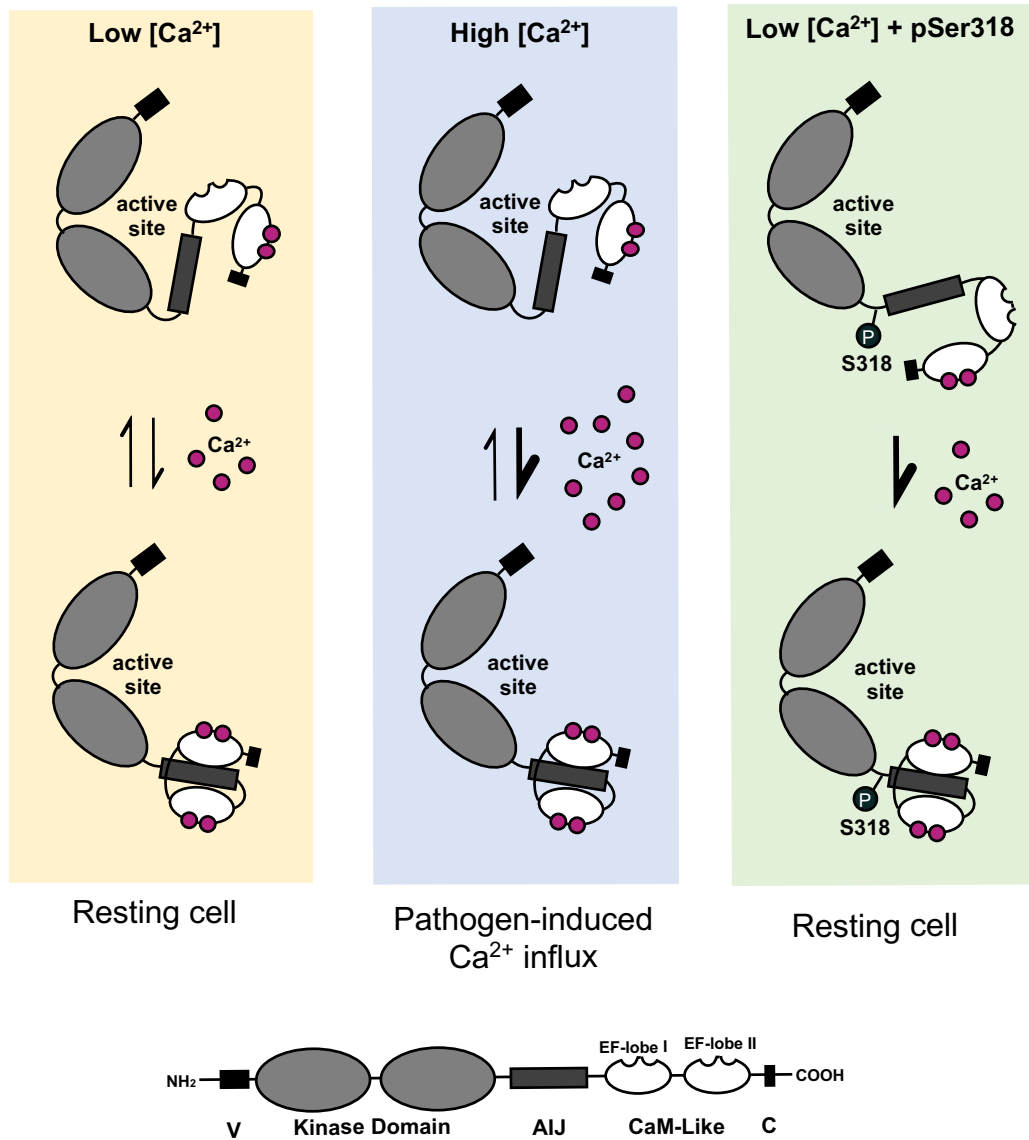

**Figure 6. Model for CPK28 activation.** Proposed mechanism of  $Ca^{2+}$ -sensitivity priming of CPK28 by phosphorylation of Ser318. In a resting cell, CPK28 transitions between active and inactive conformations, binding and releasing  $Ca^{2+}$  from the amino-terminal EF-hand lobe of the calmodulin (CaM)-like domain.  $Ca^{2+}$  elevation during signaling events shifts this equilibrium towards the activated state via  $Ca^{2+}$ -induced conformational changes. When Ser318 is phosphorylated, the transition of CPK28 from an inactive to an active state occurs at lower  $Ca^{2+}$  concentrations possible via stabilizing a conformation in which the AIJ is excluded from the active site.

367 activity (53), and that CPK28 autophosphorylation relieves this inhibition (53). Ser318  
368 phosphorylation could conceivably block CaM binding or, alternatively, CaM could  
369 prevent Ser318 phosphorylation. Resolving an intact crystal structure for CPK28, and  
370 other plant CDPKs, will provide valuable insight into the activation of these kinases and  
371 allow for investigation into the possible structural roles of phosphorylation.

372         From a physiological perspective, phosphorylation of Ser318 would allow CPK28  
373 to be active in a cell under resting conditions. Indeed, CPK28 promotes the degradation  
374 of BIK1 prior to the activation of immune signaling (49, 50). Limiting BIK1 accumulation  
375 is critical to prevent mounting an immune response in the absence of pathogen  
376 invasion. Ser318 was identified as an *in vivo* phosphorylation site in unstimulated cells  
377 (51), indicating no requirement for immune activation. A 25-fold increase in  
378 phosphorylated peptides corresponding to pSer318 were identified in *cpk28-1*  
379 protoplasts expressing CPK28-YFP compared to the kinase inactive variant  
380 (CPK28<sup>D188A</sup>-YFP), suggesting that Ser318 is an autophosphorylation site *in vivo* (51).  
381 Our *in vitro* data indicates that CPK28 undergoes both intra- and inter-molecular  
382 autophosphorylation at Ser318 (Fig 2) and can also be transphosphorylated by BIK1  
383 (Fig 3A and 3B), although a higher level of phosphorylation was detected on  
384 autophosphorylated CPK28 in our assays (Fig 3B). Whether Ser318 phosphorylation  
385 occurs by autophosphorylation and/or BIK1-mediated transphosphorylation *in vivo* is  
386 unknown, but our *in vitro* analyses clearly establish the potential for both mechanisms



387 as drivers of Ser318 phosphorylation *in vivo*. How these distinct events would contribute  
388 to CPK28-mediated BIK1 proteostasis remains an open and challenging question.

389           Nevertheless, it is tempting to speculate that BIK1 transphosphorylation could  
390 contribute to CPK28 regulation. Our epistasis analysis indicates that CPK28-mediated  
391 immune signaling is dependent on BIK1 and its homolog, PBL1 (Fig 3D). However, loss  
392 of *bik1 pbl1* in *cpk28-1* mutants restored *cpk28-1* growth inhibition to levels observed in  
393 Col-0 seedlings (Fig 3D), suggesting the involvement of additional RLCKs in response  
394 to endogenous immune peptide elicitation. In rice, OsRLCK176 phosphorylates  
395 OsCPK4 at three sites: Thr73, Ser210 and Ser381 (64), corresponding to CPK28-  
396 Thr76, -Ser213, and -Val384. Phosphorylation at these sites activates OsCPK4 as part  
397 of a regulatory feedback loop to control immune output through continual degradation of  
398 OsRLCK176 (64). Our *in vitro* kinase assays suggest that BIK1 phosphorylates CPK28  
399 at Ser318 and additional, currently unknown, residues (Fig 3A). Given the high  
400 conservation of this immune signalling network (82), Thr76 and Ser213 are likely  
401 candidates for future analysis. In Arabidopsis, BIK1 turnover is mediated by CPK28-  
402 dependent phosphorylation and activation of the E3 ubiquitin ligases PUB25 and  
403 PUB26, which target BIK1 for 26S proteasomal degradation (49). Previous work  
404 indicates that CPK28 is also capable of phosphorylating BIK1 *in vitro* (50), although the  
405 biochemical and biological consequences of this transphosphorylation are not known. It  
406 is therefore plausible that BIK1 accumulation could be modulated by an interplay of

407 BIK1 ubiquitination and trans-phosphorylation events between CPK28 and BIK1, which  
408 is a current area of investigation.

409         Our cumulative data indicate that phosphorylation of Ser318 would render  
410 CPK28 highly responsive to slight increases in Ca<sup>2+</sup> following immune activation,  
411 preventing initiation of a robust immune response. Ser318 phosphorylation could  
412 additionally slow CPK28 deactivation following a primary pathogen attack, making  
413 plants more susceptible to secondary infection. In accordance with its role in BIK1  
414 turnover, overexpression of CPK28 dampens the MAMP-triggered Ca<sup>2+</sup> (48) and  
415 oxidative (50) bursts, which are dependent on BIK1 and PBL1 (48, 50). This implies that  
416 CPK28 overactivation could additionally prevent the establishment of systemic acquired  
417 resistance which is reliant on ROS/Ca<sup>2+</sup> signal propagation (34, 83, 84). In order to  
418 buffer these attenuation mechanisms the plant would need to adopt a safeguard against  
419 sustained activation of CPK28. Recent work has demonstrated that following cell  
420 stimulation with AtPep1 (85) or the bacterial flagellin immunogenic epitope flg22 (86),  
421 alternative *CPK28* transcripts are produced that generate a truncated isoform that lacks  
422 the C-terminal EF-hand lobe. This CPK28 variant could act to outcompete Ca<sup>2+</sup>  
423 “competent” proteins for downstream substrates, alleviating immune attenuation (87).  
424 Thus, CPK28 signaling appears to be intricately regulated at both the post-  
425 transcriptional and post-translational levels.

426         Despite the clear requirement for Ser318 phosphorylation in immune signaling  
427 (Fig 1C-E), *cpk28-1* plants expressing CPK28<sup>S318A</sup> displayed normal stem elongation

428 (Fig 1B). The catalytic activity of CPK28 is indispensable for all known biological  
429 functions (50, 51); however, the lower kinase activity of CPK28<sup>S318A</sup> at physiologically  
430 relevant Ca<sup>2+</sup> concentrations (Fig 4A-B) did not impair stem elongation (Fig 1B),  
431 suggesting pathway-specific requirements for full CPK28 catalytic activity. We speculate  
432 that more processive genetic programs, such as those that occur in developmental and  
433 reproductive processes, would not require CDPKs to be as responsive to Ca<sup>2+</sup> as  
434 stress-induced signals. In support of this hypothesis, prolonged exposure to low levels  
435 of Ca<sup>2+</sup> relieved the requirement of Ser318 phosphorylation for full kinase activity in  
436 autophosphorylation assays (Fig 4A). In a physiological context, the phosphorylation  
437 status of CPK28 is likely dictated by a combination of kinase and phosphatase activities  
438 to precisely control CPK28 function. Although pathway-specific CPK28 binding partners  
439 have not yet been identified in the reproductive phase transition, it is possible that such  
440 associations could increase kinase activity or lower Ca<sup>2+</sup> requirements.

441         The development of pathogen resistant crops can be complicated by growth  
442 trade-offs associated with the overactivation of immune signalling (88, 89). For example,  
443 prolonged activation of immune receptors by MAMP stimulation causes seedling growth  
444 inhibition (90, 91) and the formation of lesions (92, 93). Ablation of Ser318  
445 phosphorylation allowed us to generate a *CPK28* allele that displays enhanced  
446 resistance to *Pto* DC3000 (Fig 1E) with no consequences to plant growth (Fig 1B).  
447 Group IV CDPKs are highly conserved across all land plants (26) and fulfill conserved  
448 roles as regulators of immune signaling (82) and reproductive development (51, 94–96)

449 in multiple plant species. Accordingly, our *in vitro* analysis of OsCPK4 indicated that, on  
450 a biochemical level, phosphorylation of Ser315 (analogous to CPK28-Ser318) has a  
451 conserved function in rice (Fig 4D). Additionally, a Ser residue at this site was identified  
452 as a unique feature of group IV CDPKs across all surveyed land plants (Fig 4C).  
453 Cumulatively, our data suggests that ablation of “Ser318” phosphorylation in species  
454 with agricultural value could serve as an effective tool for the development of disease  
455 resistance without associated costs to fitness or yield.

456

457

## 458 **EXPERIMENTAL PROCEDURES**

459

### 460 **Plant growth conditions**

461 *Arabidopsis thaliana* plants were grown either in soil or sterile media depending on the  
462 assay. For soil assays, seeds were stratified for 2-3 days at 4°C, sown on soil, and  
463 transplanted as one plant per pot in Sunshine Mix 1 soil (Sungro) for 5 weeks in  
464 temperature-controlled growth chambers in the Queen’s University Phytotron at 22°C  
465 with 10 h light (150-160  $\mu\text{E m}^2 \text{s}^{-1}$ ) and no humidity control. Oxidative burst and  
466 pathogen infection assays were conducted on soil-grown plants 3-4 weeks post  
467 germination (wpg), prior to reproductive stage transition. For assessment of stem  
468 elongation, plants were subsequently transferred to a growth chamber maintained at  
469 22°C, with a 16 h photoperiod (150-160  $\mu\text{E m}^2 \text{s}^{-1}$ ), and 30% relative humidity for 1-2

470 weeks or until all plants had produced reproductive bolts. For sterile assays, seeds  
471 were surface-sterilized using 50% bleach, stratified for 2-3 days at 4°C, and germinated  
472 on 0.8% agar plates with 0.5x Murashige and Skoog (MS) media for 3-4 days and then  
473 transplanted into liquid 0.5x MS supplemented with 1% sucrose. Sterile seedlings were  
474 grown at ambient temperature with 10 h light 150-160  $\mu\text{E m}^2 \text{s}^{-1}$  and assays were  
475 conducted at 2 wpg. Soil-grown *A. thaliana* plants were fertilized biweekly with 1.5 g L<sup>-1</sup>  
476 20-20-20 NPK. Predatory *Amblyseius swirskii* mites (Koppert Biological Systems) were  
477 released into growth chambers biweekly as a precautionary measure against  
478 greenhouse pests, according to manufacturer's instructions.

479

## 480 **Plant materials**

481 Stable *A. thaliana* transgenics were generated via *Agrobacterium tumefaciens*  
482 (GV3101)-mediated floral dip transformation (97). T<sub>1</sub> plants were selected on MS agar  
483 plates containing 50  $\mu\text{g/mL}$  hygromycin. Only lines displaying a 3:1 segregation ratio on  
484 selective media in the T<sub>2</sub> generation were bred to homozygosity and used in  
485 complementation experiments. Stable *cpk28-1/35S:CPK28-YFP*, *cpk28-*  
486 *1/35S:CPK28<sup>S318A</sup>-YFP*, and *cpk28-1/35S:CPK28<sup>D188A</sup>-YFP* *Arabidopsis* lines were  
487 previously described (51). Higher-order mutants were generated by crossing *bik1* or  
488 *bik1 pbl1* (65) mutants with *cpk28-1* (51) and bred to homozygosity using PCR-based  
489 genotyping. Table S1 includes a list of all germplasm used and generated in this study.

490

## 491 **Molecular cloning**

492 The *pCPK28:CPK28-FLAG* construct was cloned by fusing the coding sequence of  
493 *CPK28* downstream of its native promoter (1742 bp upstream of the start codon) and in  
494 frame with a C-terminal FLAG peptide using digestion-ligation cloning into a pGREENII-  
495 based binary vector carrying the aminoglycoside phosphotransferase gene from *E. coli*  
496 for hygromycin B resistance in plants (98). Both the *pT7:His<sub>6</sub>-CPK28* construct in  
497 pET28a+ (EMD Biosciences), and the *pT7:MBP-His<sub>6</sub>-CPK28* construct in pOPINM  
498 (Novagen), have been described previously (50, 53). Site-directed mutagenesis was  
499 used to generate CPK28 mutant constructs using overlapping complementary primers  
500 as described previously (50), using either pGREENII-based binary plasmids or pET28a+  
501 clones as the template. The coding region of *BIK1* was PCR-amplified from previously  
502 described pENTR-BIK1 or pENTR-BIK1<sup>K105A/K106A</sup> vectors (65) and cloned into bacterial  
503 expression vector pGex6.1 (GE Healthcare) by Gibson Assembly (NEB) to generate  
504 *pT7:GST-BIK1* and catalytically-inactive *pT7:GST-BIK1<sup>K105A/K106A</sup>* constructs.  
505 *pET100:His<sub>6</sub>-OsCPK4* and *pET100:His<sub>6</sub>-OsCPK4<sup>S315A</sup>* constructs were synthesized by  
506 GeneArt™ (Fisher Scientific). The coding region of PUB25 was PCR-amplified from  
507 previously described pET28a:PUB25 vectors (49) and cloned into bacterial expression  
508 vector pMAL-c2x (GE Healthcare) by digestion and ligation cloning using *Xba*I and *Pst*I-  
509 HF (NEB) to produce pMAL-c2x:MBP-PUB25. PUB26 was PCR amplified from  
510 pCAMBIA1300-35S:PUB26-FLAG (49) and cloned into pMAL-c2x using *Xba*I and *Pst*I-  
511 HF to produce pMAL-c2x:MBP-PUB26. All clones were confirmed by Sanger  
512 Sequencing using plasmid- and/or gene-specific primers (The Center for Applied

513 Genomics, Hospital for Sick Children, Toronto Canada, or Eurofins Genomics,  
514 Ebersberg, Germany). All primers used for cloning are listed in Table S1.

515

## 516 **Confocal Microscopy**

517 Leaf discs were sampled from 4-6 week-old Arabidopsis soil grown plants using a 4 mm  
518 biopsy punch (Integra Miltex) and were wet-mounted in water with the abaxial surface  
519 facing upwards prior to confocal imaging. Imaging was performed using a LSM 710  
520 (Zeiss) confocal microscope with excitation at 488 nM for YFP and a range of 510-540  
521 nM for measuring emission. To detect chlorophyll autofluorescence, an excitation  
522 wavelength of 543 nM and a range of 680-760 nM for detecting emission was used.

523

## 524 **Immune assays**

525 AtPep1(99) and elf18 (100) used for immune assays were synthesized by EZBiolab  
526 (USA). AtPep1-induced SGI and ROS burst assays were performed as previously  
527 described (101). Infection assays were conducted using virulent *Pseudomonas syringae*  
528 pv. *tomato* (*Pto* DC3000) on soil-grown *A. thaliana* plants using a needleless syringe as  
529 outlined previously (50).

530

## 531 **Generation of the anti-pSer318 antibody**

532 The CPK28 pSer318 antibody was generated and purified by LifeTein (New Jersey,  
533 USA). Briefly, rabbits were immunized with KLH-coupled synthetic peptide  
534 corresponding to the region of CPK28 surrounding Ser318 (NH<sub>2</sub>-  
535 CKDPRARLTAAQALpSHAWV-COO-). KLH coupling was facilitated by the addition of  
536 Cys to the N-terminus of the peptide. Antibody was purified first by enrichment against  
537 the pSer318 phospho-peptide and then by negative enrichment against an  
538 unphosphorylated version of the peptide to remove non-phospho-specific IgGs. Purified  
539 antibodies were validated by immunoblotting against wildtype, kinase-dead (K91E), or  
540 S318A recombinant CPK28 proteins. Purified antibodies were determined to be  
541 phosphorylation and site-specific.

542

## 543 **Recombinant protein expression and purification**

544 All recombinant CPK28 clones were transformed into lambda phosphatase-expressing  
545 BL21 (DE3) *E.coli* cells for the production of dephosphorylated proteins or into T7  
546 Express cells (New England Biolabs) for production of hyperphosphorylated protein  
547 (53). Cultures were grown in Luria-Burtani (LB) broth at 37 °C to an OD<sub>600</sub> of ~0.6-0.8.  
548 Expression was induced using 1 mM of β-D-1-thiogalactopyranoside (IPTG) for 16-18 h  
549 at room temperature with gentle shaking. Bacterial cells were harvested at 3,500 x *g* for  
550 25 min at 4 °C and resuspended in 50 mL of extraction buffer containing 50 mM Tris-  
551 HCl (pH 7.5), 100 mM NaCl and 1 protease inhibitor cocktail tablet (SigmaAldrich). Cells



552 were lysed by passing the resuspended culture through a French press (Glen Mills®  
553 High Pressure Cell Disruption) 3 times. Lysates were clarified by centrifugation at  
554 35,000 x *g* for 40 min at 4 °C. His<sub>6</sub>-CPK28 proteins were immobilized on a nickel-  
555 nitrilotriacetic acid (NTA) gravity flow column (ThermoFisher) as described previously  
556 (53). Elution fractions were dialyzed against two exchanges of 2,500 volumes of 25 mM  
557 Tris-HCl (pH7.5), 50 mM NaCl and 1 mM DTT at overnight 4 °C. Recombinant  
558 production of GST-BIK1 and GST-BIK1-KD in BL21(DE3)-VR2-pACYC-LamP *E. coli*  
559 cells was conducted as described above in a phosphate buffered saline (PBS) solution  
560 (ThermoFisher) containing 1 mM DTT, 1 mM PMSF, and 6 mM MgCl<sub>2</sub>. Proteins were  
561 immobilized on a glutathione agarose gravity flow column (Qiagen) washed 5 times with  
562 PBS solution and eluted in 50 mM Tris-HCl (pH 8.0), 5 mM DTT, and 10 mM reduced  
563 glutathione. All proteins were concentrated using Pierce™ 3000 MWCO concentration  
564 columns (ThermoFisher) to a final concentration of approximately 1.5 mg/mL, as  
565 determined by Bradford analysis (Bio-Rad) against bovine serum albumin standards.  
566 Recombinant production of MBP-PUB25 and MBP-PUB26 were conducted as  
567 described above with the following modifications. pMAL-c2x:MBP-PUB25/26 were  
568 transformed into BL21(DE3) *E. coli* cells. Cultures were grown in a baffled flask with LB  
569 broth at 37°C to an OD<sub>600</sub> of ~0.6-0.8 then expression was induced using 0.1 mM IPTG  
570 for 3 hours at room temperature with gentle shaking. Pelleted cells were resuspended in  
571 MBP column buffer containing 20 mM Tris HCl pH 7.4, 200 mM NaCl, 1 mM EDTA, 1  
572 mM DTT, and 1 mM PMSF. MBP-PUB25/26 were purified using Amylose Resin (NEB)  
573 by batch purification according to manufacturer's instructions. Protein was eluted using

574 100  $\mu$ L elution buffer and used for assays on the same day as the purification. Purity  
575 was assessed by SDS-PAGE analysis followed by staining with Coomassie Brilliant  
576 Blue total protein stain. Protein aliquots were flash frozen in liquid N<sub>2</sub> and stored at -80  
577 °C until use.

578

### 579 ***In vitro* autophosphorylation assays**

580 Autophosphorylation assays were conducted by incubating 5  $\mu$ g of purified His<sub>6</sub>-  
581 CPK28/His<sub>6</sub>-OsCPK4 or mutant variants in a 50  $\mu$ L reaction containing 25 mM Tris-HCl  
582 (pH7.5), 10 mM DTT, 100  $\mu$ M ATP, and 100  $\mu$ M CaCl<sub>2</sub> or 10 mM EGTA, where  
583 specified. Proteins were allowed to autophosphorylate at room temperature for 1-60  
584 min, as specified in figures. Reactions were stopped by the addition of 6x Laemmli  
585 sample buffer (LSB) and heating at 80 °C for 5 min. Reactions were analysed  
586 immediately or stored at -20 °C before SDS-PAGE and immunoblotting.

587 Autophosphorylation was detected using the pIMAGO kit (Tymora Analytical) according  
588 to manufacturer's instructions.

589

### 590 ***In vitro* trans-phosphorylation assays**

591 Trans-autophosphorylation assays were performed using 2  $\mu$ g of His<sub>6</sub>-MBP-CPK28 or  
592 His<sub>6</sub>-MBP-CPK28<sup>D188A</sup> and 4  $\mu$ g of His<sub>6</sub>-CPK28<sup>D188A</sup> in the same reaction buffer as in  
593 the autophosphorylation assays at 30 °C for 30 min. Trans-phosphorylation assays  
594 were conducted using 2  $\mu$ g of purified GST-BIK1 or GST-BIK1<sup>K105A/K106A</sup> and 4  $\mu$ g of

595 His<sub>6</sub>-CPK28<sup>D188A</sup> or His<sub>6</sub>-CPK28<sup>D188A/S318A</sup> in a 20 µL total reaction volume of 25 mM  
596 Tris-HCl (pH 7.5), 10 mM MgCl<sub>2</sub>, 1 mM DTT and 100 µM ATP at 30 °C for 30 min.  
597 Reactions were stopped by adding 6x LSB buffer and heating at 80 °C for 5 min.  
598 Reactions were analysed immediately or stored at -20 °C before visualizing  
599 phosphorylated proteins using Phospho-Tag gel stain (APB Bio) according to the  
600 manufacturer's instructions.

601

### 602 **Ca<sup>2+</sup>-activation assays**

603 Analysis of CPK28 peptide kinase activity was carried out as exactly as previously  
604 described (53) using the ACSM+1 peptide (NH<sub>2</sub>-NNLRLSMGKR-COO<sup>-</sup>) as substrate.  
605 Briefly, reactions contained 40 mM Tris-HCl, pH 7.5, 1 mM DTT, 10 mM MgCl<sub>2</sub>, 100 µM  
606 ATP, 0.1 µCi/µl [γ-<sup>32</sup>P]ATP (150 cpm/pmol), 500 ng purified of His<sub>6</sub>-CPK28 or the  
607 S318A site directed mutant as indicated in the figures, and 10 µM peptide substrate.  
608 Reactions were initiated by addition of an ATP/[γ-<sup>32</sup>P]ATP mixture. Reactions contained  
609 combinations of CaCl<sub>2</sub>, or EGTA as indicated in the appropriate figures. For  
610 experiments at physiological Ca<sup>2+</sup>, final free Ca<sup>2+</sup> concentrations were achieved by  
611 buffering CaCl<sub>2</sub> with EGTA, calculated using the online WEBMAXC Extended calculator  
612 (102). Final reaction volumes were 40 µl. After addition of the ATP/[γ-<sup>32</sup>P]ATP mixture,  
613 reactions were allowed to proceed for 10 min at room temperature and were stopped by  
614 spotting 35 µl of each reaction onto P81 phosphocellulose cation exchange paper  
615 followed by washing three times for 5 min each in 0.45% (v/v) *o*-phosphoric acid.  
616 Incorporation of <sup>32</sup>P was assessed by liquid scintillation counting.

## 617 **Intrinsic Trp fluorescence measurements**

618 Intrinsic Trp fluorescence of recombinant purified dephosphorylated or  
619 hyperphosphorylated His<sub>6</sub>-CPK28 or His<sub>6</sub>-CPK28<sup>S318A</sup> was performed in a PTI  
620 QuantaMaster steady-state spectrofluorimeter (Horiba Scientific) in a quartz cuvette  
621 with a 1 cm pathlength (Hellma USA Inc.). Data acquisition and background subtraction  
622 were performed using the FeliXGX software package (Horiba Scientific). Measurements  
623 were carried out on samples of CPK28 at a concentration of 200 nM in a buffer  
624 containing 20 mM HEPES-NaOH pH 7.2, 100 mM KCl, and 1 mM DTT. Trp  
625 fluorescence was measured at background Ca<sup>2+</sup> levels ('non-treated') and after the  
626 titration of 100 μM CaCl<sub>2</sub> into the same sample. Samples were measured at an  
627 excitation wavelength of 288 nm and fluorescence was collected between 300-450 nm  
628 in 1 nm steps with a dwell time of 1 second at each step. Each curve represents an  
629 average of two replicate scans of the same sample after appropriate background  
630 subtraction of buffer alone or buffer titrated with 100 μM CaCl<sub>2</sub>. Experiments were  
631 performed twice on independent preparations of all recombinant proteins.

632

## 633 **Phylogenetic analysis**

634 To determine the conservation of Ser318 in group IV CDPKs, the full-length AtCPK28  
635 protein sequence was used as a query in the Phytozome 12 BLAST tool, which  
636 identified a total of 114 amino acid sequences from 53 species (File S1). Similarly, the  
637 full-length sequences of all group I, II, and III AtCPKs were queried in Phytozome 12

638 BLAST limited to twelve species spanning the plant lineage (*M. polymorpha*, *P. patens*,  
639 *S. fallax*, *S. moellendorffi*, *A. trichopoda*, *O. sativa*, *A. thaliana*, *V. vinifera*, *R. comunis*,  
640 *B. rapa*, *T. cacao*, and *M. truncatula*) and a total of 327 amino acid sequences were  
641 retrieved (File S2). FASTA sequences were aligned using MUSCLE in MEGAX and the  
642 11-amino acid window spanning Ser318 was extracted for visualization of conservation  
643 using WebLogo (103).

644

### 645 **Protein modeling**

646 CPK28 was modeled using PHYRE2.0 Protein Fold Recognition Server (104) on  
647 Intensive Mode and visualized using PyMol Molecular Graphics System Version 2.4.0.  
648 The crystal structure of inactive TgCDPK1 (PDB:3KU2) was used as a template.

649

### 650 **Statistical analysis**

651 Statistical significance was determined by a Student's T-test or one-way ANOVA  
652 followed by Tukey's post hoc test using GraphPad Prism version 8, as indicated.

653

654

655

656

657

## 658 **ACKNOWLEDGMENTS**

659

660 We gratefully acknowledge Ray Zielinski for thoughtful guidance on aspects of this work  
661 related to Ca<sup>2+</sup> signaling and for assistance with intrinsic fluorescence experiments. We  
662 also extend heartfelt thanks to Cyril Zipfel (The Sainsbury Laboratory and the University  
663 of Zurich) for critical discussions regarding early observations of the  
664 transphosphorylation between BIK1 and CPK28, and for critically reading this work prior  
665 to submission. We thank Tina Romeis (Halle) for insightful discussions and sharing  
666 published materials (Table S1), as well as Tony Papanicolaou, Ruxandra Bogdan and  
667 Andrew Ji (Queen's University) for their technical assistance, and Darrel Desveaux  
668 (University of Toronto) for providing *Pseudomonas syringae* pv. *tomato* DC3000. We  
669 additionally thank all members of the Monaghan Laboratory for their helpful and critical  
670 feedback of this work.

671

672

673

674

675

676

677

678

679 **FUNDING**

680

681 Research in the Monaghan Laboratory is funded by Discovery and Accelerator Grants  
682 from the Natural Sciences and Engineering Research Council of Canada (NSERC) and  
683 the Canada Research Chair Program, as well as infrastructure support through the John  
684 R Evans Leaders Fund from the the Canadian Foundation for Innovation (CFI) and the  
685 Ontario Ministry of Research and Innovation (MRIS). Research in the Huber Laboratory  
686 was funded by National Science Foundation-IOS Grant 1354094. Research in the  
687 Trujillo Laboratory was funded by German Research Foundation (DFG). Melissa  
688 Bredow is supported by an NSERC Postdoctoral Fellowship, Alexandra Johnson  
689 Dingee was supported by the Queen’s University Summer Work Experience Program,  
690 Danielle Ciren was the recipient of an NSERC Undergraduate Summer Research  
691 Award, and Katherine Dunning was the recipient of an NSERC Canada Graduate  
692 Scholarship for Master’s Students and an NSERC Michael Smith Foreign Study  
693 Supplement to train in the Trujillo Laboratory.

694

695

696

## 697 REFERENCES

698  
699

- 700 1. G. Manning, The Protein Kinase Complement of the Human Genome. *Science* **298**,  
701 1912–1934 (2002).
- 702 2. M. D. Adams, *et al.*, Analysis of the genome sequence of the flowering plant  
703 *Arabidopsis thaliana*. *Nature* **408**, 796–815 (2000).
- 704 3. C. Dardick, J. Chen, T. Richter, S. Ouyang, P. Ronald, The Rice Kinase Database.  
705 A Phylogenomic Database for the Rice Kinome. *Plant Physiol.* **143**, 579–586  
706 (2007).
- 707 4. M. Bredow, J. Monaghan, Regulation of Plant Immune Signaling by Calcium-  
708 Dependent Protein Kinases. *Mol. Plant. Microbe. Interact.* **32**, 6–19 (2019).
- 709 5. L. Sun, J. Zhang, Regulatory role of receptor-like cytoplasmic kinases in early  
710 immune signaling events in plants. *FEMS Microbiol. Rev.* (2020)  
711 <https://doi.org/10.1093/femsre/fuaa035>.
- 712 6. D. Tang, G. Wang, J.-M. Zhou, Receptor Kinases in Plant-Pathogen Interactions:  
713 More Than Pattern Recognition. *Plant Cell* **29**, 618–637 (2017).
- 714 7. J. A. Ubersax, J. E. Ferrell, Mechanisms of specificity in protein phosphorylation.  
715 *Nat. Rev. Mol. Cell Biol.* **8** (2007).
- 716 8. J. Mergner, *et al.*, Mass-spectrometry-based draft of the *Arabidopsis* proteome.  
717 *Nature* **579**, 409–414 (2020).
- 718 9. S. H. Khan, W. A. McLaughlin, R. Kumar, Site-specific phosphorylation regulates  
719 the structure and function of an intrinsically disordered domain of the glucocorticoid  
720 receptor. *Sci. Rep.* **7**, 1–8 (2017).
- 721 10. L. Cobb, S. Koyama, P. Cohen, Site-specific phosphorylation by intracellular  
722 kinases determines the apoptotic activity of IGFBP-3 in prostate cancer. *Cancer*  
723 *Res.* **67**, 4393–4393 (2007).
- 724 11. Z. Chen, *et al.*, Signal-induced site-specific phosphorylation targets I kappa B alpha  
725 to the ubiquitin-proteasome pathway. *Genes Dev.* **9**, 1586–1597 (1995).
- 726 12. Y. U. Ko, *et al.*, Site-specific phosphorylation of Fbxw7 by Cdk5/p25 and its  
727 resulting decreased stability are linked to glutamate-induced excitotoxicity. *Cell*  
728 *Death Dis.* **10**, 1–13 (2019).
- 729 13. C. Marceaux, D. Petit, J. Bertoglio, M. D. David, Phosphorylation of ARHGAP19 by



- 730 CDK1 and ROCK regulates its subcellular localization and function during mitosis.  
731 *J. Cell Sci.* **131** (2018).
- 732 14. E.-A. Balta, *et al.*, Phosphorylation Modulates the Subcellular Localization of  
733 SOX11. *Front. Mol. Neurosci.* **11** (2018).
- 734 15. S. Ying, *et al.*, Regulatory Phosphorylation of Bacterial-Type PEP Carboxylase by  
735 the Ca<sup>2+</sup>-Dependent Protein Kinase RcCDPK1 in Developing Castor Oil Seeds.  
736 *Plant Physiol.* **174**, 1012 (2017).
- 737 16. G. W. L. Eng, Edison, D. M. Virshup, Site-specific phosphorylation of casein kinase  
738 1  $\delta$  (CK1 $\delta$ ) regulates its activity towards the circadian regulator PER2. *PLoS One*  
739 **12**, e0177834 (2017).
- 740 17. S. W. Pedersen, *et al.*, Site-Specific Phosphorylation of PSD-95 PDZ Domains  
741 Reveals Fine-Tuned Regulation of Protein-Protein Interactions. *ACS Chem. Biol.*  
742 **12** (2017).
- 743 18. A. Arif, J. Jia, B. Willard, X. Li, P. L. Fox, Multisite Phosphorylation of S6K1 Directs  
744 a Kinase Phospho-code that Determines Substrate Selection. *Mol. Cell* **73**, 446–  
745 457.e6 (2019).
- 746 19. K. Thor, Calcium—Nutrient and Messenger. *Front. Plant Sci.* **10** (2019).
- 747 20. D. Aldon, M. Mbengue, C. Mazars, J.-P. Galaud, Calcium Signalling in Plant Biotic  
748 Interactions. *Int. J. Mol. Sci.* **19** (2018).
- 749 21. O. Batistič, J. Kudla, Analysis of calcium signaling pathways in plants. *Biochim.*  
750 *Biophys. Acta* **1820** (2012).
- 751 22. S. S. Medvedev, Principles of Calcium Signal Generation and Transduction in Plant  
752 Cells. *Russ. J. Plant Physiol.* **65**, 771–783 (2018).
- 753 23. K. H. Edel, E. Marchadier, C. Brownlee, J. Kudla, A. M. Hetherington, The  
754 Evolution of Calcium-Based Signalling in Plants. *Curr. Biol.* **27**, R667–R679 (2017).
- 755 24. B. Ranty, *et al.*, Calcium Sensors as Key Hubs in Plant Responses to Biotic and  
756 Abiotic Stresses. *Front. Plant Sci.* **7** (2016).
- 757 25. K. W. Bender, R. E. Zielinski, S. C. Huber, Revisiting paradigms of Ca<sup>2+</sup> signaling  
758 protein kinase regulation in plants. *Biochem. J.* **475** (2018).
- 759 26. L.-P. Hamel, J. Sheen, A. Séguin, Ancient signals: comparative genomics of green  
760 plant CDPKs. *Trends Plant Sci.* **19**, 79 (2014).
- 761 27. G. R. Valmonte, K. Arthur, C. M. Higgins, R. M. MacDiarmid, Calcium-Dependent  
762 Protein Kinases in Plants: Evolution, Expression and Function. *Plant Cell Physiol.*

- 763           **55**, 551–569 (2014).
- 764   28. E. M. Hrabak, *et al.*, The Arabidopsis CDPK-SnRK superfamily of protein kinases.  
765       *Plant Physiol.* **132** (2003).
- 766   29. M. Klimecka, G. Muszyńska, Structure and functions of plant calcium-dependent  
767       protein kinases. *Acta Biochim. Pol.* **54** (2007).
- 768   30. M. Boudsocq, M. J. Droillard, L. Regad, C. Laurière, Characterization of  
769       Arabidopsis calcium-dependent protein kinases: activated or not by calcium?  
770       *Biochem. J.* **447** (2012).
- 771   31. A. K. Wernimont, *et al.*, Structures of apicomplexan calcium-dependent protein  
772       kinases reveal mechanism of activation by calcium. *Nat. Struct. Mol. Biol.* **17**, 596  
773       (2010).
- 774   32. A. K. Wernimont, *et al.*, Structures of parasitic CDPK domains point to a common  
775       mechanism of activation. *Proteins* **79** (2011).
- 776   33. J. R. Ingram, *et al.*, Allosteric activation of apicomplexan calcium-dependent protein  
777       kinases. *Proc. Natl. Acad. Sci. U. S. A.* **112**, E4975–E4984 (2015).
- 778   34. T. Guerra, *et al.*, Calcium-dependent protein kinase 5 links calcium signaling with  
779       N-hydroxy-l-pipecolic acid- and SARD1-dependent immune memory in systemic  
780       acquired resistance. *New Phytol.* **225** (2020).
- 781   35. P. Schulz, M. Herde, T. Romeis, Calcium-Dependent Protein Kinases: Hubs in  
782       Plant Stress Signaling and Development. *Plant Physiol.* **163**, 523–530 (2013).
- 783   36. J. S. Marie Boudsocq, CDPKs in immune and stress signaling. *Trends Plant Sci.*  
784       **18**, 30 (2013).
- 785   37. T. Y. Delormel, M. Boudsocq, Properties and functions of calcium-dependent  
786       protein kinases and their relatives in *Arabidopsis thaliana*. *New Phytol.* **224** (2019).
- 787   38. G. I. Arimura, T. Sawasaki, Arabidopsis CPK3 plays extensive roles in various  
788       biological and environmental responses. *Plant Signal. Behav.* **5**, 1263 (2010).
- 789   39. A. Perraki, *et al.*, Phosphocode-dependent functional dichotomy of a common co-  
790       receptor in plant signalling. *Nature* **561**, 248–252 (2018).
- 791   40. Y. Kadota, *et al.*, Quantitative phosphoproteomic analysis reveals common  
792       regulatory mechanisms between effector- and PAMP-triggered immunity in plants.  
793       *New Phytol.* **221** (2019).
- 794   41. J. J. Benschop, *et al.*, Quantitative Phosphoproteomics of Early Elicitor Signaling in  
795       Arabidopsis. *Mol. Cell. Proteomics* **6**, 1198–1214 (2007).

- 796 42. B. Mattei, F. Spinelli, D. Pontiggia, G. De Lorenzo, Comprehensive Analysis of the  
797 Membrane Phosphoproteome Regulated by Oligogalacturonides in Arabidopsis  
798 thaliana. *Front. Plant Sci.* **7** (2016).
- 799 43. N. Rayapuram, *et al.*, Quantitative Phosphoproteomic Analysis Reveals Shared  
800 and Specific Targets of Arabidopsis Mitogen-Activated Protein Kinases (MAPKs)  
801 MPK3, MPK4, and MPK6. *Mol. Cell. Proteomics* **17**, 61 (2018).
- 802 44. N. Rayapuram, *et al.*, Identification of novel PAMP-triggered phosphorylation and  
803 dephosphorylation events in Arabidopsis thaliana by quantitative phosphoproteomic  
804 analysis. *J. Proteome Res.* **13** (2014).
- 805 45. C.-P. Witte, *et al.*, Tobacco calcium-dependent protein kinases are differentially  
806 phosphorylated in vivo as part of a kinase cascade that regulates stress response.  
807 *J. Biol. Chem.* **285**, 9740–9748 (2010).
- 808 46. T. S. Nühse, A. Stensballe, O. N. Jensen, S. C. Peck, Phosphoproteomics of the  
809 Arabidopsis Plasma Membrane and a New Phosphorylation Site Database. *The*  
810 *Plant Cell* **16**, 2394–2405 (2004).
- 811 47. S. de la Fuente van Bentem, *et al.*, Site-specific phosphorylation profiling of  
812 Arabidopsis proteins by mass spectrometry and peptide chip analysis. *J. Proteome*  
813 *Res.* **7**, 2458–2470 (2008).
- 814 48. J. Monaghan, S. Matschi, T. Romeis, C. Zipfel, The calcium-dependent protein  
815 kinase CPK28 negatively regulates the BIK1-mediated PAMP-induced calcium  
816 burst. *Plant Signal. Behav.* **10** (2015).
- 817 49. J. Wang, *et al.*, A Regulatory Module Controlling Homeostasis of a Plant Immune  
818 Kinase. *Mol. Cell* **69** (2018).
- 819 50. J. Monaghan, *et al.*, The Calcium-Dependent Protein Kinase CPK28 Buffers Plant  
820 Immunity and Regulates BIK1 Turnover. *Cell Host Microbe* **16**, 605–615 (2014).
- 821 51. S. Matschi, *et al.*, Function of calcium-dependent protein kinase CPK28 of  
822 Arabidopsis thaliana in plant stem elongation and vascular development. *Plant J.*  
823 **73** (2013).
- 824 52. S. Matschi, K. Hake, M. Herde, B. Hause, T. Romeis, The Calcium-Dependent  
825 Protein Kinase CPK28 Regulates Development by Inducing Growth Phase-  
826 Specific, Spatially Restricted Alterations in Jasmonic Acid Levels Independent of  
827 Defense Responses in Arabidopsis. *Plant Cell* **27**, 591 (2015).
- 828 53. K. W. Bender, *et al.*, Autophosphorylation-based Calcium (Ca<sup>2+</sup>) Sensitivity  
829 Priming and Ca<sup>2+</sup>/Calmodulin Inhibition of Arabidopsis thaliana Ca<sup>2+</sup>-dependent  
830 Protein Kinase 28 (CPK28). *J. Biol. Chem.* **292** (2017).

- 831 54. A. D. Hegeman, *et al.*, A phyloproteomic characterization of in vitro  
832 autophosphorylation in calcium-dependent protein kinases. *Proteomics* **6** (2006).
- 833 55. K. N. Swatek, R. S. Wilson, N. Ahsan, R. L. Tritz, J. J. Thelen, Multisite  
834 phosphorylation of 14-3-3 proteins by calcium-dependent protein kinases. *Biochem.*  
835 *J.* **459**, 15 (2014).
- 836 56. J. Beenstock, N. Mooshayef, D. Engelberg, How Do Protein Kinases Take a Selfie  
837 (Autophosphorylate)? *Trends Biochem. Sci.* **41** (2016).
- 838 57. D. Lu, *et al.*, A receptor-like cytoplasmic kinase, BIK1, associates with a flagellin  
839 receptor complex to initiate plant innate immunity. *Proc. Natl. Acad. Sci. U. S. A.*  
840 **107**, 496–501 (2010).
- 841 58. D. Couto, *et al.*, The Arabidopsis Protein Phosphatase PP2C38 Negatively  
842 Regulates the Central Immune Kinase BIK1. *PLoS Pathog.* **12**, e1005811 (2016).
- 843 59. W. Lin, *et al.*, Tyrosine phosphorylation of protein kinase complex BAK1/BIK1  
844 mediates Arabidopsis innate immunity. *Proc. Natl. Acad. Sci. U. S. A.* **111**, 3632–  
845 3637 (2014).
- 846 60. N. K. Lal, *et al.*, The Receptor-like Cytoplasmic Kinase BIK1 Localizes to the  
847 Nucleus and Regulates Defense Hormone Expression during Plant Innate  
848 Immunity. *Cell Host Microbe* **23**, 485–497.e5 (2018).
- 849 61. J. Xu, *et al.*, Identification and functional analysis of phosphorylation residues of the  
850 Arabidopsis BOTRYTIS-INDUCED KINASE1. *Protein Cell* **4**, 771–781 (2013).
- 851 62. X. Ma, *et al.*, Ligand-induced monoubiquitination of BIK1 regulates plant immunity.  
852 *Nature* **581**, 199–203 (2020).
- 853 63. X. Liang, *et al.*, Arabidopsis heterotrimeric G proteins regulate immunity by directly  
854 coupling to the FLS2 receptor. *eLife* **5**, e13568 (2016).
- 855 64. J. Wang, *et al.*, The Kinase OsCPK4 Regulates a Buffering Mechanism That Fine-  
856 Tunes Innate Immunity. *Plant Physiol.* **176**, 1835–1849 (2018).
- 857 65. J. Zhang, *et al.*, Receptor-like cytoplasmic kinases integrate signaling from multiple  
858 plant immune receptors and are targeted by a *Pseudomonas syringae* effector. *Cell*  
859 *Host Microbe* **7**, 290–301 (2010).
- 860 66. S. Ranf, *et al.*, Microbe-associated molecular pattern-induced calcium signaling  
861 requires the receptor-like cytoplasmic kinases, PBL1 and BIK1. *BMC Plant Biol.* **14**,  
862 374 (2014).
- 863 67. Z. Liu, *et al.*, BIK1 interacts with PEPRs to mediate ethylene-induced immunity.  
864 *Proc. Natl. Acad. Sci. U. S. A.* **110**, 6205–6210 (2013).

- 865 68. J. T. Vivian, P. R. Callis, Mechanisms of tryptophan fluorescence shifts in proteins.  
866 *Biophys. J.* **80**, 2093–2109 (2001).
- 867 69. A. Liese, T. Romeis, Biochemical regulation of in vivo function of plant calcium-  
868 dependent protein kinases (CDPK). *Biochim. Biophys. Acta* **1833**, 1582–1589  
869 (2013).
- 870 70. D. Geiger, *et al.*, Guard cell anion channel SLAC1 is regulated by CDPK protein  
871 kinases with distinct Ca<sup>2+</sup> affinities. *Proc. Natl. Acad. Sci. U. S. A.* **107**, 8023–8028  
872 (2010).
- 873 71. C. N. Kanchiswamy, *et al.*, Regulation of Arabidopsis defense responses against  
874 *Spodoptera littoralis* by CPK-mediated calcium signaling. *BMC Plant Biol.* **10**, 97  
875 (2010).
- 876 72. P. Saha, M. Singh, Characterization of a winged bean (*Psophocarpus*  
877 *tetragonolobus*) protein kinase with calmodulin-like domain: regulation by  
878 autophosphorylation. *Biochem. J* **305 ( Pt 1)**, 205–210 (1995).
- 879 73. S. Chaudhuri, A. Seal, M. D. Gupta, Autophosphorylation-dependent activation of a  
880 calcium-dependent protein kinase from groundnut. *Plant Physiol.* **120**, 859–866  
881 (1999).
- 882 74. E. W. Chehab, O. R. Patharkar, A. D. Hegeman, T. Taybi, J. C. Cushman,  
883 Autophosphorylation and subcellular localization dynamics of a salt- and water  
884 deficit-induced calcium-dependent protein kinase from ice plant. *Plant Physiol.* **135**,  
885 1430–1446 (2004).
- 886 75. T. Ito, S. Ishida, S. Oe, J. Fukazawa, Y. Takahashi, Autophosphorylation Affects  
887 Substrate-Binding Affinity of Tobacco Ca<sup>2+</sup>-Dependent Protein Kinase1. *Plant*  
888 *Physiol.* **174**, 2457–2468 (2017).
- 889 76. M.-H. Oh, *et al.*, CDPKs are dual-specificity protein kinases and tyrosine  
890 autophosphorylation attenuates kinase activity. *FEBS Letters* **586**, 4070–4075  
891 (2012).
- 892 77. S. Asai, *et al.*, The variable domain of a plant calcium-dependent protein kinase  
893 (CDPK) confers subcellular localization and substrate recognition for NADPH  
894 oxidase. *J. Biol. Chem.* **288**, 14332–14340 (2013).
- 895 78. A. Sente, *et al.*, Molecular mechanism of modulating arrestin conformation by  
896 GPCR phosphorylation. *Nat. Struct. Mol. Biol.* **25**, 538–545 (2018).
- 897 79. N. A. Jonniya, M. F. Sk, P. Kar, Investigating Phosphorylation-Induced  
898 Conformational Changes in WNK1 Kinase by Molecular Dynamics Simulations.  
899 *ACS Omega* **4**, 17404–17416 (2019).

- 900 80. C. M. Schworer, R. J. Colbran, J. R. Keefer, T. R. Soderling, Ca<sup>2+</sup>/calmodulin-  
901 dependent protein kinase II. Identification of a regulatory autophosphorylation site  
902 adjacent to the inhibitory and calmodulin-binding domains. *J. Biol. Chem.* **263**,  
903 13486–13489 (1988).
- 904 81. S. Ohsako, H. Nakazawa, S.-I. Sekihara, A. Ikai, T. Yamauchi, Role of Threonine-  
905 286 as Autophosphorylation Site for Appearance of Ca<sup>2+</sup>-Independent Activity of  
906 Calmodulin-Dependent Protein Kinase II  $\alpha$  Subunit1. *The Journal of Biochemistry*  
907 **109**, 137–143 (1991).
- 908 82. J. Monaghan, Conserved Degradation of Orthologous RLCKs Regulates Immune  
909 Homeostasis. *Trends in Plant Science* **23**, 554–557 (2018).
- 910 83. U. Dubiella, *et al.*, Calcium-dependent protein kinase/NADPH oxidase activation  
911 circuit is required for rapid defense signal propagation. *Proc. Natl. Acad. Sci. U. S.*  
912 *A.* **110**, 8744–8749 (2013).
- 913 84. M. J. Marcec, S. Gilroy, B. W. Poovaiah, K. Tanaka, Mutual interplay of Ca and  
914 ROS signaling in plant immune response. *Plant Sci.* **283**, 343–354 (2019).
- 915 85. K. Dressano, *et al.*, Dynamic regulation of Pep-induced immunity through post-  
916 translational control of defence transcript splicing. *Nature Plants* **6**, 1008–1019  
917 (2020).
- 918 86. B. Jeremie, *et al.*, Role of MPK4 in pathogen-associated molecular pattern-  
919 triggered alternative splicing in Arabidopsis <https://doi.org/10.1101/511980>.
- 920 87. L. Wirthmueller, T. Romeis, Splicing up PepR signalling. *Nat Plants* (2020)  
921 <https://doi.org/10.1038/s41477-020-0708-1>.
- 922 88. J. Wang, X. Long, M. Chern, X. Chen, Understanding the molecular mechanisms of  
923 trade-offs between plant growth and immunity. *Sci. China Life Sci.* (2020)  
924 <https://doi.org/10.1007/s11427-020-1719-y>.
- 925 89. T. L. Karasov, E. Chae, J. J. Herman, J. Bergelson, Mechanisms to Mitigate the  
926 Trade-Off between Growth and Defense. *Plant Cell* **29**, 666–680 (2017).
- 927 90. L. Gómez-Gómez, G. Felix, T. Boller, A single locus determines sensitivity to  
928 bacterial flagellin in Arabidopsis thaliana. *Plant J.* **18**, 277–284 (1999).
- 929 91. R. van Wersch, X. Li, Y. Zhang, Mighty Dwarfs: Arabidopsis Autoimmune Mutants  
930 and Their Usages in Genetic Dissection of Plant Immunity. *Frontiers in Plant*  
931 *Science* **7** (2016).
- 932 92. X. Li, J. D. Clarke, Y. Zhang, X. Dong, Activation of an EDS1-mediated R-gene  
933 pathway in the *snc1* mutant leads to constitutive, NPR1-independent pathogen

- 934 resistance. *Mol. Plant. Microbe. Interact.* **14**, 1131–1139 (2001).
- 935 93. C. Morita-Yamamuro, *et al.*, The Arabidopsis gene CAD1 controls programmed cell  
936 death in the plant immune system and encodes a protein containing a MACPF  
937 domain. *Plant Cell Physiol.* **46**, 902–912 (2005).
- 938 94. S. Campo, *et al.*, Overexpression of a Calcium-Dependent Protein Kinase Confers  
939 Salt and Drought Tolerance in Rice by Preventing Membrane Lipid Peroxidation.  
940 *Plant Physiol.* **165** (2014).
- 941 95. M. Bundó, M. Coca, Calcium-dependent protein kinase OsCPK10 mediates both  
942 drought tolerance and blast disease resistance in rice plants. *J. Exp. Bot.* **68**, 2963–  
943 2975 (2017).
- 944 96. C. Hettenhausen, D.-H. Yang, I. T. Baldwin, J. Wu, Calcium-dependent protein  
945 kinases, CDPK4 and CDPK5, affect early steps of jasmonic acid biosynthesis in  
946 *Nicotiana attenuata*. *Plant Signal. Behav.* **8**, e22784 (2013).
- 947 97. X. Zhang, R. Henriques, S.-S. Lin, Q.-W. Niu, N.-H. Chua, Agrobacterium-mediated  
948 transformation of *Arabidopsis thaliana* using the floral dip method. *Nat. Protoc.* **1**,  
949 641–646 (2006).
- 950 98. R. P. Hellens, E. A. Edwards, N. R. Leyland, S. Bean, P. M. Mullineaux, pGreen: a  
951 versatile and flexible binary Ti vector for *Agrobacterium*-mediated plant  
952 transformation. *Plant Mol. Biol.* **42** (2000).
- 953 99. A. Huffaker, G. Pearce, C. A. Ryan, An endogenous peptide signal in *Arabidopsis*  
954 activates components of the innate immune response. *Proc. Natl. Acad. Sci. U. S.*  
955 *A.* **103**, 10098–10103 (2006).
- 956 100. G. Kunze, *et al.*, The N Terminus of Bacterial Elongation Factor Tu Elicits Innate  
957 Immunity in *Arabidopsis* Plants. *Plant Cell* **16**, 3496 (2004).
- 958 101. M. Bredow, I. Sementchoukova, K. Siegel, J. Monaghan, Pattern-Triggered  
959 Oxidative Burst and Seedling Growth Inhibition Assays in *Arabidopsis thaliana*. *J.*  
960 *Vis. Exp.* (2019) <https://doi.org/10.3791/59437>.
- 961 102. D. M. Bers, C. W. Patton, R. Nuccitelli, A practical guide to the preparation of  
962 Ca(2+) buffers. *Methods Cell Biol.* **99**, 1–26 (2010).
- 963 103. G. E. Crooks, WebLogo: A Sequence Logo Generator. *Genome Research* **14**,  
964 1188–1190 (2004).
- 965 104. L. A. Kelley, S. Mezulis, C. M. Yates, M. N. Wass, M. J. E. Sternberg, The Phyre2  
966 web portal for protein modeling, prediction and analysis. *Nat. Protoc.* **10**, 845–858  
967 (2015).

## SUPPLEMENTARY DATA

|                    |             | Ser228               | Ser318                | Ser495               |
|--------------------|-------------|----------------------|-----------------------|----------------------|
| AT4G36070.2        | (AtCPK18)   | QDIVG <b>S</b> AYYVA | AAQAL <b>S</b> HSHWVK | EDGRI <b>S</b> INEFR |
| KF169738           | (BnaCDPK18) | QDIVG <b>S</b> AYYVA | AAQAL <b>S</b> HSHWVR | EDGRI <b>S</b> IHEFR |
| Bradi3g02600       | (BdCDPK17)  | RDIVG <b>S</b> AYYVA | AAQAL <b>S</b> HPPWVR | KDGRI <b>S</b> LSEFR |
| GRMZM2G157068      | (ZmCDPK22)  | HDIVG <b>S</b> AYYVA | AAQAL <b>S</b> HPPWVR | KDGKI <b>S</b> LSEFR |
| GRMZM2G053868      | (ZmCDPK40)  | HDIVG <b>S</b> AYYVA | AAQAL <b>S</b> HPPWVR | KDGKI <b>S</b> LSEFR |
| Os02g0126400       | (OsCDPK4)   | HDIVG <b>S</b> AYYVA | AAQAL <b>S</b> HPPWVR | KDGRI <b>S</b> LSEFR |
| AT2G17890.1        | (AtCPK16)   | HDIVG <b>S</b> AYYVA | AAQAL <b>S</b> HPPWVR | NDGKI <b>S</b> LQEFR |
| GRMZM2G365035      | (ZmCDPK33)  | RDIVG <b>S</b> AYYVA | AAQAL <b>S</b> HDWVR  | KDGKI <b>S</b> LDEFR |
| Bradi1g52567       | (BdCDPK07)  | RDIVG <b>S</b> AYYVA | AAQAL <b>S</b> HEWVR  | KDGKI <b>S</b> LDEFR |
| Os07g0409900       | (OsCPK18)   | RDIVG <b>S</b> AYYVA | AAQAL <b>S</b> HEWVR  | RDGKI <b>S</b> LDEFR |
| AT5G66210.2        | (AtCPK28)   | HDIVG <b>S</b> AYYVA | AAQAL <b>S</b> HAWVR  | RDGKI <b>S</b> LHEFR |
| JX122909           | (BnaCDPK28) | HDIVG <b>S</b> AYYVA | ASQAL <b>S</b> HAWVR  | RDGKI <b>S</b> LHEFR |
| Solyc02g083850.2.1 | (SlCDPK28)  | QDIVG <b>S</b> AYYVA | AAQAL <b>S</b> HPPWVR | KDGKI <b>S</b> LSEFR |
| Solyc03g033540.2.1 | (SlCDPK29)  | QDIVG <b>S</b> AYYVA | AAQAL <b>S</b> HPPWVR | KDGKI <b>S</b> ISEFR |
| VIT_04s0023g03420  | (VvCPK3)    | QDIVG <b>S</b> AYYVA | AAQAL <b>S</b> HPPWVR | KDGRI <b>S</b> LAEFR |
| Glyma02g05440      | (GmCPK3)    | HDIVG <b>S</b> AYYVA | AAQGL <b>S</b> HPPWVR | KDGKI <b>S</b> LPEFR |
| Glyma16g23870      | (GmCPK31)   | HDIVG <b>S</b> AYYVA | AAQAL <b>S</b> HPPWVR | KDGKI <b>S</b> LPEFR |
| Glyma11g08180      | (GmCPK24)   | QDIVG <b>S</b> AYYVA | AAQAL <b>S</b> HPPWVR | KDGKI <b>S</b> LPEFR |
| Glyma01g37100      | (GmCPK1)    | QDIVG <b>S</b> AYYVA | AAQAL <b>S</b> HPPWVR | KDGKI <b>S</b> LPEFR |
| Sm0164119          | (SmCPK28)   | HDIVG <b>S</b> AYYVA | AAQAL <b>S</b> HPPWVR | GDGRI <b>S</b> LREFQ |
| Contig_10120       | (MpCPK28)   | QDVVG <b>S</b> AYYVA | ASQAL <b>S</b> HPPWVR | GDGRI <b>S</b> LPEFQ |
| Sm092726           | (SmCPK18)   | HDVVG <b>S</b> AYYVA | AAQAL <b>S</b> HPPWVR | GDGRI <b>S</b> LAEFQ |
| Pp1s83_172V6       |             | RDVVG <b>S</b> AYYVA | AAQAL <b>S</b> HPPWVK | KDGRI <b>S</b> LSEFQ |
| Pp1s370_37V6       |             | GDVVG <b>S</b> AYYVA | AAQAL <b>S</b> HPPWVK | GDKRI <b>S</b> LPEFQ |
| Pp1s83_8V6         |             | QDVVG <b>S</b> AYYVA | AAQAL <b>S</b> HPPWAK | GDGRI <b>S</b> LPEFQ |
| Pp1s199_57V6       |             | HDVVG <b>S</b> AYYVA | AAQAL <b>S</b> HPPWAK | GDGKI <b>S</b> LSEFQ |
|                    |             | *:*****              | **:*.*****.:          | * :*: :*             |

**Figure S1. Ser228, Ser318 and Ser495 are conserved across group IV CDPKs.** Amino acid sequences of representative group IV CDPKs from eudicots (*Arabidopsis thaliana*, *Glycine max*, *Solanum lycopersicum*, *Vitis vinifera* and *Brassica napus*), monocots (*Brachypodium distachyon*, *Zea mays*, and *Oryza sativa*), bryophytes (*Psychomiteralla patens*), liverworts (*Marchantia polymorpha*), and pteridophytes (*Selaginella moellendorffii*) were aligned using Clustal Omega Multiple Sequence Alignment Tool and the residues corresponding to positions 228, 318, and 495 of *Arabidopsis thaliana* CPK28 were compared. “\*”=perfect alignment; “:”=strong similarity; “.”=weak similarity.



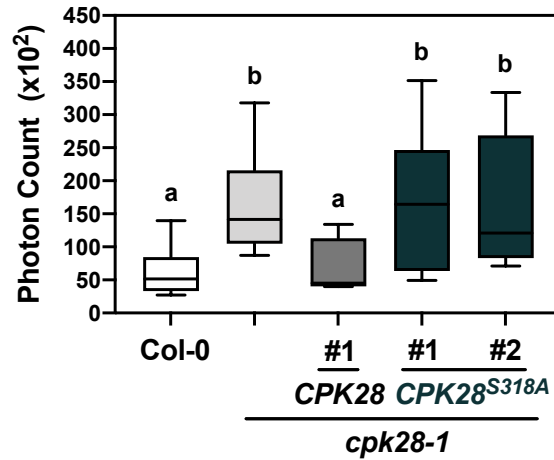

**Figure S2. CPK28<sup>S318A</sup> does not complement *cpk28-1* in response to elf18 treatment.** Oxidative bursts of Col-0, *cpk28-1*, *cpk28-1/pCPK28:CPK28-FLAG*, and *cpk28-1/pCPK28:CPK28<sup>S318A</sup>-FLAG* lines following continual growth in elf18 (100 nM) for 12 days (n=6). Values are presented as boxplots indicating first and third quartiles, split by a median line, and whiskers representing maximum and minimum values. Statistically different groups (p<0.005) are indicated with lowercase letters, as determined by ANOVA analysis followed by Tukey's posthoc test. Experiments were conducted three times with similar results.

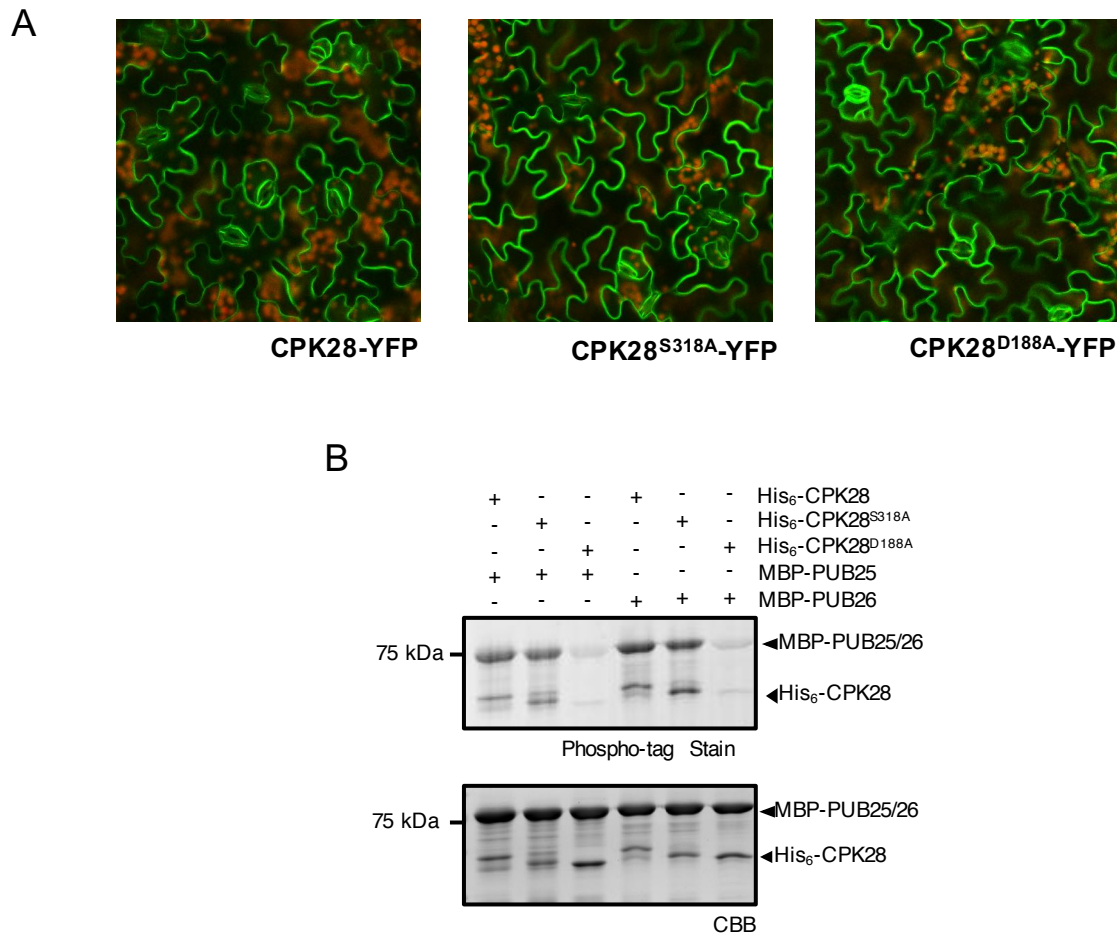

**Figure S3. CPK28<sup>S318A</sup> localizes to the plasma membrane and phosphorylates PUB25 and PUB26.** (A) Subcellular localization of CPK28-YFP, CPK28<sup>S318A</sup>-YFP, and CPK28<sup>D188A</sup>-YFP stably expressed under the CaMV 35S promoter in *cpk28-1* mutants. Imaging was performed using a LSM 710 (Zeiss) confocal microscope with excitation at 488 nm for yellow fluorescent protein (YFP; coloured green) and a range of 510-540 nm for measuring emission. Chlorophyll autofluorescence (coloured red) was detected with an excitation wavelength of 543 nm and an emission wavelength range of 680-760 nm. (B) Phospho-tag gel stain of *in vitro* kinase assay using recombinantly produced His<sub>6</sub>-CPK28, His<sub>6</sub>-CPK28<sup>S318A</sup>, or His<sub>6</sub>-CPK28<sup>D188A</sup> and MBP-PUB25 or MBP-PUB26. Gels were stained with Coomassie Brilliant Blue (CBB) to assess loading. Experiments were conducted at least three times with similar results.

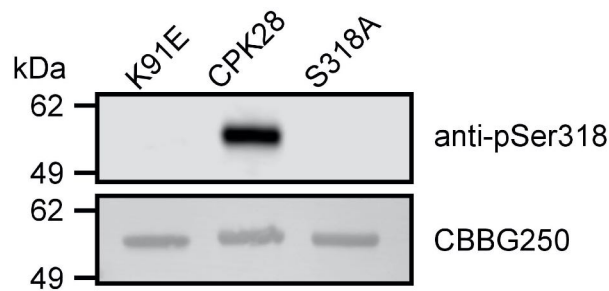

**Figure S4. Specificity of the  $\alpha$ -pSer318 antibody.** Specificity of the CPK28 pSer318 antibody was determined by immunoblotting against wildtype (CPK28), kinase-dead (CPK28<sup>K91E</sup>), or CPK28<sup>S318A</sup>. 200 ng of *in situ* phosphorylated purified recombinant protein was separated by gel electrophoresis and blotted to a PVDF membrane before probing with 2  $\mu$ g/ml anti-CPK28 pSer318 IgGs. Only the wildtype protein was detected, demonstrating specificity of the antibody for the pSer318 site. Gels were stained with Coomassie Brilliant Blue (CBBG250) to assess loading. Experiments were conducted twice with similar results.

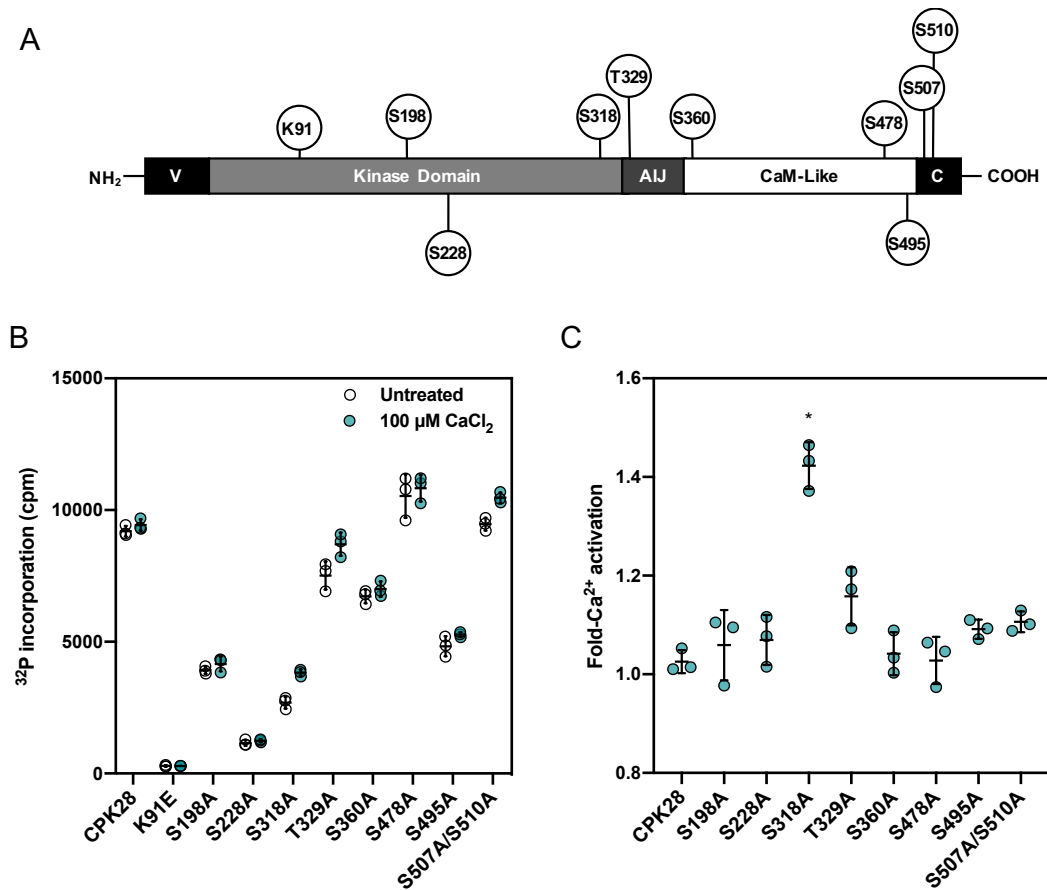

**Figure S5. Ser318 phosphorylation uniquely primes CPK28 for Ca<sup>2+</sup>-activation.** (A) Position of tested phosphorylation sites across CPK28 protein domains. (B) Biochemical screen of CPK28 phospho-null mutants for Ca<sup>2+</sup> activation of peptide kinase activity using the ACSM+1 peptide as substrate. Activity was assessed using *in situ* phosphorylated purified recombinant proteins at either background (open circles) or 100 μM CaCl<sub>2</sub> (teal circles) and is shown as <sup>32</sup>P incorporation in cpm. Individual data points (three technical replicates) are shown with mean and standard deviation. (C) Fold-activation of CPK28 phospho-null mutants by the addition of excess Ca<sup>2+</sup> derived from data shown in (B). No difference is observed for wildtype CPK28 between these two conditions and only the S318A site-directed mutants showed statistically significant activation by Ca<sup>2+</sup> (Kruskal-Wallis ANOVA,  $p = 0.024361$ ,  $n = 3$  technical replicates). The screen with all phospho-site mutants was performed once and S318A was selected for confirmation of altered calcium sensitivity.

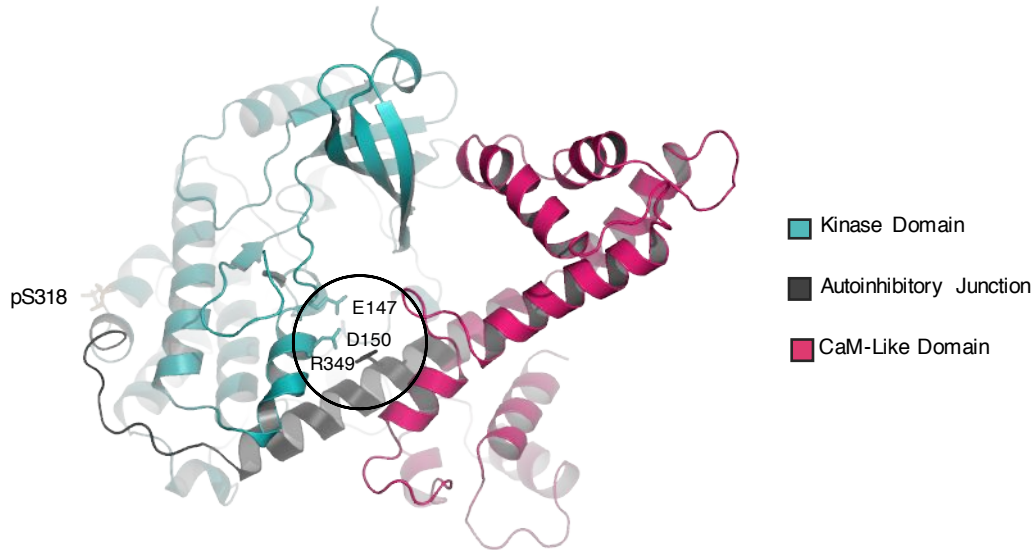

**Figure S6. Structural modeling of CPK28.** A model for CPK28 was generated using the PHYRE2.0 Protein Recognition Server (104) with inactive TgCDPK1 (iTgCDPK1; 3KU2) as a template (95% confidence score). Phosphorylated Ser318 is indicated in orange. The residues in the autoinhibitory triad that stabilizes TgCDPK1 (Lys338-Glu135-Asp138) (31), corresponding to Arg349-Glu147-Asp150 in CPK28, are labelled. CPK28 was visualized using the PyMOL Molecular Graphics System, Version 2.0 Schrödinger, LLC with PyTMs legacy add-on for post-translational modifications.

**Table S1. List of germplasm, constructs, and primers used in this study.**

| Germplasm                                      |                                                                                                                                                                                                                      |
|------------------------------------------------|----------------------------------------------------------------------------------------------------------------------------------------------------------------------------------------------------------------------|
| Genotype                                       | Reference                                                                                                                                                                                                            |
| <i>cpk28-1</i>                                 | Matschi et al., 2012                                                                                                                                                                                                 |
| <i>bik1</i>                                    | Zhang et al., 2010                                                                                                                                                                                                   |
| <i>bik1 pbl1</i>                               | Zhang et al., 2010                                                                                                                                                                                                   |
| <i>cpk28-1 bik1 pbl1</i>                       | This study                                                                                                                                                                                                           |
| <i>cpk28-1/pCPK28:CPK28-FLAG</i> line #1       | This study                                                                                                                                                                                                           |
| <i>cpk28-1/pCPK28:CPK28-S228A-FLAG</i> line #3 | This study                                                                                                                                                                                                           |
| <i>cpk28-1/pCPK28:CPK28-S228A-FLAG</i> line #6 | This study                                                                                                                                                                                                           |
| <i>cpk28-1/pCPK28:CPK28-S318A-FLAG</i> line #1 | This study                                                                                                                                                                                                           |
| <i>cpk28-1/pCPK28:CPK28-S318A-FLAG</i> line #2 | This study                                                                                                                                                                                                           |
| <i>cpk28-1/pCPK28:CPK28-S495A-FLAG</i> line #1 | This study                                                                                                                                                                                                           |
| <i>cpk28-1/pCPK28:CPK28-S495A-FLAG</i> line #2 | This study                                                                                                                                                                                                           |
| <i>cpk28-1/pCPK28:CPK28-S318D-FLAG</i> line #2 | This study                                                                                                                                                                                                           |
| <i>cpk28-1/pCPK28:CPK28-S318D-FLAG</i> line #3 | This study                                                                                                                                                                                                           |
| <i>cpk28-1/35S:CPK28-YFP</i>                   | Matschi et al., 2012                                                                                                                                                                                                 |
| <i>cpk28-1/35S:CPK28-D188A-YFP</i>             | Matschi et al., 2012                                                                                                                                                                                                 |
| <i>cpk28-1/35S:CPK28-S318A-YFP</i>             | Matschi et al., 2012                                                                                                                                                                                                 |
|                                                |                                                                                                                                                                                                                      |
| Constructs                                     |                                                                                                                                                                                                                      |
| Construct name                                 | Primers used (5'-3') or Reference                                                                                                                                                                                    |
| pRZ949-pCPK28:CPK28-FLAG                       | Promoter: FW: 5'-atcgGGTACCggggcagcaggaagcaactc-3' RV: 5'-atcgCCATGGggctctgatcgaatcgagaag-3'<br>CDS cloning: FW: 5'-actgCCATGGGTGTCTGTTTCCGCCATTAG-3' RV: 5'-atcgGGATCCCTACTATCATCATCATCCTTGTAAATCGAAGATTCCGTGACC-3' |
| pET28a(+)-T7:His6-CPK28                        | Bender et al., 2017                                                                                                                                                                                                  |
| pET28a(+)-T7:His6-CPK28-K91E                   | Bender et al., 2017                                                                                                                                                                                                  |
| pRZ949-pCPK28:CPK28-S228A-FLAG                 | FW: 5'-CATTGTTGGTgagCCATTATGTG-3' RV: 5'-TCATGGAACCTTTTCCCTG-3'                                                                                                                                                      |
| pET28a(+)-T7:His6-CPK28-S228A                  | FW: 5'-CATTGTTGGTgagCCATTATGTG-3' RV: 5'-TCATGGAACCTTTTCCCTG-3'                                                                                                                                                      |
| pRZ949-pCPK28:CPK28-S318A-FLAG                 | FW: 5'-GCTGCACAAGCACTAGCACATGCGTGGGTTAGAGAAGGGCGGAATGC-3' RV: 5'-GCAITCCCCTTCTCTAACCCACGCATGTGCTAGTGTGTCAGC-3'                                                                                                       |
| pET28a(+)-T7:His6-CPK28-S318A                  | FW: 5'-GCTGCACAAGCACTAGCACATGCGTGGGTTAGAGAAGGGCGGAATGC-3' RV: 5'-GCAITCCCCTTCTCTAACCCACGCATGTGCTAGTGTGTCAGC-3'                                                                                                       |
| pRZ949-pCPK28:CPK28-S495A-FLAG                 | FW: 5'-GAGATGGGAAAAATAGCCCTGCATGAGTTCA-3' RV: 5'-TGAACCTATGCAGGGCTATTTCCCATCTC-3'                                                                                                                                    |
| pET28a(+)-T7:His6-CPK28-S495A                  | FW: 5'-GAGATGGGAAAAATAGCCCTGCATGAGTTCA-3' RV: 5'-TGAACCTATGCAGGGCTATTTCCCATCTC-3'                                                                                                                                    |
| pET28a(+)-T7:His6-CPK28-D188A                  | FW: 5'-GTCTGTACATAGAGCTATGAAACCAGAGA-3' RV: 5'-TCTCTGGTTTCATAGCTCTATGTACAAGAC-3'                                                                                                                                     |
| pRZ949-pCPK28:CPK28-S318D-FLAG                 | FW: 5'-ACAAGCACTAgacCATGCGTGGGTTAGAGAAGG-3' RV: 5'-GCAGCAGTTAGCCGTGC-3'                                                                                                                                              |
| pET28a(+)-T7:His6-CPK28-S198A                  | FW: 5'-GAAACCAGAGAACTTTTGTTCAAAGCAGCTCAACTAGATTCCGCTCTAAAGG-3' RV: 5'-CCTTTAGAGGGCAATCTAGTTGAGCTGCTTTGAACAAAAAGTTCTCTGTTTC-3'                                                                                        |
| pET28a(+)-T7:His6-CPK28-T329A                  | FW: 5'-GGGTAGAGAAGGGCGGAATGCTGCTGATATCCCTGTCGACATTTTCAGTTC-3' RV: 5'-GAACTGAAATGTCGACAGGGATATCAGCAGCATTCCCGCTTCTTAACCC-3'                                                                                            |
| pET28a(+)-T7:His6-CPK28-S360A                  | FW: 5'-CAATTGCTTTAAGGGCGCTTGCTGCCACACTTGACGAGGAGAGATCTC-3' RV: 5'-GAGATCTCTGCCCTGTCAGTGTGGCAGCAAGCGCCCTTAAAGCAAATG-3'                                                                                                |
| pET28a(+)-T7:His6-CPK28-S478A                  | FW: 5'-GAATGCACACGGGGTTAAGAGGAGCAATAGATCCACTGCTGGATGAAGC-3' RV: 5'-GCTTCATCCAGCAGTGGATCTATTGCTCTTAAACCCGTGTGCAATC-3'                                                                                                 |
| pET28a(+)-T7:His6-CPK28-S507A/S510A            | FW: 5'-GTTTCAGGAGACTTCTAAGAACAGCGGGCCATAAGTGCACAGAGAGCACCAGCC-3' RV: 5'-GGGCTTGGTGTCTCTGTGCACTTATGGCCGCTGTTTAGAAGTCTCCTGTA                                                                                           |
| pMAL-c2x:MBP-PUB25                             | FW: 5'-AATCTCTAGAATGCC TAGGAATATAGAACC-3' RV: 5'-GATTCTGCAGTCAAAAAGGGGCCACTTGG-3'                                                                                                                                    |
| pMAL-c2x:MBP-PUB26                             | FW: 5'-AATCTCTAGAATGCCGGGGAAATTAGAGCC-3' RV: 5'-GATTCTGCAGTCAAAAAGGGGCCACTTGG-3'                                                                                                                                     |
| pGex6.1-T7:GST-BIK1                            | FW: 5'-TCGAGCGGGCCGATCTGTGACATGGGTTCTTGTTCAGTTC-3' RV: 5'-GCGAGGCAGATCGTCACTACACAAGGTGCTGCCAAAAAG-3'                                                                                                                 |
| pGex6.1-T7:GST-BIK1-K105A/K106A                | FW: 5'-TCGAGCGGGCCGATCTGTGACATGGGTTCTTGTTCAGTTC-3' RV: 5'-GCGAGGCAGATCGTCACTACACAAGGTGCTGCCAAAAAG-3'                                                                                                                 |
| pXC5G-35S:CPK28-YFP                            | Matschi et al., 2012                                                                                                                                                                                                 |
| pXC5G-35S:CPK28-D188A-YFP                      | Matschi et al., 2012                                                                                                                                                                                                 |
| pXC5G-35S:CPK28-S318A-YFP                      | Matschi et al., 2012                                                                                                                                                                                                 |

## File S1. Amino acid sequences of group IV CDPKs across the plant lineage.

This text file includes all FASTA-formatted sequences retrieved following a query for group IV CDPKs using the Phytozome 12 BLAST tool (114 sequences from 53 species).

```
>164119 Org_Smoellendorffii peptide: 164119 (1 of 2) PTHR24349:SF87 - CALCIUM-DEPENDENT PROTEIN KINASE
16-RELATED (PAC:15408038)
MGICFSADKSEKAEKEKNKKHGDHAAKDQVKNKEQRSKNQSAHVPLGKRTNFGYGRDFQAKYKLGKLLGHGQFGYTYAATKIGSGENAVVKRIEKKKML
LPISVEDVRREVRILQLLSGHENVVQFYASFEDDDYVYIVMELCEGGELLDRIILSKKNGCYSEKDAAELVRQMLKVVARCHLHGTVHRDLKPFENFLKFSQ
RDNTPLKATDFGLSDFIRPGRRFHDIVGSAYYVAPEVLKRRSGPESDVWSIGVITYILLCGRPFWDKTEAGIFNEVLKPKPEFRKIPWPSISANAKDFV
KRLLVKDPRARPTAAQALSHPWVREGGCAFDPLDIIVLSNMREFVFKSRKQFAFRALATTLEPEEIHNLRDQFNIIDVDGSGITITLEIRQALLKDRP
WTLKESKVLIVQAMDANMDGFI DFEVFAATLHVRLQLELSEKWLRTKCAFDFKDKDGDGFI SPDEIKEYTGLKGS LDTLLDEADADGDGRISLRF
QKLLRQASLSRTHHHIHPHLKHPKLEMHAPSPKISEESSQ*
>29830.t000004 Org_Rcommunis peptide: 29830.m001387 calcium-dependent protein kinase, putative
(PAC:16810129)
MGACFSTIKVSGSSSNTATTTTTVGGHHYQRKEIAGNPQRISTATKTNKQTKNNNNNNNNNNNSRQKQSQSQSQKQVKEKQTLRRPGGVI PCGKRT
DFGYAKDFDKRYSIGKLLGHGQFGYTYVATDKANGDRVAVKKEIKENKMLVPIAVEDVKREVKILQELAGHENVVHFYNAFEDDSFVYIVMELCEGGELLD
RILLKDSRYTEKDAAVIVRQMLKVAEACHLHGLVHRDMKPFENFLFKSTKDDSPKATDFGLSDFIKPGKFKQDIVGSAYYVAPEVLKRRSGPESDVWSI
GVITYILLCGRRPFWDKTEAGIFKEVLRNPKDFRKPWPSISSAKDFVKLLVLDPRVRLTAAQALSHPWVREGGNASEIPIDISVLNNMRQFVKYSRF
KQFALRALASTLDEEELSDLRQDFDAIDVDKNGSISLEEMRQALAKDLPWKLKESRVLEILQAI DSNTDGLVDFSEFVAAALHVHQLEEHNSEKQWHRSQ
AAFEKFDIDKDGFI TSEELRMHTGLRGSIDPLLEADIDKDGKISLSEFRLLRTASISSRNAPSPSGHRNSRKM
>92726 Org_Smoellendorffii peptide: 92726 (1 of 2) PTHR24349:SF87 - CALCIUM-DEPENDENT PROTEIN KINASE
16-RELATED (PAC:15420653)
MGVCFVSPKRRKQDPATGNAKSRVRPAGHNRKNNAIPLGLRRTNFGYGRDFKSKYRIGKLLGHGQFGYTYSAVELMTGDKVAVKRIEKKKMLLPISIEDVK
REVKILDALSGHENVVQFHAAFEDEDFVYIVMELCEGGELLDRIILAKKEGRYTEKDAAVIVRQMLRVVARCHLNGVHRDLKPFENFLKFSQDDSLRAV
DFGLSDFIRPGRRFHDIVGSAYYVAPEVLKRRSGPESDVWSIGVITYILLCGRPFWDKTEAGIFNEVLKRRKPDLRERPWPSIGSSAKDFVRKLLVKDPR
ARLTAAQALSHPWVREGGDALEIPLDISVLNSMREFVKYSRLKQAFRALATLDPEDIAALRDQFDAIDADKSGSISLEEMKQALAKDRFPWDLKESMVM
EILQAMDCNCDGLVDFE FVAATLHVHQLEDMGSDKWQKRSKAAFQDFVDGDGYITSEELKQYTGKGS LGTLLEEGDIDGDGRISLAEFQKLLRQASL
GSRN*
>Aco015726 Org_Acomosus peptide: Aco015726.1 calcium-dependent protein kinase 28 (PAC:33034109)
MGNCSYNSSVRSGSSGRGGRGGGGGAANAGGANHERRPPEEREREKEKGERKGVVPCGKRTDFGYDKDFESRYAIGKLLGHGQFGYTFVATDKANGDK
VAVKRIDKNKMLVPAVEDVRREVKILKALKGHENVVHFFNAFEDDSYVYIVMELCEGGELLDRIILAKKNSRYSEKDAAVVVRQMLKVAEACHLHGLVHR
DMKPFENFLKSTKEDSPKATDFGLSDFIKPGKRFHDIVGSAYYVAPEVLKRRSGPESDVWSIGVITYILLCGRPFWDKTEAGIFKEVLRNPKDFRNP
WPSISDSAKDFVQRLLVKDPARLTAAQALSHPWVREGGNASDIPDISVLNSMRQFVKYSRFKQFALRALASTLNEEELADLRDQFNAIDVDKNGTISL
EEMKHALAKDLPWRMREPRVLEILEAIDSNTDGLVDFE FVAATLHVHQLELSEKWSLSQAADFQDFVDRDGYITPDELRMHSGLKGSIDPLLEED
IDKDGKISLDEFRRLLKTASMSRNIPNHSAVRNTSKS*
>Aco027228 Org_Acomosus peptide: Aco027228.1 calcium-dependent protein kinase 28 (PAC:33049140)
MFRDIVGSAYYVAPEVLKRRSGPESDVWSIGVITYILLCGRPFWDKTEAGIFKEVLRNPKDFRKPWPTISASAKDFIKLLVKNPRARLTAAQALSHP
WVREGGDAEIPVDISVLNSMREFVMYSRMKQFALRALASTLDEEELSDLRQDFDAIDVDKNGSISLEEMRHALAKDLPWRLRGRVLEILQAI DSNTDGL
LVDFKEFVTATLHVHQMAEHDSEKWLRCQAADFDFLDGDGYITPEELRLHTGLKGSIEPLLEADIDKDGKISLYEFRKLLRTASMSNLPSPPTGVRNP
HQL*
>AHYPO_018869 Org_Ahyochondriacus peptide: AHYPO_018869-RA (1 of 1) PTHR24349:SF87 - CALCIUM-DEPENDENT
PROTEIN KINASE 16-RELATED (PAC:32834481)
MGSCLSSTTKVNGSNSNSTTTTTNNALTVIKNQRKEPAKSVANTAPKNDGSHQKQTKRNEIEGNGKNNNNNNNNVGMFKHREKTSRRRQGAIPCGKRT
DFGYDKDFEYKYITIGKLLGHGQFGYTYVATDKSNGDRVAVKIKDKSKMVLPIAVEDVKREVKILKALAGHENVVQFHNAFEDENYVYIVMELCEGGELLD
RILAKKDSRYTEKDAAVVVRQMLKVAEQCHLNGLVHRDMKPFENFLFKSPKEDSALKATDFGLSDFIKPGKFKFDIVGSAYYVAPEVLKRRSGPESDVLRN
KPDFRKPWPTISNDAKDFVKLLVLDPRARYTAAQALSHPWVREGGNALDIPIDISVLNMRQFVKYSRMKQFALRALASTLNEEELADLRDQFDAIDV
DKSGTISLEEMRQALAKDLPWNNTDGLVDFTEFVAATLHVHQLEHNEKQQLSQAAFEKDFVDKDGFI TPEELKLTHTGLKGSVDPLLEADIDKDGKI
SLSEFRLLRSASISSRKIASPTCRKNSRRL*
>AL3G50930 Org_Alyrata peptide: AL3G50930.t1 (1 of 1) PF13202//PF14531 - EF hand (EF-hand_5) // Kinase-
like (Kinase-like) (PAC:35941968)
MGLCFSSGHNRRSSRNPHHPPLTVAKTRPPQSPCFMAVITQKDHRTQPRRNNAAKKTPTRQTPPHGRGREKVISNNGRRHGEAIPYGRIDFGYAKDFD
HRYTIGNLLGHGQFGYTYVATDKKTDNRVAVKIKDAMKMTIPIAVEDVKREVKILQALTGHENVVRFYNAFEDKNSVYIVMELCEGGELLDRIILAKKDSR
YSERDAAVVVRQMLKVAEACHLRLVHRDMKPFENFLFKSTEEEDSPKATDFGLSDFIKPGKFKFDIVGSAYYVAPEVLKRRSGPESDVWSIGVITYILLC
GRRPFWDKTEAGIFKEVLRNPKDFRKPWPTISNSAKDFVKLLVLDPRARLTAAQALSHPWVREGGDAEIPIDISVLNNMRQFVKFSRLKQFALRALA
TTLDEEELADLRDQFDAIDVDKNGAISLEEMRQALAKDHPWKLKARVAEILQAI DSNTDGLVDFGEFVAAALHVHQLEEHSEKQQRSRAAFEKFDID
GDGFI TAEELRMHTGLKGSIEPLLEADIDNDGKISLQEFRRLLRTASIKSRNVRSPPGYLISRKV*
>AL7G14970 Org_Alyrata peptide: AL7G14970.t1 (1 of 1) PF13499//PF13833//PF14531 - EF-hand domain pair
(EF-hand_7) // EF-hand domain pair (EF-hand_8) // Kinase-like (Kinase-like) (PAC:35937856)
MGLCFSSPKATRGRSRRNPNLHSPQOGKASNKKNKKTQWRHGGGIPYGRIDFGYAKDFDNRYIIGRLLGHGQFGYTYVATDNNNGNVRVAVK
RIEAKMTPQIEVEDVKREVKILQALGGHENVVGFHNAFEDNNYIYIVMELCEGGELLDRIILAKKDSRYTEKDAAVVVRQMLKVAEACHLRLVHRDMK
ENFLFKSTEEGSSLKATDFGLSDFIKPGMKFQDIVGSAYYVAPEVLKRRSGPESDVWSIGVITYILLCGRPFWDKTEAGIFNEVMRKKPDFREVPWPTI
SNGAKDFVKKLLVKEPRARLTAAQALSHPWVKEGGEASEVPI DISVLNNMRQFVKFSRLKQIALRALATTIDEDELDDLDRDQFDAIDIDKNGSISLEEMR
```





EAIPYGRVDFGYAKDFDNRYSRTIGKLLGGYQFGYTYVATDKKTGDRVAVKKIDKAKMRIPIAVEDVKREVKILQALTGHENVVRFYNAFEDKNSVYIAME  
LCEGGELLDRLILAKKESYERDAAVVVRQMLKVAEAECHLRGLVHRDMKMPENFLFKSTEEEDSPLKATDFGLSDFIKPGKFFHDIIVGSAYYVAPEVLKRRS  
GPEGSDVWSIGVISYILLCGRRPFWDKTEGIFKEVLKKNKDFRRKFPWPTISNSAKDFVKKLLVKDPRARLTAQAALSHPWVREGGASEIPIDISVLNNM  
RQFVKFSRLKQFALRALATTLDEEESADLRDQFDAIDVDKNGAISLEEMRQALAKDHPWKLKARVAEILQAIDSNTDGFVDFEFAAALHVNQLEEHD  
SEKWQQRSAFAFEKFDIDGDGFITAEELRMHTGLKGSIEPLLEEADIDNDGKISLHEFRLLRTASIKSRNVRNPPGYLRSRVK\*

>Bol018678 Org\_Boleraceacapitata peptide: Bol018678 (1 of 2) PF13202//PF13499//PF14531 - EF hand (EF-  
hand\_5) // EF-hand domain pair (EF-hand\_7) // Kinase-like (Kinase-like) (PAC:37361402)  
MGLCFSSPKTTHGHTNHPNPTPTDIPKPPQAKGREKVCNKNKKTNNKNIQWRHVGGNPFGRKIDFGYARDFDNRYIIGKLLGHGQFGFTYAATDNNN  
GDRVAVKRLDKAKMTQPIEIEDVKREVKILQALGGHENVVGFHNVFEDKSYVYIVMELCEGGELLDRLILSKKDSRYTEKDAAVVVRQMLKVAEAECHLRGL  
VHRDMKMPENFLFKSTGEDSSLKATDFGLSDFIKPGMKFKDVIIVGSAYYVAPEVLKRRSGPESDVWSIGVITYILLCGRRPFWDKTEGIFNEVMRKEPDFK  
TNPWPTISDGAKDFVKKLLVKEPRARLTAQAALSHSWVREGGASEIPLDISVLENMRQFVKFSRLKQFALRALASTLDEAEISDLRDQFDAIDDKNGS  
ISLEEMRQALAKDLPWKLKARVAEILQAIDSNTDGLVDFTEFVVAALHVVHQLLEEHDSEKWQLRSRAAFEFKFDIDKDGYITPEELRMHTGLRGSID  
EADVDEDEGRISIEHFRLLRSASLKPRTVKSPPGYQLSRKM\*

>Bol019292 Org\_Boleraceacapitata peptide: Bol019292 (1 of 1) PF13499//PF14531 - EF-hand domain pair  
(EF-hand\_7) // Kinase-like (Kinase-like) (PAC:37350374)  
MGLCFSDIRVTGTSSSSSRSSSQTNNNNNKKNPKSNKTRPPPPENNDKPTSTTTKRRRTGSVPCGKRTEFGYAKDFHDQYSIGKLLGHGQFGYTYVAI  
HKSNGDRVAVKRLDKSKMVLPAVEDVKREVQILKALSGHENVVQFYNAFDDDDVYIVMELCEGGELLDRLILSKKDSRYSEKDAAVVVRQMLKVAGECH  
LHGLVHRDMKMPENFLFKSAKLDSPKATDFGLSDFIKPGKFFHDIIVGSAYYVAPEVLKRRSGPESDVWSIGVITYILLCGRRPFWDKTEGIFKEVLRNK  
PDFRKPWSTISDSAKDFIKKLLVLDPRARLTAQAALSHAWVREGGNATDIPVDISVLNLRQFVRSRLKQFALRALASTLDEAEISDLRDQFDAIDVD  
KNGVISLEEMRQALAKDLPWKLKESRVAEILEAIDSNTDGLVDFTEFVVAALHVVHQLLEEHDSEKWQLRSRAAFEFKFDIDKDGYITPEELRMHTGLRGSID  
PLLEADIDRDGKISLHEFRLLRTASISSPRVPSTAGHRIPR\*

>Bol027148 Org\_Boleraceacapitata peptide: Bol027148 (1 of 1) PF13499//PF13833//PF14531 - EF-hand domain  
pair (EF-hand\_7) // EF-hand domain pair (EF-hand\_8) // Kinase-like (Kinase-like) (PAC:37361248)  
MGVCFSAIRVTGASSRQTNNNNKAHKKGCKKPPENKPTSTTTNKRRTATGSVPCGKRTEFGYAKDFHEQYTIKLLGHGQFGYTYVAIDKANGDRVAV  
KRLDKSKMVLPAVEDVKREVEILKALSGHENVVQFYNAFDDDDVYIVMELCEGGELLDRLILSKKDSRYSEKDAAVVVRQMLKVAGECHLHGLVHRDMK  
PENFLFKSTQLDPLKATDFGLSDFIKPGKFFHDIIVGSAYYVAPEVLKRRSGPESDVWSIGVITYILLCGRRPFWDKTEGIFKEVLRNKPDFRKPWST  
ISESAKDFVKKLLVLDPRARLTAQAALSHAWVREGGNATDIPVDISVLNLRQFVRSRLKQFALRALASTLDEAEISDLRDQFDAIDALAKDLPWKLK  
SRVAEILQAIDSNTDGLVDFTEFVVAALHVVHQLLEEHDSEKWQLRSRAAFEFKFDIDKDGYITPEELRMHTGLRGSIDPLLEADIDRDGKISLHEFRLLR  
TASISSQRVSPGGRHRNPR\*

>Bol041462 Org\_Boleraceacapitata peptide: Bol041462 (1 of 1) PF13202//PF13833//PF14531 - EF hand (EF-  
hand\_5) // EF-hand domain pair (EF-hand\_8) // Kinase-like (Kinase-like) (PAC:37361599)  
MGLCFSSAKVSGRQSNPNPHHPLAVAKPRAPQTPCSFLAVTIQKDHKAQPRRNAATTTNKTTPPQTQTRQTPTHGKVRKAKRHGEKIPYGRKVD  
FGYAKDFDNRYSRTIGKLLGHGQFGYTYVATDKRTGDRVAVKKIDKAKMTRPIAVEDVVRREVKILQALTGHENVVRFYNAFEDKNSVYIAMELCEGGELLD  
ILSKDASHYTERDAAVVVRQMLKVAEAECHLRGLVHRDMKMPENFLFKSTEEEDSPLKATDFGLSDFIKPGKFFHDIIVGSAYYVAPEVLKRRSGPESDVWSIG  
VISYILLCGRRPFWDKTEGIFKEVLKKNKDFRRKFPWPTISNSAKDFVKKLLVKDPRARLTAQAALSHPWVREGGDATEIPIDISVLSNMRQFVKFSRLK  
QFALRALATTLDEEELADLRDQFGAMADKNGAISLEEMRQALAKDHPWKLKARVAEILQAIDSNTDGFVDFEFAAALHVNQLEEHDSEKWQQRSA  
AFEKFDIDGDGFITAEELRMHTGLKGSIEPLLEEADIDHDGKISLHEFRLLRTASIKSRNVRNPPGYLRSRKA\*

>Bostr.0568s0032 Org\_Bstricta peptide: Bostr.0568s0032.1.p (1 of 2) PTHR24349:SF87 - CALCIUM-DEPENDENT  
PROTEIN KINASE 16-RELATED (PAC:30669325)  
MGLCLSSIRVTGASSRQRSSQTNNNNHKGCKKAVPNPKDIDTKRRTDSSIPCGKRTEFGYAKDFHDQYSIGKLLGHGQFGYTYVAIDKANGDRVAVKRLD  
KSKMVLPAVEDVKREVQILKALSGHENVVQFYNAFEDDDVYIAMELCEGGELLDRLILSKKDSRYSEKDAAVVVRQMLKVAGECHLHGLVHRDMKMPENF  
LFKSAKLDSPKATDFGLSDFIKPGKFFHDIIVGSAYYVAPEVLKRRSGPESDVWSIGVITYILLCGRRPFWDKTEGIFKEVLRNKPDFRKPWSTISDS  
AKDFVKKLLVLDPRARLTAQAALSHAWVREGGNATDIPVDISVLNLRQFVRSRLKQFALRALASTLDEAEISDLRDQFDAIDVDKNGVISLEEMRQAL  
AKDLPWKLKDSRVAEILQAIDSNTDGLVDFTEFVVAALHVVHQLLEEHDSEKWQLRSRAAFEFKFDIDKDGYITPEELRMHTGLRGSIDPLLEADIDRDGKI  
SLHEFRLLRTASISSQRVSSPSGHRNPR\*

>Bostr.18351s0257 Org\_Bstricta peptide: Bostr.18351s0257.1.p (1 of 2) PTHR24349:SF87 - CALCIUM-  
DEPENDENT PROTEIN KINASE 16-RELATED (PAC:30676600)  
MGLCFSSAAKASGHNSRRNPIPHPLTVAKPRPPQTPCSFMAVTIQKDHRTQPRRNAAKTPTWQTPPHGRERDKVSSNNNNNNNRRHGEAIPYGRK  
IDFGYAKDFDHRYSRTIGKLLGHGQFGYTYVATDKKTGDRVAVKKIDKAKMTPIAVEDVKREVKILQALTGHENVVRFYNAFEDKNSVYIAMELCEGGELLD  
DRILARKDSRYSEKDAAVVVRQMLKVAEAECHLRGLVHRDMKMPENFLFKSTEEEDSPLKATDFGLSDFIKPGKFFHDIIVGSAYYVAPEVLKRRSGPESDVWS  
IGVISYILLCGRRPFWDKTEGIFKEVLKKNKDFRRKFPWPTISNSAKDFVKKLLVKDPRARLTAQAALSHPWVREGGASEIPIDISVLSNMRQFVKFSR  
LKQFALRALATTLDEEELADLRDQFDAIDVDKNGAISLEEMRQALAKDHPWKLKARVAEILQAIDSNTDGFVDFTEFVVAALHVNQLEEHDSEKWQQR  
RAAFEFKFDIDGDGYITAEELRMHTGLKGSIEPLLEEADIDNDGKISLHEFRLLRTASIKSRNVRNPPGYLRSRVK\*

>Bradi1g52567 Org\_Bdistachyon peptide: Bradi1g52567.1.p (1 of 1) PTHR24349//PTHR24349:SF123 -  
SERINE/THREONINE-PROTEIN KINASE // SUBFAMILY NOT NAMED (PAC:32792415)  
MGLCSSSSAASPAGNGNKEKGRKSGSRGIVACGKRTEFGYDKDFEARYITIGKLLGHGQFGYTFAAVDYSDRERAVKRIKDKNMVLPVAVEDVKR  
EVKILKALQGHENVVHRYNAFEDDDVYIAMELCEGGELLDRLILAKKDSRYSEKDAAVVVRQMLKVAEAECHLRGLVHRDMKMPENFLFKSSKEGSPKATD  
FGLSDFIRAGKQFRDIVGSAYYVAPEVLKRRSGPESDVWSIGVITYILLCGRRPFWDKTEGIFKEVLKKNKDFRRKFPWNTITPSAKDFVQKLLVKDPRA  
RLTAQAALSHAWVREGGQASEIPLDISVLSNMRQFVKYSRQFALRALASTLNSSELSDLRDQFNAIDIDKSGTISLEELKQALAKDVPWRLKGPVLE  
IVEAIDSNTDGLVDFEFAATLHVHQLVEHDSEKWKSLSQAADFDFVDGDGYITSDLELRMNTGLKGSIDPLLEADIDKDGKISLDEFRLLRTASMS  
SRNATPKSVSKSYRFA\*

>Bradi3g02600 Org\_Bdistachyon peptide: Bradi3g02600.2.p CAMK\_CAMK\_like.26 - CAMK includes  
calcium/calmodulin dependent protein kinases, expressed, subfamily CAMK\_like(CAMK\_1) (PAC:32812227)  
MGGCFSTNTPAERERRRRRRRQRAASPEKSGGGAEGVARVVEFGYERDFEGRYEVGRLLGHGQFGYTFAAATDRGSDRVAVKRIKAKMNRVAV  
DVKREVKILKALKGHENIVHRYNAFEDDDVYIAMELCEGGELLDRLILAKKNSRYSEKDAAVVVRQMLKVAEAECHLRGLVHRDMKMPENFLFKSTKEDSPL

KATDFGLSDFINPGKFRDIVGSAYVVAPEVLKRRSGPESDVWSIGVITYILLCGRRPFWDKTEDGIFKEVLRNKPDFRKRWPWSISTSAKDFVKRLLVK  
NPRARLTAAQALSHPWVREGGDASEIPVDISVLYNMRQFVKYSRFKQFALRALASTVNEEELADLKDQFDAIDIDKSGSISIEEMRHALAKDLPWRLKGP  
RVLEIIQAIDSNTDGLVDFKEFVAATLHIHQMAELDSERWGLRCAAFSKFDLDGDGYITPEDELRMHTGLKGSIEPLLEEADIDKDGRIISLSEFRKLLRT  
ASMSNLPSPPTGVPNPQAL\*

>Brara.F02520 Org\_BrapaFPsc peptide: Brara.F02520.1.p (1 of 2) PF13202//PF13499//PF14531 - EF hand (EF-hand\_5) // EF-hand domain pair (EF-hand\_7) // Kinase-like (Kinase-like) (PAC:30630447)

MGLCFSSAKVSGRRNHSRSPNPNPLTVAKHRPPQTPCSFLAVTIQKDHRTQPRRSPATTKKTPPQTQTQTRQTPPHGKGREKAGNNNNNNKGRHGEA  
IPYGRKRVDFYAKDFDNRYTIGKLLGHGQFGYTYVATDKKTGDRVAVKKIDKAKMTIPIAVEDVVKREVKILQALTGHEENVVRFYNAFEDKNSVYIAMELC  
EGGELLDRILAKKESRYSERDAAVVVRQMLKVAEACHLRGLVHRDMKPENFLFKSTDEDSPLKATDFGLSDFIKPGKFFHDI VGSAYVVAPEVLKRRSGP  
ESDVWSIGVITYILLCGRRPFWDKTEDGIFKEVLRNKPDFRKRWPWTVSNAKDFVKKLLVKDPRARLTAAQALSHPWVREGGDASEIPIDISVLYNMRQ  
FVKFSRLKQFALRALATLDEEESADLRDQFDAIDVDKNGAISLDEMRQALAKDHPWKLKDARVAEILQAIIDSNTDGFVDFEEFVAAALHVNQLEEHDS  
KWQQRRAAFEFKFDIDGDFITAEELRMHTGLKGSIEPLLEEADIDNDGKISLHEFRLLRTASIKSRNVRNPPGYLVSRVK\*

>Brara.G00225 Org\_BrapaFPsc peptide: Brara.G00225.1.p (1 of 1) PF13202//PF13833//PF14531 - EF hand (EF-hand\_5) // EF-hand domain pair (EF-hand\_8) // Kinase-like (Kinase-like) (PAC:30634206)

MGLCFSSAKVSGRQHSRSPENPHHPLTVAKPKPPQTPCSFLAVTIQKDHKAQQRRNAATTTNKKTPPTRQTPPHGKAREKAKRHGEKIPYGRKRVDFGY  
AKDFDNRYTIGKLLGHGQFGYTYVATDKKTGDRVAVKKIDKAKMTLPIAVEDVVRREVKILQALTGHEENVVRFYNAFEDKNSVYIAMELCGEGELLDRILA  
KKDSHYTERDAAVVVRQMLKVAEACHLRGLVHRDMKPENFLFKSTEDSALKATDFGLSDFIKPGKFFHDI VGSAYVVAPEVLKRRSGPESDVWSIGVIS  
YILLCGRRPFWDKTEDGIFKEVLRNKPDFRKRWPWTISNAKDFVKKLLVKDPRARLTAAQALSHPWVREGGDASEIPIDISVLYNMRQFVKFSRLKQFA  
LRALATLDEEELADLRDQFGAMADKNGAISLDEMRQALAKDHPWKLKDARVAEILQAIIDSNTDGFVDFEEFVAAALHVNQLEEHDSKQQRRAAFE  
KFDIDGDFITAEELRMHTGLKGSIEPLLEEADIDHDGKISLHEFRLLRTASIKSRNVRNPPGYLISRKT\*

>Brara.G01274 Org\_BrapaFPsc peptide: Brara.G01274.1.p (1 of 2) PF13499//PF14531 - EF-hand domain pair (EF-hand\_7) // Kinase-like (Kinase-like) (PAC:30633535)

MGVCFSAIRVTGASSRQTNNNKAHKGCKKPPENKPSNTTKRRATGVSVPCKRRTDFGYAKDFHEQYTIKLLGHGQFGYTYVAIDKSNDRVAVKRLDKS  
KMLVPIAVEDVVKREVEILKALSGHENVVQFYNAFDDDDDYVIVMELCEGEGELLDRILSKKDSRYSEKDAAVVVRQMLKVAGECHLHGLVHRDMKPENFLF  
KSTQLDSPKATDFGLSDFIKPGKRFHDI VGSAYVVAPEVLKRRSGPESDVWSIGVITYILLCGRRPFWDRTEDGIFKEVLRNKPDFRKRWPWTISDSA  
KDFVKKLLVKDPRARLTAAQALSHAWVREGGNATDIPVDISVLYNMRQFVYRSRLKQFALRALASTLDEAEISDLRDQFDAIDVDKNGVILEEMRQALAK  
DLPWKLKDSRVAEIIQAIDSNTDGLVDFTEFVAAALHVHQLEEHDSKQWLRRAAFEFKFDIDKDGTYITPEELRMHTGLRGSIDPLLEADIDRDKGKISL  
HEFRLLRTASISSQRVISAPGHRNPR\*

>Brara.I00917 Org\_BrapaFPsc peptide: Brara.I00917.1.p (1 of 2) PF13499//PF14531 - EF-hand domain pair (EF-hand\_7) // Kinase-like (Kinase-like) (PAC:30645318)

MGVCFSAIRVTGTSSSRSSSQTNNNKKNPKSNNTKPPENNNKPSNTTTKRRATGVSVPCKRTEFGYAKDFHEQYSIGKLLGHGQFGYTYVAIHKSNG  
DRVAVKRLDKSKMVLPAVEDVVKREVQILKALSGHENVVQFYNAFDDDDDYVIVMELCEGEGELLDRILSKKDSRYSEKDAAVVVRQMLKVAGECHLHGLV  
HRDMKPENFLFKSAKLDSPKATDFGLSDFIKPGKFFHDI VGSAYVVAPEVLKRRSGPESDVWSIGVITYILLCGRRPFWDRTEDGIFKEVLRNKPDFRKR  
KPWSTISDSAKDFIKKLLVKDPRARLTAAQALSHAWVREGGNATDIPVDISVLYNMRQFVYRSRLKQFALRALASTLDEAEISDLRDQFDAIDVDKNGVILEEMRQALAK  
DLPWKLKDSRVAEIIQAIDSNTDGLVDFTEFVAAALHVHQLEEHDSKQWLRRAAFEFKFDIDKDGTYITPEELRMHTGLRGSIDPLLEADIDRDKGKISL  
HEFRLLRTASISSPRVASTAGHRIPR\*

>Brara.K01328 Org\_BrapaFPsc peptide: Brara.K01328.1.p (1 of 2) PF13202//PF13499//PF14531 - EF hand (EF-hand\_5) // EF-hand domain pair (EF-hand\_7) // Kinase-like (Kinase-like) (PAC:30623319)

MGLCFSSPKATRHGTNHPNPNPPDIPKPKSQGKREKVCNQKKTTKNNKIQRHVGGTLFGKRIDFGYARDFNRYTIGKLLGHGQFGFTYAATDNN  
NEDRVAVKRIDKAKMTQPIEDVVKREVKILQALGGHENVVGFHNVFEDKNYVYIVMELCEGEGELLDRILSKKDSRYSEKDAAVVVRQMLKVAEACHLRG  
LVHRDMKPENFLFKSTENSSLKATDFGLSDFIKPGMKFQDIVGSAYVVAPEVLKRRSGPESDVWSIGVITYILLCGRRPFWDKTDNGIRFVEMRKKPDF  
ETTPWPTISDGAKDFVKKLLVKEPRARLTAAQALSHSWVREGGEASEIPIDISVLYNMRQFVKFSRLKQIALKALATTIDEDELDDRDQFDAIDIDKNG  
SISLEEMRQALAKDLPWKLKDARVAEILQAIIDSNTDGLVDFTEFVVAATLHVNQLEEHDSKWEQSRRAAFEFKFDVDRDGFITPEELRLQTGLKGSIEPLL  
EADIDEDGRISIEFRLLRSASLKPRTVKSPPGYQLSRKM\*

>Brast04G317700 Org\_Bstacei peptide: Brast04G317700.1.p (1 of 1) PTHR24349//PTHR24349:SF137 - SERINE/THREONINE-PROTEIN KINASE // SUBFAMILY NOT NAMED (PAC:32863370)

MGGCFSTASATPAAERRRRRQRAASPEKSGGAEGVAPRVVEFGYERDFEGRYEVGRLLGHGQFGYTFATDRGSGDRVAVKRIDKAKMNRPAVED  
VKREVKILKALKGHENIVHFYNAFEDDSYVYIVMELCEGEGELLDRILAKKNSRYSEKDAAVVVRQMLKVAEACHLRGLVHRDMKPENFLFKSTKEDSPLK  
ATDFGLSDFIKPGKFRDIVGSAYVVAPEVLKRRSGPESDVWSIGVITYILLCGRRPFWDKTEDGIFKEVLRNKPDFRKRWPWSISTSAKDFVKRLLVKN  
PRARLTAAQALSHPWVREGGDASEIPVDISVLYNMRQFVKYSRFKQFALRALASTVNEEELADLKDQFDAIDIDKSGSISIEEMRHALAKDLPWRLKGP  
VLEIIQAIDSNTDGLVDFKEFVAATLHIHQMAELDSERWGLRCAAFSKFDLDGDGYITPEDELRMVQHTGLKGSIEPLLEEADIDKDGKISLSEFRKLLR  
TASMSNLPSPPTGVPNPQAL\*

>Brast06G146700 Org\_Bstacei peptide: Brast06G146700.1.p (1 of 1) PTHR24349//PTHR24349:SF123 - SERINE/THREONINE-PROTEIN KINASE // SUBFAMILY NOT NAMED (PAC:32852110)

MGLCSSSAAARPADPAGSNGNKEKGRKSGGRGLVACGKRTDFGYDKDFEARYTIGKLLGHGQFGYTFAAVDRYSDERAVKRIDKKNMVLPAVEDVVKR  
EVLKILKALQGHENVVHFYNAFEDDNYVYIVMELCEGEGELLDRILAKKNSRYSEKDAAVVVRQMLKVAEACHLRGLVHRDMKPENFLFKSKEGSPKATD  
FGLSDFIRAGKQFRDIVGSAYVVAPEVLKRRSGPESDVWSIGVITYILLCGRRPFWDKTEDGIFKEVLRNKPDFRKRWPWTNITPSAKDFVQKLLVKDPR  
RLTAAQALSHWVREGGQASEIPLDISVLYNMRQFVKYSRFKQFALRALASTLNSEELSDLHDQFNAIDIDKSGTISLEELKQALAKDVPWRLKGPVLE  
IVEAIDSNTDGLVDFEEFVAATLHVHQLEEHDSKWKSLQAADFDFVDGDGYITSDELRMNSGLKGSIDPLLEEADIDKDGKISLSEFRLLRTASMS  
SRNATPKSVSKS\*

>Cagra.10427s0030 Org\_Cgrandiflora peptide: Cagra.10427s0030.1.p (1 of 3) PTHR24349:SF87 - CALCIUM-DEPENDENT PROTEIN KINASE 16-RELATED (PAC:28917453)

MGVCFSAIRVTGASSRRSQTNNHNRKGCQKKAASPCNPKAIDAKRSRTGSI PCGKRTDFGYPKDFHDQYSIGKLLGHGQFGYTYVAIDKSNDR  
RVAVKRLDKSKMVLPIAVEDVVKREVEILQALSGHENVVQFNAFEDDDYVYIAMELCGEGELLDRILSKKDSRYSEKDAAVVVRQMLKVAGECHLHGLVH  
RDMKPENFLFKSKDLSPLKATDFGLSDFIKPGKFFHDI VGSAYVVAPEVLKRRSGPESDVWSIGVITYILLCGRRPFWDRTEDGIFKEVLRNKPDFRKR

PWSTISDSAKDFVKKLLVKDPRARLTAQAALSHAWVREGGNATDIPVDISVLNLRQFVRYSRKQFALRALASTLDEAEISDLRQDFDAIDVDKNGVIS  
LEEMRQALAKDLPWKLKDSRVSEILQAIDSNTDGLVEFTEFVAALHVVHQLLEHDSEKQQRSRAAFEKFDIDKDG YITPEELRMHTGLRGSIDPLLEEA  
DIDRDGKISLHEFRLLRTASISSQRVSSPSGRHRNPR\*

>Cagra.2236s0004 Org\_Cgrandiflora peptide: Cagra.2236s0004.1.p (1 of 1) PF13202//PF13833//PF14531 - EF  
hand (EF-hand\_5) // EF-hand domain pair (EF-hand\_8) // Kinase-like (Kinase-like) (PAC:28906597)  
MGLCCSSPKATRHGTSRPNPNHGSPTQGGKANEKVSNNKNGKTKNKNKIQRQGGRTPYGKRIDFGYAKDFDNRYTIGKLLGHGQFGFTYVATDNNNGNSV  
AVKRIDKAKMSLPIEVEDVKREVKILQALGGHENVVGFHNAFDDKNYVYIVMELCEGGELLDRI LGKKDSRYTEKDAAVVVRQMLKVAEACHLRLGLVHRD  
MKPENFLFKSTEESSSLKATDFGLSDFIKPGTKFQDIVGSAYYVAPEVLKRRSGPESDVWSIGVITYILLCGRRPFWDKTDQDGFNEVMRKKPDPFKTVPW  
PTISNSAKDFVKKLLVKEPCARLTAQAALSHPWVREGGEASEIPIDISVLNMMRQFVKFSRLKQIALRALATTIDEDELDDLRDQFDAIDIDKNGSISLE  
EMRQALAKDVPWKLK DARVAEILQAIDSNTDGLVDFTEFVVATLHVNVQLEEHDSKQQRSRAAFDKFDIDRDGFI TPEELRLQTGLKGSIEPLLEEADV  
DEDGRLSIHEFRLLRSASIKSRNTKSPPGYQLSRKM\*

>Cagra.3126s0021 Org\_Cgrandiflora peptide: Cagra.3126s0021.1.p (1 of 1) PF13202//PF13499//PF14531 - EF  
hand (EF-hand\_5) // EF-hand domain pair (EF-hand\_7) // Kinase-like (Kinase-like) (PAC:28902422)  
MGLCFSSAAKATGHNRSRNPVPHPLTVAKHRPPQSPCSFMAVTIQKDHRTQPRRKTPTRQTPPHGRGREKVISNNNNNNKRHGEAVIIPYGKRV  
FGYAKDFDHRITIGKLLGHGQFGYTYVATDKKTGDRVAVKIKD KAKMTIPIAIVEDVKREVKILQALTG HENVVRFYNAFEDKNSVYIVMELCEGGELLD  
ILARKDSRYSEKDAAVVVRQMLKVAEACHLRLGLVHRDMKPENFLFKSTDEDSALKATDFGLSDFIKPGKFFHDI VGSAYYVAPEVLKRRSGPESDVWSIG  
VISYILLCGRRPFWDKTEDGIFKEVLKKNKPDFRRKPWPTISNSAKDFVKKLLVKDPRARLTAQAALSHPWVREGGDASEIPIDISVLNMMRQFVKFSRLK  
QFALRALATTIDEELADLRDQFDAIDVDKNGAISLEEMRQALAKDHPWKLK DARVAEILQAIDSNTDGFVDFSEFVAALHVNQLEEHDSKQQRSRA  
AFEKFDIDG DGYITAEELRMHTGLKGSIEPLLEEADIDNDGKISLHEFRLLRTASIKSRNVRSPPGYLISRKV\*

>Carubv10006766m.g Org\_Crubella peptide: Carubv10006766m (1 of 1) PF13202//PF13833//PF14531 - EF hand  
(EF-hand\_5) // EF-hand domain pair (EF-hand\_8) // Kinase-like (Kinase-like) (PAC:20895390)  
MGLCCSSPKATRHGTSRPNPNHGSPTQGGKANEKVSNNKNGKTKNKNKIQRQGGRTPYGKRIDFGYAKDFDNRYTIGKLLGHGQFGFTYVATDNNNGNSV  
AVKRIDKAKMSLPIEVEDVKREVKILQALGGHENVVGFHNAFDDKNYVYIVMELCEGGELLDRI LGKKDSRYTEKDAAVVVRQMLKVAEACHLRLGLVHRD  
MKPENFLFKSTEESSSLKATDFGLSDFIKPGTKFQDIVGSAYYVAPEVLKRRSGPESDVWSIGVITYILLCGRRPFWDKTDQDGFNEVMRKKPDPFKTVPW  
PTISNSAKDFVKKLLVKEPCARLTAQAALSHPWVREGGEASEIPIDISVLNMMRQFVKFSRLKQIALRALATTIDEDELDDLRDQFDAIDIDKNGSISLE  
EMRQALAKDVPWKLK DARVAEILQAIDSNTDGLVDFTEFVVATLHVNVQLEEHDSKQQRSRAAFDKFDIDRDGFI TPEELRLQTGLKGSIEPLLEEADV  
DEDGRLSIHEFRLLRSASIKSRNIKSPPGYQLFRKM\*

>Carubv10013325m.g Org\_Crubella peptide: Carubv10013325m (1 of 1) PF13202//PF13499//PF14531 - EF hand  
(EF-hand\_5) // EF-hand domain pair (EF-hand\_7) // Kinase-like (Kinase-like) (PAC:20897988)  
MGLCFSSAAKATGHNRSRNPVPHPPPLTVAKHRPPQSPCSFMAVTIQKDHRTQPRRKTPTRQTPPHGRGREKVISNNNNNNKRHGEAVIIPYGKRV  
DFGYAKDFDHRITIGKLLGHGQFGYTYVATDKKTGDRVAVKIKD KAKMTIPIAIVEDVKREVKILQALTG HENVVRFYNAFEDKNSVYIVMELCEGGELLD  
RILARKDSRYSEKDAAVVVRQMLKVAEACHLRLGLVHRDMKPENFLFKSTDEDSALKATDFGLSDFIKPGKFFHDI VGSAYYVAPEVLKRRSGPESDVWSIG  
VISYILLCGRRPFWDKTEDGIFKEVLKKNKPDFRRKPWPTISNSAKDFVKKLLVKDPRARLTAQAALSHPWVREGGDASEIPIDISVLNMMRQFVKFSRLK  
QFALRALATTIDEELADLRDQFDAIDVDKNGAISLEEMRQALAKDHPWKLK DARVAEILQAIDSNTDGFVDFSEFVAALHVNQLEEHDSKQQRSRA  
AAFEKFDIDG DGYITAEELRMHTGLKGSIEPLLEEADIDNDGKISLHEFRLLRTASIKSRNVRSPPGYLISRKV\*

>Carubv10028399m.g Org\_Crubella peptide: Carubv10028399m (1 of 3) PTHR24349:SF87 - CALCIUM-DEPENDENT  
PROTEIN KINASE 16-RELATED (PAC:20911700)  
MGVCFSAIRVTGASSRRSQTNTNHNRTKGCQKKKAASPCPNPKAIDAKRSRTGSI PCGKRTDFGYPKDFHDQYSIGKLLGHGQFGYTYVAIDKSN  
RVAVKRLDKSKMVLPIAIVEDVKREVQILQALSGHENVVGFHNAFEDDDYVYIAMELCEGGELLDRI LSKKDSRYSEKDAAVVVRQMLKVAGECHLHGLVH  
RDMKPENFLFKSDKLDSPKATDFGLSDFIKPGKFFHDI VGSAYYVAPEVLKRRSGPESDVWSIGVITYILLCGRRPFWDRTEDGIFKEVLKKNKPDFRRK  
PWSTISDSAKDFVKKLLVKEPCARLTAQAALSHAWVREGGNATDIPVDISVLNLRQFVRYSRKQFALRALASTLDEAEISDLRQDFDAIDVDKNGVIS  
LEEMRQALAKDLPWKLKDSRVSEILQAIDSNTDGLVEFTEFVAALHVVHQLLEHDSEKQQRSRAAFEKFDIDKDG YITPEELRMHTGLRGSIDPLLEEA  
DIDRDGKISLHEFRLLRTASISSQRVSSPSGRHRNPR\*

>Ciclev10025251m.g Org\_Cclementina peptide: Ciclev10025251m (1 of 1) PTHR24349:SF87 - CALCIUM-DEPENDENT  
PROTEIN KINASE 16-RELATED (PAC:20800576)  
MGICLSTTKVSGSNSGNNNNANHHNRNANKEEAKRRHRNRHARNDTTHKHQHQHQERAKNYQQLKTKQHQTNSRRQTGVI PCGKRTDFGYDKDFDRRYTI  
GKLLGHGQFGYTYVATDKANGDRVAVKIEKNKMILPIAIVEDVKREVKILQALAGHENVVGFYNAFEDDNYVYIAMELCEGGELLDRI LAKMISITL TSA  
WFLAIRKDSRYTEKDAAVVVRQMLRVAEACHLHGLVHRDMKPENFLFKSAKEDSSSLKATDFGLSDFIKPGKFFQDIVGSAYYVAPEVLKRRSGPESDVWS  
IGVITYILLCGRRPFWDKTEDGIFKEVLKKNKPDFRRKPWPSISNSAKDFVKKLLVKDPRARLTAQAALSHPWVREGGDASEIPIDISVLNMMRQFVKYSR  
LKQFALRALASTLDEELADLRDQFDAIDVDKNGSISLEEMRQALAKDLPWKLKESRVLEILQAIDCNTDGLVDFSEFVAATLHVHQLLEHDSEKWHLRS  
QAAFEKFDIDRDGFI TPEELRMHTGLKGSIDPLLEEADIDKGRISLSEFRLLRTASISSRNVPSPSGHRNPRKL\*

>DCAR\_016603 Org\_Dcarota peptide: DCAR\_016603 hypothetical protein (PAC:36076972)  
MGSCFSTKKITGSSSNTTNTNTHVKKPASSATSTSAATKLTyrNNNNKNNKNDNDHRNQQLIRHRDKASSRKQNGVI PCGKRTDFGYDKDFDLRYSIGK  
LLGHGQFGYTYVAVDRSNGDRVAVKIKDKNMILPIAIVEDVKREVRILKALSGHENVVGFYNAFEDDSYVYIAMELCEGGELLDRI LAKSSRYTEKDA  
RVVRQMLKVAEACHLHGLVHRDMKPENFLFKSPKDDSAKATDFGLSDFIRPGKFFQDIVGSAYYVAPEVLKRRSGPESDVWSIGVITYILLCGRRPFWD  
KTEDGIFKEVLKKNKPDFRRKPWPTISNGAKDFVKKLLVKEPRARYTAAQALSHPWVREGGNALEIPLDISVLYNMRQFVKYSRLKQFALRALASTLDEE  
LADLRDQFHAIDVDKNGAISLEEMRQALAKDIPWKVKESRVLEILQAIDSNTDGLVDFHEFVAATLHVHQLLEHNSEKQQISHAAFEKFDVDKDG YITA  
EELKMHTGLRGSIDPLLEEADIDKDGKISLSEFRLLRTASMGTRNVNSPAAHRGSRQ\*

>DCAR\_021501 Org\_Dcarota peptide: DCAR\_021501 hypothetical protein (PAC:36084600)  
MGKLLGHGQYGYTYVATDNSNGDRVAVKIKDKNMILPIAIVEGVKREVRIMKALSGHENVVGFHNSFEDDSYVYIAMELCEGGELLDRI LAKSSRYTEK  
DAAAVARQMLKVAEACHLHGLVHRDMKPENFLFKSPEEDSTLKV7DFGLSDFIRPGKFFQDIVGSAYYVAPEVLKRRSGPESDVWSIGVITYILLCGRRP  
FWDETEDGIFKEVLKKNKPDFCRKPWPTISDDAKDFVKNLLVKEPRARYTAAQALSHPWVREGGNALEIPLDISVLYNMRQFVKYSRLKQALALASTLD  
EELADLRDQFLAIDVDKNGTISLEEMRQALAKDIPWKVKESRVLEILQAIDSNTDGLIDFHEFVAATLHVHQLLEHNSEKQQISHAAFEKFDVDKDG Y  
ITAEELRMEQVELSV\*

>Eucgr.I02347 Org\_Egrandis peptide: Eucgr.I02347.1.p (1 of 1) PF07714//PF13202//PF13499 - Protein

tyrosine kinase (Pkinase\_Tyr) // EF hand (EF-hand 5) // EF-hand domain pair (EF-hand 7) (PAC:32064182)  
MGICASSAARRAGGSAGASTRRNGNRRRERDQDGAGEANRKRKDDRQAKEGGGGGGGNGKQGGGAVPCGKRADFGYARDFEAERYSLGKLLGHGQFGYTY  
VAVDKVNGDRVAVKRLDKSKMVLPIAVEDVKREVKILRALTGHENNVQFYDAFEDDSYVYIAMEYCEGGELLDRIILAKKDSRYTEKDAVVVRQMLRVAA  
ECHLHGLVHRDMKPENFLFKSSKEDSPLKATDFGLSDFINPGKRFQDIVGSAYYVAPEVLKRRKSGPESDVWSIGVITFILLCGRPFWDKTEDGIFKEVL  
KKKPDFRRRPWPTISNSAKDFVKKLLVKDPRARLTAAQALSHPWVREGGNASDIPIDISVLNMRQFVKYGRKQFALRALASTLDGEEELADLKQDFAAI  
DVKNGSISLEEMREALAQDLPWKMKESRVLEILQAIDSNTDGLVDFTEFVAATLHVHQMEEHDSKQWLRSSQAFAFEKFDIDRDGYITPEELRLQTLGK  
SLGPLLEEADIDKDGKISLSEFRLLRTASMGSQLPSSSGYRNLRKI\*  
>Eucgr.J02432 Org\_Egrandis peptide: Eucgr.J02432.1.p (1 of 1) PF13499//PF14531 - EF-hand domain pair  
(EF-hand\_7) // Kinase-like (Kinase-like) (PAC:32034103)  
MGLCISTTRVSGSSSNAAAAANQKRHEIGRPQAGAAGGTAGANEKKNKQKVRGEGGKGGKSGVIPCGRKRTDFGYAKDFDRRYTIGKLLGHGQFGYTYVAT  
DKANGDRVAVKRIEKNMVLPIAVEDVKREVKILQALTGHENNVQFYNAFEDDSYVYIVMELCEGGELLDRIILSKKDSRYTEKDAVVVRQMLKVAQCH  
LHGLVHRDMKPENFLFKSKKDDSSLKATDFGLSDFIKPGKFPDVIKPGKRFQDIVGSAYYVAPEVLKRRSGPESDVWSIGVITYILLCGRPFWDKTEDGIFKEVLKSK  
PDFRRRPWPSISNSAKDFVKKLLVKDPRARLTAAQALSHPWVREGGASEIPIDISVLNMRQFVKYGRKQFALRALASTLDEEELADLKQDFAIDVD  
KNGSISLEEMRQALAKDLPWKLKESRVLEILQAIDSNTDGLVDFTEFVAATVHVQNLEEHNSKWLRRSSQAFAFEKFDLDGDGYITPEELRMHTGLRGSID  
PLLEEADIDKDGRIISLSEFRLLRTASMSKTVSSPSNFRNSRKM\*  
>evm.TU.supercontig\_6.254 Org\_Cpapaya peptide: evm.model.supercontig\_6.254 (1 of 2) PTHR24349:SF87 -  
CALCIUM-DEPENDENT PROTEIN KINASE 16-RELATED (PAC:16423436)  
MGTCLSTTKVSGANSNTATTTTNNVHNRKRATKPKQSTTAAATATTTTTTTNQEQQSQQNHNNHANKTQNRNSQQLKAKEKTSRRRPGGVI PCGKRTD  
FGYAKDFDKRYAIGKLLGHGQFGYTYVATDKVNGDRVAVKRIEKNMVLPIAVEDVKREVKILQALTGHENNVQFYNAFEDENYVYIVMELCEGGELLDRI  
ILAKFQDIVGSAYYVAPEVLKRRSGPESDVWSIGVITYILLCGRPFWDKTEDGIFKEVLKRNKPDFRRKPWPTISNAKDFVKKLLVKDPRARLTAAQAL  
SHPWVREGGEASEIPIDISVLNMRQFVKYGRKQFALRALASTLDDEELADLDKQDFAIDVDKNGSISLEEMRQALAKDLPWKLKDSRVLEILQAIDCN  
TDGLVDFTEFVAALHVHQLEEHDSKQWLRSSQAFAFEKFDLDGDGYITPEELRLHTGLKGSIDPLLEEADIDKDGKISLSEFRLLRTASIGSRNIPSP  
GQRIPRKI\*  
>Glyma.01G166100 Org\_Gmax peptide: Glyma.01G166100.1.p (1 of 4) PTHR24349:SF87 - CALCIUM-DEPENDENT  
PROTEIN KINASE 16-RELATED (PAC:30544862)  
MGLCFSTTKVSGSSSNNNNNNNASSNRNRKCSAAPAAAPEPEVTPQKKQPSQAQRRRVPPEESRKNPRAKDKAGARRQGTFRVPCGKRTDFGYEKDFENRF  
SLGKLLGHGQFGYTYVIGIDKNGDRVAVKRLKESKMLVPIAVEDVKREVKILKELTGHENNVQFFNAFEDDSYVYIVMELCEGGELLDRIILAKKDSRYTE  
KDAVVVRQMLKVAEECHLHGLVHRDMKPENFLFKSTKEDSPLKATDFGLSDFIKPGKRFQDIVGSAYYVAPEVLKRRKSGPESDVWSIGVITYILLCGR  
PFWDKTEDGIFKEVLKRNKPDFRRKPWPTISNAKDFMCKLLVKDPRARYTAAQALSHPWVREGGEALEIPIDISVLNMRQFVKYGRKQFALRALASTL  
NEGELSDLKQDFAIDVDKNGSISLEEMRQALAKDQPKLKESRVLEILQAIDSNTDGLVDFTEFVAATLHVHQLEEHDSKQWLRSSQAFAFEKFDLDKDG  
YITPEELRMHTGLRGSIDPLLEEADIDKDGKISLSEFRLLRTASMSRVTMSPSHRHRKI\*  
>Glyma.02G048300 Org\_Gmax peptide: Glyma.02G048300.1.p (1 of 4) PTHR24349:SF87 - CALCIUM-DEPENDENT  
PROTEIN KINASE 16-RELATED (PAC:30506592)  
MGACFSATKVSNGSNGVNVNKKRRGTTKPKSETAKANQRHKAASSRHVPCGKRTDFGYKDFNQRYSLGKLLGHGQFGYTYVIGIDKANGDRVAVKRL  
EKSKMVLPIAVEDVKREVKILKALTGHENNVQFYNAFEDDSYVYIVMELCEGGELLDRIILAKKDGRYTEKDSAVVVRQMLKVAEECHLHGLVHRDMKPEN  
FLFKSIKEDSPLKATDFGLSDFIKPGKRFHDIKPGKRFHDIKPGKRFHDIKPGKRFHDIKPGKRFHDIKPGKRFHDIKPGKRFHDIKPGKRFHDIKPGKRFHDI  
AAKDFLKRLLVKDPRARLTAAQALSHPWVREGGEALEIPIDISVLNMRQFVKYGRKQFALRTLASTLNEEELADIKDQDFAIDVDKNGSISLEEMRQA  
LAKDLPWKLKESRVLEILQAIDSNTDGLVDFREFVAATLHVHQLEEDSDKQWLRSSQAFAFEKFDIDKDGYITTEELRMHTCLRGSVDPLEEADIDKDGKI  
SLPEFRLLRTASMSKSNVSSPSVHRRRF\*  
>Glyma.11G077300 Org\_Gmax peptide: Glyma.11G077300.1.p (1 of 1) PF13202//PF13499//PF14531 - EF hand  
(EF-hand\_5) // EF-hand domain pair (EF-hand\_7) // Kinase-like (Kinase-like) (PAC:30528853)  
MGICFSATKVSNGSNNNAASNRNRKGLAAPAPAPPAQPELEPVTGKQKQPSQAQRRRQVPEDSQKNPSKDKAGARRQGHVPCGKRTDFGYEKDFENR  
FSLGKLLGHGQFGYTYVIGIDKNGDRVAVKRLKESKMLVPIAVEDVKREVKILKELTGHENNVQFHNAFDDESIVYIVMELCEGGELLDRIILAKKDSRYT  
EKDAVVVRQMLKVAEECHLHGLVHRDMKPENFLFKSTKEDSPLKATDFGLSDFIKPGKRFQDIVGSAYYVAPEVLKRRKSGPESDVWSIGVITYILLCGR  
RPFWDKTEDGIFKEVLKRNKPDFRRKPWPTISNAKDFVKKLLVKDPRARYTAAQALSHPWVREGGEALEIPIDISVLNMRQFVKYGRKQFALRALAST  
LNEGELSDLKQDFAIDVDKNGSISLEEMRQALAKDQPKLKESRVLEILQAIDSNTDGLVDFTEFVAATLHVHQLEEHDSKQWLRSSQAFAFEKFDLDK  
GFITPEELRMHTGLRGSIDPLLEEADIDKDGKISLSEFRLLRTASMSRPI MSPSHRHRKI\*  
>Glyma.16G128600 Org\_Gmax peptide: Glyma.16G128600.1.p (1 of 4) PTHR24349:SF87 - CALCIUM-DEPENDENT  
PROTEIN KINASE 16-RELATED (PAC:30560415)  
MGTCSATKVSNGSHNAVTVNKNRKAAPKSETATANPLRHKASSRHVPCGKRTDFGYEKDFDQRYSLGKLLGHGQFGYTYVIGIDKANGDRVAVKRLK  
SKMVLPIAVEDVKREVKILKALTGHENNVQFYNAFEDDSYVYIVMELCEGGELLDRIILAKKDSRYTERDAVVVRQMLKVAEECHLHGLVHRDMKPENFL  
FKSTKEDSPLKATDFGLSDFIKPGKRFHDIKPGKRFHDIKPGKRFHDIKPGKRFHDIKPGKRFHDIKPGKRFHDIKPGKRFHDIKPGKRFHDIKPGKRFHDI  
KDFVKKLLVKDPRARLTAAQALSHPWVREGGEALEIPIDISVLNMRQFVKYGRKQFALRALASTLNEEELADIKDQDFAIDVDKNGSISLEEMRQALA  
KDLKDLKESRVLEILQAIDSNTDGLVDFREFVAATLHVHQLEEDSDKQWLRSSQAFAFEKFDLDKDGYITPEELRMHTCLRGSVDPLEEADIDKDGKISL  
PEFRLLRTASMGSQLPSSPSVHRRRF\*  
>Gorai.003G009500 Org\_Graimondii peptide: Gorai.003G009500.1 (1 of 3) PTHR24349:SF87 - CALCIUM-  
DEPENDENT PROTEIN KINASE 16-RELATED (PAC:26798333)  
MGACLSATKVSNGSNGNTTAHHRKATNAEKQSQKPNQVRCQPLKNKQKPEKQSGIIPWPKRTDFGYDKDFDQRYTIGKLLGHGQFGYTYVAIDKVN  
GDRVAVKIDKKNMILPIAVEDVKREVKILKALGHENNVQFYNAFEDDSYVYIVMELCEGGELLDRIILAKKDSRYSEKDAVVVRQMLKVAEECHLHGL  
VHRDMKPENFLFKSTRPDSPLKATDFGLSDFIKPGKRFHDIKPGKRFHDIKPGKRFHDIKPGKRFHDIKPGKRFHDIKPGKRFHDIKPGKRFHDIKPGKRFHDI  
RKPWPTISDDAKDFLKKMLVKDPRARLTAAQALSHQWVREGGNASDIPVIDISLNLQRFVKYGRKQFALRALASTLNEEELADLDKQDFAIDVDKSGS  
ISLEEMRQALAKDLPWKLKDSRVLEILQAIDSNTDGLVDFTEFVAALHVQNMEEHDCDKWQMLQAFAFEKFDVDRDGYITPEELRMHTGLRGSIDPLLE  
EADIDKDGKISLSEFRLLRTASMSRNVSSPSGNRNTQKL\*  
>Gorai.007G194500 Org\_Graimondii peptide: Gorai.007G194500.1 (1 of 3) PTHR24349:SF87 - CALCIUM-  
DEPENDENT PROTEIN KINASE 16-RELATED (PAC:26781420)

MGACLSTTKVIGSSNAAHHRKHQPSATTVTVNEKKESRKPNNQQGQRQVRSQQPLKVKGKPSSTRQTGIIPCGKRTDFGYHKDFDQRYTIGKLLGHG  
QFGYTYVAIDKAGNRVAVKKIDKNKMVLPMAVEDVKREVKILEALKGHENVVQFYNAFEDDSYVYIVMELCEGGELLDRI LAKKDSRYSEKDAAVVVRQ  
MLKVAEACHLHGLVHRDMKPNFLFKSTKEDSPLKATDFGLSDFIRPGKRFHDI VGSAYYVAPEVLKRRSGPESDVWSIGVITYILLCGKRPFWDKTEDG  
IFKEVLKPKDFRRKFPWPTISNGAKDFVKKLLVKDPRARLTAQAALSHRWVREGGNASDIPVDISVLNLRQFVKYSRLKQFALRALASTLNEEIIADLR  
DQFDAIDVDKNGSISLEEMRQALAKDLPWKMKPEPRVLEILQAIDSNTDGLVDFKEFVAALHVNQMEEHSDSKWQMSQAFAFEKFDVDRDGFITPEELRM  
HTGLRGSIDPLLEEADIDKDGKISLSEFRLLRTASISSRNVPCSSDQRNSRKL\*

>Gorai.011G098300 Org\_Graimondii peptide: Gorai.011G098300.1 (1 of 1) PF13499//PF13833//PF14531 - EF-  
hand domain pair (EF-hand\_7) // EF-hand domain pair (EF-hand\_8) // Kinase-like (Kinase-like)  
(PAC:26812417)

MGICLSTTKVFGTSSNPSDPDHHEEKQVPSPTTTTNAKKESHKPTVKHQQQQFKAKPSSSRKQGGNVPCGKRTDFGYRKFDFEKRYTTGKLLGHGQFGYTYV  
AIGNENGRVAVKKIEKMKMVLPIAVEDVKREVKILEALKGHENVVQFYNAFEDDSYVYIVMELCEGGELLDRI LAKKDSRYSEKDAAVVVRQMLKVAE  
CHLRGLVHRDMKPNFLFKSTKEDSPLKATDFGLSDFIRPGKRFQDIVGSAYYVAPEVLKRRSGPESDVWSIGVITYILLCGKRPFWDKTEDGIFREVLK  
NKPDRFRKFPWPTISDSAKDFVKKLLVKDPRARLTAQAALSHRWVREGGDASEIPIDISVLSNMRQFVKYSRLKQFALRALASTLNEEIIADLRDQFHAID  
VDKNGVISLEEMRQALAKDLPWKMKESRVLEILQAIDINTDGLVDFTEFIAAALHVNQMEEHSDSEKQMRSEAAFQKFDVDRDGFITPEELRMHTGLKGS  
IDPLLEEADIDRDGKISLEEFRRLLRTASISVRPNPSSHRTWKL\*

>GRMZM2G053868 Org\_Zmays peptide: GRMZM2G053868\_P01 (1 of 2) PTHR24349//PTHR24349:SF137 -  
SERINE/THREONINE-PROTEIN KINASE // SUBFAMILY NOT NAMED (PAC:31049975)

MGACFSSASAAPAGAAVDERRPSKEGDGKRRRAAGASPDAAAPRVVEFGYERDFEARYEVGRLLGHGQFGYTFAAATDRGSGDRVAVKRIDKAKMTRPVA  
VEDVKREVKILKALKGHNIVHFYNAFEDDSYVYIVMELCEGGELLDRI LAKKNSRYSEKDAAVVVRQMLKVAEACHLGRVHRDMKPNFLFKSNKEDS  
PLKATDFGLSDFIKPGKFFHDI VGSAYYVAPEVLKRRSGPESDVWSIGVITYILLCGRRPFWDKTEDGIFKEVLNRKPKDFRRKPWSISIPGAKDFVKRLL  
VKNPRARLTAQAALSHRWVREGGEASDIPVDISVLSNMRQFVKYSRFKQFALRALASTLNEEELSDLKQFDAIDIDKSGSISIEEMRHALAKDLPWRK  
GPRVLEIIQAIDSNTDGLVDFKEFVAATLHIHQMAELDSERWIRGQAFAFDFDLGDGYITPEELRMVQHTGLKGSIEPLLEEADIDKDGKISLSEFRK  
LLRTASMSNVPSRGPNNPQAL\*

>GRMZM2G157068 Org\_Zmays peptide: GRMZM2G157068\_P01 (1 of 2) PTHR24349//PTHR24349:SF137 -  
SERINE/THREONINE-PROTEIN KINASE // SUBFAMILY NOT NAMED (PAC:30986103)

MGACFSSASAAPAGAAVDERRPSKEGDGKRRRAAGASPDAAAPRVVEFGYERDFEARYEVGRLLGHGQFGYTFAAATDRGSGDRVAVKRIDKAKMTRPVA  
VEDVKREVKILKALKGHNIVHFYNAFEDDSYVYIVMELCEGGELLDRI LAKKNSRYSEKDAAVVVRQMLKVAEACHLGRVHRDMKPNFLFKSNKEDS  
PLKATDFGLSDFIKPGKFFHDI VGSAYYVAPEVLKRRSGPESDVWSIGVITYILLCGRRPFWDKTEDGIFKEVLNRKPKDFRRKPWSISIPGAKDFVKRLL  
VKNPRARLTAQAALSHRWVREGGEASDIPVDISVLSNMRQFVKYSRFKQFALRALASTLNEEELSDLKQFDAIDIDKSGSISIEEMRHALAKDLPWRK  
GPRVLEIIQAIDSNTDGLVDFKEFVAATLHIHQMAELDSERWIRGQAFAFDFDLGDGYITPEELRMVQHTGLKGSIEPLLEEADIDKDGKISLSEFRK  
LLRTASMSNVPSRGPNNPQAL\*

>GRMZM2G365035 Org\_Zmays peptide: GRMZM2G365035\_P01 (1 of 1) PTHR24349//PTHR24349:SF123 -  
SERINE/THREONINE-PROTEIN KINASE // SUBFAMILY NOT NAMED (PAC:30965679)

MGLCSSTAARAASDPGAAAAGDAAAAGKGRGIVACGKRTDFGYDKDFEVYSLGKLLGHGQFGYTFAAVDRASTERVAVKRIDKNKMVLPVAVEDVKRE  
VKILKALQGHENNVHFYNAFEDDNYVYIVMELCEGGELLDRI LAKKDSRYSEKDAAVVVRQMLKVAEACHLHGLVHRDMKPNFLFKSKKEDSPLKATDF  
GLSDFIKPGRQFRDIVGSAYYVAPEVLKRRSGPESDVWSIGVITYILLCGRRPFWDKTEDGIFKEVLKPKDFRRKPWSNITSSAKDFVQKLLVKDPRAR  
LTAQAALSHDWWVREGGKASEIPLDISVLHNMQRQFVKYSRFKQFALRALASTLNSEEMSDLRQFNAIDVDKNGTISLEELKQALAKDVPWRKGPVLEI  
IEAIDSNTDGLVDFEFAATLHVHQLVEHDTEKWSLSQAFAFDFDGDGYITPEELRMHTGMKGSIDPLLEEADIDKDGKISLSEFRLLKTASMSA  
RNVQTPRGVRS\*

>GSMUA\_Achr1G08900\_001 Org\_Macuminata peptide: GSMUA\_Achr1P08900\_001 (1 of 1) PF13202//PF13499//PF14531  
- EF hand (EF-hand\_5) // EF-hand domain pair (EF-hand\_7) // Kinase-like (Kinase-like) (PAC:32312516)

MGACFSADAKIRGGTSSAGTRSSRQQLQPEQKNKAPTQPPQKDRGSKRRSSGLVPCGRRTDFGYAKDFDSRYSVGKLLGHGQFGYTFVATENATGERV  
AVKRIDKNKMVLPVAVEDVKREVKILQALKGHENNVFNHAFEDDSYVYIVMELCEGGELLDRI LAKKDSRYSEKDAAVVVRQMLKVAEACHLHGLVHRD  
MKPNFLFKSKKEDSPLKATDFGLSDFIKPGKFFHDI VGSAYYVAPEVLKRRSGPESDVWSIGVITYILLCGRRPFWDRTEDGIFKEVLNRKPKDFRRKPW  
PTISNSAKEFVKKLLVKDPRVRLTAQAALSHRWVREGGNASEIPLDISVLNMRQFVKYSRFKQFALRALASTLNEEELADLKDQFQAIIDIDKSGSISLD  
EMRQALAKDIPWRKGPRLDILQAIDSNTDGLVDFTEFVAATLHVHQMEEHSDSEKWSRCKAAFAFEKFDVDRDGYITPEELRMHTGLKGSIEPLLEEAD  
DKDGKISLSEFRLLRTASMSNVPSRGPVNPQKF\*

>GSMUA\_Achr2G00480\_001 Org\_Macuminata peptide: GSMUA\_Achr2P00480\_001 (1 of 1) KOG0198//KOG0580//KOG0659  
- MEKK and related serine/threonine protein kinases // Serine/threonine protein kinase // Cdk  
activating kinase (CAK)/RNA polymerase II transcription initiation/nucleotide excision repair factor  
TFIIH/TFIIK, kinase subunit CDK7 (PAC:32304571)

MILPVAVEDVKREVKILQALKGHENNVFNHAYEDDSYVYIVMELCEGGELLDRI LAKKDSRYSEKDAAVVVRQMLKVAEACHLHGLVHRDMKPNFLFK  
STEENSPLKATDFGLSDFIEPQKFFHAI VGSAYYVAPEVLKRRSGPESDVWSIGVITYILLCGRRPFWDRTEDGIFREVLNRKPKDFRRKPWPSISNSAKD  
FVKLLVKDHPVRLTAQAALSHRWVREGGNALEIPLDISVLSNMQFVKYSRVRTLADSKLGLIDLFRRTSLELYRGSSLQVAAQRLQKRFIYCL\*

>GSMUA\_Achr5G18720\_001 Org\_Macuminata peptide: GSMUA\_Achr5P18720\_001 (1 of 1) PF13499//PF14531 - EF-  
hand domain pair (EF-hand\_7) // Kinase-like (Kinase-like) (PAC:32326160)

MGACLSSATQVSSRNKATAVAAAAAEGKHGQPGAKNEQQKQKPRARNCGKLVKAVARLSCGRRTNFGYERDFERRYSIGKLLGHGQFGYTFVATDKANG  
DRVAVKRIDKNKMILPVAVEDVKREVKILKALKGHENNVHFYNAFEDDSYVYIVMELCEGGELLDRI LAKKESRYSEKDAAVVVRQMLKVAEACHLHGLV  
HRDMKPNFLFKSTKEDCPLKATDFGLSDFIRPGKFFHDI VGSAYYVAPEVLKRRSGPESDVWSIGVITYILLCGRRPFWDKTEDGIYKEVLRTEPDRR  
KPWPNISSEAKDFVKKLLVKDPRARLTAQAALSHRWVREGGDALEIPLDISVLSNMRQFVKYSRFKQFALRALASTLNEEELADLKDQFHAIDVDKSGAI  
SLEEMRHALAKDLPWKLPKPCVSEIVQAMDSNTDGFIDFEFVAATLHVHQLVEHDNGKWSRLTAAFAFDFDVKNGYITPEELRMHTGLKGSIDPLLEE  
VDIDKDGKISLSEFRLLRTASMKPRSVPRQSTTRDRNTCFFTKQVFLVFLFLFQALIIISQSLSHN\*

>GSMUA\_Achr8G19290\_001 Org\_Macuminata peptide: GSMUA\_Achr8P19290\_001 (1 of 4) PTHR24349:SF87 - CALCIUM-  
DEPENDENT PROTEIN KINASE 16-RELATED (PAC:32309843)

MGACISSADPNSTAAAAAEEQQGRPEANRQQQQQRVDRDGGKEKAAAGGLVPCGRRTNFGYDRDFASKYITIGKLLGHGQFGYTFVATDKAHGDRVAVK

RIDKNKMILPIAVEDVKREVMILKALKGHENVVHFYNAYEDDSFVYIAMELCEGEGELLDRIILAKKNSRYTEKDAAVVVRQMLKVAAECHLHGLVHRDMKP  
ENFLFKSTKEDSPLKATDFGLSDFIRPGKFKQDIVGSAYYVAPEVLKRTSGPESDVWSIGVITYILLCGRRPFWNRTENGIKFEVLKTEPDFQRKPWPSI  
SNSAKDFVKKLLVKKDPVRLTAAQALSHSWVREGGDALEIPLDISVLSNMQRQFVKYSRKFQFALRALASTLNEEELADLKDQFDAIDVKSQGAISLEEMR  
HALAKDLPWKSKEHVLEILQAMDSNTDGLIDFEEFVAAALHMHQVLVELDSEKWRSLSQAAFDFKFDVDRDGYITPEELRMHTGLKGSIDPLLEEVDIDKD  
GKISLDEFRRLLKTASMSRNVNPRSTGH\*

>GSVIVG01018778001 Org\_Vvinifera peptide: GSVIVT01018778001 (1 of 1) PTHR24349:SF87 - CALCIUM-DEPENDENT  
PROTEIN KINASE 16-RELATED (PAC:17828604)

MGACLSATKVRSSNSNTTANAATKNTNTRPRGSSKTSNKNQKPKQEGDRNRSNQHRNPQPQKVKDRANGRRGTGIIPCGKRTDFGYAKDFDARYTIGKL  
LGHGQFGYTYVATDKANGDRVAVKRIEKNKMILPIAVEDVKREVKILEALTGHENVVQFHNAFEDDSYVYIVMELCEGEGELLDRIILAKKDSRYSEKDAK  
VVRQMLKVAAECHLHGLVHRDMKPENFLFKSTKEDSPLKATDFGLSDFIKPGKFKQDIVGSAYYVAPEVLRRKSGPESDVWSIGVITYILLCGRRPFWDK  
TEDGIFKEVLKKNKPDFRRKPWPTISNGAKDFVKKLLVKKDPARLTAQAALSHPWVREGGDASEIPIDISVLSNMREFVKYSHLKFQFALRALASTLDEEL  
ADLRDQFDAIDVDKNGSISLEEMRQALAKDLPWKMKESRVLEILQAIDSNTDGLVDFTEFVAATLHVHQLHEEHSKDKWRQSRQAAFDFKFDVDRDGYITPE  
ELKLTGLRGSIDPLLEEADIDKDGRIISLAEFRLLRTASISSRQVPSSSGFRNPRKI\*

>Kaladp0028s0017 Org\_Kfedschenkoi peptide: Kaladp0028s0017.1.p (1 of 4) PTHR24349:SF87 - CALCIUM-  
DEPENDENT PROTEIN KINASE 16-RELATED (PAC:35759078)

MGVCFSATKISGSSSSNGNRKSRRAAQQQPASTAPGRHKDKPRGDAEGRGRRDVGMRVPCGKRTDFGYLKNFDERYKIGKLLGHGQFGYTYVATDKSNGDR  
VAVKRIDKSKMVLPIAVEDVKREVKILQALTGHENVVQFYNAFEDDNYVYIAMELCEGEGELLDRIILAKKDSRYTEKDAAIIVRQMLKVAAQCHLHGLVHR  
DMKPENFLFKSTKEDSPLKATDFGLSDFIRPGRKFDHIVGSAYYVAPEVLKRRKSGPESDVWSIGVITYILLCGRRPFWDKTEDGIFKEVLNRKPDFRRKP  
WANISNSAKDFVKKLLVKKDPARLTAQAALSHSWVREGGSAEIPVDISVLSNMQRQFVKYSRQKIALRALASTLDEEELADLRDQFDAIDVDKNGSISL  
EEMRQALAKDLPWKLESRVLEILQAIDSNTDGLVDFTEFVAATLHVHQLHEEHSKDKWQSRQAAFDFKFDVDRDGYITPEELKLTGLKGSIDPLLEEAD  
IDKDGKISLPEFRLLRTASISSRAITSPRRVPSRKN\*

>Kalax.0174s0042 Org\_Klaxiflora peptide: Kalax.0174s0042.1.p (1 of 6) PTHR24349:SF87 - CALCIUM-  
DEPENDENT PROTEIN KINASE 16-RELATED (PAC:32567177)

MGVCFSATKISGSSSSNGNRKSRRAAQQQPASTAPGRHKDKPRGDAEGRGRRDVGMRVPCGKRTDFGYLKNFDERYKIGKLLGHGQFGYTYVATDKSNGDR  
VAVKRIDKSKMVLPIAVEDVKREVKILQALTGHENVVQFYNAFEDDNYVYIAMELCEGEGELLDRIILAKKDSRYTEKDAAIIVRQMLKVAAQCHLHGLVHR  
DMKPENFLFKSTKEDSPLKATDFGLSDFIRPGRKFDHIVGSAYYVAPEVLKRRKSGPESDVWSIGVITYILLCGRRPFWDKTEDGIFKEVLNRKPDFRRKP  
WANISNSAKDFVKKLLVKKDPARLTAQAALSHSWVREGGSAEIPVDISVLSNMQRQFVKYSRQKIALRALASTLDEEELADLRDQFDAIDVDKNGSISL  
EEMRQALAKDLPWKLESRVLEILQAIDSNTDGLVDFTEFVAATLHVHQLHEEHSKDKWQSRQAAFDFKFDVDRDGYITPEELKLTGLKGSIDPLLEEAD  
IDKDGKISLPEFRLLRTASISSRAITSPRRVPSRKN\*

>LOC\_Os02g03410 Org\_Osativa peptide: LOC\_Os02g03410.1 CAMK\_CAMK\_like.12 - CAMK includes  
calcium/calmodulin dependent protein kinases, expressed (PAC:33137776)

MGACFSSTATAAADGGSGKRQQRKGDHKGKLPDGGGGEKEKEARVEFGYERDFEGRYQVGRLLGHGQFGYTFAAATDRASGDRVAVKRIDKAKMVRPVA  
VEDVKREVKILKELKGHENIVHFYNAFEDDSYVYIVMELCEGEGELLDRIILAKKNSRYSEKDAAVVVRQMLKVAAECHLHGLVHRDMKPENFLFKSTKEDS  
PLKATDFGLSDFIKPGKFKFDHIVGSAYYVAPEVLKRRKSGPESDVWSIGVITYILLCGRRPFWDKTEDGIFKEVLNRKPDFRRKPWPGISSGAKDFVKKLL  
VKNPRARLTAQAALSHPWVREGGEASEIPVDISVLSNMQRQFVKYSRKFQFALRALASTLKEEELADLKDQFDAIDVKSQGSISIEEMRHALAKDLPWRK  
GPRVLEIIQAIDSNTDGLVDFEFAATLHVHQLHEEHSKDKWQSRQAAFDFKFDVDRDGYITPEELRMVQHTGLKGSIEPLLEEADIDKDGRIISLSEFRK  
LLRTASMSNLPSPRGPNNPQPL\*

>LOC\_Os07g22710 Org\_Osativa peptide: LOC\_Os07g22710.1 CAMK\_CAMK\_like.32 - CAMK includes  
calcium/calmodulin dependent protein kinases, expressed (PAC:33114003)

MGLCSSSARRDAGTPEGGNAGKNKDNAGRGIVACGKRTDFGYDKDFEARYALGLGHGQFGYTFAAVDRSSERVAVKRIDKKNMVLPIAVEDVKRE  
VKILKALQGHENVVHFYNAFEDDNYVYIVMELCEGEGELLDRIILAKKDSRYSEKDAAVVVRQMLKVAAECHLHGLVHRDMKPENFLFKSTKEDSSLKATDF  
GLSDFIRPGKHFDRDIVGSAYYVAPEVLKRRKSGPESDVWSIGVITYILLCGRRPFWDKTEDGIFKEVLKKNKPDFRRKPWPNITPCAKDFVQKLLVKKDPAR  
LTAQAALSHWVREGGQASDIPLDISVLSNMQRQFVKYSRKFQFALRALASTLNAEELSDLRDQFNADVDKNGTISLEELKQALAKDVPWRKGPVLEI  
VEAIDSNTDGLVDFEFAATLHVHQLVEHDTKWKSLSQAAFDFKFDVDRDGYITSDELRMQHTGLKGSIDPLLEEADIDRDKGKISLDEFRRLLKTASMS  
RNVQTPRSVHRS\*

>Lus10028459.g Org\_Lusitatissimum peptide: Lus10028459 (1 of 2) PTHR24349:SF87 - CALCIUM-DEPENDENT  
PROTEIN KINASE 16-RELATED (PAC:23166166)

MGSRRVSGTVFPFGKRTDFGYDKDFNKRYTIGKLLGHGQFGYTYVATDKNGDRVAVKRIDKGMILPIAVEDVKREVKILRQLAGHENVVHFVNAFEDDS  
YVFIIVMELCEGEGELLDRIILAKKDSRYSEKDAAVIVRQMLKVAAECHLHGLVHRDMKPENFLFKSTKEDSALKATDFGLSDYIKPGKFKFDHIVGSAYYVAP  
EVLQRKSGPESDVWSIGVITYILLCGRRPFWDKTEDGIFKEVLNRKPDFRRKPWPTISHSAKDFIRKLLVKKDPARLTAQAALSHPWVREGGDASEIPID  
ISVLSNMQRQFVKYSRQKIALRALASTINEEELADLKDQFDAIDDKNGSISLEEMRQALAKDLPWKLESRVLEILQAIDSNTDGLVDFEFAAALHV  
HQLQEHNSKWEERSQAAFDFKFDIDGDIITPEELRMHTGLRGSIDPLLEEADIDKDGKISLSEFRLLRTASMSRNLPSPSGHRNSRRL\*

>Manes.01G145800 Org\_Mesculenta peptide: Manes.01G145800.1.p (1 of 2) PTHR24349:SF87 - CALCIUM-  
DEPENDENT PROTEIN KINASE 16-RELATED (PAC:32358707)

MGVCFSTIKVSGSSSNNTTASAGHHYHRKERTDTTQSTTNNKQSSDQKNNKDDNNSTNNGTPESRQLQTKPKQQQQQQQQQHKVKEKQTSRRQSGV  
IPCGKRTDFGYAKDFDRRYMTGKLLGHGQFGYTYVATDKASGDRVAVKRIEKNKMVLPIAVEDVKREVKILRELAGHENVVQFYDAFEDDSYVYIVMELC  
EGGELLDRIILAKKDSRYTEKDAAVVVRQMLKVAAECHLHGLVHRDMKPENFLFKSTKVDSPKATDFGLSDFIKPGKFKFDHIVGSAYYVAPEVLKRRSGP  
ESDVWSIGVITYILLCGRRPFWDKTEDGIFKEVLNRKPDFRRKPWPSISNSAKDFVKKLLVKKDPVRLTAQAALSHPWVREGGDASEIPIDISVLSNMQR  
FVKYSRQKIALRALAGTLDGELADLRDQFDAIDVDRNGSISLEEMRQALAKDLPWKLESRVLEILQAIDSNTDGLVDFSEFVAALHVHQLHEEHS  
KWHMRSQSAFEKFDLKDGFITPEELRMHTGLKGSIDPLLEEADIDKDGKISLSEFRLLRTASISSQNLPSPSAHRNSWKI\*

>Manes.02G104800 Org\_Mesculenta peptide: Manes.02G104800.1.p (1 of 2) PTHR24349:SF87 - CALCIUM-  
DEPENDENT PROTEIN KINASE 16-RELATED (PAC:32333786)

MGACFSTIKISGNSNSTGAAAGHHYHRKEITNPNQSTTANRQSSQKNDNNNETRKSRLQTKQQQQQHKIKEKQTSRRQSGMIPCGKRTDFGYAKD  
FDRRVIGKLLGHGQFGYTYVATDKANGDRVAVKRIDKKNMVLPIAVEDVKREVKILQELAGHENVVQFYDAFEDDSYVYIVMELCEGEGELLDRIILAKK  
DSRYTEKDAAVIVRQMLKVAAECHLHGLVHRDMKPENFLFKSTKEDSPLKATDFGLSDFIKPGKFKQDIVGSAYYVAPEVLKRRSGPESDVWSIGVITYILL

LCGRFPFWDKTEDGIFKEVLRNKPDFRRKPWPSISNSAKDFVKKLLLVKDPVRVLTAAQALSHPWVREGGDASEIPIIDISVLNMRQFVKYSRLKQFALRA  
LASTLDDAELADLRDQFDAIDVDKNGSISLEEMRQALAKDLPWKMKDSRVLEILQAIDSNTDGLVDFSEFVAAALHVHQLEEHNSKQWHLRSQTAFKFD  
LDKDGYITPEELRMHTGLKGSIDPLLEEADIDKDGKISLSEFRLLRTASISSRTPSPSARRNSRMI\*

>Mapoly0098s0040 Org\_Mpolymorpha peptide: Mapoly0098s0040.1.p (1 of 1) PTHR24349:SF87 - CALCIUM-  
DEPENDENT PROTEIN KINASE 16-RELATED (PAC:33021029)  
MGGCLSAHPGRARAKAQVAGQDASAENSANASAPPQQPKVTPRKSPKNTPKKKTTERKRSRITVNHKDNSTQASIPGKRTNFGYEREFKTKYK  
LGKLLGHGQFGYTYAAVEISTGLKVAVKTIKKQMLLPIVDDVKREVEILGTLSGHENVVQFHAAAFEDDLVYIVMELCEGGEELLDRIILSKKDSRYSEK  
DAAKIVRQMLKVAARCHLNGVVRHDMKPENFLFKSQKEDSPLKATDFGLSDYIKIGKRFQDVVGSAYYVAPEVLRKRSKGPESDVWSIGVITYILLCGRRP  
FWAKEEQGIFNEVLKPKDFKEKPWPSISASAKDFVKKLLVVDPRARLTAAQALSHPWVREGGDASDIPLDISVLNMRQFVKYSRLKQFALRALASTLD  
GEEIADLRDQFDAIDMDKNGTITLLEEIKQALAKDTPWSVKETRVVEILKAMDSNRDGMVDFDEFVAATLHVHQLEESDTPKQRRSRAAFEKFDIDKDG  
ITAELKVVQLQATGKGNMTELEADTDGDRISLPEFQRLLRQASLSRSTNGSGSLQHFHRGK\*

>Medtr5g022030 Org\_Mtruncatula peptide: Medtr5g022030.1 (1 of 1) PTHR24349:SF87 - CALCIUM-DEPENDENT  
PROTEIN KINASE 16-RELATED (PAC:31091524)  
MGLCFSSSTKVVSGSNSNTTNDNRKRNRQSTTTDTTDTTATTAAQKQTAQRKGGSNETAQKKNHHQHHLRKEKTGSKHVPCGKRTDFGYEKDFDKRFS  
LGKLLGHGQFGYTYVGVKNSGDRVAVKRIEKAKMVLPIAVEDVKREVKILKELTGHENVVQFYNAFDDDSYVYIVMELCEGGEELLDRIILNKKDSRYTEK  
DAAVVVRQMLKVAACHLHGLVHRDMKPENFLFKSNKEDSALKATDFGLSDFIKPGKRFQDIVGSAYYVAPEVLRKRSKGPESDVWSIGVITYILLCGRRP  
FWDKTEDGIFKEVLRNKPDFRRKPWPTISNAAKDFVKKLLVVDPRARLTAAQALSHPWVREGGEASEIPIIDISVLNMRQFVKYSRLKQFALRALASTLD  
EGELSDLKQDQFDAIDVDKNGSISLEEMRQALAKDLPWKMKDSRVLEILQAIDSNTDGLVDFTEFVAATLHVHQLEEHSDKQQRSSQAAFEKFDIDKDG  
ITPEELRMHTGMRGSDIPLLEEADIDKDGKISLSEFRLLRTASISRNVTSPTRHRRI\*

>Migut.H01152 Org\_Mguttatus peptide: Migut.H01152.1.p (1 of 2) PTHR24349:SF87 - CALCIUM-DEPENDENT  
PROTEIN KINASE 16-RELATED (PAC:28953593)  
MGICFSTKKGSAPESTTTGNVHQQRNRSSATSKPSEFKTFTTASAKKQEGSQNNLKRTRDNHKNQQQKRSKHIKNSSKSTSGAIPCGKRTNFGYDKDF  
VKKYINIGKLLGHGQFGYTYVAIDKNSGDRVAVKRIEKNMVLPIAVEDVKREVKILKALAGHENVVHFYNAFEDDSYVYIVMELCEGGEELLDRIILSKKDS  
RYTEKDAIVVRQMLKVAACHLHGLVHRDMKPENFLFKSPKEDSHLAKATDFGLSDFIRPGKRFQDIVGSAYYVAPEVLRKRSKGAESDVWSIGVITYILL  
CGRPFWDKTEDGIFKEVLRNKPDFRRKPWPGISNAAKDFVKNLKVVDPRARLTAAQALSHPWVREGGEASEIPLDISVLNMRQFVKYSRQFQFALRAL  
ASTIDEELADLRDQFDAIDVDKNGSISLDEMRQALEKDLFWKMKDSRVLEILQAIDSNTDGLVDFSEFVAATLHVHQLEEHNSKQQRSSQAAFEKFDIDKDG  
DRDGFITPHELKMHGTGLKGSIDPLLEEADIDKDGRISEFRLLRTASMSRGGVST\*

>Migut.L00702 Org\_Mguttatus peptide: Migut.L00702.1.p (1 of 2) PTHR24349:SF87 - CALCIUM-DEPENDENT  
PROTEIN KINASE 16-RELATED (PAC:28935439)  
MGFKWEGGGVINAHWPYGNWNNNSRQQRHTQNSKTSKSRPSSGAI PCGKRTDFGYDKDFNSRYTIGKLLGHGQFGYTYVAVDKFNDRVAVKRIEK  
NKMVLPIAVEDVKREVRILKALAGHENVVQFYNAFEDDSYVYIAMELCEGGEELLDRIILSKKDSRYTEKDAIVVRQMLKVAACHLHGLVHRDMKPENFL  
FKSPKDDSSSLKATDFGLSDFIRPGKRFQDIVGSAYYVAPEVLRKRSKGPESDVWSIGVITYILLCGRRPFWDKTEDGIFKEVLRNKPDFRRKPWPGISNA  
KDFVVKILVVDPRARLTAAQALSHPWVREGGEASEIPLDISVLNMRQFVKYSRQFQFALRALASTLDDEELADLRDQFDAIDVDKNGSISLEEMRQALE  
KDI PWKIKDSRVLEILQAIDSNTDGLVDFSEFVAATLHVHQLEEHSSEKQWQRSQAAFEKFDIDKDGFI TPDELKMHTECLKGSIEPLLEEADIDKDGKIS  
LSEFRLLRTASLSSRGGVGT\*

>gene14609-v1.0-hybrid Org\_Fvesca peptide: mrna14609.1-v1.0-hybrid (1 of 1) PTHR24349:SF87 - CALCIUM-  
DEPENDENT PROTEIN KINASE 16-RELATED (PAC:27244231)  
MGGCLTTAKVTGSNNTNNNPATTVTAVVNRKQTRPQPAQTNNHHRPNEAQKHKHKSQSSRQKTGVI PCGKRTDFGYDKNFDRRYTIGKLLGHGQFGY  
TYVATDRSNGDRVAVKRIDKNKMILPIAVEDVKREVEILQALAGHENVVQFFNACEDDTYVYIVMELCEGGEELLDRIILEKKDSRYTEKDAIVVRQMLKV  
AAECHLHGLVHRDMKPENFLFKSKALDSPLKATDFGLSDFIKPGKRFQDIVGSAYYVAPEVLRKRSKGPESDVWSIGVITYILLCGRRPFWDKTEDGIFKE  
VLRNKPDFRRKPWPTISNAKDFVKKLLVVDPRARLTAAQALSHPWVREGGDASDIPLDISVLNMRQFVKYSRQFQFALRALASTLDNAEELADLRDQFD  
AIDVDKNGSISLEEMRQALAKDIPWKLKDSRVLEILEAIDSNTDGLVDFTEFVAATLHVHQLEEHSDKQQRSSQAAFEKFDIDRQGYITPEELRMHTGL  
KGSIDPLLEEADIDKDGKISLSEFRLLRTASMSRQVADPSGQRNSRQV\*

>orangel.lg008127m.g Org\_Csinensis peptide: orangel.lg008127m (1 of 1) PTHR24349:SF87 - CALCIUM-  
DEPENDENT PROTEIN KINASE 16-RELATED (PAC:18099036)  
MGICLSTTKVSGNSGNSNNNANHHRNANKEEAKRRHNRHNDTTHKHQHQHQRKAKNYQQLKTKQHKTNSRRQTGVIPCGKRTDFGYDKDFDRRYTI  
GKLLGHGQFGYTYVATDKANGDRVAVKRIEKNKMILPIAVEDVKREVKILQALAGHENVVQFYNAFEDDNYVYIAMELCEGGEELLDRIILAKMISTTLTSA  
WFLAIRKDSRYTEKDAIVVRQMLRVAAECHLHGLVHRDMKPENFLFKSAKEDSPLKATDFGLSDFIKPGKRFQDIVGSAYYVAPEVLRKRSKGPESDVWS  
IGVITYILLCGRRPFWDKTEDGIFKEVLRNKPDFRRKPWPSISNSAKDFVKKLLVVDPRARLTAAQALSHPWVREGGDASEIPIIDISVLNMRQFVKYSR  
LKQFALRALASTLDDEELADLRDQFDAIDVDKNGSISLEEMRQALAKDLPWKLKESRVLEILQAIDCNTDGLVDFSEFVAATLHVHQLEEHSDKQWHLRS  
QAAFEKFDIDRQGYITPEELRMHTGLKGSIDPLLEEADIDKDGRISEFRLLRTASISSRNVPSPSGHRNPRKL\*

>Oropetium\_20150105\_14239 Org\_Othomaeum peptide: Oropetium\_20150105\_14239A (1 of 1)  
PTHR24349//PTHR24349:SF137 - SERINE/THREONINE-PROTEIN KINASE // SUBFAMILY NOT NAMED (PAC:36005025)  
MGVCFSAAAAAARPSKEEKRRRGAASPDGQKTVRVEFGYDRDFEARYEVGRLLGHGQFGYTFAAATDRSDGDRVAVKRIDKAKMDRPAVEDVKREVKI  
LKALQGHENIVSFYNAFEDDSYVYIVMELCEGGEELLDRIILAKKNSRYSEKDAIVVRQMLKVAACHLHGLVHRDMKPEVLRNKPDFRRKPWPSISPGAK  
DFIKRLLVKNPRARLTAAQALSHPWVREGGEASEIPVDISVLNMRQFVKYSRQFQFALRALASTLNEEELADLRDQFDAIDVDKNGSISIEEMRHIDSN  
TDGLVDFREFVAATLHIHQMAELDSERWGLRQCQAARLKLDDGDGYITPEELRMHTGLKGSIEPLLEEADIDKDGKISLSEFRLLRTASMSNIPSPRGV  
PNPQALSNSGAAIGQEHGL\*

>Oropetium\_20150105\_26612 Org\_Othomaeum peptide: Oropetium\_20150105\_26612A (1 of 1)  
PTHR24349//PTHR24349:SF123 - SERINE/THREONINE-PROTEIN KINASE // SUBFAMILY NOT NAMED (PAC:36012113)  
MGLCTSSASADHTDDGAARAGKSGAGGRIACGKRTDFGYDKDFEARYLLGKLLGHVVDKREVKILKALRGHENVVHFYNAFEDDNYVYIVMELCEGG  
ELLDRIILAKKDSRYSEKDAIVVRQMLKVAACHLHGLVHRDMKPENFLFKSTKEDSPLKATDFGLSDFIKPGFEKQARFSSSETLAKHYAKCKRFCTKVT  
SQGSPCKTNCCTGVMGEGKASEIPLDISVLNMRQFVKYSRQFQFALRALASTLNAEELSDLRQDQFDAIDVDKNGTISLEELRQIDSNTDGLVDFEEFVA  
ATLHVHQLEVEHDEKWRSLSQAAFDKFDVVDGDGYITSDLELRMHTGLKGSIDPLLEEADVDKDGKISLYEFRLLRTASMSARIVQTPRGARINSELIKGV  
KH\*

>Pahal.A00155 Org\_Phallii peptide: Pahal.A00155.1 (1 of 1) PTHR24349//PTHR24349:SF137 - SERINE/THREONINE-PROTEIN KINASE // SUBFAMILY NOT NAMED (PAC:32529447)  
MGACFSSASAAPAGAERRPSKEDRKRGGASPEGAAKAAAAAAPPVRFVFGYERDFEARYEVGRLLGHGQFGYTF AATDRQSGDRVAVKRIKAKMT  
RPVAVEDVKREVKILKALKGHENIVHFYNAFEDDSYVYIVMELCEGGELLDRI LAKKNSRYSEKDAAVVVRQMLKVAEECHLRGLVHRDMK PENFLFKSN  
KEDSPLKATDFGLSDFIKPGKFFHDIVGSAYYVAPEVLKRRSGPESDVWSIGVITYILLCGRRPFWDKTEDGIFKEVLRNKPDFRRKPWSSISPGAKDFV  
KRLLVKNPRARLTAAQALSHPWVREGGEASEIPVDISVLSNMRQFVKYSRKFQFALRALASTLNEEELADLKDQFDAIDIDKSGSISIEEMRHALAKDLP  
WRLKGRPVLEIIQAIDSNTDGLVDFKEFVAATLHIHQMAELDSERWIRGQAAFSKFDLDGDGYITPEELRMHTGLKGSIEPLLEEADIDKDGRI SLSEF  
RKLRLTASMSNVPSRGP PPNPQAL\*

>Pahal.B01532 Org\_Phallii peptide: Pahal.B01532.1 (1 of 1) PTHR24349//PTHR24349:SF123 - SERINE/THREONINE-PROTEIN KINASE // SUBFAMILY NOT NAMED (PAC:32489711)  
MGLCSSTAAADTTRRPGAGAAAGKREKEKGRGIVACGKRTDFGYDKDFEARYSLGKLLGHGQFGYTF AAVDRASGDRVAVKRIKDKNMVLPVAVEDV  
KREVKILKALQGHENVVHFYNAFEDDNFVYIVMELCEGGELLDRI LAKKDSRYSEKDAAVIVRQMLKVAEECHLHGLVHRDMK PENFLFKSTKEDSPLKA  
TDFGLSDFIRPGKQFRDIVGSAYYVAPEVLKRRSGPESDVWSIGVITYILLCGRRPFWDKTEDGIFKEVLRNKPDFRRKPWPNITPAAKDFVQKLLVKDP  
RARLTAAQALSHDWVREGGKASEIPLDISVLHNMQRQFVKYSRKFQFALRALASTLNSEELSDLRDQFN AIDVDKNGTISLEELKQALAKDVPWRLKGRPV  
LEIIEAIDSNTDGLVDFEEFVAATLHVHQLVEHDTQKWKSLSQAAFDFKFDVGDGYITSDEL RMHTGMKGSIDPLEEADIDKDGKISLDEFRRLLKTAS  
MSARTVQTPRGV RMS\*

>Pavir.Aa03445 Org\_Pvirgatum peptide: Pavir.Aa03445.1.p (1 of 3) PTHR24349//PTHR24349:SF137 - SERINE/THREONINE-PROTEIN KINASE // SUBFAMILY NOT NAMED (PAC:30250634)  
MGACFSSASAAPAGAERRPSKEGKRRRGASPEGAAKAAAAAPPVRAEFVGRYERDFEARYEVGRLLGHGQFGYTF AATDRQSGDRVAVKRIKAKMTRPVAV  
EDVKREVKILKALKGHENIVHFYNAFEDDSYVYIVMELCEGGELLDRI LAKKNSRYSEKDAAVIVRQMLKVAEECHLRGLVHRDMK PENFLKSNKEDSP  
LKATDFGLSDFIKPGKFFHDIVGSAYYVAPEVLKRRSGPESDVWSIGVITYILLCGRRPFWDKTEDGIFKEAIIYLARLSFSDFCRQNTT VTNPLLV  
NLKSGDNLWPAQNAWTLVLRNKPDFRRKPWSSISPGAKDFVLRLLVKNPRARLTAAQALSHPWVREGGEASEIPVDISVLSNMRQFVKYSRKFQFALRA  
LASTLNEEELADLKDQFDAIDIDKNGSISIEEMRNALAKDLPWRLKGRPVLEIIQAIDSNTDGLVDFKEFVAATLHIHQMAELDSERWIRGQAAFSKFD  
LDGDGYITPEELRMQHTGLKGSIEPLLEEADIDKDGRI SLSEFRKLRLTASMSNVPSRGP PPNPQAL\*

>Pavir.Ab00120 Org\_Pvirgatum peptide: Pavir.Ab00120.1.p (1 of 3) PTHR24349//PTHR24349:SF137 - SERINE/THREONINE-PROTEIN KINASE // SUBFAMILY NOT NAMED (PAC:30234536)  
MGACFSSASAAPAGAERRPSKEDKGRGGASPEGAAKAAAAAPPVRFVFGYERDFEARFVGRLLGHGQFGYTF AATDRQSGDRVAVKRIKAKMTRPV  
AVEDVKREVKILKALKGHENIVHFYNAFEDDSYVYIVMELCEGGELLDRI LAKKNSRYSEKDAAVVVRQMLKVTAEECHLRGLVHRDMK PENFLFKSNKED  
SPLKATDFGLSDFIKPGKFFHDIVGSAYYVAPEVLKRRSGLES DVWSIGVITYILLCGRRPFWDKTEDGIFKEVLRNKPDFRRKPWSSISPGAKDFV KRL  
LVKNPRARLTAAQALSHPWVREGGEASEIPVDISVLSNMRQFVKYSRKFQFALRALASTLNEEELADLKDQFDAIDIDKNGSISIEEMRNALAKDLPWRL  
KGRPVLEIIQAIDSNTDGLVDFKEFVAATLHIHQMAELDSERWIRGQAAFSKFDLDGDGYITPEELRMQHTGLKGSIEPLLEEADIN KDGRI SLSEFR  
KLLRTASMSNVPSRGP PPNPQAL\*

>Pavir.Ba02369 Org\_Pvirgatum peptide: Pavir.Ba02369.1.p (1 of 3) PTHR24349//PTHR24349:SF123 - SERINE/THREONINE-PROTEIN KINASE // SUBFAMILY NOT NAMED (PAC:30291111)  
MGLCSSTAAADTTRRPGAAAGKREKRDGKRGIVACGKRTDFGYDKDFEARYSLGKLLGHGQFGYTF AAVDRASGDRVAVKRIKDKNMVLPVAVEDVKRE  
KILKALQGHENVVHFYNAFEDDNFVYIVMELCEGGELLDRI LAKKDSRYSEKDAAVIVRQMLKVAEECHLHGLVHRDMK PENFLFKSTKEDSPLKATDFG  
LSDFIRPGKQFRDIVGSAYYVAPEVLKRRSGPESDVWSIGVITYILLCGRRPFWDKTEDGIFKEVLRNKPDFRRKPWPNITPAAKDFVQKLLVKDPARL  
TAAQALSHDWVREGGKASEIPLDISVLHNMQRQFVKYSRKFQFALRALASTLNSEELSDLRDQFN AIDVDKNGTISLEELKQALAKDVPWRLKGRPVLEII  
EAIDSNTDGLVDFEEFVAATLHVHQLVEHDTQKWKSLSQAAFDFKFDVGDGYITSDEL RMHTGMKGSIDPLEEADIDKDGKISLDEFRRLLKTASMSAR  
TVQTPRGV RMS\*

>PGSC0003DMG400003564 Org\_Stuberousum peptide: PGSC0003DMP400006361 Calcium-dependent protein kinase  
CPK4 (PAC:37426490)  
MGNICFSSSKVSGSNSNTPTSTNTATVNGHRNRSSAKPVSAATTNTSRKQEGSHYNRQKGDNGGVKQQTKNVKNHNRTRQSGVIPCGRKRTDFGYDKDFDK  
KFTIGKLLGHGQFGYTYVATDKSNGNRVAVKRIEKKKMVVP IAVEDVKREVKILKALAGHENVVDFYNAFEDDNVYVYIVMELCEGGELLDRI LAKKDSRY  
TEKDAIVVQMLKVAEQCHLHGLVHRDMK PENFLFKSPKEDSPLKATDFGLSDFIRPGKFFQDIVGSAYYVAPEVLKRRSGPESDVWSIGVITFILLCG  
RRPFWDKTEDGIFKEVLRNKPDFRRKPWPTISNSAKDFVKKLLVKDPRARLTAAQALSHPWVREGGDASEIPLDISVLSNMRQFVKYSRLKQFALRALAS  
TLDEEELADVRDQFSAIDVDKNGVISLEEMRQALAKDLPWKMKESRVLEIIQAIDSNTDGLVDFPEFVAATLHVHQLVEHNLKQWQRRSQTAFAKDFDVR  
DGFITPEELRMHTGLKGSIDPLEEADIDKDGKISLSEFRLLRTASISSRMVTSPTVRGSRKI\*

>PGSC0003DMG400022562 Org\_Stuberousum peptide: PGSC0003DMP400039123 Calcium-dependent protein kinase  
(PAC:37463999)  
MGSCFSSSKVSGSNSNTPTSTNTATNTNTVNVHPNRRETSKAPSTTVVNSRNQESGNSYNRGKGNINQKNQKQPRNSQQNVKPSRRQGGVIPCGRKRTD  
FGYDKDFEKRYTIGKLLGHGQFGYTYVATDKSSGDRVAVKRIEKNKMVLP IAVEDVKREVKILKALGHENVVQFYNSFEDDNVYVYIVMELCEGGELLDRI  
ILSKKDSRYTEKDAIVVVRQMLKVAEECHLHGLVHRDMK PENFLFKSTKEDSPLKATDFGLSDFIRPGKFFQDIVGSAYYVAPEVLKRRSGPESDVWSIG  
VITYILLCGRRPFWDKTEDGIFKEVLRNKPDFRRKPWPNISNSAKDFVKKLLVKDPRARLTAAQALSHPWVREGGDASEIPLDISVLSNMRQFVRYSHLK  
QFALRALASTLDEEELADLRDQFSAIDVDKNGVISLEEMRQALAKDLPWKMKESRVLEIIQAIDSNTDGLVDFPEFVAATLHVHQLVEHNSAKWQRRSQA  
AFEKFDVDRDGFITPEELKMHMTGLRGSIDPLEEADIDKDGKISLSEFRLLRTASMSPTVDRSRGM\*

>Phvul.002G108700 Org\_Pvulgaris peptide: Phvul.002G108700.1.p (1 of 2) PTHR24349:SF87 - CALCIUM-  
DEPENDENT PROTEIN KINASE 16-RELATED (PAC:37176995)  
MGICFSATKVSNSNAGASNRNRKWSAPMTAQVTLQPLTAQKQSSHKQSSHKQSSHQRRRVPEDSRKNPRAKEKTSGRRQGGNLP CGKRTDFGY  
EKDFDKKFSGLKLLGHGQFGYTYVGDIDKANGDRVAVKRIEKNKMVLP IAVEDVKREVKILKELTGHENVVQFYNAFEDDSYVYIVMELCEGGELLDRI  
KAKDSRYTEKDAAVVVRQMLKVAEECHLHGLVHRDMK PENFLFKSTREDSPLKATDFGLSDFIKPGKFFQDIVGSAYYVAPEVLKRRSGPESDVWSIGVIT  
YILLCGRRPFWDKTEDGIFKEVLRNKPDFRRKPWPTISNSAKDFVKKLLVKDPRARYTAAQALSHPWVKEGGEALEIPIDI SVLNNMRQFVRYSRKQFA  
LRALASTLNEEELSDLKDQFDAIDVDKNGSISLEEMRLAALQDLPWKLESRVLEIIQAIDSNTDGLVDFPEFVAATLHVHQLVEHNSFKWQRRSQAAFE  
KFDLKDGYITPEELRMHTGLRGSIDPLEEADIDKDGKISLSEFRLLRTASISSRNVLSPNQLRKRM\*

>Phvul.003G261700 Org\_Pvulgaris peptide: Phvul.003G261700.1.p (1 of 2) PTHR24349:SF87 - CALCIUM-



DEPENDENT PROTEIN KINASE 16-RELATED (PAC:37145240)  
MGICYSATKVSFVNGSPVTVKKNRRAAAPEKRTPTANTERHKASSRHVPCGKRTDFGYEKHFDRYTLGKLLGHGQFGYTYVVIDKANGDRVAVKREK  
SKMVQPIAVEDVKREVKILKALTGHENNVQFYDAFEDDSVYIVMELCEGELLDRILAKKESRYTEKDAVVVRQMLKVAEACHLHGLVHRDMKPENFL  
LKSTKEDSPLKATDFGLSDFIKPKGKFKHDIVGSAYYVAPEVLKRKSGPQSDVWSIGVITYILLSGRRPFWDKTEGIFKEVLRKPKDFHRKPWTTISNAA  
IDFVKLLVKDPRARLTAAQALSHPWVREGGEASEIPIDISVLSNMRQFVKYSRLKQFALRALASTLNEEELADLKDQFDAIDVDKNGSISLEEMRQALA  
KDLPWKLKEPRVLEILQAIDSNTDGLVDFSEFVAATLHVHQLEDDSDKWQLRSQAAFEKFDIDKDGYSPEELKMHTGLRGSIDPLLEEADIDKDGKISL  
SEFRLLRTASMSSQVSSPTVYKRRI\*

>Potri.005G113600 Org\_Ptrichocarpa peptide: Potri.005G113600.1 (1 of 2) PTHR24349:SF87 - CALCIUM-  
DEPENDENT PROTEIN KINASE 16-RELATED (PAC:27031190)  
MGACFSTIKVSGSNSNNVHSRKEPTKPTKTTKATTATRKKQEVVHHHQNNKNVNNEAEKLLKVKKEQSSKAIPCGKRTDFGYDKDFDMRYTIGKLLG  
HGQFGYTYVAIDKANGDRVAVKRIEKNKMVLPPIAVEDVKREVKILRELTGHENNVQFYNALEDDSVYIVMELCEGELLDRILSKKDSRYTEKDAVVV  
RQMLKVAEACHLHGLVHRDMKPENFLFKSTKEDSPLKATDFGLSDFIKPKGRKQFQDIVGSAYYVAPEVLKRKSGPESDVWSIGVITYILLGRRPFWDKTE  
DGIFKEVLRKPKDFRRKPWPTISTSADKDFVNKLLVKDPRARLTAAQALSHPWVREGGVASEIPIDISVLSNMRQFVKYSRLKQFALRALASTIDEEELAD  
LKDQFDAIDVDKNGAISLEEMRQALAKDLPWKLKESRVLEIVQAIDSNTDGLVDFTEFVAALHVHQLEHNSKQWQLRSQAAFEKFDIDRDGYITPEEL  
RMHTGLRGSIDPLLEEADIDKDGKISLSEFRLLRTASMSSRNVPSPSGHRKSHKI\*

>Potri.007G057600 Org\_Ptrichocarpa peptide: Potri.007G057600.1 calcium-dependent protein kinase family  
protein; CDPK family protein; calcium-dependent protein kinase family protein; CDPK family protein; [  
ortholog of At4g36070,At2g17890,At5g66210,] (PAC:27015393)  
MGACFSTINISGNSNNNTKANHNKREPTKPTKTRTTKAATRKKQEVVHHHQINKNVNNEAEKLLKVKKEQSSKAIPCGKRTDFGYDKDFDIRYTIGKLL  
GHGQFGYTYVATDKANGDRVAVKRIDKNKMVLPPIAVEDVKREVKILQELTGHENNVQFHNAFEDDSVYIVMELCEGELLDRILAKKDSRYTEKDAVV  
VRQMLKVAEACHLHGLVHRDMKPENFLFKSTKEDSPLKATDFGLSDFIKPKGRKQFQDIVGSAYYVAPEVLKRKSGPESDVWSIGVITYILLGRRPFWDKTE  
EDGIFKEVLRKPKDFRRKPWPTISTSADKDFVQKLLVKDPRARLTAAQALSHPWVREGGDASEIPIDISVLSNMRQFVKYSRLKQFALRALASTIDEEELA  
DLKDQFDAIDVDKNGAISLEEMRQALAKDLPWKLKESRVLEIVQAIDSNTDGLVDFTEFVAALHVHQLEHNSKQWQLRSQAAFEKFDIDRDGYITPEE  
LRMHSGLRGSVDPLEEADIDKDGKISLSEFRLLRTASMSSQNVDPSPGHRNSKLL\*

>Pp3c15\_5120 Org\_Ppatens peptide: Pp3c15\_5120V3.1.p (1 of 4) PTHR24349:SF87 - CALCIUM-DEPENDENT PROTEIN  
KINASE 16-RELATED (PAC:32926634)  
MGGCCSKSSVVEQRQAPHRTEANGKEEAAYQNKGRDLPVKVGGDPPEKKERDSPEHKGRLDVENTQGSPEKKARETPDKQVGTAKRPIPERKQSRIS  
AANLKDNDQSHSQPLGKRTNFGYERDFKEKYSGLKLLGHGQFGYTYVATEKATGNKVAACIEKKQMKLPISVEDVKREVKILRTLSGHENNVQFFAAFED  
DDLVIIVMELCEGELLDRILAKKDSRYSEKDAKIVRQMLNVAARCLNGLVHRDMKPENFLFKSKDSDSPLKATDFGLSDYIKPKGRFRDVGSAAYV  
APEVLRKSGPESDVWSIGVITYILLGRRPFWDKTEAGIFNEVLKPKDFREKWPSTITASAQDFVKKLLRDKDPMMLTAAQALSHPWVKEGGDASDMP  
LDISVLSNMRQFVKYSRLKQALRALASTLESDEIRDLRQDFDAMDVDRNGITILEEKHALQKDRPWAVKESRVLEILQAMDSNADGMIDDFEFVAATL  
HVHQLEQANSKQWQSRKAASFQDFVDGDFITAEELKIATGLKGSVGTILLEEADSDKDGKISLSEFQKLLHQASFGSRTNTDHNQRQT\*

>Pp3c9\_4620 Org\_Ppatens peptide: Pp3c9\_4620V3.1.p (1 of 4) PTHR24349:SF87 - CALCIUM-DEPENDENT PROTEIN  
KINASE 16-RELATED (PAC:32913651)  
MGNCKKSSVAEEVTRKYKAPEQWITKNEPSAQTHQKQKQNGATHTKPRSRKPPGVVHSRNRSSKVEKLAESKQPEPWKSPPESTADRKKKPRVRAAIN  
GKDNKEMAPLGRKRTNFGYGRDFKSKYTLGKLLGHGQFGYTYVAIEKSTGSRVAVKTIKQKMTLPISVEDVKREVKILRTLSGHENNVQFYASFEDDDLV  
YIVMELCEGELLDRILAKKDSRYSEKDAKIVRQMLNVAARCLNGLVHRDMKPENFLFKSTSEDSPLKATDFGLSDYIRPGNRFDVVGSAAYVVAPEV  
LKKKSGPESDVWSIGVITYILLGRRPFWDKTEKGFIDEVLKKNPDYGEKFPWPTISSAKDFVKKLLVKDPAARLTAAQALSHPWAKEGGDALDIPDIS  
VLSNMRQFVKYSRLKQALRALASTLDSSDIADLQDQFNAIDIDRNGKITLEEMREALQKDRPWSIQESRIVEILQAMDSNSDGLVDFDEFVAATLHVHQ  
LEETDSEKQWQSRQAASFQDFDGDGYITADELKIATGLNGSMDSILVEADIDGDKKISLSEFQKLLRQASLGSRRTNEHHTLVTHNHRKC\*

>Prupe.7G168400 Org\_Ppersica peptide: Prupe.7G168400.1.p (1 of 1) PTHR24349:SF87 - CALCIUM-DEPENDENT  
PROTEIN KINASE 16-RELATED (PAC:32104836)  
MGGCFSTVKVSGSNSNNNTTAPTANHNKQSTASSQSTTPPVKQEQRRTRNPNEMPRKQLANKPKGKPNRRQTGVI PCGKRTDFGYDKNFDRYTIKLLG  
GHGQFGYTYVATDKANGDRVAVKRIDKNKMILPIAVEDVKREVKILKELAGHENNVQFYNAFEDDSYVIVMELCEGELLDRILEKKDSRYTEKDAVV  
VRQMLKVAEACHLHGLVHRDMKPENFLFKSKALDSPLKATDFGLSDFIKPKGRKQFQDIVGSAYYVAPEVLKRKSGPESDVWSIGVITYILLGRRPFWDKTE  
EDGIFKEVLRKPKDFRRKPWPTISTSADKDFVKKILVKDPRARLTAAQALSHPWVREGGNASEIPIDISVLSNMRQFVKYSRLKQFALRALASTLNAEELS  
DLKDQFDAIDVDKNGSISLEEMRQALAKDLPWKLKESRVLEILEAIDSNTDGLVDFTEFVAATLHVHQLEEHDSKQWQSRRAAFEKFDIDKDGFIITPEE  
LKMHTGLRGSIDPLLEEADIDKDGKISLSEFRLLRTASISSKTVTSPPGQRNARKV\*

>SapurV1A.0130s0480 Org\_Spurpurea peptide: SapurV1A.0130s0480.1.p calcium-dependent kinase  
(PAC:31426758)  
MGVCFSTIKVSGSNSNNVHNHRKEATKQQTKTATAPTRKKQEVVDHQNNKNVNNEEKKLLKVKKEQSSKAIPCGKRTDFGYDKDFGMRYTIGKLLG  
HGQFGYTYVATDKANGDRVAVKRIEKNKMILPIAVEDVKREVKILRELTGHENNVQFYNALEDDSVYIVMELCEGELLDRILSKKDSRYTEKDAVVV  
RQMLKVAEQCHLHGLVHRDMKPENFLFKSTKEDTLPKATDFGLSDFIKPKGRKQFQDIVGSAYYVAPEVLKRKSGPESDVWSIGVITYILLGRRPFWDKTE  
DGIFKEVLRKPKDFRRKPWPTISTSARDVFNKLLVKDPRARLTAAQALSHPWVREGGSAEIPIDISVLSNMRQFVKYSRLKQFALRALASTINEEELAD  
LKDQFDAIDVDKNGAISLEEMRQALAKDLPWKLKESRVLEILEAIDSNTDGLVDFTEFVAALHVHQLEEHNSKQWQSRRAAFEKFDIDRDGYITPEEL  
RMHTGLRGSIDPLLEEADIDKDGKISLSEFRLLRTASMSSRNVPSPSGQRKSQKI\*

>SapurV1A.0515s0090 Org\_Spurpurea peptide: SapurV1A.0515s0090.1.p calcium-dependent kinase  
(PAC:31451114)  
MGACFSTIKVSGSNSNNNTNHNKREKSTKPTSTATTKQEVVLSHHQINKNVNNEAEKLLRVREKQSSKAIPCGKRTDFGYDKDFDIRYTIGKLLGHGQFG  
YTYVATDKANGDRVAVKRIEKNKMVLPPIAVEDVKREVKILQELTGHENNVQFHNAFEDDSVYIVMELCEGELLDRILAKKDSRYTEKDAVVVRQMLK  
VAEACHLHGLVHRDMKPENFLFKSTKEDSPLKATDFGLSDFIKPKGRKFRDMVGSAYYVAPEVLKRKSGPESDVWSIGVITYILLGRRPFWDKTEGDFK  
EVLNRKPKDFRRKPWPTISTSADKDFVKKLLVKDPRARLTAAQALSHPWVREGGDASEIPIDISVLSNMRQFVKYSRLKQFALRALASTIDEEELADLKDQF  
DAIDVDKNGAISLEEMRQALAKDLPWKLKESRVLEIVQAIDSNTDGLVDFTEFVAALHVHQLEEHNSKQWQLRSQAAFEKFDIDRDGYITPEELRMHSG  
LRGSIDPLLEEADIDKDGKISLSEFRLLRTASMSSQNVPSGQKNSKLL\*

>Seita.1G102100 Org\_Sitalica peptide: Seita.1G102100.1.p (1 of 1) PTHR24349//PTHR24349:SF137 -

SERINE/THREONINE-PROTEIN KINASE // SUBFAMILY NOT NAMED (PAC:32695536)  
MGACFSSASAAPAGAERRPSKEDKRRRGGASPEGATKAAAAAAPVVRVEFGYERDFEARYEVGRLLGHGQFGYTFAATDRQSGDRVAVKRIDKAKMTR  
PVAVEDVKREVKILKALKGHENIVHFYNAFEDDSYVYIVMELCEGEGELLDRI LAKKNSRYSEKDAAVVVRQMLKVAAECHLRGLVHRDMKPENFLFKSNK  
EDSPLKATDFGLSDFIKPGKFFHDI VGSAYYVAPEVLKRRSGPESDVWSIGVITYILLCGRRPFWDKTEDGIFKEVLRNPKDFRKRPPWSSISPGAKDFVK  
RLLVKNPRARLTAAQALSHPWVREGGEASEIPVDISVLSNMQRQFVKYSRFKQFALRALASTLNEEELADLKDQFDAIDIDKSGSISIEEMRHALAKDLPW  
RLKGRVLEIIQAIDSNTDGLVDFKEFVAATLHIHQMAELDNERWIRGQAFAFSKFDLDGDGYITPEELRMMQHTGLKGSIEPLLEEADIDKDGRISLSE  
FRKLLRTASMSNVPSRPGPPNPQAL\*

>Seita.2G111700 Org\_Sitalica peptide: Seita.2G111700.1.p (1 of 1) PTHR24349//PTHR24349:SF123 -  
SERINE/THREONINE-PROTEIN KINASE // SUBFAMILY NOT NAMED (PAC:32718390)  
MGLCFSSSTAADSPRPAAGGAAGKRERSRGIVACGKRTDFGYDKDFEARYSLGKLLGHGQFGYTYAAVDRASGDRVAVKRIDKNKMVLPVAVEDVKRE  
VKILKALQGHENNVHFYNAFEDDNYVYIVMELCEGEGELLDRI LAKKDSRYSEKDAAVVVRQMLKVAAECHLRGLVHRDMKPENFLFKSTKEDSPLKATDF  
GLSDFIRPGKQFRDIVGSAYYVAPEVLKRRSGPESDVWSIGVITYILLCGRRPFWDKTEDGIFKEVLKKNKPDFRKRPPWPNITPAAKDFVQKLLVKDPRAR  
LTAAQALSHDWVREGGKASEIPLDISVLHNMQRQFVKYSRFKQFALRALASTLNEEELSDLRDQFNADVDKNGTISLEELKQALAKDVPWRKGRVLEI  
IEAIDSNTDGLVDFEFAATLHVHQLVEHDTEKWKLLSQAAFDFKFDVVDGDGYITSDLELRMHTGMKGSIDPLLEEADIDKDGIKSLDEFRRLLKTASMSA  
RIVQTPRGIRMS\*

>Sevir.1G101400 Org\_Sviridis peptide: Sevir.1G101400.1.p (1 of 1) PTHR24349//PTHR24349:SF137 -  
SERINE/THREONINE-PROTEIN KINASE // SUBFAMILY NOT NAMED (PAC:32664287)  
MGACFSSASAAPAGAERRPSKEDKRRRGGASPEGATKAAAAAAPVVRVEFGYERDFEARYEVGRLLGHGQFGYTFAATDRQSGDRVAVKRIDKAKMT  
RPVAVEDVKREVKILKALKGHENIVHFYNAFEDDSYVYIVMELCEGEGELLDRI LAKKNSRYSEKDAAVVVRQMLKVAAECHLRGLVHRDMKPENFLFKSN  
KEDSPLKATDFGLSDFIKPGKFFHDI VGSAYYVAPEVLKRRSGPESDVWSIGVITYILLCGRRPFWDKTEDGIFKEVLRNPKDFRKRPPWSSISPGAKDFV  
KRLLVKNPRARLTAAQALSHPWVREGGEASEIPVDISVLSNMQRQFVKYSRFKQFALRALASTLNEEELADLKDQFDAIDIDKSGSISIEEMRHALAKDLP  
WRLKGRVLEIIQAIDSNTDGLVDFKEFVAATLHIHQMAELDSERWIRGQAFAFSKFDLDGDGYITPEELRMMQHTGLKGSIEPLLEEADIDKDGRISLS  
EFRKLLRTASMSNVPSRPGPPNPQAL\*

>Sevir.2G117500 Org\_Sviridis peptide: Sevir.2G117500.1.p (1 of 1) PTHR24349//PTHR24349:SF123 -  
SERINE/THREONINE-PROTEIN KINASE // SUBFAMILY NOT NAMED (PAC:32636163)  
MGLCFSSSTAADSPRPAAGGAAGKRERSRGIVACGKRTDFGYDKDFEARYSLGKLLGHGQFGYTYAAVDRASGDRVAVKRIDKNKMVLPVAVEDVKRE  
VKILKALQGHENNVHFYNAFEDDNYVYIVMELCEGEGELLDRI LAKKDSRYSEKDAAVVVRQMLKVAAECHLRGLVHRDMKPENFLFKSTKEDSPLKATDF  
GLSDFIRPGKQFRDIVGSAYYVAPEVLKRRSGPESDVWSIGVITYILLCGRRPFWDKTEDGIFKEVLKKNKPDFRKRPPWPNITPAAKDFVQKLLVKDPRAR  
LTAAQALSHDWVREGGKASEIPLDISVLHNMQRQFVKYSRFKQFALRALASTLNEEELSDLRDQFNADVDKNGTISLEELKQALAKDVPWRKGRVLEI  
IEAIDSNTDGLVDFEFAATLHVHQLVEHDTEKWKLLSQAAFDFKFDVVDGDGYITSDLELRMHTGMKGSIDPLLEEADIDKDGIKSLDEFRRLLKTASMSA  
RIVQTPRGIRMS\*

>Sobic.002G114800 Org\_Sbicolor peptide: Sobic.002G114800.1.p (PAC:37951044)  
MGLCSSCTAARAASDPGAAAAGDAAAAAAGKRGIVACGKRTDFGYDKDFEARYSLGKLLGHGQFGYTFAAVDRASSERVAVKRIDKNKMVLPVAVEDVK  
REVKILKALQGHENNVHFYNAFEDDNYVYIVMELCEGEGELLDRI LAKKDSRYSEKDAAVVVRQMLKVAAECHLRGLVHRDMKPENFLFKSTKEDSPLKAT  
DFGLSDFIKPGKQFRDIVGSAYYVAPEVLKRRSGPESDVWSIGVITYILLCGRRPFWDKTEDGIFKEVLKKNKPDFRKRPPWPNITSSAKDFVQKLLVKDPR  
VRLTAAQALSHDWVREGGKASEIPLDISVLHNMQRQFVKYSRFKQFALRALASTLNEEELSDLRDQFNADVDKNGTISLEELKQALAKDVPWRKGRVLEI  
EIEAIDSNTDGLVDFEFAATLHMHLVEHDTEKWKLSQAADFDFKFDVDRDGYITSDLELRMHTGMKGSIDPLLEEADIDKDGIKSLDEFRRLLKTASMS  
SARNVQTPRGVRS\*

>Sobic.004G025000 Org\_Sbicolor peptide: Sobic.004G025000.1.p (PAC:37929853)  
MGACFSSASAAPAGAADDRPSKDDGKRRRRAAGASPEAAAAAPVVRVEFGYERDFEARYEVGRLLGHGQFGYTFAATDRASGDRVAVKRIDKAKMTR  
PVAVEDVKREVKILKALKGHENIVHFYNAFEDDSYVYIVMELCEGEGELLDRI LAKKNSRYSEKDAAVVVRQMLKVAAECHLRGLVHRDMKPENFLFKSNK  
EDSPLKATDFGLSDFIKPGKFFHDI VGSAYYVAPEVLKRRSGPESDVWSIGVITYILLCGRRPFWDKTEDGIFKEVLRNPKDFRKRPPWSSISLGAKDFVK  
RLLVKNPRARLTAAQALSHPWVREGGEASDI PVDISVLSNMQRQFVKYSRFKQFALRALASTLNEEELADLKDQFDAIDIDKSGSISIEEMRHALAKDLPW  
RLKGRVLEIIQAIDSNTDGLVDFKEFVAATLHIHQMAELDSERWIRGQAFAFSKFDLDGDGYITPEELRMMQHTGLKGSIEPLLEEADIDKDGIKSLSE  
FRKLLRTASMSNVPSRPGVNPQAL\*

>Solyc02g083850.2 Org\_Slycopersicum peptide: Solyc02g083850.2.1 (1 of 1) PTHR24349:SF87 - CALCIUM-  
DEPENDENT PROTEIN KINASE 16-RELATED (PAC:36156830)  
MGNICFSSSKVSGSNSNTPTSTTTNTAAVNGHRNRSSANPVSAITNTSRKQEGSHYNRQKGDNDGGVQQRNSQKNVKNHNRKQSGIIPCGKRTDFGY  
DKDFDNKFTIGKLLGHGQFGYTYVATDKSNGNRVAVKRIEKKKMVPIAIVEDVKREVKILKALAGHENVDFYNAFEDDNYVYIVMELCEGEGELLDRI L  
KKDSRYTEKDAAVVVRQMLKVAAEQCHLHGLVHRDMKPENFLFKSSKEDSSLKATDFGLSDFIRPGKFFQDIVGSAYYVAPEVLKRRSGPESDVWSIGVIT  
FILLCGRRPFWDKTEDGIFKEVLRNPKDFRKRPPWPTISNSAKDFVKLLVKDPRARLTAAQALSHPWVREGGDAASEIPLDISVLSNMQRQFVKYSRLKQFA  
LRALASTLDEEELADLRDQFSAIDVDKNGVISLEEMRQALAKDLPWKMKESRVLEILQAIDSNTDGLVDFPEFVAATLHVHQLVEHNLLKWQRSQTAFE  
KFDVDRDGFITPEELRMMHTGLKGSIDPLLEEADIDKDGIKSLSEFRLLRTASISSRMVNSPTVRGSRKI\*

>Solyc03g033540.2 Org\_Slycopersicum peptide: Solyc03g033540.2.1 (1 of 1) PTHR24349//PTHR24349:SF137 -  
SERINE/THREONINE-PROTEIN KINASE // SUBFAMILY NOT NAMED (PAC:36136238)  
MGSFCFSSSKVSGSNSNTPTSTNTTNTAVNAHQNRRETSKAPSTTVNPRNQEGCRDKGNINQKNQKQPRNSQQNVKPSRRQGGVIPCGRKRTDFGY  
HKDFEKRYTIGKLLGHGQFGYTYVATDKSNGNRVAVKRIEKKKMVLPVIAIVEDVKREVKILKALAGHENVDFYNSFEDDNYVYIVMELCEGEGELLDRI L  
KKDSRYTEKDAAVVVRQMLKVAAECHLRGLVHRDMKPENFLFKSTKEDSPLKATDFGLSDFIRPGKFFQDIVGSAYYVAPEVLKRRSGPESDVWSIGVIT  
YILLCGRRPFWDKTEDGIFKEVLRNPKDFRKRPPWPNISNSAKDFVKILVKDPRARLTAAQALSHPWVREGGDAASEIPLDISVLSNMQRQFVKYSRLKQFA  
LRALASTLDEEELADLRDQFSAIDVDKNGVISLEEMRQALAKDLPWKMKESRVLEILQAIDSNTDGLVDFPEFVAATLHVHQLVEHNSTKWQRSQAFA  
KFDVDKDGFITPEELKMMHTGLRGSIDPLLEEADIDKDGIKSLSEFRLLRTASMSPTVRDRSGM\*

>Sphfalx0060s0096 Org\_Sfallax peptide: Sphfalx0060s0096.1.p (1 of 1) PF13202//PF13405//PF13499//PF14531  
- EF hand (EF-hand\_5) // EF-hand domain (EF-hand\_6) // EF-hand domain pair (EF-hand\_7) // Kinase-like  
(Kinase-like) (PAC:32604604)  
MGSCCTKTSAAQEEQNEHKFAHQNYDQNGAQKHQEQQLQHVHANNKHTPQHNNHRRHAREQERSVVEDLQQPAQAAKKPPAAVAAPQSDRRKTRRRIV

GSNIRDNTSVPLGKKTNFGYQRDFKAKYTLGKLLGHGQFGYTYVAIQKATGMRVAVTKIEKKQMTLPISVEDVKREVKILDTLSGHENVVQFIASFEDNN  
LVYIVMELCEGEGELLDRIILAKKESRYSEKDAARIVRQMLNVAACHLNGVVRHMMPENFLFKSTKEDSPLKATDFGLSDFIKPGKRFHVDVGSAYYVAP  
LVYIKRKSQSGPESDAWSIGVITYILLGRRPFWEKTEAGIFNEVLKPKKPDFREKWPPTISASAKDFVKKLLVKDAFARLTAAQALSHFPWREGGDASDIPLD  
ISVLSNMREFVYKSHLQKIALRALASTLDSDEISDLRDQFDAMDMRNGTITILEEMRIALQKQDPWVLKESRVLEILQAMDTNRDGLVDFDEFVAATLHV  
HQLKETDAKKWQMLQAADFDFDGDGYITAIELKIAMGLKGSMEAILCEADLDGGRISLPEFQNLVQRASLGRNNDNDVDMQQRHRRHREAPLPC  
ENQMMM\*VH\*

>Sphfalx0184s0017 Org\_Sfallax peptide: Sphfalx0184s0017.1.p (1 of 1) PF13499//PF14531 - EF-hand domain  
pair (EF-hand\_7) // Kinase-like (Kinase-like) (PAC:32623020)

MGSCCTKSLAEQEERNGKQEQKFSHQHYHGQVTHQEQHVHNNHYHAREQGAHYHHYAKEQEHVVELQQQPPGGQEGGKKEPPPPAVVHRHSEGGKTK  
VSSSIKDNNSVPLGKKTNFGYARDFAKAYTLGKLLGHGQFGYTYVAVEKATGMRVAVTKIEKKQMLPISVEDVRRVVKILETLSGHENVVQFIASFED  
DDLVIYVIMELCEGEGELLDRIILAKKDSRYSEKDAARIVRQMLNVAACHLNGVVRHMMPENFLFKSTKEDSPLKATDFGLSDYIRPGKRFHVDVGSAYYV  
APEVLKRRKSGPESDVWSIGVITYILLGKRRPFWDKTEAGIFNEVLKPKKPDFRDKPWPTVSASAKDFVKKLLVKDAFARLTAAQALSHFPWAREGGDASDIP  
LDISVLSNMREFVYKSRKQIALRALASTLDADEISDLRDQFDAMDMRNGTITILEEMRIALQKDRPWI VKESRVLEILQAMDSNRDGLVDFNEFVAATL  
HVHQLEETDSEKQWMLQAADFDFDGDGYITANELKIATGLKGSMEAILDEADMDGGRISLPEFKNLLRQASLGRNNDNDVHTQHQRVQEAHE  
ARIIS\*

>Sphfalx0226s0012 Org\_Sfallax peptide: Sphfalx0226s0012.1.p (1 of 1) PF06293//PF13499//PF13833 -  
Lipopolysaccharide kinase (Kdo/WaaP) family (Kdo) // EF-hand domain pair (EF-hand\_7) // EF-hand domain  
pair (EF-hand\_8) (PAC:32617120)

MGCCVSKNPPVHQTRQREAGAGGQKQEIIVHGPGGHRQQLPPDHGIVNHQLHHDVGEQIHNRRGDGEMKKKAVAAASAAAVKPIRKSSRITAASCDIQNNAP  
LHPTAPLQGRKINFGYGRDFDEKYSYLGKLLGHGQFGYTYVGTAKTSNEVAVKCIKMKMLPVEVEDVKREVRILKTLGSHKNNVQFYAFAFEDDFQVYI  
VMELCEGEGELLDRIILAKKNHRYTEKDAKVVREMLNVVARCHLNGVVRHDIKPENFLFKSQDEADAPLKAVDVDFGLSDFIRPGKRFHVDVGSAYYVAPEVLK  
RRSGPESDVWSIGVIAIYILLGCVRPFWDKTEAGIFNEVQKPKNPTQKWPRI SDSAKEFVKKLEKDPHLRLTAAQALSHFWREGGVDASDMLDIAVL  
SNMREFVYKSRKQIALRALASTLTKSEIILNLQDQFDAIDVDQNGTITILEEMKNALSADKFWVREPRISEILQAMDANMDGMI DFDEFVATMHHMQLE  
ENNSKQWRSRASAFAKLMDGDGYVTADELKVAMGLKSSVILLDEADTRDGRISLPEFQKLLHQASLGRSRTNHNHPHHRH\*

>Spipol16G0021400 Org\_Spolyrhiza peptide: Spipol16G0021400 Calcium dependent protein kinase 16  
(PAC:31516197)

MGACFSTATKAASAAGDPQGPQQAHKPREAQRSTSSQSQNRKQGNQYQREKQEKRASGAIPCGKRTNFGYARDFESKYTTGKLLGHGQFGYTFVATQK  
ATGDRVAVKRIDKSKMLHSVAVEDVKREVKILQALTGHEENVVQFHNAFEDDSYVYIVMELCEGEGELLDRIILAKKDSRYSEKDAAVVVRQMLKVAEECHLH  
GLVHRDMKMPENFLFKSTKEDSPLKATDFGLSDFIKPGRKFHDIVGSAYYVAPEVLKRRKSGPESDVWSIGVITYILLGRRPFWDKTEGIFKEVLRKPKD  
FRKFPWPNISSSAKDFVTLLVVKDPRARLTAAQALSHFPWREDGDASEIPLDISILNIREFVYKSRKQIALRALASTLNPEEMANLRDQFDAIDVDKN  
GAISLEEMRHAKDLPWKLKEPRVMEILQAMDSNTDGLVDFDEFVAATLHVHQLEEHDSKQWRSRQAFAFEKFDVDRDGFITPEELRVHTGLKSSIEPL  
LEEADIDKDGKISLPEFRLLRSVSSRNVPAPSAARNSRKM\*

>Spipol17G0030600 Org\_Spolyrhiza peptide: Spipol17G0030600 Calcium-dependent protein kinase  
(PAC:31514565)

MGACLSNATKVTGCSSTATSGSATDPPRQHKDRPPREGKSPSTQDDHHEHQRRERDQGRRTTGIIPCGKRTSFGYGRDFLSRYTIGKLLGRGQFGHTFV  
ATDKANGDKVAVKRIDKKNMILPIAVEDVKREVKILQALTGHEENVVQFHNAFEDDSYVYIVMELCEGEGELLDRIILAKKDSRYTEKDAKVVVRQMLKVAEK  
CHLHGLVHRDMKMPENFLFKSTKEDSPLKATDFGLSDFIKPGRFRDIVGSAYYVAPEVLKRRKSGPESDVWSIGVITYILLGRRPFWDKTEGIFKEVLK  
NKPDRFRKWPWSISPSAKDFVKKLLVKDPRARLTAAQALSHFPWREDGDASEIPLDISVLSNMREFVYKSRMKQIALRALASTLPEELADLRDQFNAID  
VDKNGSISLEEMRHAKSKDI IWRLEPRVLEILQAIDSNTDGLVDFDEFVAATLHVHQLEKQDSRKLWRSRQAFAFEKFDVDRDGFITPEELRMHTGMKGS  
IDPLLEEADIDKDGKISLSEFRLLRNASMGSHNVL\*

>Spipol1G0063900 Org\_Spolyrhiza peptide: Spipol1G0063900 Calcium dependent protein kinase 18  
(PAC:31521583)

MGACFSDPTKVGSSSSSTGSVAVKNLAGKHQKQRTQKKSNGKQQRKQEQNPRNQNHREKGEVKRTNGVVPYGRKRTNFGYPRDFESKYEIGKLL  
GHGFGYTFVAIDKANGNHVAVKRINKQKMHHTAVEDVKREVKILRALTGHEENVVQFYNAFEDDSYVYIVMELCEGEGELLDRIILAKKDSRYAEKDAAI  
VRQMLRVAEACHLRLGLVHRDMKMPENFLFKSALENSPLKATDFGLSNFIVPGRKFDYIVGSAYYVAPEVLKQRSQSGPESDVWSIGVITYILLGRRPFWDK  
EEGIFKEVLRKPKDFRFRKWPWSISNSAKDFVGLKLVKDPARARLTAAQALSHFPWREGGDASEIPLDISVLSNMREFVYKSCFKQFALRALASTIQEELA  
DLHDQFDAIDVDKNGSISLEEMRHAKDVPWRTKEPRVLEILRAIDSNTDGRVDFEEFVAATLHVHQLEHDSKWLRSRQAFAFEKFDLDDGDFITPEE  
LRTHIGLRGSDPLLEEADIDKDGKISLSEFRLLRTASMNS\*

>ThecclEG000206 Org\_Tcacao peptide: ThecclEG000206t1 Calcium dependent protein kinase 16 (71%U)  
(PAC:27435494)

MGACLSSTTKVSGSSNAGVNRHKEQQSTTTTNEKESQKPSGQQGQQQQVVRNSQPLVKVKGKPSARRQSGIIPCGKRTDFGYHKDFDKRYTIGKLLGH  
GQFGYTYVATDKANGDRVAVKIEKNMVLPIAVEDVKREVKILEALKGHEENVVQFYNAFEDDSYVYIVMDFALAI SLVLALQLYTFISILLSLDSIICL  
LSDARLCEGEGELLDRIILANQCYFLSVDVSNVSTTSSTLCLPSSVRKDSRYSEKDAAVVVRQMLKVAEACHLRLGLVHRDMKMPENFLFKSTRADSPLKATDF  
GLSDFIRPGKRFQDIVGSAYYVAPEVLKRRSGPESDVWSIGVITYILLGRRPFWDKTEGIFKEVLKPKDFRFRKWPPTISNSAKDFVKKLLVKDPQAR  
LTAAQALSHFPWREGGNASEIPVDISVLSNLRQFVKYSRLKQFALRALAGLTNEEIIADLRDQFDAIDVDKNGSISLEEMRQALAKDLPWKLKESRVLEI  
LQAIDSNTDGLVDFTEFVAALHVNQMEEHSDKWQQRSAFAFEKFDVDRDGFITPEELRMHTGLRGSIDPLLEEADIDKDGKISLSEFRLLRTASMNS  
KNVPSPSGQRNTCKL\*

>Thhalv10003969m.g Org\_Esalsugineum peptide: Thhalv10003969m (1 of 1) PF13499//PF14531 - EF-hand domain  
pair (EF-hand\_7) // Kinase-like (Kinase-like) (PAC:20198771)

MGVCFSAIRVTFGASSSSRRSSQTNRKCKDKAYKAPIKEENDKPKRRTGAIIPCGKRTDFGYAKDFHDQYSIGKLLGHGQFGYTYVAIHKSNDRVA  
VKRLDKSKMVLPIAVEDVKREVKILKALSGHENVVQFYNAFEDEYVYIVMELCEGEGELLDRIILSKKDSRYSEKDAAVVVRQMLKVAEACHLGLVHRDM  
KMPENFLFKSAKLDSPKATDFGLSDFIKPGRKFHDIVGSAYYVAPEVLKRRSGPESDVWSIGVITYILLGRRPFWDKTEGIFKEVLRNPKDFRFRKWP  
TISDSAKDFVKKLLVKDPRARLTAAQALSHAWVREGGNATDIPVDISVLSNLRQFVYRSRLKQFALRALASTLDEAEISDLRDQFDAIDVDKNGVILEE  
MRQALAKDLPWKLKDSRVAEILQAIDSNTDGLVDFTEFVAALHVNQMEEHSDKWQQRSAFAFEKFDIDKDGYITPEELRMHTGLRGSIDPLLEADID  
RDGKISLHEFRLLRTASISSQRVSPACHRNPR\*

>Thhalv10022615m.g Org\_Esalsugineum peptide: Thhalv10022615m (1 of 1) PF13202//PF13499//PF14531 - EF hand (EF-hand\_5) // EF-hand domain pair (EF-hand\_7) // Kinase-like (Kinase-like) (PAC:20202464)  
MGLCFSSAKVSGRHNRSRPNPNPPLPLTVAKHRPPQTPCSFMTVSIQKDHRTQPRRPAKKTTPQTQTRQTPTHGRAREKVSNNHNGRRHGAEIPY  
GKRIDFGYAKDFDHRYSIGKLLGHGQFGYTYVATDKKTGDRVAVKIKDKAKMTIPIAVEDVKREVKILQALTGHENVVRFYNAFEDKNSVYIVMELCEGG  
ELLDRILAKKDSRYSERDAAVVVRQMLKVAEECHLRGLVHRDMKPENFLFKSTEEASPLKATDFGLSDFIKPGKFFHDIVGSAYYVAPEVLKRRSGPESD  
VWSIGVISYIILCGRRPFWDKTEDGIFKEVLRNKPDRRKPWPTISNSAKDFVKKLLVKDPRARLTAQAALSHPWVREGGDATEIPIDISVLNMRQFVK  
FSRLKQFALRALATTLDDEELADLRDQFDAIDVDKNGAISLEEMRQALAKDHPWKLKDAVAEILQAIDSNTDGFVDFEFAAALHVNQLEEHDSSEKWQ  
QRSRAAFEKFDIDGDGYITAEELRMHTGLKGSIEPLLEEADIDNDGKISLHEFRLLRTASIKSRNVRNPPGYLISRKV\*  
>Thhalv10027243m.g Org\_Esalsugineum peptide: Thhalv10027243m (1 of 1) PF00069//PF13202//PF13833 -  
Protein kinase domain (Pkinase) // EF hand (EF-hand\_5) // EF-hand domain pair (EF-hand\_8)  
(PAC:20193139)  
MGLCFSSPKATRHGTSRRKPNPTPEMPKQPQKARKKVSNNKNNKIQWRHGGETPYGKGVDFGYAKDFDNHYTIGKLLGHGQFGYTYVATDNVN  
EDRVAVKRIDKAKMTVPIEVEDVKREVKILQALGGHENNVAFHNVFEDKNVYIVMELCEGGELLDRILAKKDSRYSEKDAVVVRQYANFLFKSTGEDS  
SLKATDFGLSDFIKPGMKFQDIVGSAYYVAPEVLKRRSGPESDVWSIGVITYIILCGRRPFWDKTDGIFNEVMRKKPDKFTIPWPTISNSAKDFVKKLL  
VKEPLARLTAQAALSHPWVREGGEASEIPIDISVLNMRQFVKFSRLKQALRALATTIDEDELDRDQFDAIDIDKNGSISLEEMRQALAKDVPWKLK  
DARVAEILQAIDSNTDGLVDFTEFVAVTLHVHQLLEEHDCQKQQRRAAFDKFDIDRDGYITPEELRLQTLGKGSIEPLLEEAEVDKDGRIISHEFRLL  
RSASLKSIVKSPPGYQLS\*  
>Tp57577\_TGAC\_v2\_gene18198 Org\_Tpratense peptide: Tp57577\_TGAC\_v2\_mRNA18832 (1 of 1) PTHR24349:SF87 -  
CALCIUM-DEPENDENT PROTEIN KINASE 16-RELATED (PAC:35968253)  
MGICFSSTKVVSGSNSNTTNNENRKRNSTSTTKTENAPVTTTSATASTTRKRQVPSNQRKGSSEEAQKTHQSRHKDKVSSRVPCGKRTDFGYEKDFDK  
RFSGLKLLGHGQFGYTYVGVDSKNGDRVAVKRLEKAKMVLPIAVEDVKREVKILKELTGHENVVQFYNAFEDDSYVYIVMELCEGGELLDRILGKKSRY  
TEKDAVVVRQMLKVAEQCHLHGLVHRDMKPENFLFKSNKDDSAKATDFGLSDFIKPGKRFQDIVGSAYYVAPEVLKRRSGPESDVWSIGVITYIILCG  
RRPFWDKTEDGIFKEVLRNKPDRRKPWPTISNAAKDFVRKLLVKDPRARLTAQAALSHPWVREGGEASEIPVDISVLNMRQFVKYSRLKQFALRALAS  
TLNEGEFSDLKQFDAIDVDKNGAISLEEMRQALAKDLPWKLKESRVEILQAIDSNTDGLVDFTEFVAATLHVHQLLEEHDSSEKWQQRSAAFDKFDLKD  
DGFITPEELRMHTGMRGSDIPLEEADIDKDGKISLPEFRLLRTASIGSRNVSSPTHRNRMM\*  
>Zm00008a008476 Org\_ZmaysPH207 peptide: Zm00008a008476\_P01 (1 of 1) PTHR24349//PTHR24349:SF123 -  
SERINE/THREONINE-PROTEIN KINASE // SUBFAMILY NOT NAMED (PAC:37205832)  
MGLCSSTAARAASDPGAAAAGDAAAANKGRGIVACGKRTDFGYDKDFEVRYSLGKLLGHGQFGYTFAAVDRASTERVAVKRIDKNKMLVPVAVEDVKRE  
VKILKALQGHENNVHFNAFEDDNYVYIVMELCEGGELLDRILAKKDSRYSEKDAVVVRQMLKVAEECHLHGLVHRDMKPENFLFKSKKEDSPLKATDF  
GLSDFIKPELLPTFLSAAFCQVLFGRMGWFLAEQWHEHSVVLKPKDFRRKPWSNITSSAKDFVQKLLVKDPRARLTAQAALSHDWWREGGKASEIPLDIS  
VLHNMQRQFVKYSRKFQFALRALASTLNSEEMSDLRDQFNAIDVDKNGTISLEELKQALAKDVPWRLKGRVLEIIEAIDSNTDGLVDFEFAATLHVHQ  
LVEHDTKWKLSQAADFDFVDRDGYITPDELRMHTGMKGSIDPLEEADIDKDGKISLDEFRRLLKTASMSARNVQTPRGVRSK\*  
>Zm00008a020829 Org\_ZmaysPH207 peptide: Zm00008a020829\_P01 (1 of 1) PTHR24349//PTHR24349:SF137 -  
SERINE/THREONINE-PROTEIN KINASE // SUBFAMILY NOT NAMED (PAC:37208826)  
MEVARSLVCRGTGKMPRVAVEDVKREVKILKALKGHQNIHVFNAFEDDSYVYIVMELCEGGELLDRILAKKNSRYSEKDAVVVRQMLKVAEECHLRGL  
VHRDMKPENFLFKSNKEDSPLKATDFGLSDFIKPGKFFHDIVGSAYYVAPEVLKRRSGPESDVWSIGVITYIILCGRRPFWDKTEDGIFKEVLRNKPDRR  
KRPWSSISPAGKDFVKKLLVKNPRARLTAQAALSHPWVREGGEASDIPVDISVLNMRQFVKYSRKFQFALRALASTLNEEELSCLKDQFDAIDIDKSGS  
ISIEEMRHAKADLPWRLKGRVLEI IQAIDSNTDGLVDFKFEVAATLHIHQMAELDSERWIRCAAFSKFDLDGDGYITPEELRMHTGLKGSIEPLLE  
EADIDKDGKISLSEFRKLLRTASMSNVSPRGPNNPQAL\*  
>Zosma34g00020 Org\_Zmarina peptide: Zosma34g00020.1 Calcium dependent protein kinase 16 (PAC:33182282)  
MGNCIVFRQTKSVVTAQTSHRPNTPARQHRHEQRKHQDGMKVASGKMDFGYDKNFGERYVGLKLLGHGQFGYTFVGTDKINGDRVAVKRIDKNKMM  
GVKDVKREVNILRELTGHENVVQFHNAIEDDTYVYIVMELCEGGELLERILSKKNSRYSEIDA AEIVRQMLKVAEQCHLHGLVHRDMKPENFLLESKEED  
SRLKATDFGLSDYIKPEKFFSDIVGSAYYVAPEVLKRRSGPESDVWSIGVITYIILCGRRPFWGRTEGDFNSVLKPKDFKSKPWHISDSAKDFVKKL  
LVKSPSVRLTASQALSHPWVRENGDASEIPLDISVLSNLRKFMTYNGLKQFALGALASTLNKEELADIRDQFDVIDVDKNGTISLDEMSQALAKYRPWKL  
KERHVREILQAIDTNTDGLVDFSEFVATLHVHQMVEVHDSKWKLLSQTAFDQFDKDKGFIPTPEELKMHAGLLGSINSLLEEADTDKDGKLSLAEFRKL  
LKPANIHQPSPPSKRRRHQ\*  
>Zosma72g00360 Org\_Zmarina peptide: Zosma72g00360.1 Calcium-dependent protein kinase (PAC:33169652)  
MGACATKVSASSRRSNTASKTKPNGDLEEKTEGTSGEKVEVPPTQKKQKGRAVTVPCGKQTNFGYDRDFTRRYSIGKLLGHGQFGYTFVATDKN  
DDRVAVKRISKNMTPPIAVEDVKREVQILRELTGHENVVQFHNAIEDDSFYVYIVMELCEGGELLDRILSKKESRYTENDA AVVRQMLKVAEECHLHGL  
VHRDMKPENFLFISKNENSMLKATDFGLSDYIKPGKNFRDIVGSAYYVAPEVLKRRSGPQSDVWSIGVITYIILCGRRPFWNKTEDGIFKEVLRNKPDRR  
RKPWHSISESAKDFVNKLLVKNPDRARLTAQAALSHPWVREGGDALEIPLDISVLSNLRDFVKYSRLKQFALRVMARLTDDEELNLRDQFNAIDTDGN  
GIISPEEMKQALEKNRPWKLKPKVKEIVQAIDSNTDGYVDFPEFVAATLHIHQMEERDSKWKALSKTAFDKFDIDKNGFITHELDKMHAGLRGSDILI  
LEEADIDKDGKISLSEFRKLFRTASIQTR\*  
>Zosma8g01530 Org\_Zmarina peptide: Zosma8g01530.1 Calcium-dependent protein kinase 28 (PAC:33183934)  
MGNCFRSHIRIINRSTSSKNATATATADDSKSPKNAAVLKTQTPRNNDRKLEHKKSTNSVPGKLTDFGYFKDFDKNYAIGKLLGHGQFGYTFIATNK  
STHESVAVKRIEKKMVLPIAVEDVRREVKILKQLTGHEVNVQFHNAIEDDAYVYIVMELCEGGELLDRILSKKDSRYTEKDAVVVRQMLKVAEECHLH  
GLVHRDMKPENFLFQSKREDSVLKATDFGLSDFIKPGKFFDIVGSAYYVAPEVLRRRSGPESDAWSIGVITYIILCGKREFWPKTEGDFKEVLRNKPDRR  
FKRNPWPTISDSAKDFVNKLLVKNPRARLTAQAALSHPWVREGGNASEIPLDISVLSNLRDFVKYSRMKQALRALASTVDDDELADLRDQFDAIDVDKS  
GTISFEELKALAKDLPWRVKEARVVEILEAIDSNTDGLVDFREFVATLHVHQMHEHDSSETWNSRCKAAFQKLDVDGNGFLTPEELRLHTGIKGSIDMLL  
DEADTDKDGKISLIEFLTTLKASTPRQRRCVSDHRNSSHK\*

## File S2. Amino acid sequences of representative group I, II, and III CDPKs across the plant lineage.

This text file includes 327 FASTA-formatted sequences retrieved from the Phytozome 12 BLAST tool following a query for group I, II, and III CDPKs in 12 species spanning the plant lineage (*M. polymorpha*, *P. patens*, *S. fallax*, *S. moellendorffi*, *A. trichopoda*, *O. sativa*, *A. thaliana*, *V. vinifera*, *R. comunis*, *B. rapa*, *T. cacao*, and *M. truncatula*).

```
>105020 Org_Smoellendorffii peptide: 105020 (1 of 1) PTHR24349:SF167 - CALCIUM-DEPENDENT PROTEIN KINASE
10-RELATED (PAC:15411844)
MGNCCATPGIKRKRKPNPFAQDGFKGTGPPKVKIMKEHAPGMSVQQGVDINEKYVLGKELGRGEFGITYLCTGKESQEDLACKSISKSKLRTAVDIDDVR
REVQIMHHLPRHPNVVALKDVFDGNAVHLMELCEGGEFDRIIARGHYSERAAAGITRTIVEVVQVCHKHGMHRDLKPNFLFANKKENSPLKAIDF
GLSVFFRPGERFSEIVGSPYYMAPEVLKRNYPGEIDVWSAGVILYILLSGVPPFWAESEQGVAQAILRGQIEFKRDPWPKISENAKSLVQNMMPDPKQR
YTAQQVLDHPWLQNAKKASNVPLGDPVVRNRLKQFSAMNKLKRALQMITELLSGDEVESYKDMFKVMDQKNEGSITYDELKVGLAKIGSQAESAELLM
EAADVNNKGTLDYQEFVAMMIHIQRMDNDEYLRKAFNRDLKDESGFIEKEELREALYDDRGASETMIDDILQEVLDLKDQKISYEEFASMMRTGTDWRK
ASRHYSRGRYNSLSIRLLRDGSLQSGNYEKR*
>105846 Org_Smoellendorffii peptide: 105846 (1 of 1) PTHR24349:SF126 - CALCIUM-DEPENDENT PROTEIN KINASE
32 (PAC:15417957)
MGNCCATPPREAGDQDSHKPRGKKRFGKGNPYAKDSENGQRKLTVLEAEQRTGSSIKERYNLGRELGRGEFGVITYLQVQVQVCHKHGMHRDLKPNFLFANRKENSA
DIEDVRREVAIMRHLPPHPNIVALKGAYEDERAVHIVMELCAGGELFDRIIARGHYTERAAAGVIRTIVEVVQACHRQGMHRDLKPNFLFANRKENSA
LKAIIDFGLSVFFRPGERFNEIVGSPYYMAPEVLKRNYPGEVDVWSAGVILYILLCGVPPFWAESEQGVAQAILRGVLDVFRREPWPVAVSESAKSLVRRMLE
PDPRLRLSASQVLEHPWLHRAGKHAPNVPLDAVTRRLKQFAALNKLKKALEIIAEELSQEENAGMREIFEAMSSGRGGITLDELKIGLAKSPTIVTNE
YAEVELKSVMDAAEDNDGVLNHYGEFVTVIVYLQQRFDSDHRLKAFDRDLKDANGFLDKEDLAAALAEPEGGGDGGEVADILAEVDADKDLGLSVSYEEF
ARVMRTGTDWRKASRRYSKGRFNLSLNKLIKDGSLTATA*
>118877 Org_Smoellendorffii peptide: 118877 (1 of 3) PTHR24349:SF95 - CALCIUM-DEPENDENT PROTEIN KINASE
3 (PAC:15411727)
MRNTKSAIAGSSTPLRGSAAFKAGNVLGRPFSDLRQEFALARELGAGQFGVTRLCSSRRSTGERLACKSIAKRKLLDRSDAEDVREVVQIMHHLGHAHIV
ALREVFEDKGSVHLIMELCEGGEFDRIVQRGHYSERAAATLCRTMVLVLQVQVCHKHGMHRDLKPNFLFASADEDSPLKATDFGLSVFFKPGETFCDLV
GSAFYVAPEVLRNRYGPEADIWSAGVILYILLSGVPPFWAETEQQIFDEVLRGHLDLSSDPWPSISDGAKDLLRMLKQDPKERMTPEVLNHPWLKEDG
EAPDVPLDNAVLSRMKQFSAMNKLKALKLVIAESLSEEEIMGLKEMFKSIDTNSGTITYDELKAGLANLGSALAEHEVQQLMRAADVNGNSIDYTEF
ITATMHLNTEKEDHLYSAFQFFDKDNGSYITVEELEQALGDLNMQDLTEIIEKVDTDNDGKIDYDEFVAMMRGANPPRTAAVAAKAAEKSSS*
>152133 Org_Smoellendorffii peptide: 152133 (1 of 1) PF07714//PF13499//PF13833 - Protein tyrosine
kinase (Pkinase_Tyr) // EF-hand domain pair (EF-hand_7) // EF-hand domain pair (EF-hand_8)
(PAC:15417480)
MYVLGRELGRGQFGVTHLCTDRASGKTYACKTIKRKLISKADVEDVKREVQIMHHLGNENIVELRGSYEDKHSVHLMELCEGGEFDRIIARGHYSE
RAAAALCRTIVRVVYICHSLGVMHRDLKPNFLLADKSESAPLKATDFGLSVFFKHGDKFTDLVGSAYYVAPEVLRNRYGPEADVWSAGVILYILLSGVP
FWAESEQGIFDAVLRGQVDFVSDPWPSSISSAKDLVKKMLTQDVKKRVTAAEVLSHPVWREDGDAPDAPLDNAVLSRMKQFTAMNKLKALKLVIAASL
SEEEITGLKEMFSSMDTDGSGTITFDELKAGLERLGSNLRDAEIRQIMNAADVNGNTIDYLEFITATMQNMKQKEDHLYSAFQFFDNDNSGYALSFLK
LFMDDWLLRDSYITMEELEALVKYMGMDHETMKEILKEVTDNDGKINYDEFVAMMTKGAAPSSEQQNNRRKQELPVGAPRHRK*
>165073 Org_Smoellendorffii peptide: 165073 (1 of 2) PTHR24349:SF81 - CALCIUM-DEPENDENT PROTEIN KINASE
20 (PAC:15410490)
MGDSRPTAAAADVSPRHGGLTSSVLRGRRTENVKDLVYVLRGKLGQGGFGTYYVCTEKSSGKHYACKSIPKRKLISLEDVEDVREIHHIMHLSGHPNVVEI
KGAYEDSSCVHLMVLDLACGGEFDRIIQRGHYSESAAQLTRTIVGVVVACHSLGVMHRDLKPNFLLANADEDSPLRATDFGLSVFFQPGEVFKDVGVS
PYYVAPEVLRKQYGPVADVWSAGVILYILLSGVPPFWAETEQQIFEQVLQGDIDFESDPWPKISESAKDLIRKMLTRNPRKRLKAQEVLTWPWIMEGGVA
PDAPIDSAVLSRLKHFSAAMNKKIKIALRVAERCTEDEIAGLKEMFKMMDADNSGAIITFDELKAGLQVRVGSNLKESEIHALMDAADLDKNGTIDYTEFIT
ATLHLNKIEREENLFAAFSYFDRDSSGYITIDELQSACKEHYMGDDLLEDMLREIDQDNDGRIDYNEFVMTMRNNGGVGRGQMRNLSLRDVMVG*
>231127 Org_Smoellendorffii peptide: 231127 (1 of 1) PTHR24349//PTHR24349:SF135 - SERINE/THREONINE-
PROTEIN KINASE // SUBFAMILY NOT NAMED (PAC:15414521)
MPQQHIACHRPQRSQAQQNTKALPASPPRAASPAAPSPSPSPAKPSTAATAKNIVIPSSQPKTDGNSVNLGLPLKDVRSAYALGKELGRGQFGITYA
CTDKITGEKLACKTISKRSLRNRDMDVQREMQIMQRLAGQHANIVELKAVYEDKQSVHLMELCAGGELFDRIVSRGHYTEKAAAIVFRTIVRIVQHC
HATGVIHRDLKPNFLLASPAEDAPLKATDFGLSVFYKGTQIFTEVGSAYYVAPEVLRNRYGPEADIWSAGVILYILLCGLPPFWAETEKGIFDSVLRG
ELDFSDDPWPKISSAKELIRRMNLQNPSERLAIPILDHFPWRPDGEASDQPLDQSVLARMKGTAMNKMKKIALKIIAESLSEKEIKGLKELFKKMDV
DKSGTITFEELKSLAQGYDMAESEVRAIMESADVNGNTIDYLEFISATMNMKMDRENLLAAFKQFDTDNSGFISVEELEQALYRYGMVDEGMIKD
IIEKVDVNRKARREDRLQRVCYDAAASGIEC*
>27777.t000008 Org_Rcommunis peptide: 27777.m000274 calcium-dependent protein kinase, putative
(PAC:16799163)
MGFCLSKEKRSQQHHYNGATGLQHQSRPVAVQSKSPAQPSYQFPSQTPGAQIPRKPVVVAPSPKPVHKPDTILEKPYEDVKLHYTIGKELGRGQFGVITY
LCTEISTGKLYACKSISKRLVTRNDKEDMKREIQIMQHLSGQPNIVEFKGAYEDKQSVHLMELCAGGELFDRIIAKGHYSEKAAASICRSIVNVVHAC
HFMGMHRDLKPNFLLSSKQNALNKATDFGLSVFIEEGKTYRDIIVGSAYYVAPEVLRNRYGKEMDIWSAGVMLYILLSGVPPFWAESEKGFIDAILQG
DIDFESPPWPPTISSAKDLVRRMLTQDPKRRITSTQVLEHPWLKEGGDAASKPIIDSAVLSRMKQFRAMNKLKMAKLVIAENLSSDEIQGLKSMFANIDT
```

DNSGTITYDELKAGLARLGSKLTETEVEVKQLMDAADVDGNGTIDYLEFITATMHRHRLEREEHLYKAFQYFDKDNSGFITRDELETAMKDYEMGDDATIKE  
I ISEVDADNDRINYEFCMMKTGNQHQGKLF  
>28308.t000002 Org\_Rcommunis peptide: 28308.m000065 calcium-dependent protein kinase, putative  
(PAC:16800511)  
MGNCCRSAPAAVAREDEVKSNSYSSHDHSSKKNDAATKKQPITVLTGVAKENIEEKYLVDRRELGRGEFGVTYLCIDRDNRELLACKSISKRKLRTAVDIEDVRR  
EVAIMKHLPKNSSIVSLKEACEDDNAVHVLVMECEGGELEFDRIVARGHYTERAAAAVTRTIVEVVQLCHKHGVVHRDLKPENFLFANKKENSPLKAFDFG  
LSIFPKPGERFSEIVGSPYYMAPEVLKRNYPGEIDWSAGVILYILLCGVPPFWAESEQVAQAIALRGIIDFKRDPWPNISESAKSLVKQMLEPDKLRL  
TAKQVLEHPWLQNAKKAPNVPLGDVVKSRLKQFSMMNRFRKALRVIAEFLSTEEIEDIKDMFRKMDTNDGIVSIEELKSGLQNFNSQLAESEVQMLIE  
AVDANGKGTLDYGEFVAVSLHLQRMANDEHLKAFSYFDKDSNGYIEPDDLRLDALMEDGADDCTDMANDIFQEVDTDKDGKISYDEFVAMMKTGTDRKA  
SRHYSRGRFNLSMKMLKDGSLNLG  
>29333.t000041 Org\_Rcommunis peptide: 29333.m001078 calcium-dependent protein kinase, putative  
(PAC:16802692)  
MGNNVCGRSASQSIWWLTHPTDCFLSHHAKKEAIKGLPYNKQEQESTTSQPQNTPEQMKIAKEEIKQAALPASSAPPKQEQANQKALPSQPKEEIKQA  
PLPPKPKDETQSEVNGIIRNQRGEIKSTRQVSVKEEKKPAVPPRPRKPHNVKRLYSAGLLAESVLRKTGHLKEYYNLGRKLGHQFGTTFCLVEKGTG  
KEYACKSIAKRKLSITDDVEDVRRIEIQIMHHLSGNPNVISIKGAYEDAVAVHVVMEELCAGGELFDRIKRGHYTERKAAQLTRTIVGVVEACHSLGVMHR  
DLKPENFLFVNQEDSPLKAIIDFGLSVFFKPGEIFTDVVGSPYYVAPEVLKRYGPEADVWSAGVMVYIILSGVPPFWAETEQEIEFEEVLHGQLDFTSDP  
WPHISEAKDLVRRMLVRDPRKRITAHEVLCHPWVRDDGVAPDKPLDPAVLSRMKQFSAMNKLKMLALRVIAENLSEEEIAGLTEMFKMIDTNSGQITF  
EELKVGRLRRFGANLNESEIYDLMQAADIDNSGTIDYGEFIAATLHLNKVEREDHLFAAFSYFDKDGSGYITLDELQQACIEFGMEDVHLEEMIREVDQDN  
DGRIDYKEFVAMMQKGNSEMGKNGLQGTSTFSIGFREALQVC  
>29333.t000051 Org\_Rcommunis peptide: 29333.m001088 calcium-dependent protein kinase, putative  
(PAC:16802702)  
MGNTCVGNLSPNGFLQSVTAAVWRTRPPEDRLPSPSKEDQNSNKSIDISKSEESSKKGSHAPIQDTPPEMVKITDAPPKAMEHEKSIRPEMRNVSIVK  
AEDPKPKSNHFKRVSSAGLQMSVLRGTGNLKEIYSLGRKLGQGFQGTTFCLIEKATGRDFACKSIAKRKLTQEDVEDVRRIEIQIMHHLGHPNVIK  
IIDAYEDAVAVHVVMEELCAGGELFDRIQRGHYTERKAAELARLIVGVVQACHSLGVMHRDLKPENFLFDVHEEEAALKTIDFGLSVFFRPGETFSVVG  
SPYYVAPEVLKHYGPECDVWSAGVYIYIILSGVPPFWDETEQGI FEQVLKGELEFISEPWPNISESAKDLVRKMLVRDPRKRLTAHEVLCHPWVQVDGL  
APDRPLDSAVLSRLKQFSAMNKLKRIAIRVIAETLSEEEIAGLKEMFKMIDTDGSGQISLDELKTLGLERVGAAILKDEISDLMQAADIDNSGTIDYGEFI  
AAMLHLNKIDKEDHLFAAFSYFDKDGSGYITQDELQQACDQFGLGDIHIEDIIREVDQNDGRIDYSEFVAMMQDQSGWSEERRSK  
>29728.t000018 Org\_Rcommunis peptide: 29728.m000812 calcium-dependent protein kinase, putative  
(PAC:16806882)  
MKKQSAGSSSTTKPAHTVLPYQTSRLRDHYLIGKKGQGFQGTTYLCTNKATNAQYACKSIPKRKLLCKEDYEDVWREIQIMHHLSEHPNVVQIKGTYED  
SMFVHVLVMEELCAGGELFDRIIVAKGQYSEKEAAKLIKTIVGVVEACHSLGVMHRDLKPENFLFDTPGDDAKLKATDFGLSVFYKPGQYFSDVVGSPYYVAP  
EVLKRYGPEVDVWSAGVILYIILSGVPPFWAETESGIFRHLQKIDFESEWPWKISDSAKDLIKKMLERDPRQRISAHEVLCHPWIVDDTVAPDKPLD  
SAVLSRLKQFSAMNKLKMLALRVIAERLSEEEIGGLKELFKMLDTSSTGITFEELKEGLLRVSGELMECEIKALMEAADIDNSGTIDYGEFLAATLHLN  
KMEREENLLAAFSYFDKDGSGYITVDELQQACKDFGLDDVHLDEMIKEIDEDNDGRIDYAEFTSMRKGDEDIGRSRTMRSHLNFNLADALGVKDLN  
>29761.t000015 Org\_Rcommunis peptide: 29761.m000421 calcium-dependent protein kinase, putative  
(PAC:16808108)  
MGNCCATPPSDPHENKYYKKNPFPFSDYGLNNGVSHRLTVLKDPTGREIEQRYELGGELGRGEFGVTYLCTDKESGEKFAKCSISKKKLRRTAVDIEDVR  
REVQIMKHLPKHPNIVSLKDTYEDDNAVHVLVMECEGGELEFDRIVSRGHYTERAAAAVTKTIVEVVQMCHKHGMHRDLKPENFLFANKKESAAKAIIDF  
GLSVFFKPGERFNEIVGSPYYMAPEVLKRNYPGEVDVWSAGVILYIILCGVPPFWAETEQVAQAIIRSVVDKFRDPWPKVSDNAKDLVKKMLDPPDKRR  
LTAQVQLDHPWLQNAKKAPNVSLGETVKARLKQFSVMNKLKRALRVIAEHLSEVEEVAGIKEGFRMLDTSNKGKINLDELRIQLGLQKHQITDITDQVQMLM  
EAGDVRDGHLDYGEFVTISVHLRKMGNDEHLRKAFFEYFDKNQSGHIEIEELRNALADELDENSEEIIISAIHVDVTDKDGRIISYDEFATMMKAGTDWRK  
ASRQYSRERFNLSLKLMDKDGSLQMNENR  
>29842.t000094 Org\_Rcommunis peptide: 29842.m003597 calcium-dependent protein kinase, putative  
(PAC:16810728)  
MGCCGSKEKPSKPKNDNGYRANTGNSRPQQQQQFPQYQQWDLQQNLIIPQIQAKPKAKPSQPQSPSTPPPVKPAPAPIKPVQKPETILGKPLDDIR  
QFYTLGKELGRGQFGITYLCTENSTGHTYACKSILKRLKLSKSDREDIKKEVQIMQHLSGQPNIVEFRGAYEDRQSVHVLVMEELCAGGELFDRIIAKGHYS  
ERDAARICKDIVNVVHACHFMGVVHRDLKPENFLASKDEGATLKATDFGLSVFIEEGKTYRDKVGSAYVAPEVLSRSYKGEIDVWSAGVILYIILSGV  
PPFWAETENGIFDAILQGDIDFESKPWPSISDSAKDLIRMLTQDPKRRITSAQVLDHPWIKDGGAAADSKPIDSAVLSRMKQFRAMNKLKLLKLVIAES  
LSEEEIKGLKVMFRNMDTDSGTITYEELKTGLARLGSRLSETEVVKQLMEAADVDGNGTIDYIEFISATMHRYLRLERDEHLYKAFQHFQDKDSSGYITRDE  
LESAMKEYGMGDEATIKEIIEVDTDNDGRINYEFCAMMRSGIQQAELF  
>29852.t000019 Org\_Rcommunis peptide: 29852.m002000 calcium-dependent protein kinase, putative  
(PAC:16811562)  
MGNTCVGPTISKNQGFQSVSAAWRSRSPESGVSQANGESVHDTTSKEPESPLPVQSNPPQVVIIPKPEKPEKPNPEQPSKPKKAPQIKRVASAGLKVD  
SVLQTKTGNFKEFYSLGKKGQGFQGTTFCLVEKATGKEYACKSIAKRKLLTDEDVEDVRRIEIQIMHHLGHPNVISIKGAYEDAIAVHVVMEELCAGGEL  
FDRIQRGHYSERQAELTRTIVGVVEACHSLGVMHRDLKPENFLFVNQKEDSLKTTIDFGLSIFKPGKFNDDVVGSPYYVAPEVLRKRYGPEADVWSA  
GVIVYIILSGVPPFWAETEQGI FEHVLHGDLDFSSDPWPSISEGAKDLVRMRLDRPRLRRLTAHEVLCHPWVQEDGVAPDKPMSAVLSRMKQFSAMNKL  
KKMALRVIAESLSEEEIAGLKEMFKMIDTNSGTISFDELKAGLKRVGANLKESEIYDLMQAADVDNSGTIDYGEFIAATLHLNKIEREDHLFAAFSYFD  
KDGSGYITPDELQQACEEFGLEDFRLEEMIREVDQNDGLIDYNEFVAMMQKGNVGGGPRKALENSFSIGFREALKL  
>29896.t000003 Org\_Rcommunis peptide: 29896.m000119 calcium-dependent protein kinase, putative  
(PAC:16812395)  
MGGCISAPLKAGRIISRRLHYDNRSKPLADNSAASQPCTNFQVGNVLKSPAGNNIRQKYEFKELGRGEFGVTYRCLHKETGETYACKTISKAKLKTEID  
VEDVRRVEIMRHLPKHPNIVSYKEAYEDKEVIYLVMEELCAGGELFDRIIVAKGHYTERAAAMVTKTILEIVKVCHKHGVVHRDLKPENFLFADVHENSQ  
KAIDFGLSIFFPQGRFSEIVGSPYYMAPEVLRNRYGPEVDVWSAGVILYIILCGVPPFWAETEIEGIAHAI VGGKIDFTRDPWPRVSEAKDLVQNMLDQ  
NPYSRLTVQEVLEPWIHNASDVPNVNLRARIKQFSLMKNFKRVRVLRVADNLTDEQVDGIKQMFHMMDTNTDGTDLTFEELKSLGHKIGHVPVDPD  
VRTLMDAADIDGNGTLSIEEFVAMSIHLIKIGNDEHLSQAFKFFDKNQTYIEFEELRDAMVHDNLGNPCNEEVIKIDIMSDVDLDDKGRISFDEFKAMKSS

GMDWKMASRQYSRAMLNALSMKLLKDGSMQLKT

>30100.t000014 Org\_Rcommunis peptide: 30100.m000791 calcium-dependent protein kinase, putative (PAC:16817768)

MGNTRCRGSFKGKLYQGYSQPEDQSTASHTNRNPNSSNNSNTEHSPTSVAQAQEFKDNPKKDNFPLISPNRDKLIMRRGADNQSYVYVYLGHTANIRDLYTL  
GRKLGQGGFQGTYYLVCVENSTGTEYACKSISKRKLIKEDVEDVREIQIMHHLGAGHKNIVTIKAYEDQLYVHIVMELCSGGELFDRIIQRGHYSERKAA  
ELTKIIVGVVEACHSLGVMHRDLKPENFLVKNKDDDFSLKAIIDFGLSVFFKPGQIFTDVVGSPYVVAPEVLLKHYPGPEADVWTAGVILYIILSGVPPFWA  
ETQQGIFDAVLKGYIDFESDPWPLISDSAKDLIHKMLCGRPSDRDLTAHEVLCHPWICENGVAAPDRALDPAVLSRLKQFSAMNKKLKMALRVIAESLSEEE  
IAGLREMFQMTDNDNSGAIITFDELKAGLRRYGSTMKDTEIRDLMDAADVDNSGTIDYGEFIAATVHLNKLREHEHLVAAAFQYFDKDGSGYITVDELQQAC  
AEHNMTDVLLEDIIREVDQDNDGRIDYSEFVAMMQKGNAGIGRRTRMNSLNMSMRDAPGAQ

>30142.t000025 Org\_Rcommunis peptide: 30142.m000651 calcium-dependent protein kinase, putative (PAC:16819478)

MGNCCSRGDSGDAENKGEAVANNNGSVANNANQENSTTPPPKSTAPSPSPAASPKPAKAAPIGPVLRPMEEVKSVYITIGKELGRGQFGVTHLCTH  
KATGEQFACTIAKRKLVNKEDVEDVREIQIMHHLTGQPNIVELKAYEDKHSVHLMELCAGGELFDRIIAKGHYTERAAASLLRTIVQIVHTCHSMG  
VIHRDLKPENFLVKNKDNENSLKATDFGLSVFYKPGEVFKDIVGSAYYIAPEVLRKRYGPEADIWSVGVMLYIILSGVPPFWAEEHGIIFNAILRGHVDF  
TSDPWFQISPAKDLVRKMLNSDPKQRLTAIQVLSHPWIKEDGEAPDTPLDNAVLSRLKQFKAMNFKKVALRVIAAGCLSEEEIMGLKEMFKGIDTDNSG  
TITLEELKQGLAKQGTKLSEYEVKQLEMAAADADNGTIDYDEFITATMHLNMRDREEHLYTAFQHFQDKDNGSYITTEELEQALREYGMHDGRDIKEIIE  
VDSHDGRINRYDEFVAMMRKGNPEANPKRRDITVTV

>30147.t000328 Org\_Rcommunis peptide: 30147.m014057 calcium-dependent protein kinase, putative (PAC:16820071)

MGNCNTCVRPDTSPDTKTHRTNRQRKRSKDGKPNPYSNDTIPSPAPIRVLKDVIPLSHRTRIGDKYILGRELGRGEFGITYLCTDRETCDGLACKSISK  
RKLRTAVDIEDVREVAIMSNDLPHPNIVKLNKATYEDNENVHLMELCEGELFDRIIVARGHYSERAAANVARTIAEVVRMCHENGVMHRDLKPENFLFA  
NKKENSVLKAIDFGLSVFFKPGERFSEIVGSPYMAPEVLRKRYGPEVDVWSAGVILYIILCGVPPFWAETEQQVALAILRGQIDFKREPWQISDSAKS  
LVRQMLEADPKRRLTAQQVLDHSLWLNQAKAPNVPLGDIVRTRLRQFSLMNRFFKKALRVIAEHLVVEEVKIDMFALMDTDNDGKVTYNELRAGLRKV  
GSQLAEPKIKMLMEAADVDGNGVLDYGEFVAVTIHLQKMEDEHIRRAFMMFFDKDGSYIELEELREALADEYGETDNDVLDHDIIREVDTDKDGCISYEE  
FVMMKAGTDWRKASRQYSRERFKSLSLNLMKDGSLQLHDGLTGQCYAV

>30169.t000219 Org\_Rcommunis peptide: 30169.m006442 calcium-dependent protein kinase, putative (PAC:16821242)

MGNCTIPSSSSSEKKAAGNNKQNPFFGNDYVNSGSGYIDHKLVLKPEPTRDISAHYDLGRELGRGEFGITYLCTDVNTDEKLACKSISKKKLR  
TAVDIEDVREVEIMKHLPHHPNIVSLRATYEDDNAVHIVMELCEGELFDRIIVARGHYTERAAAAMVRTIVEVVMCHKHGMHRDLKPENFLFGNKKE  
TAPLKAIDFGLSVFFKPGERFNEIVGSPYMAPEVLRKRYGPEVDVWSAGVILYIILCGVPPFWAETEQQVAQAIRSVIDFKRDPWPKVSDNAKDLVKK  
MLNPDPKRLRLTAQQVLDHSPWLNQAKAPNVSLGETVKARLQKQFVMNKLKRALRVVAEHLVVEEVAGIKEAFDMMDTTRRGKINLEELRIGLQKIGQQI  
PDADLQILMEAADVDGDSLNLYGEFVAVSVHLKMGNDHEIHKAFAFFDQNSGYIEIEELREALNDEVDTCSEDVINAIMHDVDTDKDGRISYEEFATM  
MKAGTDWRKASRQYSRERFNSLSLKLMDRGSQVAVS

>30170.t000694 Org\_Rcommunis peptide: 30170.m014282 calcium-dependent protein kinase, putative (PAC:16822115)

MGLCFTKFHSRSHDITISSASDSPHPHYQSQPKRPPQRYHNPPPPYNNRPRPTSQAPPPTSSASNIGPIGKPYVDIASIYDLKELGRGQFGITYLCTE  
KTTGLKYACKSISRKLVDNKDVEDVREIILILQHLTGQPNIVFEKAYEDRQNLHLMELCSGGELFDRIIAKGYTEREAATITRQIVNVVHACHFMG  
VIHRDLKPENFLVSKAEDSPLKATDFGLSVFIEEGVVYKDIVGSAYYVAPEVLRNRSYKGEVDVWSAGIILYIILSGVPPFWGENEKGFIAIKGQLDL  
QSSPWPKISASAKDLIRKMLARDPKKRITAAEALEHPWLKVGGEASEKPIDSAVLRRLKQFRAMNKLKALKVIAENLSEEEIKGLKQMFNNMDTDKSG  
TITYEELKDLKRLGSRLEAEIMQLMDAADVDKSGTIDYVEFITATMHRHKLKDEEHMFQAFQYFDKDNNGSYITRDELQAMSQYGMGDATIDEILED  
VDSNKDGRINRYEEFVAMMRKGNPELVNTRRRK

>30190.t000579 Org\_Rcommunis peptide: 30190.m011343 calcium-dependent protein kinase, putative (PAC:16823697)

MGNCSNLPSTSTFTADRPPPPPHSHGITVHPPTASPPRPPPHSLQPTSNRPSAAPAAVGRVLRPMDVRSIYAFGRELGRGQFGVTYLVTHKETH  
QQFACKSIATRKLINRDDIEDVREVEIQIMHHLTGHRNIVELKAYEDRHSVNLVLMELCAGGELFDRIIAKGHYSERAAANLRCRQIVTVVHCHSMGVIHR  
DLKPENFLFSTDENSPKATDFGLSVFFKPGDITFKDLVGSAYYVAPEVLRNRYGPAIDIWSAGVILYIILSGVPPFWGETEQAIQFDTVLRGHIDFSSDP  
WPSISSAKDLVKKMLTADAKDRISAAEVLNHPMRVVDGASDKPLDIAVLRTRMKQFRAMNKLKVALKVAENLSEEEIMGLKEMFKSMDTDNNGTITY  
EELKAGLPLKGLTSESEVKQLEMAAADVDGNGTIDYIEFITATMHRNMREREDHLYKAFYFDKDKSGYITMEELEHALKEYNMGDARTIKEIIAEVDTD  
HDGRINRYEEFVAMMRKGNPELVNTRRRK

>96034 Org\_Smoellendorffii peptide: 96034 (1 of 1) PF00069//PF13499 - Protein kinase domain (Pkinase) // EF-hand domain pair (EF-hand\_7) (PAC:15404581)

MGNCLGGGDEKKQSARQALVANVLGQPHKDIKQYTIIGRELGRGQFGVTYLCTDKKSAQQFAVKTISKRKLNMKDDVDDVKREVQIMKHLTGKDNIVELY  
STFEDKSTVYVLMELCQGGELFDRIIVSKGHYTEKAASAVCRTIVKVVHTCHSHGVIHRDLKPENFLANKREDAVPKATDFGLSVFFRSQVVFREIVGSA  
YYVAPEVLLKKSYPGPEADVWSAGVILYVLLAGVPPFWAETEQQGIFEAVLRGLHDLNLSWPPTISASAKDLVRKMLKQNPRLRSLAADVLQHPWIKEDGDAP  
DKLIDGVLRSRMKNSAMNKLKVALKIISESLSEEEIILKDMFKQMDTNSGTITFEELKAGLANQGSNMIDAEIRQLMEAADVDGNGTIDYLEFIQA  
SMHLNKMMDRGDHLHAAFQNDTDGSGYITMEELEALVKHGLGVEDAKDIIKEVDTDNDGRINRYDEFAMMLKRNTPPAGAGHRRSINDLPVGIKK\*

>99178 Org\_Smoellendorffii peptide: 99178 (1 of 2) PTHR24349:SF81 - CALCIUM-DEPENDENT PROTEIN KINASE 20 (PAC:15414412)

MKAAGGIAASTPRSAITASVLRSTESVRELYTLGRKLGQGGFVYLYLCEVKSSGQYACKTIPKRKLI SQEDVDDVREIQIMHHLGQPNVQIKGAY  
EDAGSVHLMELCAGGELFDRIIQRGHYSERKAAELIRVIVGVVQACHSLGVMHRDLKPENFLVSKHEDSLMKATDFGLSVFFKPGEVFTDVVGSPYV  
APEVLRKKGPEADVWSAGVILYIILSGVPPFWAETEKGIFEQVLKGEIDFESHWPVVISQDAKDLIRKMLCPVAPNRLKAHEVLGHPWARADGVADPKP  
LDSAVLSRMKQFSAMNKKIKALRVIAESLSEEEIAGLKEMFKMMDTNSGSIITFDELKAGLERVGSNLVSEIIRDLMAAADVDNSGTIDYKEFITATLH  
LNKIEREEHLLAAAFYFDKDNNGSYITKDELQVCAENHMGEVIEEMMREADQDNDGRIDYSEFVTMMRKGAGGIGRKTMRNSLITFRDLLTV\*

>Brara.A00300 Org\_BrapaFpsc peptide: Brara.A00300.1.p (1 of 5) PTHR24349:SF83 - CALCIUM-DEPENDENT PROTEIN KINASE 6 (PAC:30636881)

MGNSCRSSKDKIHKGNNNNTKPEDSNKSSDRSTEIIPQELPKAEHNKDPALVIPLKEPIMRRNMDNQAYVVLGHKTPNIRDLYTLRKLGGQGFQGT  
YLCTELATGVVDYACKSISKRKLISKEDVDRREIQIMHHLAGHNIIVTIKAYEDSLVHIVMELCAGGELFDRIIQRGHYSERKAAELTKIIVGVVEA  
CHSLGVMHRDLKPENFLVNKDDDFSLKAIIDFGLSIFFFKPGQIFITDVVGSYVAPEVLKRYGPEADVWTAGVILYLLSGVPPFWAETQGGIFDAVLK  
GYIDFSDPWPVVISDSAKDLIRMLCCKPAERFTHAEVLRHPWICENGVAEPDRALDPAVLSRLKQFSAMNKLKMKALKVIAESLSEEEIAGLREMFQAMD  
TDNSGAIITFDELKAGLRKYGSTLKDTEIHDLMEEAADVDSNGTIDYSEFIAATIHNLKLEREEHLVAAFQYFDKDGSGYITIDELQQACVEHSMTDVFLED  
IIKEVDQNDGKIDYGEFVEMMQKGNAGVGRRTMRNSLNI SMRDA\*

>Brara.A01217 Org\_BrapaFPsc peptide: Brara.A01217.1.p (1 of 5) PTHR24349:SF89 - CALCIUM-DEPENDENT  
PROTEIN KINASE 29 (PAC:30638668)

MGCFFSSKRRRTQSDVVNGNVHRSFPTNQSQTHVPRDVTAHSSIPTNQSQTHVSRDVTEPQISTTTQNHNNHPQEQQESKPVNQOIIIEEYQVFKPLKPIA  
LLETETILGKPFQIKRILYTLGHEIGRQGFITYTCKENSTGNTYACKSILKRLKTRKQDRDDVKEIQIMQHLSGQQNIVEIRGAYEDRQSIHVMELC  
GGELFDRIIAQGHYSERAAAGVIRSVLNVQICHFMGMHRDLKPENFLSLKDESDAMLKATDFGLSVFIEEGKVYRDI VGSAYVAPEVLRSSYGEI  
DIWSAGIILYILLCGVPPFWAETEKGIFEEI IKGEIDFESQPWPSISESAKDLVRKLLTMDPRKRISAAQALEHPWIRGGEAPDNPIDSAVLSRMKQFRA  
MNKLLKALKVIAESLSEEEIKGLKTMFANMMDTQSGTITIEELKTLGLARLGSKLSAEVQLMEAADVDNGTIDYIEFISATMHRYLDRDEHLFKAF  
QYFDKDNSGFI TMDLESAMKEYGMDETSIKEVIAEVDTDNDGRINYEFCAMMRSGTTPQQGKTSSIFLTD\*

>Brara.A01377 Org\_BrapaFPsc peptide: Brara.A01377.1.p (1 of 2) PTHR24349:SF95 - CALCIUM-DEPENDENT  
PROTEIN KINASE 3 (PAC:30640163)

MGHRHSKSKTSSSSSSSDNVVHVHVKPSGERRGSSGSGPVKSSSGSGTGGSRSSQNGRILGKPMEDVKGTYDLGRELGRGQFVTHLVTHKTKKVFAC  
KSIPTRRLVQSDDIEDVRREVQIMHHLGHRNIVDLKAYEDRQSVNLI MELCEGELFDRIIAKGHYTERAAADLCRQVMVHVSCHSMGMHRDLKPE  
NFLFLSKDESSPLKATDFGLSVFFKPGDKDLVGSAYYVAPEVLKRYGPEADIWSAGVILYILLSGVPPFWGENETGIFDAILEGKLD FSADPWPVDS  
NGAKDLVKKMLTYDPKDRLTASEVLNHPWIKEDGEASDKPLDNVLSRMKQFRAMNKLKMKALKVIAENLSEEEI IGLKEMFKALD TDKNGIIVTLEELRT  
GLPKLGSKISEAEIKQLMEAADMDGDSIDYLEFISATMHMNRIEREDHLYTAFQYFDKDNSGYITMEELEQAMKKNMGDDKSIKEIIAEVDTDRDGKI  
NYEEFVAMMKKGHPVLTNRNRVNM\*

>Brara.B00448 Org\_BrapaFPsc peptide: Brara.B00448.1.p (1 of 5) PTHR24349:SF131 - CALCIUM-DEPENDENT  
PROTEIN KINASE 17-RELATED (PAC:30609053)

MGNCCSQGRDSADNADGYTKDKGITASTAEPSVPSQSKHAPSPPPATKQGPVIGVLRPMEDVKSSYSLGKELGRGQFVTHLVTHLCTQKATGQQFACKTIK  
RKLVNKEDIEDVRREVQIMHHLTGQPNIVELKAYEDKHSVHLMELCAGGELFDRIIAKGHYSERAAASLLRTIVQIIHTCHSMGVIHRDLKPENFLLL  
SKDENAPLKATDFGLSVFYKPGDVFKDIVGSAYYIAPEVLKRYGPEADIWSIGVMLYIILLCGVPPFWAESSENGIFNAILKGVHDFSSDPWPSLSPQAKD  
LVKMLNSDPKQRLTAAQVLNHPWIKEDGEAPDVPDLNAVMSRLKQFKAMNFKKVALRVIAAGCLSEEEIMGLKEMFKGMDTDSSTITILEELRQGLAKQ  
GTRLSEYEVQQLMEAADADNGTIDYGEFIAATMHINRLDREEHLYSAFQHFQFDKDNSGYITMEELEQALREFGMNDGRDIKEIIEVSDGNDGRINYEDEF  
VTMMRKNPDPKPKRRELSFK\*

>Brara.B00817 Org\_BrapaFPsc peptide: Brara.B00817.1.p (1 of 5) PTHR24349:SF131 - CALCIUM-DEPENDENT  
PROTEIN KINASE 17-RELATED (PAC:30607754)

MGNCCGRDTGNNGEPTYENGVSAAESVKASRHPASPPATKQGPVIGVLRPMEDVKSSYSLGKELGRGQFVTHLVTHLCTQKATGLQFACKTIKRRKAN  
KEDIEDVRREVQIMHHLTGQPNIVELKAYEDKHSVHLMELCAGGELFDRIIAKGHYSERAAASLLRTIVQIIHTCHSMGVIHRDLKPENFLLLNKDEN  
SPLKATDFGLSVFYKPGEEFKDIVGSAYYIAPEVLRKRYGPEADIWSIGVMLYIILLSGVPPFWAESSENGIFNAILSGQIDFSTDPWPAISHQAKDLVRKM  
LNSDPKQRLTAAQVLNHPWIKEDGEAPDVPDLNAVMSRLKQFKAMNFKKVALRVIAAGCLSEEEIMGLKEMFKGMDTDSSTITILEELRQGLAKQGTRLS  
EYEVQQLMEAADADNGTIDYGEFIAATMHINRLDREEHLYSAFQHFQFDKDNSGYITMEELEQALREFGMNDGRDIKEIIEVSDGNDGRINYEDEFVAMMR  
KGNPDPNPKKRREMSFK\*

>Brara.B00823 Org\_BrapaFPsc peptide: Brara.B00823.1.p (1 of 3) PTHR24349:SF116 - CALCIUM-DEPENDENT  
PROTEIN KINASE 7 (PAC:30610970)

MGNCCASPGSDTKSKASRPKTKSNPFYSEAYTTTNSSGTGFKLSVLKDPTGHDISLMDYDLGREVGRGEFGITLYLCTDIKTGEKYACKSISKKKLRFAVDI  
EDVREVEIMKHMPKHPNIVTLKDAFEDDDAVHIVMELCEGELFDRIIVARGHYTERAAAAMVMTILEVVQICHKNGVMHRDLKPENFLFANKKENSPLK  
AIDFGLSVFFKPGEGFNEIVGSPYMAPEVLRHYGPEVDIWSAGVILYILLCGVPPFWAETEQQGVAQAIIRSVDFKRDWPVRSVDTAKDLVRRMLEPD  
PKKRLSAAEVLHPWIQNAKAPNVSLGETVKARLKQFSVMNKLKRALRVIAEHLVSEEVAGIKEAFEMMDSKTKGKINLEELKHGLHLKQQQIPD TD  
LQILMEAADVDGDTLNYGEFVAVSVHLKMANDEHLKAFSFFDKNSNYIEIEELREALNDEVDTSSEEVIAAIMQDVDTDKDGRISYEEFAAMMKAG  
TDWRKASRQYSRERFNSLSLKLMDRGLQLEGET\*

>Brara.B02654 Org\_BrapaFPsc peptide: Brara.B02654.1.p (1 of 5) PTHR24349:SF89 - CALCIUM-DEPENDENT  
PROTEIN KINASE 29 (PAC:30608873)

MGLSSSKHRQEETAAPKSTPITPAQTHVPEHRKPQTPPTHQISAPPATVRDPDITLGPFFEDIRKFSYSLGKELGRGQFQGITRYCREISTGNTYACKS  
LKRKLISKQDKEDVREIQIMQYLSGQANIVEIKGAYEDRQSVHLMELCAGGELFDRIIAQGHYSERAAAGIIRSVNVVQICHFMGVHRDLKPENFL  
LSSKEENAMKATDFGLSVFIEEGKVYRDI VGSAYYVAPEVLRSSYGEIDIWSAGVILYILLSGVPPFWAENKGFIDEVVKGEIDFESQPWPSISESA  
KDLVRKMLTKDPRRITAAQVLEHPWIKGGEAPDKPIDSAVLSRMKQFRAMNKLKALKVIAESLSEEEIKGLKTMFANMMDTQSGTITIEELKTLGLTR  
LGSKLSETEVQQLMEAADVDNGTIDYFEFISATMHRYLDRDEHVYKAFQHFQFDKNSGHITRDELESAMKEYGMGDEASIKEVISEVDTNDGRIN FEE  
FCAMMRSGTTPQQGKLLPFH\*

>Brara.B03710 Org\_BrapaFPsc peptide: Brara.B03710.1.p (1 of 8) PTHR24349:SF166 - CALCIUM-DEPENDENT  
PROTEIN KINASE 11-RELATED (PAC:30607565)

MASERTRWVLPYRTRKLNKDDYLLGRVLGQGFQGTFFLCSHNETGQKLACKSIPKRTLLCQEDCDQVLRREIQIMHHLSEYPNVVRIQSTYEDETS VHLVM  
ELCEGELFDRIAEKGHYSERDAAKVIKTIVSVVEACHSLGVMHRDLKPENFLFSSSDEDASLSTDFGVSVFCEPDTTFSELVGSAYYVAPEVLLKHYG  
RECDVWSAGVILYVLLCGFAPFDAGTDNGIFREILQGKLFETDPWPSISESAKDLTMKMLESDPKKRLTAHQVLCHPWIVDDTVAPDKPLDFAVVSRK  
RFSAMNKLKMKALRVVAERLSEEEIIGLKLKLFKMI DRDNGTITFKELKDCIRRVGSELVESEIQELLQAADVDGSGTIDYGEFLAATIHLNKLREENL  
VAAFSSFFDKSSGCITLLEELQQAQWQFGIKDSNLKMIKIDIQDNDGQINYEFCAMMRKGNNGVGSIRRTMRNTLNFENFLPE\*

>Brara.B03711 Org\_BrapaFPsc peptide: Brara.B03711.1.p (1 of 8) PTHR24349:SF166 - CALCIUM-DEPENDENT  
PROTEIN KINASE 11-RELATED (PAC:30607630)

MVLPHSLVKQDSHTMASERTRWVLPYKTKNLQDDYLLGRVLGQGFQGTFFLCTHNETGQKLACKSIPKRLRQEHFDRVLRREIQIMHHLSENPNVRI  
QSTYEDATSVHLMELCEGELFERIAKKGHSEREAAKLTKTIVAVIEACHSLGVMHRDLKPENFLFSSCDEEDASIKSIDFGLSVFCKPGSTFSKLVGS



AYYVAPEVLRHRHYDRECDVWSAGVILYMLLCCGFPFNFAGTERGIFRKLQKGLDFETDPWPSISESAKDLIKKMLESDPKRRRLTAHQVLCHPWIVDDTVA  
PDKPLGFAVVSRLKRFSAMNKLKMLALRVVAERLSEEEIGGLKELFKMIDTNSGTITFEELKDSVRCVGSSELVESEIQELLQAAADVDESGTIDYGEFLA  
ATIHLNKLEREENLVAAFSFFDKDASGCITVDELQQAWKQFGIKDSNLDMIKDIDQSDGRIDYGEFVAMMRKGNNGSDGISRGTMRNIQLWNFLDRTE  
CFCKSSSYVFNKN\*

>Brara.B03712 Org\_BrapaFPsc peptide: Brara.B03712.1.p (1 of 8) PTHR24349:SF166 - CALCIUM-DEPENDENT  
PROTEIN KINASE 11-RELATED (PAC:30608180)

MASESRTRWVLPYKTKNLRDDYVLRGFLGQGYGTSLCTHKETGQKLACTIPKRLKLLCQEDYDVLREIQIMHHLSEYPNVVRIQETVEDDTSVHLVM  
ELCEGGELFDRIQQRGHYSERDAAVVIKTIIVSVVEACHSLGVVHRDLKPNFLFSSDDESSLKSTDFGLSVFFFKPGATFTDLVGSAYYVAPEVLRNRYG  
RECDVWSAGVILYILLCGFPFNFAGTKYGI FRKIRQKGVFEFETSPWPSISESAKDLIGKMLESNPQKRLTAHQVLCHPWIVDDTVA PDKPLDFAVVSRLK  
RFSAMNKLKKTALRVVAERLSEEEIGGLKELFKMIDTNSGTITFEELKDSVRRVGSSELVESEIKELLEAADVDESGTIDYGEFLAATIHLNKLEREENL  
VNAFSFFDKDSSGCI TMDELQQAWKQFGIKDSHLDEMIKIDHDNDGQINYGFEFVAMMRKGNNDVNGISRRTMRNTLNFNENPLPDESNELS\*

>Brara.C00182 Org\_BrapaFPsc peptide: Brara.C00182.1.p (1 of 4) PTHR24349:SF161 - CALCIUM-DEPENDENT  
PROTEIN KINASE 1-RELATED (PAC:30618202)

MGNCTCVGSPRNGFLHSVSAAMWRPRDAADSVSQTNVDTASEAVSGELRSPSSDQVLNKPPEQLTMPKPGGTNIEIKAKDNVEIQPESKLEEKETKPKET  
KEETPADAKPKPKHMKRVTSAGLRTESVLQRKTENFKEFYSLGRKLGQGFQGTTFCLVEKSTGKEFACKSIAKRKLLTDEDVEDVREIQIMHHLSGH  
QNVISIKGAYEDVMAVHLMVECCAGGELFDRIQQRGHYTERKAAELTKTIIVGVVEACHSLGVMHRDLKPNFLFVSKDESSLKTI DFGLSIFFFKPDVDF  
TDVVGSPYYVAPEVLRKQYGEADVWSAGVIVYILLSGVPPFWAESEQGFIEQVLHGDLDFSSDPWPSISESAKDLVRKMLVRDPKRLTAHQVLCHPWV  
QVDGVADPKPLDSAVLSRMKQFSAMNKFKKMALRVIAESLSEEEIAGLKEMFNMIADKSGQITFEELKAGLKRVGANLKESEIIDLQAAADVNSGTID  
YKEFIAATLHLNKLIEREDHLFAAFTYFDKDGSGYITPDELQQACEEFGVEDVRIEEMMRDQVNDNGRIDYNEFVAMMQKSGMTGGGGPVKMGGLKESFS  
NIALKL\*

>Brara.C00506 Org\_BrapaFPsc peptide: Brara.C00506.1.p (1 of 5) PTHR24349:SF131 - CALCIUM-DEPENDENT  
PROTEIN KINASE 17-RELATED (PAC:30618726)

MGNCCSGRDESDGHTQDKGLTDSNTAGPTAEPVQSKHAPPSPPPATKQGPVIGVLRPMEDVKASYSLGKELGRGQFGVTHLCTQKATGQQFACKTIA  
KRKLVNKEDIEDVREVEQIMHMMTGQPNIVELKGAIEDKHSVHLMVMECCAGGELFDRIIAKGHYSERAAASLLRTIVQI IHTCHSMGVIHRDLKPNFLL  
LSKDESSPLKATDFGLSVFYKPGVFKDIDVGSAYIAPEVLRKRYGPEADIWNSIGVMYIILCGVPPFWAESSENGIFNAIILKSHVDFSSDPWPSISPQAK  
DLVKKMLNSDPKRLTAAQVLNHPWIKEDGEAPDVLNNAWIKEDGEAPDVLNNAWIKEDGEAPDVLNNAWIKEDGEAPDVLNNAWIKEDGEAPDVLNNAWIKED  
QGTRLSYEVQQLMEAADADNGTIDYGEFIAATMHINRLDREEHLYSAFQHFDFKDNSGYITMEELEQALREFGMSDGRDIKEI ISEVDGNDGRINRYDE  
FVAMMRKGNPDQIPKRRRELSFK\*

>Brara.C01607 Org\_BrapaFPsc peptide: Brara.C01607.1.p (1 of 3) PTHR24349:SF160 - CALCIUM-DEPENDENT  
PROTEIN KINASE 24 (PAC:30616615)

MGSCVSSPLKGSPPFGKRPVRRNRNNSHKTSSSNPKFVSSNLSRLLFQPPSRVLPPEPIGDGILLKYELGKELGRGEFGVTHECIEITTRKRFAKCRISK  
EKLRTIEDVEDVREVEIMSCLPKHPNIVTFKEAFEDEDAVALVMEICEGGELFDRIIVARGHYTERAAASVTKTILEVVVKVCHHEGVIHRDLKPNFLFS  
NGTETAQLKAIDFGLSINFKHGQRFNEIVGSPYYMAPEVLRDRYGEADVWSAGVILYIILCGVPPFWAETEEGIAHAIVRGHI DFERDPWPVKVSKAQ  
LVKSMLDANPYSRLTVQEVLEHWPVQNAERAPNVNLGDNVTRNIQQFVLMNRFKKVLRLIVADNLPNEEIAAIVQMFETMTDKNGHLLTPEELRDGLKLN  
GQVCPDGDVVKMLMDAADTDGNGMLSCEEFVTL SIHLKRIGCDEHLQEAIFYDKNGNGFIELDELKEALFDDKLGQGSQWIKDIFFDVLDNKDGRISFD  
EFKAMMKSQDVKMASRQYSRALLNLSMKMFKEDFGDSAPKSQSMFPPIARKRAKILDSPKNKSMELGLSKTYKPSGLRY\*

>Brara.C01607 Org\_BrapaFPsc peptide: Brara.C01607.2.p (1 of 3) PTHR24349:SF160 - CALCIUM-DEPENDENT  
PROTEIN KINASE 24 (PAC:30616616)

MGSCVSSPLKGSPPFGKRPVRRNRNNSHKTSSSNPKFVSSNLSRLLFQPPSRVLPPEPIGDGILLKYELGKELGRGEFGVTHECIEITTRKRFAKCRISK  
EKLRTIEDVEDVREVEIMSCLPKHPNIVTFKEAFEDEDAVALVMEICEGGELFDRIIVARGHYTERAAASVTKTILEVVVKVCHHEGVIHRDLKPNFLFS  
NGTETAQLKAIDFGLSINFKHGQRFNEIVGSPYYMAPEVLRDRYGEADVWSAGVILYIILCGVPPFWAETEEGIAHAIVRGHI DFERDPWPVKVSKAQ  
LVKSMLDANPYSRLTVQEVLEHWPVQNAERAPNVNLGDNVTRNIQQFVLMNRFKKVLRLIVADNLPNEEIAAIVQMFETMTDKNGHLLTPEELRDGLKLN  
GQVCPDGDVVKMLMDAADTDGNGMLSCEEFVTL SIHLKRIGCDEHLQEAIFYDKNGNGFIELDELKEALFDDKLGQGSQWIKDIFFDVLDNKDGRISFD  
EFKAMMKSQDVKMASRQYSRALLNLSMKMFKEDFGDSAPKSQSMFPPIARKRAKILDSPKNKSMELGLSKTYKPSGLRY\*

>Brara.C01984 Org\_BrapaFPsc peptide: Brara.C01984.1.p (1 of 1) PTHR24349:SF81 - CALCIUM-DEPENDENT  
PROTEIN KINASE 20 (PAC:30618339)

MGNCTGPKLNPNGFLQSVSAVWRNQPDPESLESNKDDSSKKS SVHGGDNAPSVDPTPSTPPPPVKMANEEAPKCINNDENPKPKKEAHMKRMASAGL  
QIDSVLGRKTENLKEIYSVGRKLGQGFQGTTFCLVDKKTNKLACTIAKRKLLTPEDIEDVREIQIMHHLGHPNVIQIVGAYEDAVGVHVVMEICAG  
GELFDRIIQQRGHYTERKAAELARTIVGVIEACHSLGVMHRDLKPNFLFVSGDEEAALKTI DFGLSVFFFKPGETFSDVVGSPYYVAPEVLRKHYSHCEDV  
WSAGVILYIILSGVPPFWDETEQGFIEQVLKGDLDLDFVSEPWPSVSESAKDLVRRMLIRDPKRRMTAHEVLCHPWAVRDGVALDKPLDSAVLSRLKQFSAM  
NKLKIAIKVIAESLSEEEIAGLKEMFKMIDTNSGHITLLEELKGLDRVGANLKDSEIILGLMQAADIDNSGTIDYGEFIAAMVHLNKI QKEDHLFTAFS  
YFDKDGSGYITREELQGGCKQFGLADVHLLDII SEVDKNDGRIDYSEFVEMMQDTGFGKMGRLVS\*

>Brara.C02607 Org\_BrapaFPsc peptide: Brara.C02607.1.p (1 of 8) PTHR24349:SF166 - CALCIUM-DEPENDENT  
PROTEIN KINASE 11-RELATED (PAC:30617300)

MEKPSRRPSSSVLPYETPRLRDHYLLGKKGQGFQGTTYLCTEKSSSANYACKSIPKRLVCREDEDVWREIQIMHHLSEHPNVVRIKGTYESVVFVH  
IVMEVCEGGELFDRIIVSKGHFSEREAALIKTILGVVEACHSLGVMHRDLKPNFLFSDPNDDAKLKATDFGLSVFYKPGQYLDVVGSPYYVAPEVLRK  
CYGPEIDVWSAGVILYIILSGVPPFWAETESGIFRQILQKGLDFKSDPWPITISEGAKDLIYKMLDRSPKRRISAHEALCHPWIVDEQAAAPDKPLDPAVLS  
RLKQFSQMNKIKKMLRVIAERLSEEEIGGLKELFKMIDTNSGTITFEELKAGLKRVGSELMESEIKSLMDAADIDNSGTIDYGEFLAATLHMNMKERE  
ENLVVAFSYFDKDGSGYITIDELQACTEFGLCDTFLDDMIKEIDLNDGRIDFSEFTAMMKKGDGVGRSRTMMKNLNFNIADAFGVEETSSAETDDKPN  
\*

>Brara.C03333 Org\_BrapaFPsc peptide: Brara.C03333.1.p (1 of 4) PTHR24349:SF161 - CALCIUM-DEPENDENT  
PROTEIN KINASE 1-RELATED (PAC:30617367)

MGNVCVGTISGNSFVQAVSAAIWRPRIGAEQQASSHGKGEASKEAASSHGKGEASKEAASSHGKAEVSKEASSSEPLDQVQNKPPPEQVTMSNPRTIPE  
AETKSKPEEVKQEVVVQVETTKPETKSETKPKDPNPKHMRVSSAGLRTESVLRQKTENFKEFYSLGRKLGQGFQGTTFCLVEKGTGKEYACKSIS  
KRKLLTDEDVEDVREIQIMHHLGHPNVI SIKAYEDVVAHVHLMVMECCAGGELFDRIIQQRGHYTERKAAELARTIVGVLETCHSLGVMHRDLKPNFLF

VSKEEDSLLKTI D FGLSMFFK PDEIF T D VV G S P Y Y V A P E V L R K R Y G S E S D V W S A G V I V Y I L L S G V P P F W A E T E Q G I F E Q V L H G D L D F S S D P W P S I S E G A K  
D L V Q K M L V R D P K R R L T A H Q V L C H P W V Q I D G V A P D K P L D S A V L S R M K Q F S A M N K F K K M A L R V I A E S L S E E E I A G L K E M F K M I D A D N S G Q I T F E E L K V G L K R  
V G A N L K S E I L D L M Q A E I L D L M Q A H Q V L C H P W V Q I D G V A P D K P L D S A V L S R M K Q F S A M N K F K K M A L R V I A E S L S E E E I A G L K E M F K M I D A D N S G Q I T F E E L K V G L K R  
V A M M Q K G S I M G G G P M K M G L E K S I S I S L K H \*

>Brara.C03790 Org\_BrapaFPsc peptide: Brara.C03790.1.p (1 of 5) PTHR24349:SF89 - CALCIUM-DEPENDENT  
PROTEIN KINASE 29 (PAC:30617675)

MGNCFAKNHGLMKPQQNGQTSRSEVDQTHQDPPSYTPQPRSQTPEKPSSETNQPPWRMAAPAPSPKAAKSSSTSILENAYEDVKLFYTLGKELGRGQFG  
VTYLCTENSTGKKYACKSISKKKLVTKADKDDMRREIQIMQHLSGQPNIVEFKGAYEDEKAVNLVMELCAGGELFDRIIAKGHYSERAAASVCRQIVNVV  
KICHFMGVLRDLKPENFLSSKDDKALIKATDFGLSVFIEEGKVYRDI VGSAYVAPEVLRRLRYGKEVDIWSAGI ILYILLSGVPPFWAETEKGIFDAI  
LEGHIDFESQFPWPSISNSAKDLVRKMLTADPKRRI SAADVLGHPWLREGGEASDKPIDS AVLSR MKQFRAMNKLK LALKVIAENINTEEQGLKAMFAN  
IDTDSNGTITYEELKEGLAKLGSKLTEAEVKQLMDAADVDGNSIDYIEFITATMHRHRESLENLYKAFQHFDKDGSGYITIDELEVALKEYGMGDDAT  
IKEVLSDVSDNDGRINYEFCAMMRSGNPQQQQQQPPRFL\*

>Brara.C04385 Org\_BrapaFPsc peptide: Brara.C04385.1.p (1 of 3) PTHR24349//PTHR24349:SF145 -  
SERINE/THREONINE-PROTEIN KINASE // SUBFAMILY NOT NAMED (PAC:30616576)

MGNCCRSPASVAREDVKSNSYSGNDHRRKDAAGGKFPAPIRVLGDPVKENIEDRYLLDRELGRGEFGVTYLCIVRSTRDLLACKSISKRKLRTDVEDVK  
REVAIMQHLPSESSIVTLKEACEDDNAVHLMVMELCGGELFDRI VARGHYTERAAAGVTKTIVEVVQLCHKHGVIHRDLKPENFLFANKKENSPLKAIDF  
GLSIFFKPGEKFFSTIVGSPYYMAPEVLKRSYGPEIDIWSAGVILYILLCGVPPFWAEESEQVAQAILRGIIDFKREPWPNISETAKSLVRQMLEPDPKRR  
LTAKQVLEHPWIQNAKKAPNVPLGDVVKSRLKQFVSMNRFRKALRVIAEFLSTQEVEDIKEMFNKMDTDKDGIVTIEELKAGLRDFGTQLAEESEVQMLI  
EAVDTKGKGTLDYGEFVAVSLHLQKVANDEHLRKAFSYFDKDGNGYILPQELCEALKEDGGDDCVDVANDIFQEVDTDKDGRISYEEFAAMMKTGTDRK  
VSRHYSRGRFNLSIKLMKDGSLNLGNE\*

>Brara.D00630 Org\_BrapaFPsc peptide: Brara.D00630.1.p (1 of 3) PTHR24349//PTHR24349:SF145 -  
SERINE/THREONINE-PROTEIN KINASE // SUBFAMILY NOT NAMED (PAC:30621870)

MGNCCRSPAAVAREDVKSNSYSGRDHHRKDAAGGKLPAPIRVLSEVPKENIEERYLLDRELGRGEFGVTYLCIERSTRDLLACKSISKRKLRTAVDIEDVK  
REVAIMKHLPKSSSIVTLKEACEDDNAVHLMVMELCGGELFDRI VARGHYTERAAAGVTKTIVEVVQLCHKHGVIHRDLKPENFLFANKKENSPLKAIDF  
GLSIFFKPGEKFFSEIVGSPYYMAPEVLKRSYGPEIDIWSAGVILYILLCGVPPFWAEESEQVAQAILRGIIDFKREPWPNISETAKNLVRQMLEPDPKRR  
LTAKQVLEHPWIQNAKKAPNVPLGDVVKSRLKQFVSMNRFRKALRVIAEFLSTQEVEDIKEMFNKMDTDKDGIVTIEELKAGLRDFGTQLAEESEVQMLI  
EAVDTKGKGTLDYGEFVAVSLHLQKVANDEHLRKAFSYFDKDGNGYILPQELCEALKEDGGDDCVDVANDIFQEVDTDKDGRISYEEFAAMMKTGTDRK  
ASRHSRGRFNLSIKLMKDGSLNLGNE\*

>Brara.D00630 Org\_BrapaFPsc peptide: Brara.D00630.2.p (1 of 3) PTHR24349//PTHR24349:SF145 -  
SERINE/THREONINE-PROTEIN KINASE // SUBFAMILY NOT NAMED (PAC:30621871)

MGNCCRSPAAVAREDVKSNSYSGRDHHRKDAAGGKLPAPIRVLSEVPKENIEERYLLDRELGRGEFGVTYLCIERSTRDLLACKSISKRKLRTAVDIEDVK  
REVAIMKHLPKSSSIVTLKEACEDDNAVHLMVMELCGGELFDRI VARGHYTERAAAGVTKTIVEVVQLCHKHGVIHRDLKPENFLFANKKENSPLKAIDF  
GLSIFFKPGEKFFSEIVGSPYYMAPEVLKRSYGPEIDIWSAGVILYILLCGVPPFWAEESEQVAQAILRGIIDFKREPWPNISETAKNLVRQMLEPDPKRR  
LTAKQVLEHPWIQNAKKAPNVPLGDVVKSRLKQFVSMNRFRKALRVIAEFLSTQEVEDIKEMFNKMDTDKDGIVTIEELKAGLRDFGTQLAEESEVQMLI  
EAVDTKGKGTLDYGEFVAVSLHLQKVANDEHLRKAFSYFDKDGNGYILPQELCEALKEDGGDDCVDVANDIFQEVDTDKDGRISYEEFAAMMKTGTDRK  
ASRHSRGRFNLSIKLMKDGSLNLGNE\*

>Brara.D01902 Org\_BrapaFPsc peptide: Brara.D01902.1.p (1 of 1) PF00036//PF00069//PF13499 - EF hand (EF-  
hand\_1) // Protein kinase domain (Kinase) // EF-hand domain pair (EF-hand\_7) (PAC:30622182)

MGSCVSSPLKGSPPFRKRPRRRKSSKSKTSTNPRVDSSTNLSRRLIFQPPSRVLPPIGDGIFVKYELGKELGRGEFGVTHECIEITTRERFACKRISKE  
ELRTEIDVEDVRVEIMRSLPKHPNIVSFKEAFEDKEAVYLVMEICEGGEFLDRIVSRGHYTERAAASVAKTILEVVKVCHEHGVIHRDLKPENFLFSN  
ETETAQLKAI D FGLSIFFKPQFLRQNEIYFVGLSPPYMAPEVLKRSYGPEIDIWSAGVILYILLCGVPPFWAETE E E G I A H A I V R G N I D F R D P W P K V S A E A K E L  
VKDMLDANPYSRLTVQEVLEHPWIQNAERAPNVNLGDNVTKIQQFLLMNRFRKALRVIAEFLSTQEVEDIKEMFNKMDTDKDGIVTIEELKAGLRDFGTQLAEESEVQMLI  
TVCPDGDV KMLMDAADTDGNGM LSC E E F V T L A I H L K R M G C D E H L Q Q A F Y F D K N G N S I E L D E L K E A L F D D K L G Q G N D Q W I K D I F F D V D L N K D G R I S F D  
E F K A M M K S G T D W K M A S R Q Y S R A L L N A L S I K M F K E D G N N G P K F H S M E F P V A R K K A N I L D P K N K S M E L V H S R T Y K P S G L R N \*

>Brara.D02174 Org\_BrapaFPsc peptide: Brara.D02174.1.p (1 of 2) PTHR24349:SF128 - CALCIUM-DEPENDENT  
PROTEIN KINASE 25 (PAC:30621670)

MGNVCIHMVNNCVDTKSNVTWRPTDLIMDHPVKQLPDKPPQMLMHKDDDKPKLETSGEDPKLLEESDSHQEQQEGSTSEERKKRAARIACGNSKRKPH  
NVKRLMSAGLQAESVLKTKTGHLEKEYNLGSKLGHGQFGTTFVCTEKGTGEEYACKSIPKRKLENEEDVEDVREIEIMKHLGQPNVISIKGAYEDAVA  
VHMVMELCRGGELFDRI VERGHYSERKAAHLAKVILGVVQTFCHSLGVMHRDLKPENFLFVDDQEDSPLKAIDFGLSMFVKPGENFSDVVGSPYYIAPEIL  
NKDYGPEADIWSAGVMYVLLSGSAPFWGETE E E I F N E V L E G E L D L S S D P W P Q V S E S A K D L I R K M L E R D P K R L T A Q Q V L G H P W I R D E G N A P D T P L D A T V  
LNRLKFFSETDKLKKIALQVTVERLSEEKIRSLRETFKIIDSEKSGKVTYKELKSI LERFDTNLNSDISGLMQMPNEHLEDTVDYEEFIAIVRLKEL  
QDEEANDRLDSSTKV\*

>Brara.D02546 Org\_BrapaFPsc peptide: Brara.D02546.1.p (1 of 2) PTHR24349:SF93 - CALCIUM-DEPENDENT  
PROTEIN KINASE 14 (PAC:30623178)

MGNCCGTGGLTIGNDKNKGFKIANPFSIDYGRHDGDKLVVLKEPTGRDIKRLYNLRELGRGEFGVTYLC T D N E T G E S F A C K S I L K K K L R T A V D I D D V  
R R A E I M R M P E H P N I V T L K E T Y E D D K A V H L V M E L C G G E L F D R I V A R G H Y T E R A A S V I K T I M E V V Q M C H K H G V M H R D L K P E N F L F A N K K E T A P L K A I D  
F G L S I F F K P G E K F F S T I V G S P Y Y M A P E V L K Q S Y G P E I D I W S A G V I L Y I L L C G V P P F W A E T D H G V A K A I L K S V I D F R R D P L P K V S S N A K D L I K R M L H P D P K L  
R L T A Q Q V L D H P W I Q D G K N A S N V L S G E S V R A R L K Q F T V M N K L K K A L R V I A E H L S V E E A S G I I E R F Q V M D T S N R G K I T I Q E L R L G L R K L G I V V P Q D D I Q I L  
M D A G D V D K D G Y I D I N E F V A I S V H I R K M G N D E H L K A F K F F D L D K S G Y I E I D E L R D A L A D E F D T T S E V V E A I I Y D V D T N K D G R I S Y E E F A T M M K T G T D W R  
K A S R Q Y S R D R E K N L S R K L M Q D G S L Q S H G D T K \*

>Brara.E00252 Org\_BrapaFPsc peptide: Brara.E00252.1.p (1 of 2) PTHR24349:SF93 - CALCIUM-DEPENDENT  
PROTEIN KINASE 14 (PAC:30626664)

MGNCCGTAGSLIVNEKLLKLANPFSIDYGRHDGDKLVVLKEPTGREIKRLYKLGRELGRGEFGVTYLC T D N E T G D V F A C K S I L K K K L R T A V D I D D V  
R R A E I M R M P E H P N I V T L K E T Y E D D K A V H L V M E L C E G G E L F D R I V A R G H Y T E R A A S V V K T I M E V V Q M C H K H G V M H R D L K P E N F L F A N K K E T A S L K A I D  
F G L S I F F K P G E K F F S T I V G S P Y Y M A P E V L K Q S Y G P E I D I W S A G V I L Y I L L C G V P P F W A E T D H G V A K A I L R S V I D F R R D P W P K V S A N A K D L I K M L H P D P K R  
M D A G D V D K D G Y I D I N E F V A I S V H I R K M G N D E H L K A F K F F D L D K S G Y I E I D E L R D A L A D E F D T T S E V V E A I I Y D V D T N K D G R I S Y E E F A T M M K T G T D W R

RLTAQQVLEHPWLQDGKNAPNVSLETGTVRARLQKQFVMMNKLKRALRVIAEHLSEVEASGKERFQVMDTSNRGKITIEELRIGLRKLGIVVPQDDIQIL  
MDAGVDVKDGDYLDVNEFVAISVHIRKMGSDHEHLKTAFAFFDQNKSGYIEIEELREALANEFDTTSEVVEAIIILDVDTNKDGRISYEEFATMMKTGTDRW  
KASKQFSRDRFKNLSIKLKEEGLSNNSNDCAE\*

>Brara.E01210 Org\_BrapaFPsc peptide: Brara.E01210.1.p (1 of 1) PF00036//PF07714//PF13499 - EF hand (EF-hand\_1) // Protein tyrosine kinase (Pkinase\_Tyr) // EF-hand domain pair (EF-hand\_7) (PAC:30625067)  
MGSCVSSPLKGSPPFKRPARRRNNSSTKTSNPKTDTSTSTLSRRLIFQPPSRVLPPEIGDGFILFKYELGKELGRGEFGVTHECIEISTRERFACKRI  
SKEKLRTEIDVEDVREVEIMRSLPKHANIVSFKEAFEDKAVYLVMEICEGGELFDRIVSRGHYTERAAASVAKTILEVVKVCEHGVHRDLKPENFL  
FSNETETAQLKAIDFGLSIFFKPAQRFNIEIVGSPYMAPEVLRNRYGPEIDVWSAGVILYILLCGVPPFWAETEEGIAHAIVRGNIDFERDPWPVKSREA  
KELVKNMLDANPYSRLTVQVEVLEHPWIQNAERAPNVNLGDGVRTKIQQFLLMNRFKKVKLRVVDNLPNEEIESIIQMFQTMDDTKNGHLTFEELRDGLK  
KIGQVCPDGDVVKMLMDAADTDGNTLSCEEFVTLAIHLKRMGCDEHLQQAFKYFDKNGNSIELDELKEALFDDDKLGHGGDQWIKDIFFDVLDNKDGRIS  
SFDEFRAMMKSQTDWKMASRQYSRALLNALSIFKMFKEDVGDNGPKSYSMEFPLARKKALLDAPKNKSMELVHVKTYRPSGLRN\*

>Brara.E01219 Org\_BrapaFPsc peptide: Brara.E01219.1.p (1 of 1) PF07714//PF13833 - Protein tyrosine kinase (Pkinase\_Tyr) // EF-hand domain pair (EF-hand\_8) (PAC:30625239)  
MGCFWSKNQPPSDGELQNILGKPLGDIKNYYSFGKELGKGNLGTTYMCEEILTGRSYACKSIPKGLKSKQEDKEAVKKEIEIMFRLSCQHNIVSISVSYE  
DRECIHVVMELCGGELSSRIEASHYSSEKDSAGILKSIYNALQTCMSMVIHRDVKPNFLFSSEVENTVLKAIIGFGSSVYIKQETELKRKVESKYLLA  
PEVLQKSYGKEIDIWSAGVILYLLCGKHPFETESKIRRGSLDLESKPWPCVSESADKLVKMLTKDPKSRISASDVLEHSWIKMQAPYKPIDNVLVLC  
MKRFGAMNKLKALNADVDGNGRIDLCEYISATTEITNVLVTDENLHKAQFFQFDKDGSGYITKDNLMKHVVGNANAKDIISEVDTDNDGRIDYEEFCAM  
MRDGKLPQGGKRRVRIN\*

>Brara.E01819 Org\_BrapaFPsc peptide: Brara.E01819.1.p (1 of 8) PTHR24349:SF166 - CALCIUM-DEPENDENT PROTEIN KINASE 11-RELATED (PAC:30623678)  
MEKANPRRNSNTVLPYQTPRLRDHYLLGKKGQGGFQGTYYLCTEKSTSTANYACKSIPKRLKVCREDYEDVWREIQIMHHLSEHPNVVRIKGTYESVVFVH  
LVMEVCEGGELFDRIIVAKGHFSEREAVKLIKILAVVEACHSLGVMHRDLKPENFLFDSPKEDAKLKATDFGLSVFYKPGQYLYDVVGSPPYVAPEVLK  
CYGPEIDVWSAGVILYILLSGVPPFWAETESGIFQILQKGLDFKSDPWPITSEAAKDLIYKMLERSPKKRISAHEALCHPWIVDEEAAAPDKPLDPAVLS  
RLKQFSQMNKIKKMLRVIAERLSEEEIGGLKELFKMIDTNSGTTIFEELKAGLKRVSSELMSEIEKSLMDAADIDNSGTYDGEFLAATLHMNMKERE  
ENLVAAFSYFDKDGSGYITIDELQSACTEFLGCDTFLDDMIKEIDLNDGKIDFSEFTAMMKKGDGVRRTMMKNLNFNIADAFGVDEQSAQKSD\*

>Brara.E02997 Org\_BrapaFPsc peptide: Brara.E02997.1.p (1 of 4) PTHR24349:SF161 - CALCIUM-DEPENDENT PROTEIN KINASE 1-RELATED (PAC:30626505)  
MGNVVCVGNLNGSNGFLQTVSAAALWKPRIGAEQASSSHGNAQQVPKEAAAEVSKEAVPDQVQNKPPQVQVMPNPSSIPEAETKPKPEPEEAKQEVVVQVET  
STKTETKPEPKPEPTKPKETPNPETKPDPNPKPHMRRVSSAGLRTESVLQRKTENFKEFYSLGRKLGQGGFQGTFFLCLEKGTGNEYACKSISKRKLLT  
DEDVEDVREIQQIMHHLGHPNVIISIKGAYEDVVAVHLMELCSGGELFDRIIQRGHYTERKAAELARTIVGVLETCBSLGMHRDLKPENFLFVSREED  
SLLKTIIDFGLSMFFKPEVFTDVGSPYVAPEVLRKRYGPESDVWSAGVIVYILLSGVPPFWAETEQGIFEQVLHGDLDFSSDPWPSISDGAKDLVQKM  
LVRDPKRLTAHQVLCVHPVQIDGVAPDKPLDSAVLSRMKQFSAMNKFKKMLRVIAESLSEEEIAGLKEMFKMIDADNSGQITFEELKAGLKRVGANLK  
ESEILDLMQAADVDNSGTYDGEFLAATLHLNKEIEKEDHLFAAFSYFDKDGSGFITPDELQHACEEFGVEDARIEEMMRDQDKDGRIDYNEFVAMMQ  
GSIMGGPMKMGLEKISISLKH\*

>Brara.F01336 Org\_BrapaFPsc peptide: Brara.F01336.1.p (1 of 3) PTHR24349:SF167 - CALCIUM-DEPENDENT PROTEIN KINASE 10-RELATED (PAC:30630361)  
MGNVNCVCKPNSSEDSTQPKPTPNDRKPNPYAAGAIIVRSFGTTLKDAVIPTSHRTKISDKYILGRELGRGEFGITHLCTDRETREALACKSISKRKLLT  
AVDVEDVREVAIMSTLPDPHNVKLRATYEDGENVHLVMELEGGELFDRIIVARGHYTERAAAGVARTAEVVMCHSNGVVHRDLKPENFLFANKKEN  
SALKAIDFGLSVFFKPGDKFTEIVGSPYMAPEVLRKRYGPEVDVWSAGVIVYILLCGVPPFWAETEQGVALAILRGLVDFKRDWPVQVSESASLVRQM  
LDPPAKRLTAQQVLAHPWIQHAQKAPNVPLGDIIVRSRLKQFSMMNRFKKVKLRVIAEHLVQVEVEVVKDMFSLMDEEDNDRITYPELQAGLQKVGSQLG  
EPEIKMLMEVADVVDGNGFLDYGEFVAVIIHLQKIEDELKLAFFMFDKDGSGYITDELQHACEEFGVEDARIEEMMRDQDKDGRIDYNEFVAMMQ  
KAGTDWRKASRQYSRERFKSLSLNLMKDGSLHLHDALTGQSVVP\*

>Brara.F02560 Org\_BrapaFPsc peptide: Brara.F02560.1.p (1 of 5) PTHR24349:SF83 - CALCIUM-DEPENDENT PROTEIN KINASE 6 (PAC:30631163)  
MGNCRGSKFDKVEYEGNNSRPEENRSTTTNDHSPTEAQDFPKEDSNPNVVPVKEPFIRRNMDNQAYVVLGHKTPNIRDLYTLRSLKLGQGGFQGTYYLCTEV  
ATGVYDACKSISKRKLLISKEDVEDVREIQQIMHHLGHNIVTIRGAYEDPLYVHIVMEVCAGGELFDRIIQRGHYSERKAAELTKIVGVVEACHSLGV  
MHRDLKPENFLLVNKDDDFSLKAIDFGLSVFFKPGQIFKDVVGSPPYVAPEVLLKHYGPEADVWTAGVILYILLSGVPPFWAETEQGIFDAVLKGDVDFE  
SDPWPVSDSAKDLISKMLCSRPSERLTAHEVLRHPWICENGAVAPDRALDPAVLSRLKQFSAMNKLKMKALKVIAESLSEEEIAGLRAMFEAMDTNSGA  
ITFDELKAGLRRYGTLDKTEIRDLMEAADVDNSGTYDGEFIAATIHLNKLDRHEHLVSAFYFDKDGSGYITIDELQQSCVEHGMTDVFLVDVIKEVD  
QDNDGRIDYGEFVAMMQKGNAGVGRRTMKNLSNISMARDV\*

>Brara.F02597 Org\_BrapaFPsc peptide: Brara.F02597.1.p (1 of 8) PTHR24349:SF166 - CALCIUM-DEPENDENT PROTEIN KINASE 11-RELATED (PAC:30631379)  
MHHLSEYPNVVRIQDITYEDNSVHLVMELEGGELFDRIIVKKGHYSEREAALMKTIVGVVETCHSLGLVLRDLKPENFLFASCDDEDASLKSTDFGLSVF  
CKPGATFSELVGSAYVAPEVLRHSHYSRECDVWSAGVILYILLCGFPPFWAEESEIGIFRKLQKLNFTNPWPSISESAKDLIKKMLEGNPKRRLTAHQ  
VLCHPWIVDDTVAPDKPLDCAVVSRLKFSAMNKLKMLRVIAERLSEEEIGGLKEMFKMIDTDSGTTIFEELKDSMKRVGSELMESEIQELHAADV  
DESGTIDYGEFLAATLHLNKLREENLVAAFSFFDKDASGYITIDELQQAWEKFGINDSHLDEMIKIDIDQDNDGQIDYGEFVAMMRKGNNGGIGRRTRM  
NTLSFENLPEDESIN\*

>Brara.F03923 Org\_BrapaFPsc peptide: Brara.F03923.1.p (1 of 5) PTHR24349:SF83 - CALCIUM-DEPENDENT PROTEIN KINASE 6 (PAC:30629157)  
MKHSGGNQACFVLGQKTPSIRDLYSLGHKLGQGGFQGTYYMCREISTGREYACKSITKRKLLISKEDVEDVREIQQIMHHLGAYKNIVTIRGAYEDPLYVHI  
VMELESGGELFDRIIQRGHYSERKAAELIKIVGVVEACHSLGVMHRDLKPENFLLVNKDDDFSLKAIDFGLSVFFKPGQIFEDVVGSPYVAPEVLLKH  
YGPEADVWTAGVILYILVSGVPPFWAETEQGIFDAVLKGHIDFSDPWPVLSDSADKDLIRGMLCSRPSERLTAHQVLRHPWICENGAVAPDRALDPAVLSR  
LKQFSAMNKLKQALRVIAESLSEEEIAGLKEMFKAMDTNSGAIITFDELKAGLRRYGTLDKTEIRDLMEAADIDKSGTIDYGEFIAATIHLNKLDR  
HLLSAFSYFDKDGSGYITIDELQQACAEQMSDVFLEDVKEVDQDNDGRIDYGEFVAMMQKGIAGRTMRQSNMNSLRKNA\*

>Brara.G01743 Org\_BrapaFPsc peptide: Brara.G01743.1.p (1 of 2) PTHR24349:SF126 - CALCIUM-DEPENDENT

PROTEIN KINASE 32 (PAC:30633874)

MGNCCGTAGSPQNDSDSNPKKGGKQNPFSIDYGLHHNGGGGGLKLTVLSDPDTGREIEQKYTLGRELGRGEFGVYLYLCTDKETGGVLACKSILKKLKL  
TAVDIEDVRRREAEIMRHMPHPNLVTLKETYEDYAVHLMELCEGGELFDRIVARGHYTERAAAAVTKTIEVVQVCHKHGMHRDLKPNFLFANKKE  
TAPLKAIDFGLSVFVKPGERFNEIVGSPYYMAPEVLKRNYPGEVDIWSAGVILYILLCGVPPFWAETEQQGVAQAIIIRSQLDFRRDPWPKVSEHAKDLIRK  
MLDPPDQKRRLTAQQVLDHPWLQANANTAPNVSLGETVVARLQKQFTVMNKLKRALRVIAEHLSDDEASGIREGFQIMDTSQRGKINIDELKIGLQKLGHNI  
PQDDIQLMDAGDITDKDGYLDCDEFIAISVHLRKMGNDEHLKKAFAFFDQDNNGYIEIEELREALSDEVGTSEEVDVAIIRDVDTDKDGRISYEEFVTMM  
KTGTDWRKASRQYSRERFNTSISLKLMDASLHANGDTR\*

>Brara.G03159 Org\_BrapaFPsc peptide: Brara.G03159.1.p (1 of 3) PTHR24349:SF167 - CALCIUM-DEPENDENT  
PROTEIN KINASE 10-RELATED (PAC:30635005)

MGNICACVNFDPDPEADSKQTKNRKRVKPNAYHDPDGLRSHGPIRVLPDVPMSHRTQISDKYILGRELGRGEFGITYLCTDRETREALACKSISKRKL  
RTAVDVEDVRRREVTIMSTIPDHPNVVVKLKYEDNENHVLVMECEGGELFDRIVARGHYTERAAATVARTIAEVVKMCHMNGVMHRDLKPNFLFANKK  
ENSALKAIIDFGLSVLFPKGERFTEIVGSPYYMAPEVLKRDYGPVEVDVWSAGVILYILLCGVPPFWAETEQQVALAILRGVLDKFRDPWSQISSEAKSLVK  
QMLNPDPTKRLTAQQVLDHPWIQNAKAPNVPLGDIVRSRLKQFSSMNRLLKRALRVIAEHLSDIQQEVEVIRDMFTLMDDDNDGKITYPELRAGLKKVGSQ  
LGEPEIKMLMEVADVNGGCLDYGEFVAVIHLQKMEDEHFRQAFMFDDKDGSGYIESDELRRALTDELGEPDNSVVIDIMREVDTDKGRINIDYDEFV  
MMKAGTDWRKASRQYSRERFKSLNLMKDGSLHLHDALTGQSVAV\*

>Brara.G03397 Org\_BrapaFPsc peptide: Brara.G03397.1.p (1 of 5) PTHR24349:SF89 - CALCIUM-DEPENDENT  
PROTEIN KINASE 29 (PAC:30635009)

MFRKLNKATRNKRNRTRTKHFFNRMGFCFSKQTEIPISSSSDSTPHRYQLPKPTNPQTQTSTFTPTPKPKPAPPPSSSSQIGPILNRPMDLSA  
LYDLHKELGRQFGITYRCDKSNGREYACKSISKRKLIRQKDIEDVRRVEMILQHLTQGNIVEFRGAYEDKDNLHVMECEGGELFDRIIKKGSYSE  
KEAANIFRQIVNVVHVCHFMGVVHRDLKPNFLLVSADDDSPIKATDFGLSVFIEEGVKYKDVVGSAYYVAPEVLHRNYGKEIDVWSAGVMLYILLCGVP  
PFWGETEKTIFEAVLEGNLDLESSPWPTISESAKDLIRKMLARDPKKRIATAEALAHPLWTDSEVSDKPIDSAVLRMQLKFRAMNKLKALVIAENLS  
EEEIKGLKQMFKNIDTDFGSGTITFDELRTGLHRLGSKLSEIKQLMEAADVKDGTIDYIEFITATMHRHRLEKEEHLLEAFKYFDKDRSGYITRDELK  
HSMTQYGMGDATIDEVINDVDTDNDGRINIDYEEFVAMMTKGTTHSDAKLIR\*

>Brara.I00608 Org\_BrapaFPsc peptide: Brara.I00608.1.p (1 of 8) PTHR24349:SF166 - CALCIUM-DEPENDENT  
PROTEIN KINASE 11-RELATED (PAC:30643355)

MANKSRTRWVLPYTKNVEDYFLGQILGQGFQFGLTFLCKHTAQLACKSIPKRLKLCQEDYDVLREIQIMHHLSEFPNVVRIEGAYEDTSSVHIVM  
ELCEGGELFDRIIVKRGHYSEREAALIKTIVGVVEACHSLGVMHRDLKPNFLFASCDEBASLSTDFGLSVFCKPGATFSELVGSAYYVAPEVLKHHYS  
RECDVWSAGVILYILLCGVPPFWDESEFGIFRKLQKIDFETSPWPSISESAKDLIVKMLEKDPKRLTAHQVLCVHPWVDDKVPADKPLDCAVLSRLK  
NFSAMNKLKMAFRVIAERLSEEEIGGLKELFRMIDTNSGTITFEELKDTVVRGADLMESEIQELLRSADVDENGSIDYGEFLAATIHNLKLEREENL  
VAAFSFFDKDGSGYITVDELQHALKEFGINDSHLDEMIKIDIDQDNDGQIDYGEFVAMMRKNGSGGSRRTMRNTLNFANWVASS\*

>Brara.I01019 Org\_BrapaFPsc peptide: Brara.I01019.1.p (1 of 5) PTHR24349:SF83 - CALCIUM-DEPENDENT  
PROTEIN KINASE 6 (PAC:30646539)

MGNSCRGSFKDKTYEGNNLPEENSITITHVSSVHSPTTEQDFPKEDNNNNNKSPLVLPVKEPFMRNMDNQAYVVLGHKTPNIRDLYTLRSLKQGGQ  
FGTTYLCTEVATGVYACKSISKRKLISKEDVEDVRRREIQIMHHLAGHKNIVTIRGAYEDPLYVHIVMEVCAGGELFDRIIQRGHYTERKAAELTKIVVG  
VVEACHSLGVMHRDLKPNFLLVNDKDDFSLKAIIDFGLSVFVKPQIFKDVVGSPPYVAPEVLLKHYGPEADVWTAGVILYILLSGVPPFWAETQQGIFD  
AVLKGIDIDFESDPWPVISDSAKDLIRKMLCSNPSERLTAHEVMRHPWICENGVAAPDRALDPAVLSRLKQFSAMNKLKMAKLVIAESLSEEEIAGLRAMF  
EAMDTDNSGAIITFDELKAGLRRYGSTLKDTEIQDLMEAADVNSGTIDYSEFIAATIHNLKLDREHLLVSAFQYFDKDGSGYITIDELQQSCVEHGMDTV  
FLEDVIKEVDQDNDGRIDYGEFVAMMQGNAGIGRRTMRNSLNI SMRDA\*

>Brara.I02207 Org\_BrapaFPsc peptide: Brara.I02207.1.p (1 of 3) PTHR24349:SF23 - MAP KINASE-ACTIVATED  
PROTEIN KINASE 5 (PAC:30643178)

MGCCGSKSLPASPDLVTEREPAGTILGKPLVEFKKLYKLGELGKGFATTYMCQEISTGRSFACKSIPKRNLTSEAVKTEIEIMENLSGVSNIQVPHAS  
YEDKNFVHIVMELCRGGELFDRIHALVKSHRYYTEKDAAGIFKSI VNAVQICHSMNVIHRDVKPNFLFSSDDEESSKLAIDFGCSVYIKEGVELKEKV  
GSLYYIAPEVLRSEESYKKEIDIWSAGVILYILLSGSPFFGNDDEIKKGIIDFDSQPWPCISVGAADLIKRLNKNQKERISAENVLEHPWILSEAPDKPI  
DGVIAEGLSEEEIRSLKTMFESMDTDKSGSITYEELKTLNRLGSKLPEAEVKQLEMAADVNGTIDYIEFITATMQRHRLEDEHLKAFHLFDKDNS  
GYITKDELEIAMKEHGMGDEACAKEIISEIDKNYDGKIDYEEFCAMMRSVNLQGGQIHH\*

>Brara.I03514 Org\_BrapaFPsc peptide: Brara.I03514.1.p (1 of 3) PTHR24349//PTHR24349:SF145 -  
SERINE/THREONINE-PROTEIN KINASE // SUBFAMILY NOT NAMED (PAC:30643998)

MGNCCRSPAAREVAVKSNYSGHDPKRDSTNGKKSAPIRVLTDPKNIEDRYLLDRELGRGEFGVYLYLCTIERATRDLLACKSISKRKLRTAVDIEDVK  
REVAIMRHLPKSSSIVTLKEACEDDSAVHLMELCEGGELFDRIVARGHYTERAAAGVTKTIVEVVQLCHKHGVHRDLKPNFLFANKKENSPLKAIIDF  
GLSIFFKPGEKFSEIVGSPYYMAPEVLKRSYGPPEIDIWSAGVILYILLCGVPPFWAEESEQQGVAQAAILRGIIDFKREPWPNISETAKSLVQMLPEDPKRR  
LTAKQVLEHPWIQNAKAPNVPLGDIVVSRKQFSSMNRFRKRALRVIAEFLSSQEVEDIKEMFNKMDTDKGIIVTIEELKAGLRDFGTQLAESEVQMLI  
EAVDTKKGALDYGEFVAVSLHLQKVANDEHLRKAFSYFDKDGNGYILPEELCEALKEDGGDCCVDVANDIFQEVDTDKDGRISYEEFAAMMKTGTDRK  
ASRHSRGRFNSLSIKLMKDGSLNLGNE\*

>Brara.I03972 Org\_BrapaFPsc peptide: Brara.I03972.1.p (1 of 2) PTHR24349:SF126 - CALCIUM-DEPENDENT  
PROTEIN KINASE 32 (PAC:30646230)

MGNCCGSAGSLANNDNNKPTKGRKQNPFSIDYGLHHGNNNGVVKPLKLVLDPTGREISQKYKLGRELGRGEFGVYLYLCTDKETEVEFACKSILKK  
KLRTAVDIEDVRRREVEIMRHMPHPNVVTLKETYEDYIAVHLMELCEGGELFDRIVARGHYTERAAAAVTKTIEVVQVCHKHGMHRDLKPNFLFAN  
KKETAPLKAIDFGLSVFVKPGERFNEIVGSPYYMAPEVLKRNYPGEVDIWSAGVILYILLCGVPPFWAETEQQGVALAIIIRSQLNFRDPWPKVSENKDL  
IRKMLDPPDQKRRLTAQQVLDHPWLQNAKTAPNVSLGETVVARLQKQFTVMNKLKRALRVIAEHLSDDEASGIREGFQIMDNTQRGKINIDELKIGLQKLG  
HAVPQDDLQILMDAGDIDKDGYLDCDEFIAISVHLRKMGNDEHLKKAFAFFDQDNNGYIEIEELREALSDEVGTSEEVEVAIIRDVDTDKDGRISYEEFA  
TMMKTGTDRKASRQYSRERFNSISQKLMQDASLHVNSEAI\*

>Brara.I04763 Org\_BrapaFPsc peptide: Brara.I04763.1.p (1 of 3) PTHR24349:SF167 - CALCIUM-DEPENDENT  
PROTEIN KINASE 10-RELATED (PAC:30641261)

MGNVCVVRPPNPEESKPTPKPKTNQNRKLNPFSDIFRSPVRTRAAKDAVPTSHQTKITDKYILGRELGRGEFGITYLCTDRESREALACKSISKR  
KLRTAVDVEDVRRREVSIMSLPDPHPNVVVKLRATYEDGENVHLMELCEGGELFDRIVARGHYTERAAAGVARTIAEVVMCHVNGVHRDLKPNFLFAN

KKENSALKAIIDFGLSVFFKPGKEFKFIEVGSPPYMAPEVLKRDYGPVEDVWSAGVVIYIILLCGVPPFWAETEQQGVALAILRGVIDFKRDPWPQISESAKSL  
VRLQMLNPDPTRKRLTAQQVLDLHAPVWQNAKAPNVPLGDIVRSRLKQFSMMNRFKKKVLRVIAEHLISIQEVEVIKDMFSLMDEDDNDGRITYLELQAGLQKVG  
SQGEPEIKMLMEVADVDGNGFLDYGEFVAVI IHLQKIEDELFLKLAFFMFKDQGSTYIELDELREALTDELGEPDVSVLNDIMREVSDSKDGRINRYDEF  
VTMMKAGTDWRKASRQYSRERFKSLINLMKDGSLHLHDLATGQSVPV\*

>Brara.J01554 Org\_BrapaFPsc peptide: Brara.J01554.1.p (1 of 8) PTHR24349:SF166 - CALCIUM-DEPENDENT  
PROTEIN KINASE 11-RELATED (PAC:30611977)

MSDSQTMASESRTSWVLPYKTKNLDYVLDLDRVLGQGFQGTFLCTHSETGQKLACKSI PKRKLCCQEDCDVLRLEIQIMHHLSEYPNVVRIQSTYEDAN  
DVHLMELCEGGELFDRIEKKGHYSEREAALKIKTIVAVVEACHSLGVMHRDLKPENFLFSSDDEASLSTDFGLSVFCKPGATFTQLVGSAYVVAPEV  
LHRHYGRECDVWSAGVILYIMLCGFAPFDAGTQYGFIRKILQGLKDFETSPWPSISESAKDLIKKMLSNPKKRLTAHQVLCHPWIVDDTVAPDKPLDFA  
VVSRLKRFSAAMNKLKMLRIVAERLSEEEIGGLKELFKMIDTNSGTITFEELKDSIRRVGSELVESEIQELLQAAADVDESSTIDYGEFLAATIHNLKL  
EREENLVDAFSFFDKDASGCITIDELQQAOWNQFGIKDSHLDEMIKDIDQNDNGQIDYGEFVAMMRKGNVGISRRTMRNLTSFENPPQESNE\*

>Brara.J01642 Org\_BrapaFPsc peptide: Brara.J01642.1.p (1 of 3) PTHR24349:SF116 - CALCIUM-DEPENDENT  
PROTEIN KINASE 7 (PAC:30611728)

MGNCCATPGSDSKSKDAKPKTRNNPFYSEAYTTNRSAGFKLSVLKDPDTHGDIITLMDYDLGREVGRGEFGITYLCTDINTGEKYACKSISKKKLRTAVDI  
EDVRREVEIMKHMPKHPNIVSLKDAFEDDDAVHIVMELCEGGELFDRIIVARGHYTERAAAAVMKTIIEVVQVCHKNGVMHRDLKPENFLFANKKETSPLK  
AIDFGLSVFFRPGEGFNEIVGSPYMAPEVLRNRYGPEVDIWSAGVILYIILLCGVPPFWAETEQQGVAQAIIRSVDFKRDWPVRVSDTAKDLVRKMLEPD  
PKKRLSAAEVLHESWIQNAKAPNVSLGETVKARLKQFSVMNKLKRALRVIAEHLSEVEVAGIKEAFEMMDSNKTGKINLEQLKHLGLKGLQQMADAD  
LQILMEAADVDGDTLNYGEFVAVSVHLKMANDEHLKAFSFFDQNSNYIEIEELRQALNDEEDTSSSEEVIAAIMQDVTDKDGRISYEEFVAMMKAG  
TDWRKASRQYSRERFNSLSLKLMDRGSQLEGET\*

>Brara.J01648 Org\_BrapaFPsc peptide: Brara.J01648.1.p (1 of 5) PTHR24349:SF131 - CALCIUM-DEPENDENT  
PROTEIN KINASE 17-RELATED (PAC:30611859)

MGNCCAHGREPTQEKGLDGAEEASVKASRHSPPATKQGGPIGVLGRPMEDVKSSYSLGKELGRGQFGVYTLCTQKATGLQFACKTIAKRKLNVNKE  
DIEDVRREVQIMHHLTGQPNIVELKGAYEDKHNVHLMELCAGGELFDRIIAKGHYSERAAAASLRTIVQIHTCHSMGVIHRDLKPENFLLLNKEENSP  
LKATDFGLSVFYKPGEEFKDIVGSAYYIAPEVLKRYGPEADIWSIGVMYIILLCGVPPFWAEESENGIFNAILSGQIDFASDPWPAISHQAKDLVRKMLN  
SDPKQLRTAAQVNLNHPWIKEDGEAPDVLNDAVMSRLKQFKAMNFKKVALRVIAAGCLSEEEIMGLKEMFKGMDTDSGTITLLELRQGLAKQGTSLSEY  
EVQQLMEAADADNGTIDYGEFIAATMHINRLDREHLSAFQHFDDKNSGYITMEELEQALREFGMSDGRDIKEIIEVSDGNDGRINVEEFVAMMRK  
NPDNPKKRELSFDTT\*

>Brara.J02143 Org\_BrapaFPsc peptide: Brara.J02143.1.p (1 of 3) PTHR24349:SF116 - CALCIUM-DEPENDENT  
PROTEIN KINASE 7 (PAC:30612058)

MGNCCGSPSATIESGHGPKKNKNNPFHSNEANGSGAGFKLSVLKDPDTHGDISSQYDLGREVGRGEFGVYTLCTDIQTGDYACKSISKKKLRTAVDIGD  
VRREVEIMRHPKHPNIVSLKDSFEDDDAVHIVMELCEGGELFDRIIVARGHYTERAAAAVMKTIIEVVQVCHKQGMHRDLKPENFLFANKKESALKAI  
DFGLSVFFKPGEQFNEIVGSPYMAPEVLRNRYGPEIDVWSAGVILYIILLCGVPPFWAETEQQGVAQAIIRSVDFKRDWPVRVSESADLVRKMLEPDPK  
KRLSAAEVLHETWILNAKAPNVSLGETVKARLKQFSVMNKLKRALRVIAEHLSEVEEAGIKEAFEMMVDNKRGINLEELKYGLQKAGQIADADLQI  
LMEATDVDGDTLNYGEFVAVSVHLKMANDEHLKAFNFDDQNSGYIETEELREALNDELDETSSEEVIAAIMQDVTDKDGRISYEEFAAMMKAGTD  
WRKASRQYSRERFNSLSLKLMDRGSQLEAGE\*

>Brara.J02172 Org\_BrapaFPsc peptide: Brara.J02172.1.p (1 of 5) PTHR24349:SF131 - CALCIUM-DEPENDENT  
PROTEIN KINASE 17-RELATED (PAC:30612624)

MGNCCSNGRDSGDNDGTRGITASNAGPTAEASVPQSKHAPPSPPPATKQGGPIGVLGRPMEDVKSSYSLGKELGRGQFGVTHLCTQKATGQQFACKTIAK  
RKLNVKEDIEDVRREVQIMHHLTGQPNIVELKGAYEDKHSVHLMELCAGGELFDRIIAKGHYSERAAAASLRTIVQIVHTCHSMGVIHRDLKPENFLLL  
SKDEKAPLKATDFGLSVFYKPGVEFKDIVGSAYYIAPEVLKRYGPEADIWSIGVMYIILLCGVPPFWAEESENGIFNAILKSHVDFSSDPWPSISPQAK  
LVKMLNSDPKQLRTAAQVNLNHPWIKEDGEAPDVLNDAVMSRLKQFKAMNFKKVALRVIAAGCLSEEEIMGLKEMFKGMDTDSGTITLLELRQGLAKQ  
GTRLSEYEVQQLMEAADADNGTIDYGEFIAATMHINRLDREHLSAFQHFDDKNSGYITMEELEQALREFGMNDGRDIKEIIEVSDGNDGRINRYDEF  
VAMMRKGNPDPIPKRRDLSFK\*

>Brara.J02705 Org\_BrapaFPsc peptide: Brara.J02705.1.p (1 of 4) PTHR24349:SF161 - CALCIUM-DEPENDENT  
PROTEIN KINASE 1-RELATED (PAC:30611720)

MGNTCVGPSPRNGFLQSVSAAMWRPRDGDSDSVSNGDSTSEAAVSGELRSPSPDPHQVLNKPPEHLTMPKPVETKAKSDVLETQPESPKPKADASP  
PKPKPKMKRVTSAGLRTEVLRQRTENFKFYSYLRKGLGQGFQGTFLCQVEKATGKEFACKSIAKRKLSDDEDVDRREIQIMHHLGHPNIVISIKGAY  
EDVVAVHLVMECCAGGELFDRIIQRGHYTERKAAELTRTIVGVVEACHSLGVMHRDLKPENFLVSKHEDSLKTIIDFGLSMFFKPDVDFVTVVGSPPYV  
APEVLRKQYGPEDVWSAGVIVYIILLSGVPPFWAEESEQGI FEQVLHGDLDFSSDPWPSISESAKDLVRKMLVRDPKRLTAHQVLCHPWVQVGVADPK  
LDSAVLSRMKQFSAMNKKFKMALRVIAESLSEEEIAGLKEMFNMIADQSGQITFEELKAGLKRVGANLKESEIIDLMAQADVNSGTIDYKEFIAATLH  
LNKIEREDHLFAAFTYFDKDGSGYITPDELQQAEEFVGVDRIEEMMRDQDNDGRIDYNEFVAMMQKSGITGGPVKMGLEKFSIALKL\*

>Brara.K00298 Org\_BrapaFPsc peptide: Brara.K00298.1.p (1 of 5) PTHR24349:SF83 - CALCIUM-DEPENDENT  
PROTEIN KINASE 6 (PAC:30646929)

MGNSCRGSFKDKLQTNNSNKLKEDNSKTSTNVTNSRSSSTNTEEFSPKKNNSKNSPLVIPSKEPIMRRNMDNQAYYIILGHKTPNIRDLYTLRKLQGG  
QFGTTLCTELTTSVDYACKSISKRKLISKEDVEDVREIQIMHHLGAGHNIVTIKAYEDFLYVHIVMELCAGGELFDRIQIRGHYSERKAAELTKIIV  
GVVEACHSLGVMHRDLKPENFLVNLKDDFSLKAIIDFGLSDFFKPGQIFITDVSFSPYVVAPEVLNKRYPGPEADVWTAQVILYIILLSGVPPFWAETQQGIF  
DDVLKGYIDFSDPWVPI SNSAKDLIRRLSSKPAERLTAHEVLPYIHIKAYIYLFAGHPWICKNGVAPDRPLDPAVLSRLKQFSAMNKLKMLKALVIA  
ESLSEEEIAGLREMFQAMDTNSGAIITFDELKAGLRKYGSTLKDTEIHDLMEEAADVNSGTIDYSEFIAATIHNLKLEREEHLVAAFQYFDKDRSGYITI  
DELQQTCEVHSMTDVFLIEDI KEVDQNNNGQIDYGEFVEMMQKGNAGVGRRTMRNSLNINMRDA\*

>Brara.K00706 Org\_BrapaFPsc peptide: Brara.K00706.1.p (1 of 2) PTHR24349:SF95 - CALCIUM-DEPENDENT  
PROTEIN KINASE 3 (PAC:30614569)

MGHRHSKSKSSGPPSSSSSSSTNVVHVQPSGERRGSSGSPVPGSSSTGGSRSAASAQQNGRILGRPMENVRGTYDFGKELGRGQFGVYTLVTHKE  
TKLFAKSIPTRRILVHRDDIEDVRREVQIMHHLGHRNIVDLKAGYEDRHSVNLIMELCEGGELFDRIIAKGHYSERAAAADLCRQMVVHVSCHSMGVM  
HRDLKPENFLSKDENSLKATDFGLSVFVKPGDKFDLGVSAAYVAPEVLKRYGPEADIVSAGVILFILISGVPPFWGENETGIFDAILKGLDFSA  
DPWPTVSAGAKDLVKKMLKYDPKDRLTASEVLNHPWIKEDGEASDKPLDNAVLSRMKQFRAMNKLKMLNVIENLSEEEIIGLKEMFKALDTPKNGIV

TLEELRTGLPKLGNKISEAEIKQLMEAADMDGDGSDIDYLEFISATMHHNRIEREDHLYTAFQYFDKDNSGYITMEELEQAMKKYNMGGDDKSIKEIIAEVD  
TDRDGKINYEFEVAMMKGNPELVNRRRVNM\*

>Brara.K01255 Org\_BrapaFpsc peptide: Brara.K01255.1.p (1 of 5) PTHR24349:SF89 - CALCIUM-DEPENDENT  
PROTEIN KINASE 29 (PAC:30614939)

MACLCINFKKKPKKPIPVSNQENTEFESGESTKKQPLRQQTAPRANIQIVVQPHKLPLPVPVISHPQEQQLMHQPEPISGKPFEDVKETYSLGRRELQ  
ISSGKNFACKSILKRLKIRTQDREDVREIQIMQYLSGQPNIVEIKGAYEDRQSVHLVLMELCEGGELFDKISKRGHYSEKAAAEIIRCVKVVVEICHFMG  
VIHRDLKPENFLLSGKDEASAMKATDFGVSVFIEEGKVYKDIVGSAYYVAPEVLKRNNGKEIDWISAGVILYILLCGTPEFWAETDKGIFEEILRGEID  
FEFKPWPSSISEAKDLVMMMLKSDPKSRYTASQVLEHPWIREGGEASDKPIDSAILSRMKQLQAMNKLKLLKLFIAQSSKFFDR\*

>evm\_27.TU.AmTr\_v1.0\_scaffold00001.145 Org\_Atrichopoda peptide:  
evm\_27.model.AmTr\_v1.0\_scaffold00001.145 (1 of 2) PTHR24349:SF89 - CALCIUM-DEPENDENT PROTEIN KINASE 29  
(PAC:31551023)

MGDCFSKPKFPESPPRRLTPVSNSSPVPSLPKKEQPTRPANRPSHQQRKTPATPSNPSANRQPLPLTSALKSHVSAENTILGKPMVDVSSLYALDREL  
GRGQFGVTYLCTERTTGLQYACKSVSKRKLMSKSDVEDIKREVLILQHLTGQPNIVEFKGAYEDKQSVHVMELCSGGELFDRIIAKGSYSERAAASVCR  
AIVNVVYVCHFMGMHRDLKPENFLLSKDENAALKATDFGLSVFIEEGKVHREIVGSAYYVAPEVLRNNGKEIDVWSAGVILYILLSGVPPFWAETEK  
GIFDAILQGDIDFASDPWPSISNSAKDLIRKMLTQDPKNRITASQVLEHPWMKADAASDKPISSAVLTRMKQFRAMNKLKLLKLVIAENLSEEEIKGLK  
QMFKNMDTDGSGTITYEELRAGLNRLGSRLEAEVQQLMDAADVDRSGSIDYIEFITATMHRHRLEREENLYKAFQYFDTDNSGFITRDELEIAMKDYGM  
GDDATIKEVIQEVDTDNDGRINYQEFVAMMRK\*

>evm\_27.TU.AmTr\_v1.0\_scaffold00002.445 Org\_Atrichopoda peptide:  
evm\_27.model.AmTr\_v1.0\_scaffold00002.445 (1 of 1) PTHR24349:SF167 - CALCIUM-DEPENDENT PROTEIN KINASE  
10-RELATED (PAC:31562350)

MGNCCVKVGNSSSSSTSSRRRKHNRKRNPFPAEDLGLDPCGTPRLRVLKKEAAVGCNITDKYILGRELGRGEFGVTYLCTDKETREALACKSISKRK  
LRTAVDVEDVRREVAIMSSLPEHPNVVRLKAAAYEDSEAVHLMELCEGGELFDRIIVARGHYSERAAANVTRTIVEMCHKNGVMHRDLKPENFLYANKKEN  
APLKAIDFGLSVFFRPFGERFSEIVGSPYYMAPEVLKRNNGPEVDVWSAGVILYILLCGVPPFWAETEQGVAQAILRVVIDFKRDPWPKVSDSAKSLVRQM  
LES DPRRRLSAQQVLEHPWLTNAKAPNIPLDIVRSRLKQFVSMNRFKKALGVIAEHLSSVEVEIIRDMFKLMDTDNNGKVTFEELKAGLKKVGSQLA  
ESEMKLMEAADVDGNGALDYGEFVAVTIHLQRMENDEHFRRAFMFDDKDGSGFIEIDELREALMDESQGTDTTEVLNNIMREVDTKDNRISYEEFVSM  
KGTDRKASRHSYRERFKNLSVNLKMGDSLKMTDDFGV\*

>evm\_27.TU.AmTr\_v1.0\_scaffold00004.174 Org\_Atrichopoda peptide:  
evm\_27.model.AmTr\_v1.0\_scaffold00004.174 (1 of 1) PTHR24349:SF161 - CALCIUM-DEPENDENT PROTEIN KINASE 1-  
RELATED (PAC:31550478)

MGNTCVGPSTLTKNGFQTVSAAASGPYRLWRARTPEEMLPDNTENTDDHHQPNSKTETPPIPNKPPETVRIQENESNPTPTKPKKPNASVMKRISAG  
LQIDSVLQRKTEILKEHYSGLRKLQGGQFGTFLCIEKATGKEYACKSIAKRKLTEEDVEDVREIQIMHHLAGHPNVISIKGAYEDAVAVHVMELCA  
GGELFDRIIQRGHYSERKAADLARIIVSVVEACHSLGVMHRDLKPENFLVDTNEESPLKIDFGLSIFFKPGTFTDVGSPYYVAPEVLKHYGPEAD  
VWSAGVILYILLSGVPPFWAETEQGIFEQVLHGELDFSSPEWPGISESAKDLIKRMLRNPKKRLTAHEVLCHPWVQDDGVAPDKPLDSAVLTRLKQFSA  
MNKLLKMLRVIAESLSEEEIAGLKEMFKMIDTDGSGSITFEELKAGLKRVGANLSEIHALMEAADIDNNGSIDYGEFIAATLHLNKAEREDHLFAAF  
SYFDKDGSGYITQDELQOACEEFGIEDVRLSEEMIREVDQDNDGSDIDYNEFVAMMQKGNPVFGKGLQNNFSIGFRGALKLG\*

>evm\_27.TU.AmTr\_v1.0\_scaffold00007.62 Org\_Atrichopoda peptide: evm\_27.model.AmTr\_v1.0\_scaffold00007.62  
(1 of 1) PTHR24349//PTHR24349:SF145 - SERINE/THREONINE-PROTEIN KINASE // SUBFAMILY NOT NAMED  
(PAC:31557595)

MGNCCRSPAAAAREDVKSNSVHDQSKKEGNSNKKLTVLSGSIKGGVDEKYVVDRELGRGEFGVTYLCTIDRSTQELLACKSISKRKLRTTVDIEDVRE  
AIMNHLPIHSNIVSLKTECEDENAVHLMELCEGGELFDRIIVARGHYTERAAAGVTKTIVEMVQVCHKHGVIHRDLKPENFLFANKKENSPLKAIDFGLS  
IFFKPGTFSBIVGSPYYMAPEVLKRNNGPEIDVWSAGVILYILLCGVPPFWAETEQGVAQAILRGLIDFKRDPWPSISENAKSLVRQMLPEPDKLRLTA  
KQVLEHPWLNKAKAPNVPLGDIVTRLKQFMSLNFRKRALRVIAEHLSSIEEVEDIKEMFKMMDTDNDGTVTYEEELKAGIQKLSQLSADVQLLMEAV  
DADGNGTLDYGEFIAVSLHLQRMENDEHLRKAFFSYFDKDGNGFIEPEELREALVEDGITDSDVDANDIFLEVDTKDGRISYEEFLAMMKTGTDRKAS  
HSRGRFNLSIRLMKDGSLNAGSKK\*

>evm\_27.TU.AmTr\_v1.0\_scaffold00010.325 Org\_Atrichopoda peptide:  
evm\_27.model.AmTr\_v1.0\_scaffold00010.325 (1 of 2) PTHR24349:SF131 - CALCIUM-DEPENDENT PROTEIN KINASE  
17-RELATED (PAC:31573023)

MGMCLSHQETPPEYPTKPGNHTPHHPSPGNHTPRHGNTPHNPSPGNHTPHRRSPNHTPPLSPARFFNLRPRVGTVLGRPLADVWASYSKGLGRGQFG  
ITHLCTDLSTGRQLACKTIAKRKLTHKDDIEDMRREVQIMHHLAGHESIVELVDSFEDRHSVNLVGLCSGGELFDRIIKRGHYSEREAAGLVRAMARV  
HTCHSMGVVHRDLKPENFLFLSEEEEDSPLVVTDFGLSVFYKPGDVFKDVVGSAYYVAPEVLKRNNGPEIDVWSAGVILYILLCGTPEFWAESDEGIFDEI  
MRGLIDFRSEFPWPSISAGAKDLVRKMLNPDPKQRLTAFQVNLNRWTKEDGEASDTPLDNAVLNRLKQFRAMNFKKIALRVIAKGLSEEEIMGLKEMFKG  
MDRDKSGTITFEELRRLAAGQSKLTETEVKQLMEAADVDGNGTIDYDEFVATMRLNKHKEDHLYTAFQYFDRDNSGYITKEELEQALREHGLYDGRD  
IRDIIAEVDADNDGRINYDEFAAMNKENAEPKAKKRQDIFAYDPK\*

>evm\_27.TU.AmTr\_v1.0\_scaffold00017.52 Org\_Atrichopoda peptide: evm\_27.model.AmTr\_v1.0\_scaffold00017.52  
(1 of 1) PTHR24349:SF166 - CALCIUM-DEPENDENT PROTEIN KINASE 11-RELATED (PAC:31570163)

MKKGLAASIMASPVLRQNGNLRDLYLIGRKLQGGQFGTTLCTEKATGKEYACKSIAKRKLICMEDIEDVREIEIMHLSGHPNVVTKIGAYEDSVFV  
HLVLMELCAGGELFDRIIQKGVSEFQAHLIKVIVGVVEACHSLGVMHRDLKPENFLFLSEDEDAFLKATDFGLSVFYQGETFTDVGSPYYVAPEVLR  
KHYGPESDVSAGVILYILLSGVPPFWAETEQGIFRQILQGPLDFESEPWPGISESAKDLIRKMLNRNPKKRVTAHEVLCHPWIVDSDVAPDRPLDSAVL  
SRLKQFTAMNKLKMLKLVIAESMSEEEIGLKLKELFKMIDTDGSGTITFEELKEGLKRVGSELMSEIKALMDAADLHSGTIDYGEFLAATMHLNKMER  
EENLASAFSYFDKDGSGYITIDELQOACREFGLSDFHLLDDMIQEIQDNDGRIDYSEFAAMRRNGGVRKTMRSNLNIMRDLKISDQ\*

>evm\_27.TU.AmTr\_v1.0\_scaffold00044.74 Org\_Atrichopoda peptide: evm\_27.model.AmTr\_v1.0\_scaffold00044.74  
(1 of 1) PTHR24349:SF83 - CALCIUM-DEPENDENT PROTEIN KINASE 6 (PAC:31575378)

MGNSCRGSFRNTVIQYGETDRSGRTNGSVDRSNDSDYSPHLSQVIAEFAKDNKSRGNPGSNIFDLSTKDNIMRRGGENQTYVYLGHKTENIRDL  
YTLGRKLQGGQFGTTLCTEITATGKEYACKSISKRLISKEDVEDVREIQIMHLSGHNKVVTKIGAYEDSLRFVHVMELCSGGELFDRIIQRGHYSER  
KAAELTKIIVGVVEACHSLGVMHRDLKPENFLLVNKDDSSSLKAIIDFGLSVFFKPGQVFTDVGSPYYVAPEVLCKHYGPEADVWTAGVILYILLSGVPP

FWAETQQGIFDAVLKGVDFETDPWPVVISDSAKDLIKKMLCWRPSERLTAHEVLCHPWICENGVPDRPLDPAVLSRLKQFSAMNKLKMMALRVIAESLS  
EEEIAGLREMFTAMDITDNSGAIITFDELKAGLKRYGSNLKESIEIRLDMAADVDNSGTIDYGEFVAATVHLNKLREHEHLVAAFSYFDKDGSGYITVDELO  
HACSEHNISDVPIEDIIREVVDQDNDGRIDYNEFVAMMLKGNGLGRRTMRNSLNVSMRDPAGAH\*

>evm\_27.TU.AmTr\_v1.0\_scaffold00103.111 Org\_Atrichopoda peptide:  
evm\_27.model.AmTr\_v1.0\_scaffold00103.111 (1 of 1) PTHR24349:SF93 - CALCIUM-DEPENDENT PROTEIN KINASE 14  
(PAC:31567028)

MGNCCSNPGEENQKTQKQKKNPFPVSDYPGSYNSNSGSKPPVLKDPTRDIASRYDLGRELGRGEFGITYLCTDRDTEVLAACKSISKKLRTAVDIE  
DVRREVAIMGHLPKHPNIVSLKDTYEDDNAVHLMELCEGGEFDRIVARGHYTERAAAVVTRTIVEVVQLCHKHGMHRDLKPNFLFANKKETSPLKA  
IDFGLSVFFFKPGEHFSEIVGSPYYMAPEVLKRNYPGEVDVWSAGVILYILLCGVPPFWAETEQQVAQAIIRSVIDFKRDPWPKVSDNANLNVKRMLEPDP  
KLRLTAQEVLDHPWLQNAKAPNVSLGETVRRARLKQFSVMNKLKRALRVIAEFLSVEEAAGIKDTFQMMDINNNGKITFEELKVLGLQKIGQQAQDADVQ  
MLMEAADADGDGTLYAEFVAVSIHLRKGNDHLRKAFLYFDQNSQGYIEIEELRDSLADDLADNCEEVINAIHDVDTDKDGRISYDEFATMMKAGTD  
WRKASRQYSRERFTSLSLKLLQDGSLLQTN\*

>evm\_27.TU.AmTr\_v1.0\_scaffold00158.18 Org\_Atrichopoda peptide: evm\_27.model.AmTr\_v1.0\_scaffold00158.18  
(1 of 1) PTHR24349:SF95 - CALCIUM-DEPENDENT PROTEIN KINASE 3 (PAC:31561650)

MGNCGVPTDEEQHEAAAALPHNSKTGIHVSPAPPKPKVSHLQTHLSASPSPPQHIAGIGRILGRPMEDGRSTYIFGKELGRGQFGVTYMCTHRET  
KEVLACKSIATRKLITKDDIEDVREVEQIMHHLTGHRNIVELKGAIEDRNSVNLVMELCAGGELFDRIIAKGHYTERAAATLCREIVTVVHTCHSMGVMH  
RDLKPNFLFLNKDEASPLKATDFGLSVFFFKPGEVFRDLVGSAYVAPEVLRHYGVEADIWSAGVILYILLSGVPPFWAENEHGI FDAILRGHIDFSSD  
PWPSISSGAKELVKKMLKADPTDRLSAIQILNHPWIREDVGSADQPIDVTVLTRMKQFRAMNKLKVALKVIAENLSEEEIMGLKEMFRSMDTNSGTIT  
FEELKAGLPLKLGTRISESEVRQLMEAADVDGNGTIDYIEFITATMHLNRMEKEDHLYTAFYFDKDKSGYITMEELEQALKKYNMGDEKTINEIIAEVDT  
DRDGRINYDEFVTMMRKNQDMAANRRRSVTVGAPKYK\*

>evm\_27.TU.AmTr\_v1.0\_scaffold00269.4 Org\_Atrichopoda peptide: evm\_27.model.AmTr\_v1.0\_scaffold00269.4 (1  
of 2) PTHR24349:SF131 - CALCIUM-DEPENDENT PROTEIN KINASE 17-RELATED (PAC:31567349)

MGMCFSQAGKRGPKPDANAKEPPSGPKPDPPIATSKPTPTPPSPKPPPIGVLPGRPMEDVRATYIMGKELGRGQFGITHLCTHKATGQPFACKTIAKRKL  
VNKEDIEDVREVEQIMYHLTGQPNIVELKGAIFEDKQSVHLMELCAGGELFDRIIAKGHYTERAAAALMRTIVQIVHTCHSMGVVHRDLKPNFLLLSKD  
EDAPLKATDFGLSVFFFKQGEVFRDIVGSAYYIAPEVLKRYGPEVDIWSIGVMYILLSGVPPFWAENEHGI FNAILRGQIDFTSDPWPSISVGAIDLK  
KMLNSDPKHLRTAFQVLSHPWIKDGEAPDIPLDNAVLSRLKQFRAMNKKKVALKVIAENLSEEEIMGLKEMFNMDTNSGTITLLEELKQGLSKQGTKL  
SEYEVKQLMEAADADGDGTIDYDEFITATMHNMRDREEHLYTAFYFDKDKNSGYITPEELEQALLEYGMHDGRIDKIDLSEVDADNDGRINYDEFVAMM  
RKGNEANPKKRRDKFV\*

>GSVIVG01000238001 Org\_Vvinifera peptide: GSVIVT01000238001 (1 of 1) PTHR24349:SF166 - CALCIUM-  
DEPENDENT PROTEIN KINASE 11-RELATED (PAC:17816817)

MHRDLKPNFLFDTTAEDAALKATDFGLSVFYKPGETFSDVVGSPYYVAPEVLCKHYGPEADVWSAGVILYILLSGVPPFWAETETGIFRQILQGLDFE  
SEPWPCISETAKELLRKMLDRNPKRLTAHEVLSHPVWVDDRMADPKPLDSAVLSRLKQFSAMNKLKMMALRVIAEGLSEEEIGGLRELKFMIDTNSGT  
ITFDELKGLKRVGSELMESEIRDLMAADIDNSGTIDYGEFLAATVHLNKLREENLVSAFSSFFDKDKSGYITIDELQOACEFGLSEAHLDMMIKEID  
QDNDGQIDYGEFAAMMRKGGGIGRRTMRNLLNGLDVLGIPDMRLTN\*

>GSVIVG01001931001 Org\_Vvinifera peptide: GSVIVT01001931001 (1 of 1) PTHR24349:SF161 - CALCIUM-  
DEPENDENT PROTEIN KINASE 1-RELATED (PAC:17817910)

MHRDLKPNFLVNEEEDSLKTIIDFGLSVFFFKPGEKFTDVGSPYYVAPEVLRKRYGPEADVWSAGVILYILLSGVPPFWAETEQQGIFEQVLHGDLDFS  
SDPWPSISESAKDLVRRMLVRDRRLTAHEVLCHFPWVQDGVADPKPLDSAVLSRLKQFSAMNKLKMMALRVIAENLSEEEIAGLKEMFKMIDTNSGT  
ITFEELKAGLKRVGANLKESEIYIDLMAADVDNNGTIDYGEFIAATLHLNKLVEREDHLFAAFSFDKDKSGYITPDELQOACEFGLDVRLEEMIREVD  
QDNDGRIDYNEFVAMMQKGNPGIGKGLQTSFSMGFREALKH\*

>GSVIVG01008077001 Org\_Vvinifera peptide: GSVIVT01008077001 (1 of 2) PTHR24349:SF167 - CALCIUM-  
DEPENDENT PROTEIN KINASE 10-RELATED (PAC:17820750)

MELCEGGEFDRIVARGHYSERAAAGVARTIAEVVRMCHENGVIHRDLKPNFLFANKRESSPLKAIIDFGLSVFFRPFGERFSEIVGSPYYMAPEVLKRN  
Y GPEVDIWSAGVILYILLCGVPPFWAETEQQVALAILRGVIDFKREPWPQISDNKSLVRQMLEQDPRKRLTAQQVLEHSWLQNAKAPNVPLGDIVRTRL  
KQFSCMRNFKKAMRVIAEHLVSVEVEVIRDMFTLMDTDNDGKVTYEELKAGLRVGSQGLPEIKLLMEVADVDGNGVLDYGEFVAVT IHLQRMENDEH  
FQRAFMMFFDKDNGFIDLIELQEALADESGETDADVVNEIMREVDTDKGRINYDEFVAMMKTGTDRWKASRQYSRERFKSLSLNLMKDGSLHLEDRLITG  
QSIIV\*

>GSVIVG01008749001 Org\_Vvinifera peptide: GSVIVT01008749001 (1 of 4) PTHR24349:SF89 - CALCIUM-DEPENDENT  
PROTEIN KINASE 29 (PAC:17821297)

MGFCFSRPRDIPISSSSSDGDFTNHHYQPIPISSSKESLDIPPLSMSVPKPPTSSQIGTVLGRPLCEITSYIDIGKELGRGQFGITYLCTEKSTGLKY  
ACKSISKRKLKSGKDIEDVKREILILEHLTGQPNIVEFKGAYEDKQNLHLMELCSGGELFDRIITAKGSYSEREAADICRQIVTVVHVCHFMGMHRDLK  
PENFLMVSREENSPLKATDFGLSVFIEDNEVYKDVVGSAYVAPEVLRSSYKGEIDVWSAGVILYILLSGVPPFWGENEKSIFDAVLQGYVDFDSAPWPS  
ISSAKDLIKKMLMDPKRRTITASDALNHPWLREDEGASDKPIDSAVLRMKQFRAMNKLKALKLVIAENLSEEDIKGLKQMFNMDTDRSGTITFEEL  
KTGLSRLGSKLSELEIKQLMDAVDQNGTLDYTEFITATMQRRHLEKEENLFKAFQFFDKDGSFITREELKQAMTQYGMGDEATIDEVIDDVTDKDG  
RINYEFEVAMMKGPQDTELKQR\*

>GSVIVG01010743001 Org\_Vvinifera peptide: GSVIVT01010743001 (1 of 3) PTHR24349:SF126 - CALCIUM-  
DEPENDENT PROTEIN KINASE 32 (PAC:17822813)

MHSYSMNGAHTLIMTSLRNTNPMGGCISMPAKAGQKKKAKAKKIIPESGDDVFRKSVTIRPISVLKEPSGKDIYKTYRLGKELGRGEFGVTHQCDFDLETG  
EIFACKTISKSKLTTEIDIQDVRREVEIMKHLKHPNIVRLKEAYEDKDNVHLMELCEGGEFDRIVARGHYTERAAADVTRTIVEIILQICHQHGMHR  
DLKPNFLFADASEASPLKAIIDFGLSIFFKPGRFNEIVGSPYYMAPEVLRHYGPEVDVWSAGVILYILLCGVPPFWAETEQQVAQAIKVSVDPERDP  
WPHVSEDADKDLVRSMLDPNPNYRLTVEEVLHAPWIKNATSIPNVSLGENVTRIKQFSLMNKFKRVLRVVADNLPNEQRDGIQIFHMMDTDKNGNLSF  
EELKDLGHLKIGHVPADPDVKMLIEAADMDGTGLNCDVFVTSVHLRKISSDENLSEAFRAFDKNDSGYIEFEELREALREDNLGPNNEQVIQDIIFDVD  
LDKDGRIYSYDEFKAMMKTGMWKMSSRQYSRAMLNLSMRIFKDKSMPLQNKSMQLENRSMLLNKNSMRLQNVFV\*

>GSVIVG0101167001 Org\_Vvinifera peptide: GSVIVT0101167001 (1 of 3) PTHR24349//PTHR24349:SF145 -  
SERINE/THREONINE-PROTEIN KINASE // SUBFAMILY NOT NAMED (PAC:17823124)

MVDRELGRGEFGYCELEGGGLCHKHGVIHRDLKPENFLFANKKENSPLKAIIDFGLSIFFFKPGERFSEIVGSPYYMAPEVLKRNYPGEIDIWSAGVILYILL  
CGVPPFWAESEQGVQAAILRGLIDFKRDPWPNISESAKSLVRQMLEPDPKRLRLTAKQVLEHSLWLNQAKKAPNVPLGDVVVKARLQKFSMMNRFKRKALRVI  
ADHLSSTEEVEDIKESFKKMDTNDGIVSIEELKSGLRKFGSQLABAEVQMLIETVDTNGKGTLDYGEFVAVSLHLQRMANDEHLRKAFFSYFDRDNGNGYIE  
RDELRLDALMEDGADCTDVANDIFQEVDTDKDGKISYDEFAAMMKTGTDWRKASRHSYRGRFNSLSIKLMDKGSNLNGNE\*

>GSVIVG01012730001 Org\_Vvinifera peptide: GSVIVT01012730001 (1 of 4) PTHR24349:SF89 - CALCIUM-DEPENDENT  
PROTEIN KINASE 29 (PAC:17824232)

MGCFSKSERVTERDIIKGRSERGAPTQTYHQPPPPQPLKPSHPNTRAIQKPDITLGRPFDDIKHYITLGLKELGRGQFGVYLYCTQNSTGNTYACKSILKR  
KLVTKNDKEDIKREIQIMQRLTGQPNIVEFKGAYEDRHSVHLVMELCAGGELFDRIISQGHYSERAAAAICRAIVNVVHICHFMGMVHRDLKPENFLLS  
KDEAAMLKATDFGLSVFIEEGKVYRDIVGSAYYVAPEVLRNRYGKEIDIWSAGVILYILLSGVPPFWAETEKGIFDAILQGEIDFESQPWPAISNGAKDL  
VRKMLTQDRNKRITSAQVLEHPWIREDGEASDKPIDSAVLSRMKQFRAMNKLKLLKLVIAENLSEEEIKGLKAMFTNMDTKSGTITYEELKSGLARLG  
SRLSETEVQQLMEAADVDGNGTIDYIEFITATMHRHRLERDEHLYKAFNYFDKDNSGFI TRDELENAMKEYGMGDEDSIKEINEVDTDKDRINRYKEFC  
TMMRSQTQPPVKLF\*

>GSVIVG01019446001 Org\_Vvinifera peptide: GSVIVT01019446001 (1 of 1) PTHR24349:SF95 - CALCIUM-DEPENDENT  
PROTEIN KINASE 3 (PAC:17829068)

MHHLTGHRNIVELKAYEDRHSVNLVMELCAGGELFDRIIAKGHYSERAAAAALCRQIVTVVHNCHTMGMVHRDLKPENFLFLSTAEDSPLKATDFGLSVF  
FKPGDVFVKDLVGSAYYVAPEVLRNRYGAEADIWSAGVILFILLSGVPFFWGENEQSIFDFTILRGHIDFSSDPWPSISNSAKDLVKKMLRADPKERLTAID  
VLNHPWMKEDGASDKPIDIAVLRVQKFRAMNKLKLLKLVIAENLSEEEIIGLKEMFKSMDDTNSGTITYEELKNGPLKLGTKLSESEVRQLMEAADVD  
NGTIDYIEFISATMHNMRMEREDHLYRAFIFYFDKDKSGYITMEELHALKRYNMGDEKTIKEIIAEVTDHGRINYEFAAMMRKGNPDLITNRRRK\*

>GSVIVG01022524001 Org\_Vvinifera peptide: GSVIVT01022524001 (1 of 1) PTHR24349:SF81 - CALCIUM-DEPENDENT  
PROTEIN KINASE 20 (PAC:17831346)

MGNCTCVGNLAANGFLQSVSAVWRTRPPEDMLPPNADGSSSGDNAGSDGAKGSDPPMPKAEKSDGNSGKQKQKTHMKRLSSAGLQIDSVLQRNTENLK  
EIYSLGRKLGQGGFTTYLVCVEKANGKEFACKSIKRRKLTREDVEDVRREIQIMHHLAGHPNIVSIVGAFEDAVAVHVMELCVGGELFDRIIQRGHYT  
ERKAADLARVIVGVVEACHSLGVMHRDLKPENFLFINQDEDSPLKTIIDFGLSMFFRPGEIFTEVVGSPYYVAPEVLRKHYGPECVWSAGVIYIYILLSGV  
PPFWDETEQGFIFEQVLKGDLDVSEFPWPSISDSAKDLVRKMLVRDPKRLTAHEVLCHPWVQVNGVAPDKPLDSAVLTRLKQFSAMNKLKKAIRVIAES  
LSEEEIAGLKEMFKMIDVNSGNITLLEELKTGLERVGADLKDSEIIRLMQAAIDNSGTIDYGEFVAAMLHLNLIKEDHLYAAFSYFDKDGSGYITQDE  
LQQACEQFGLAEIHLLEDVIREVDQNDGRIDYSEFVAMMQDRDFGKKGKIT\*

>GSVIVG01022606001 Org\_Vvinifera peptide: GSVIVT01022606001 (1 of 1) PTHR24349:SF128 - CALCIUM-  
DEPENDENT PROTEIN KINASE 25 (PAC:17831388)

MGNCCVGSMPVEHGLFESISNSIWWTRASDKQKSPPPVQNKPEEVELINPPEVMKITKEETKPTPTPKRPLLMKRLPSAGLEVLDLVKDKTDHLKHEHY  
NLGRKLGHGQGGFTTYLVCVEKETGKEYACKSIKRRKLLTRDDIEDVRREIQIMHHLAGHSNIIISIKGAYEDAVAVHVMELCTGGELFDRIAKRGHYTERK  
AAQLARTIIGVVEACHSLGVMHRDLKPENFLFVNEQEESSLKTIIDFGLSVFFKPGEIFTDVVGSPYYVAPEVLRKCYGPEADVWSGVIIYIYILLSGVPPF  
WAESEQEIFQEVHLGDLNFSDDPWPWHISESAKDLIRRLVRDPKRLTAHEVLCHPWVQVNGVAPDKPLDSAVISRLKQFSAMNKLKKAIRVIAESLSE  
EEIAGLKEMFKMIDTNSGQITFEELKAGLKRFGANLNEAEIYDLMQAADVNSGTIDYGEFIAATFHLNKIEREDHLFAAFSYFDKDGSGYITPDELQK  
ACEEFGMEDVHLEEMIQEVQDNDGRIDYSEFVAMMQGNNDGFKKQNLQNSISFGFRQPLPVY\*

>GSVIVG01023866001 Org\_Vvinifera peptide: GSVIVT01023866001 (1 of 1) PTHR24349:SF83 - CALCIUM-DEPENDENT  
PROTEIN KINASE 6 (PAC:17832178)

MGNTRGSRFRGKYFQGYGQPEEQSTSKRNSDRNSDYSPPSSLNSQQLTANIRDLVSLGRKLGQGGFEDVRREIQIMHHLAGHKNILFDRIIQRGHYSERK  
AAELTKIIVGVVEACHSLGVMHRDLKPENFLLVNKDDDFSLKAIIDFGLSVFFKPGQVFTDVVGSPYYVAPEVLCCKHYGPEADVWTAGVILYILLSGVPPF  
WAETQQGIFDAVLKGFIDFESEPWLISDSAKDLIRKMLCSRPADRLTAHEVLCHPWICENGVA PDRSLDPAVLVSRKQFSAMNKLKKAIRVIAESLSE  
EEIAGLREMFKAMDTSAGAITFDELKAGLRRYGSTLKESEIRDLMDAADVNSGTIDYGEFIAATVHLNKLREEHVLAAFQYFDKDGSGYITVDELQK  
ACAENMTDVFLEDIKEVDQNDGRIDYSEFVAMMQGNNDGFKKQNLQNSISFGFRQPLPVY\*

>GSVIVG01025249001 Org\_Vvinifera peptide: GSVIVT01025249001 (1 of 3) PTHR24349:SF126 - CALCIUM-  
DEPENDENT PROTEIN KINASE 32 (PAC:17833278)

MGNCCASPGEKENPYLIDYNVLHGSVSRNRGPVLKDPDTRDISLKYELGEMRGEFGVTYMCTEKSTNEKYACKSIKRRKRLTAVDIEDVRREVQIMK  
RLPMHFNIVSLKDTFEDENAVHIVMELCEGELFDRIIVSRGHYTERAAAGVMRTIVEVQICHKHGMVHRDLKPENFLFANKKEAAPLKIIDFGLSVDFK  
HGERFSEIVGSPYYMAPEVLKHNYPGEIDIWSAGVILYILLCGIPFFWAEETEQGVQAIRAVVDFKRDWPVKVSDKAKELVKKMLDPPDKRRLTAQEV  
DHPWLQDAKSVPNVSLGESVKARLQFSMMNKLKKAQVMAEHLSMEEVAGIKEAFKTMIDINNRGQINLDELRSGLQKLGQPIPDSDLQILMEAADLDG  
DGTLYAEFVAVSIHKKITNEEHLHKAFAFFDQNSQSYIEIEELQNALADELSTNSEEVINAIMHDVDTDKDGRISYEEFAAMMKAGTDWRKASRQYSR  
ERFNTLSLKLTRDGDQK\*

>GSVIVG01033306001 Org\_Vvinifera peptide: GSVIVT01033306001 (1 of 3) PTHR24349:SF126 - CALCIUM-  
DEPENDENT PROTEIN KINASE 32 (PAC:17839046)

MELCEGELFDRIIVARGHYTERAAAAVTKTIVEVQMCCHKHGMVHRDLKPENFLFANKKETAPLKAIDFGLSVFFKPGERFTEIVGSPYYMAPEVLKRN  
GPEVDVWSAGVILYILLCGVPPFWAETEQGVQAIRSVLDFKRDWPVKVSENAKDLVKKMLDPPDKRRLSAQEVLDHPWLQNAKAPNVSLGETVRARL  
KQFSMMNKLKKAIRVIAEHLVSEEVAGIKEGFQMLDGTGNKGINMDELVRVGLQKLGHQIPEQDLQILMEAGDVGDLGHLDYGEFVAISVHLRKMGNDDH  
LLKAFEFFDQNSGYIEIEELRDALAGELESNSEEVINAIHVDVTDKDRISYDEFAAMMKAGTDWRKASRQYSRERFNTLSLKLIRDGSLVLRP\*

>GSVIVG01034489001 Org\_Vvinifera peptide: GSVIVT01034489001 (1 of 1) PTHR24349//PTHR24349:SF117 -  
SERINE/THREONINE-PROTEIN KINASE // SUBFAMILY NOT NAMED (PAC:17839939)

MHRDLKPENFLFESTDEDAKDKATDFGLSVFYKPGEVFFEVVGSPPYYVAPEVLRKHYGHEVDVWSAGVILYILLSGVPPFWAENDTGIFKEILKGLKDFK  
SDPWPSSISESAKDLIKKMLEMDPKKRISAEVLCHPWIVDDRVAPDKPLDSAVLSRLKQFSAMNKLKKAIRVIAERLSEEEIIGLKELFKMIDTNSGT  
ITFEELKEGLRKGSELMESEIKTLMDAADIDNSGTIDYGEFLAATLHLNKMEREENLIAAFSFFDKDGSGYITIDELQQAACREFLGDAHLDEMIREID  
QDNDGRIDYGEFTAMMRKGDGGIGSRTMRNLFNLADAFGINDTT\*

>GSVIVG01037295001 Org\_Vvinifera peptide: GSVIVT01037295001 (1 of 1) PTHR24349:SF131 - CALCIUM-  
DEPENDENT PROTEIN KINASE 17-RELATED (PAC:17841971)

MGNCCSQGNTNDGPANDKGETIPEPTTNPETAAPESAAQNKPAARKELGRGQFGVTHLCTSKATGEQFACKTIAKRRKLVNKEDIEDVRREVQIMHHLTG  
QPNIVELKAYEDKQSVHLMELCAGGELFDRIISKGHYTERGAASLLRTIVQIVHTCHSMGVVHRDLKPENFLLNKNDENAPLKRATDFGLSVFFKQGEV



FRDIVGSAYYIAPEVLKRRYGPEVDIWSVGVMLYILLCGVPPFFWAESEHGIFNAILRGHIDFTSDPWPTISSGAKDLVRKMLTSDPKQRITAFQVLNHPW  
IKEDGEAPDPLDNAVFERFKQFRAMNFKKVALRVIAGCLSEEEIMGLKQMFKGMDDTNSGTITLLEELKQGLSKQGTKLSEYEVKQLEAADADNGTI  
DYDEFITATMHLNRMDKEDHLYTAFQYFDKDNSGYITTEELEQALHEFGMHGDRDIKEILNEVDGNDGRINRYDEFVTTMMRKGNEPKNPKRRRDVVFV\*  
>GSVIVG01037652001 Org\_Vvinifera peptide: GSVIVT01037652001 (1 of 1) PF07714//PF13499//PF13833 -  
Protein tyrosine kinase (Pkinase\_Tyr) // EF-hand domain pair (EF-hand\_7) // EF-hand domain pair (EF-  
hand\_8) (PAC:17842193)  
MGVMHRDLKPENFLLSSKGENALLKATDFGLSVFIEEGKYVRDIVGSAYYVAPEVLRRLRYGKEIDIWSAGVILYILLSGVPPFFWAEETEKGIFDAILQGHI  
DFETSFPWPSISSAKDLVRKMLTQDPQKRITSAQVLEHPWIKEDGEASDKPIDSAVLSRMKQFRAMNKLKLLKLVIAENLSEEEIQGLKAMFTNMDTDK  
SGTITTYEELKSGLARLGSKLTEAEVQQLMEAADVDGNGTIDYIEFITATVNRHKLERDEHLFKAFQYFDKDSGFIITRDELKAAMKEHGMGDDDTIAEII  
SEVTDNDKINYGFEFCSMRGGTQQGLKVF\*  
>LOC\_Os01g43410 Org\_Osativa peptide: LOC\_Os01g43410.1 CAMK\_CAMK\_like.9 - CAMK includes  
calcium/calmodulin depeudent protein kinases, expressed (PAC:33123266)  
MGNRTSRHHRAAPEQPPQPKPKPQQQQQWWRPQQPTPPPAAPDAAMGRVLRPMEDVRATYTFGRELGRGQFGVTYLVTHKATGKRFACKSIATR  
KLAHRDIEDVRRVQIMHHLTGHRNIVELRGAYEDRHSVNLIMELCEGGELFDRIIARGHYSERAAAALCREIVAVVHSCSMGTVFHRDLKPENFLFLS  
KSEDSPLKATDFGLSVFFKPGHEHFDLVGSAYYVAPEVLRKRYGAEADIWSAGVILYILLSGVPPFFWAESEEDGIFDAVLRGHIDFSSSEPWPSISNGAKDL  
VKMLRQDPKERLTSAEILNHPWIREDGEAPDKPLDITVISRMKQFRAMNKLKLVKVAENLSDDEEITGLKEMFRSLDITNSGTITLLEELRSLPKLG  
TKISESEIRQLMEAADVDGNGTIDYAEFISATMHNRLKEDHILKAFYFDKDHSGYITVDELEELKKYDMGDDKTIKEIIAEVDTDHDGRINRYQEFV  
AMRNNNPEIAPNRRRMF\*  
>LOC\_Os01g59360 Org\_Osativa peptide: LOC\_Os01g59360.1 CAMK\_CAMK\_like.10 - CAMK includes  
calcium/calmodulin depeudent protein kinases, expressed (PAC:33119807)  
MGNCPCGSDAEPASSDASTGNGSSSFKAGASPSAPAKNPPAPIGPVLGRPMEDVRSIYTIGKELGRGQFGVTSLCTHKATGQKFACTI AKRKLSTK  
EDVEDVRRVQIMYHLAQPNVVELKAGAYEDKQSVHLVMELCAGGELFDRIIAGHYTERAAAALRTIIVEI IHTCHSLGVIHRDLKPENFLLSKDEDA  
PLKATDFGLSVFFKQGEVFKDIVGSAYYIAPEVLRKRSYGEADIWSVGVILYILLCGVPPFFWAESEHGIFNSILRGQVDFTPSDWPRISASAKDLVRKML  
NSDPKKRISAYEVLNHPWIKEDGEAPDPLDNAVNRKQFRAMNQFKKALRVIAGCLSEEEIRGLKEMFKSMDSNSGTITVDELKGLSKQGTKLTE  
AEVQQLMEAADADNGTIDYDEFITATMHNMRMDREHLYTAFQYFDKDNSGCISKEELEQALREKGLLDGRDIKDIIEVDADNDGRI DYSEFAAMRK  
GNPEANPKRRRDVVI\*  
>LOC\_Os01g61590 Org\_Osativa peptide: LOC\_Os01g61590.1 CAMK\_CAMK\_like.1 - CAMK includes  
calcium/calmodulin depeudent protein kinases, expressed (PAC:33126149)  
MGNCCRSAPAAAAREDVKSSHPFASAGKKKPHQARNGVGGGGGGGGGGGGGAGQKRLPVLGEEGCELIIGIDDKYALDRELGRGEFGVTYLCMDRDTK  
ELLACKSISKRKLRTAVDVEDVRRVIAIMRHLPKSASIVSLREACEDEGAVHLVMELCAGGELFDRIIARGHYTERAAAANVTRTIVEVYQLCHRHGVIIHR  
DLKPENFLFANKKENSPLKIDFGLSIFFFKPGKEFSEIVGSPYYMAPEVLRKRYGPEIDIWSAGVILYILLCGVPPFFWAEETQGVAAQAILRGNIDFKREP  
WPNVSENADLVRRLMPEPDKLRLTAKQVLEHPWLQNAKAPNVPLGDIKVSRLKQFSRMNRFRALRVIADHLSAEVEEDIKEMFKAMDTDNDGIVSY  
EELKSGIAKFGSHLAESEVQMLIEAVDVTNGKDALDYGEFLAVSLHLQRMANDEHLRRAFLFFDKDNGYIEPEELREALVDDGAGDSMEVVDIILQEVDT  
KDKGKISYDEFVAMMKTGTDRKASRHSYGRFNSLMSKLIKDGSVKLVNE\*  
>LOC\_Os02g46090 Org\_Osativa peptide: LOC\_Os02g46090.1 CAMK\_CAMK\_like.15 - CAMK includes  
calcium/calmodulin depeudent protein kinases, expressed (PAC:33139849)  
MGNTCGVTLRSKYFASFRGASQRHDEAGYAPVATSAAAAAADEPAGKKAAPRGSAAAADAPHAASMKRGAPAPAEALTANVLGHPTPSLSEHYALGRKLGO  
GQFGTTYLCTDLATGVYACKSIAKRKLITKEDVEDVRRVQIMHHLGHRNVVAIKGAYEDPQYVHIVMELCAGGELFDRIIERGQFSERKAAELTRII  
VGVIEACHSLGVIHRDLKPENFLLANKDDDSLKKAIDFGLSVFFKPGQVFTDVVGSPPYYVAPEVLRKCYGPEADVWTAGVILYILLSGVPPFFWAEETQGGI  
FDAVLKGVIDFSDPWPVIVSDSAKDLIRRLNRPKRLTAHEVLCHPWICDHGVAPDRPLDPAVLSRIKQFSAMNKLKMLRVI AESLSEEEIAGLKE  
MFKAMDTDNSGAIITYDELKEMGRKYGSTLTKDTEIRDLMEAADVDNSGTIDYIEFIAATLHLNKLREHEHLVAAFYFDKDGSGYITVDELQQACKEHNMP  
DAFLDDVIKEADQNDGRIDYGEFVAMMKTGNMGVGRRTMRNSLNSMR\*  
>LOC\_Os02g58520 Org\_Osativa peptide: LOC\_Os02g58520.1 CAMK\_CAMK\_like.16 - CAMK includes  
calcium/calmodulin depeudent protein kinases, expressed (PAC:33136325)  
MGNYSCGASSTSSPTSPSLVDYCYHRYPSSCSSTSTATSSGGRMPISRSHQRLSSPTAVLGHETPALREVYTVGRKLGQGGQFGTTYLCTQVSTGAEY  
ACKSIAKRKLLSPEDVEDVRRVQIMHHLGAGHSVVTIQAGAYEDNLYVHIVMELCEGGELFDRIIVERGYFSERKAAEITRIVGVVEACHSLGMHRDLK  
PENFLLKESSSSSSLKKAIDFGLSVFFKPGQVFSDDVGSPPYYVAPEVLRKCYGPEADVWTAGVIVYILLSGVPPFFWAEETQGGIFDAVLRGSLDFDSDPWPT  
ISDSAKDLIRRLRSPRERLTAHQVLCWPVCCDGVAPDRPLAPAVLSRLKQFSAMNRLKMLRVIARNLSEEEIAGLKEFKAMDTDASGAIITFDEL  
KEGLRRYGSLNREAEIRDLMDAADVDKSGTIDYDEFIAATVHLNKLREHEHLVAAFYFDKDGSGYITVDELEHACRDHNMADVGDIDDIIREVDQNDGR  
IDYGEFVAMMKGAIIDIGNRLTIGRPTTATSDDPSPTISSSSR\*  
>LOC\_Os03g03660 Org\_Osativa peptide: LOC\_Os03g03660.1 CAMK\_CAMK\_like.17 - CAMK includes  
calcium/calmodulin depeudent protein kinases, expressed (PAC:33128275)  
MGNQCQNGTLGSDYHNRFPREHAVGVYQGD SYLDLKKFDDTWPVNNFKPTAASILRRGLDPTSINVLGRKTADLREHYIIGRKLGGQFGTTYLCTEIN  
TGCEYACKTIPKRKLITKEDVEDVRRVQIMHHLGSHGNVVAIKDVYEDGQAVHIVMELCAGGELFDRIQEKGHYSERKAAELIRIIVSIVAMCHSLGM  
HRDLKPENFLLDKDDDSLKKAIDFGLSVFFKPGQVFTELVGSPPYYVAPEVLRKRYGPESDVWSAGVILYVLLSGVPPFFWAEETQGGIFDAVLKGHIDFQS  
DPWPKISDSAKDLIRKMLSHCPSERLKAHEVLRHPWICENGVAATDQALDPSVISRLKQFSAMNKLKMLRVIARLSEEEIAGLREMFKAVDTKNRGVI  
TFGELREGLRRFGAEFKDTEIGDIMEAAHNDNNVTIHYEEFIAATLPLNKIEREHLVAAFYFDKDGSGYITVVKLQQRACGEHNMEDSLLEEIISEVDQ  
NNDGQIDYAEFVAMMKGQSNVGLGWQTMESLNVHSLCWLFFQRPVLRNRSRHCVTLSMLAFL\*  
>LOC\_Os03g03660 Org\_Osativa peptide: LOC\_Os03g03660.2 CAMK\_CAMK\_like.17 - CAMK includes  
calcium/calmodulin depeudent protein kinases, expressed (PAC:33128278)  
MGNQCQNGTLGSDYHNRFPREHAVGVYQGD SYLDLKKFDDTWPVNNFKPTAASILRRGLDPTSINVLGRKTADLREHYIIGRKLGGQFGTTYLCTEIN  
TGCEYACKTIPKRKLITKEDVEDVRRVQIMHHLGSHGNVVAIKDVYEDGQAVHIVMELCAGGELFDRIQEKGHYSERKAAELIRIIVSIVAMCHSLGM  
HRDLKPENFLLDKDDDSLKKAIDFGLSVFFKPGQVFTELVGSPPYYVAPEVLRKRYGPESDVWSAGVILYVLLSGVPPFFWAEETQGGIFDAVLKGHIDFQS  
DPWPKISDSAKDLIRKMLSHCPSERLKAHEVLRHPWICENGVAATDQALDPSVISRLKQFSAMNKLKMLRVIARLSEEEIAGLREMFKAVDTKNRGVI  
TFGELREGLRRFGAEFKDTEIGDIMEAAHNDNNVTIHYEEFIAATLPLNKIEREHLVAAFYFDKDGSGYITVVKLQQRACGEHNMEDSLLEEIISEVDQ

NNDGQIDYAEFVAMMQGSNVGLGWQTMESLNLVALRDAPQVH\*

>LOC\_Os03g03660 Org\_Osativa peptide: LOC\_Os03g03660.3 CAMK\_CAMK\_like.17 - CAMK includes calcium/calmodulin depeudent protein kinases, expressed (PAC:33128276)

MGNQCQNGTLGSDYHNRFPREHAVGYVQGD SYLDLKKFDDTWPVNNFKPTAASILRRGLDPTSINVLGRKTADLREHYIIGRKLGGQGFQGTYYLCTEIN TGCEYACKTIPKRKLITKEDVEDVRREIQIMHHLGSHKNNVAIKDVEDGQAVHIVMELCAGGELFDRIQEKGHYSEKAAELIRIIVSIVAMCHSLGVM HRDLKPENFLLLDKDDLSIKAIIDFGLSVFFKPGQVFTLVGSPYYVAPEVLHVKRYGPESDVWSAGVILYVLLSGVPPFWAETQQGIFDAVLKGHIDFQS DPWPKISDSAKDLIRKMLSHCPSERLKAHEVLRHPWICENGVATDQALDPSVISRLKQFSAMNKLKLLALRVIAERLSEEEIAGLREMFKAVDTKNRGVI TFGELREGLRRFGAEFKDTEIGDIMEAAHNDNNVTIHYEEFIAATLPLNKIEREEHLLAAFTYFDKDGSGYITVDKLRACGEHNMEDSLLEEIIIEVDQ NNDGQIDYAEFVAMMQGSNVGLGWQTMESLNLVALRDAPQVH\*

>LOC\_Os03g03660 Org\_Osativa peptide: LOC\_Os03g03660.4 CAMK\_CAMK\_like.17 - CAMK includes calcium/calmodulin depeudent protein kinases, expressed (PAC:33128277)

MGNQCQNGTLGSDYHNRFPREHAVGYVQGD SYLDLKKFDDTWPVNNFKPTAASILRRGLDPTSINVLGRKTADLREHYIIGRKLGGQGFQGTYYLCTEIN TGCEYACKTIPKRKLITKEDVEDVRREIQIMHHLGSHKNNVAIKDVEDGQAVHIVMELCAGGELFDRIQEKGHYSEKAAELIRIIVSIVAMCHSLGVM HRDLKPENFLLLDKDDLSIKAIIDFGLSVFFKPGQVFTLVGSPYYVAPEVLHVKRYGPESDVWSAGVILYVLLSGVPPFWAETQQGIFDAVLKGHIDFQS DPWPKISDSAKDLIRKMLSHCPSERLKAHEVLRHPWICENGVATDQALDPSVISRLKQFSAMNKLKLLALRVIAERLSEEEIAGLREMFKAVDTKNRGVI TFGELREGLRRFGAEFKDTEIGDIMEAAHNDNNVTIHYEEFIAATLPLNKIEREEHLLAAFTYFDKDGSGYITVDKLRACGEHNMEDSLLEEIIIEVDQ NNDGQIDYAEFVAMMQGSNVGLGWQTMESLNLVALRDAPQVH\*

>LOC\_Os03g48270 Org\_Osativa peptide: LOC\_Os03g48270.1 CAMK\_CAMK\_like.21 - CAMK includes calcium/calmodulin depeudent protein kinases, expressed (PAC:33127982)

MGNCCVAPATTEDEVGAPPRDHHAAKSPAPSATTTTATRQRHGQEPKPKPKPRARAKPNPYDAPPRVLPARGGAAASAVRVLEGVVPHPRLRVTDK YQLGRELGRGEFGVTHLATDRATERLACKSIPKRRLRTAVDADVVRREIVAIMASLPDHPALVRLRAAYEDADAVHLVMECDGGELFDRIVARGRYTER AAAAAARTVAEVRACHAHGVMHRDLKPENFLYAGKAEDAQLKAIIDFGLSVFFRPGERFREVIVGSPYYMAPEVLRDYGPEVDIWSAGVILYIILCGVPP FWAETEQQVARAILRGAADFREPWRISRAAKSLVRQMLDVPDRRRPTAQVLDHPWLHHAARAFNPVPLGDVVRARLQKFSMLNRLKKKAMRVIAEHL SVEEVEVIKDMFALMDTDNNGRVTLQELKDGTLTKVGSKLAEPEMELLMEAADVDGNGYLDYGEFVAVTIHLQRLSNDNHLRTAFLFFDKDGSGYIDRAELA DALADDSGHADDAVLDHILREVDTDKGRISYEEFVAMMKSGTDWRKASRQYSRERFKTLNSLIKDGSIITMAR\*

>LOC\_Os03g57450 Org\_Osativa peptide: LOC\_Os03g57450.1 CAMK\_CAMK\_like.2 - CAMK includes calcium/calmodulin depeudent protein kinases, expressed (PAC:33131946)

MGNCTCVGPSISKNGFFQSVSTVLWKRQDGDALPGANGAPDGGGQGRLLPAPPPTSDAPLAVQNKPEHVKIVSTTDTASAEQDASKSSAGSDSGEAA RPRRPVPPVKRVSSAGLLVGSVLKRTESLKDYSLGRKLGGQGFQGTYYLCTEINVERATGKEFACKSILKRLKVTDDDVEDVRREIQIMYHLGHPNVISIRGA YEDAVAVHLMELCAGGELFDRIQVQGHYTERKAAELARVIVGVVEVCHSMGMHRDLKPENFLFADQTEEAALKTIDFGLSIFFRPGQVFTDVGSPYY VAPEVLKKKYQEAADVWSAGVILYIILCGVPPFWAENEQGFEEVHLGRDLDFQSEFPWPSISEGAKDLVRRMLVRDPKRLTAHEVLRHPVQVGLAPDK PLDSAVLSRMKQFSAMNKLKMLARVIAENLSEDEIAGLKEMFKMIDTNSGQITFEELKVLKKGANLQESEIYALMQAADVDNSGTIDYGEFIAATL HMNKIEREDHLFAAFQYFDKDGSGYITADELQACEFGLGDVQLEEMIREVDEDDNDGRIDYNEFVAMMQKPTMGLPAKKSGLQNSFSGIFREALRMS\*

>LOC\_Os03g57510 Org\_Osativa peptide: LOC\_Os03g57510.1 CAMK\_CAMK\_like.23 - CAMK includes calcium/calmodulin depeudent protein kinases, expressed (PAC:33131565)

MGNCCVGPSAAGQNGFFANVALWRPRPADAAAPPALPPSSAPSDQAPEVPTIPPSEHSSHHSSRSTDPSTPTSAEQPANKAAPKVKRVQVWSAGLLADSVL KRDVNTARLKDLYTIGKKLGGQGFQGTYYLCTEINVEKATGREFACKSIAKRKLLTQEDVEDVRREIQIMHHLGHPANVSVIVGAYEDAVAVQLVMECDGGELF DRIIQRGHYSEKAAQALARVIVGVIEACHSLGVMHRDLKPENFLFIHQKEDSPLKAIIDFGLSIFFKPGETFTDVGSPYYVAPEVLMKHYGREVDVWSAG VYIYIILSGVPPFWDESEQGFIFEQVLKGDLDLFSSEFPWPNISESAKDLVRKMLIRDPKRLTAHEALCHPWVVDGVPADPKPLDSAVLSRLKQFSAMNKLK KMLARVIAESLSEEEIAGLKEMFKMLDITNSGHIITLEELKTGLQVRGANLMDSEIDALMEAAIDNSGTIDYGEFIAATLHINKVEKEDKLFAAFYSYFDK DSGYITQDELQKACEEFGIGDTRIEDIIGDIDQDNDGRIDYNEFVEMMQKGNAMGKMGHSTGNFGLGEALKLR\*

>LOC\_Os03g59390 Org\_Osativa peptide: LOC\_Os03g59390.1 CAMK\_CAMK\_like.24 - CAMK includes calcium/calmodulin depeudent protein kinases, expressed (PAC:33133053)

MGNCCGTPATAEEGKRRRRKQKKNPFTVAYNRAPSSAGAAAGRPGLMVLDPDTPGRDLGARYELGGELGRGEFGITYLCTEAEFGDRYACKSISKRKL RTPVDVEDVRREVEIMRHMPSHPNIVSLRAAYEEDNVHLVMECEGGELFDRIVARGHYTERAAAAVTRTIVEVVMQCHRHGVMHRDLKPENFLYANKK DSSPLKAIIDFGLSVFFRPGERFTEIVGSPYYMAPEVLKRYGPEVDVWSAGVILYIILCGVPPFWAETEQQVAQAIIRSVVDFKREPWRVSEPAKDLVK RMLDNPMPMTRLTAEQVLEHPWLHDSKMPDIPLDGAVRARLQQFAAMNKLKALKVIAEHLSEAAEADIKDMFDKMDVSKNGQLTFEDFKAGIRKLGNO MPDSDLKILMDAADIDKNGIILDYQEFVAVSIHVRKIGNDEHIQKAFSYFDQNKSGYIEIEELREALVDEIDGNDEDIINSIIRDVDTDKDGKISYDEFAV MMKAGTDWRKASRQYSRQFSNLKQLKDGSIISDDTQ\*

>LOC\_Os04g47300 Org\_Osativa peptide: LOC\_Os04g47300.1 CAMK\_CAMK\_like.26 - CAMK includes calcium/calmodulin depeudent protein kinases, expressed (PAC:33109983)

MGNCFTKTYEIPITSGTMRRPASTAERSKARGGDEPGTWRRPSPFRHGAPPHPPTGSSAAGALSRRASGGGEMGPVLQRAMVSVRSLYQLDRKLGSG QFGTYYLCTERATGNRYACKSVSKRKLVRRTDVEDVRREITILQHLGSPQNIAEFRGAYEDNDVHVLVMEFCGGELFDRIITAKGSYSERQAAAACRDIL TVVHVCHFMGVIHRDLKPENFLLASADDDAPLKAIDFGLSVFIEEGKVYKDIVGSAYYVAPEVLQRNYGKEADIWSAGVILYIILCGTTPFWAETEKGIF DAILVNQVDFSTSPWPSISESAKDLIRQMLHRDPQKRITASQALEHRWLKKEGASDRPIDSAVLSRMKQFKAMNKLKQLALKVAENLSPEEIKGLKQMF NNMDTDRSGTITVEELKVLGTLKLSRISEAEVQKLMEAVDVKSGSIDYSEFLTAMINKHKLKEEDLLRAFQHFQDKDNGSYITRDELEQAMAEYMGDE ANIKQVLDEVDKDKDRIEYEFVEMMRKGIQT\*

>LOC\_Os04g49510 Org\_Osativa peptide: LOC\_Os04g49510.1 CAMK\_CAMK\_like.27 - CAMK includes calcium/calmodulin depeudent protein kinases, expressed (PAC:33112648)

MGNACGSLRSKYLKQFQASQRHDTDDNNNAADSPKKPSRPPAAAKTDDHPVSASAPAAAMRRGQAPADLGSVLGHPTPNLRDLYAMGRKLGGQGF TTYLCTELSTGVYACKSISKRKLITKEDIEDVRREIQIMHHLGSHKNNVAIKGAYEDQLYVHIVMELCAGGELFDRIIQRGHYSEKAAELTRIIVGVV EACHSLGVMHRDLKPENFLLANKDDLSLKAIDFGLSVFFKPGQVFTDVGSPYYVAPEVLLKHYGPEADVWTAGVILYIILSGVPPFWAETQQGIFDAV LKGFIDFSDPWPVISESAKDLITKMLNRPKRLTAHEVLRHWPWRDHPAVLSRIKQFSAMNKLKMLARVIAESLSEEEIAGLKEMFQT MDADNSGAIYDEKLEGLRKYGSLTKDTEIRDLMADAADIDNSGTIDYIEFIAATLHLNKLREEHLLVAAFSYFDKDGSGYITVDELQACKHEHMPDAFL DDVINEADQDNDGRIDYGEFVAMMTKGNMGVGRRTMRNSLNISMRDAPGAL\*

>LOC\_Os04g49510 Org\_Osativa peptide: LOC\_Os04g49510.2 CAMK\_CAMK\_like.27 - CAMK includes calcium/calmodulin dependent protein kinases, expressed (PAC:33112649)  
MGNACGGSLRSKYLSFKQASQHRDTHDDNNAAAADSPKPKPSRPPAAAKTDDHPVSASAPAAAMRRGQAPADLGSVGLHPTPNLRDLIYAMGRKLGQGGQFG  
TYYLCTELSTGVYDACKSISKRKLITKEDIEDVRREIQIMHHLGSHKNNVVAIKGAYEDQLYVHIVMELCAGGELFDRIIQRGHYSERKAAELTRIIVGVV  
EACHSLGVMHRDLKPENFLLANKDDDDLSLKAIDFGLSVFFKPGQFTTDDVVGSPYYVAPEVLLKHYGPEADVWTAGVILYILLSGVPPFWAETQQGIFDAV  
LKGFIIDFSDPWPVISESAKDLITKMLNRPKRLTAHEVLCHPWIRDHGAVPDRPLDPAVLSRIKQFSAMNKLKMKALRVIAESLSEEEIAGLKEMFQTM  
MDADNSGAIITYDELKEGLRKYGSTLKDTEIRDLMDAVS\*

>LOC\_Os05g39090 Org\_Osativa peptide: LOC\_Os05g39090.1 CAMK\_CAMK\_like.29 - CAMK includes calcium/calmodulin dependent protein kinases, expressed (PAC:33159975)  
MGNCCSRPAAAARDVKTSHFPASTGGGKKKPHQARNGGGGGGGGGWEKRLSVLGEEGSEVNGGIEEKYALDRELGRGEFGVYTYLMDRCRSRELLA  
CKSISKRKLRTVPDVEDVRREVAIMRHLPRASIVSLREACEDDGAHVLMELCEGGELFDRIIVARGHYTERAAAAVTRTIVEVQLCHRHGVIHRDLKP  
ENFLFANKKENSPLKAIIDFGLSIFFKPGEKFESEIVGSPYYMAPEVLKRYNGPEIDIWSAGVILYILLCGVPPFWAETEQQVAQAAILRGNIDFKREPWPVN  
SDNAKDLVRQMLQDPKRLRLTAKQVLEHTWLQNAKKAAPNVPLGDIVKSRLKQFSRMRNFRKRRALRVIAHLSAEEVEDIKDMFKVMDTNDNGIVSYEELK  
SGIAKFGSHLAESEVQMLIEAVDTNNGRAGLDYGEFLAVSLHLQRMANGEHLRRAFLFFDKDNGYIEPEELQEALVEDGATDIMEVVKDILQEVDTDKDG  
KISYEEFVAMMKTGTDRWKASRHSRGRFNSLSIRLIKDGSVKLGNE\*

>LOC\_Os05g41270 Org\_Osativa peptide: LOC\_Os05g41270.1 CAMK\_CAMK\_like.4 - CAMK includes calcium/calmodulin dependent protein kinases, expressed (PAC:33156904)  
MGNCCPPGSSSEPDPPASSGSRPAGSAGAAASPATISPSAAPAPAKPPAPIGPVLGRPMEDVKSITYTVGKELGRGQFGVTSCLTHKATGQRFACKTIS  
KRKLSSTKEDVEDVRREVIQIMYHLAQPGVVELKGYEDKHAVHLMELCAGGELFDRIIAKGHYTEHAASSLLRTIVEIHTCHSMGVIHRDLKPENFLL  
LSKDEHAPLKATDFGLSVFFKEGEVFRDIVGSAYYIAPEVLKRSYGPEADIWSIGVMLYILLCGVPPFWAEESEHGIFNSILRGHVDFSSEFPWSRISHGAK  
DLVRRLHSDPKQRIISAYDVLNHPWIKEDGEAPDTPLDNAVLGRKQFRAMNQFKKAALRVIAAGCLSEEEIRGLKEMFKMSDSDNSGTITVDELKGLAK  
KGTKLTEAEVQQLMEAADADNGTIDYEEFITATMHHMNRMDREEHLYTAFQYFDKNSGYITIEELEQALREKGLMDGREIKDIISEVDADNDGRINYTE  
FVAMMRKGDPEANPKRRDVLV\*

>LOC\_Os05g50810 Org\_Osativa peptide: LOC\_Os05g50810.1 CAMK\_CAMK\_like.5 - CAMK includes calcium/calmodulin dependent protein kinases, expressed (PAC:33157415)  
MVSSSSSPQSKPKPKPLSPPMGARASRHRQSPDQSQSQSPSPHKKHHHHHQTTRAPKPKPKQPPPPQPPRSQPPPPPRHQPPQAPQAAAEDGVGR  
VLGRPMEDVRATYTFGRELGRGQFGVYTYLATHKPTGRRYACKSIAARKLARPDLDLDDVRREVIHMHHLTGHRNIVELRGAYEDRHSVNLVLMELCEGGELF  
DRIIARGHYSERAAAAALCREIVSVVHSHSMGMVHRDLKPENFLFLNKREDSPLKATDFGLSVFFKPGEQFRDLVGSAYYVAPEVLKRLYGAEADIWSAG  
VILYILLSGVPPFWAENEDGIFDAVLQGHIDFSSEFPWISSGAKDLVKRMLRQDPKERLTAEEILNHPWIREDGEAPDKPLDITVISMKQFRAMNKLK  
KVALKVAENLSEEEIVGLKEMFKSLDNDNSGTITLEELRAGLPKLGTKISESELQLEMAADVDGNGSIDYVEFISATMHHMNRLEKEDHIYKAFEFYFDK  
DHSGFITVDELEALTKYDMGDEATIKEIIAEVDTDHDGRINRYQEFVAMMKNNSPEIVPNRRRMF\*

>LOC\_Os05g50810 Org\_Osativa peptide: LOC\_Os05g50810.2 CAMK\_CAMK\_like.5 - CAMK includes calcium/calmodulin dependent protein kinases, expressed (PAC:33157416)  
MVSSSSSPQSKPKPKPLSPPMGARASRHRQSPDQSQSQSPSPHKKHHHHHQTTRAPKPKPKQPPPPQPPRSQPPPPPRHQPPQAPQAAAEDGVGR  
VLGRPMEDVRATYTFGRELGRGQFGVYTYLATHKPTGRRYACKSIAARKLARPDLDLDDVRREVIHMHHLTGHRNIVELRGAYEDRHSVNLVLMELCEGGELF  
DRIIARGHYSERAAAAALCREIVSVVHSHSMGMVHRDLKPENFLFLNKREDSPLKATDFGLSVFFKPGEQFRDLVGSAYYVAPEVLKRLYGAEADIWSAG  
VILYILLSGVPPFWAENEDGIFDAVLQGHIDFSSEFPWISSGAKDLVKRMLRQDPKERLTAEEILNHPWIREDGEAPDKPLDITVISMKQFRAMNKLK  
KVALKVAENLSEEEIVGLKEMFKSLDNDNSGTITLEELRAGLPKLGTKISESELQLEMAADVDGNGSIDYVEFISATMHHMNRLEKEDHIYKAFEFYFDK  
DHSGFITVDELEALTKYDMGDEATIKEIIAEVDTDHN\*

>LOC\_Os07g06740 Org\_Osativa peptide: LOC\_Os07g06740.1 CAMK\_CAMK\_like.31 - CAMK includes calcium/calmodulin dependent protein kinases, expressed (PAC:33117996)  
MGNTCVGPSSAADRHGFFHSVSLAVLWRPGRGAEPSPQPPGYPPRESSHSVTSSTAPERVTIADSDLSSTPNKGGNKPKVRRVQSAGLLADSVLKRDS  
RLKDLTYLTKGLKGGQFGTYYQCVKATGKVLACKSIAKRLVSEEDVEDVRREIQIMHHLGHPVSVSVIGAYEDAVAVHLMELCAGGELFDRIIVQRG  
HYSEKAAAQLARVIGVVEACHSLGVMHRDLKPENFLFVNHKEDSPLKIDFGLSIFFKPGENYSDVVGSPYYVAPEVLMKHYGREVDVWSAGVIYIILL  
SGVPPFWDESEQGFIFEKVLKGLDFSSDPWPAISDSAKDLVRKMLNRPDRKRLTAHEALCHPWVCDGVAPDKPLDSAVLTRLKQFSAMNKLKMKALRV  
AENLSEDEIAGLREMFKMLDNDNSGQITLEELKTLGRRVGANLKDSEITLMEAADIDNSGSIDYGEFIAATMHLNKVEREDNLFAAFSYFDKSSGYIT  
QDELQKACEEFGIGDAHLEDIKIDIDQDNDGRIDYNEFVTMMQKGNPNLGGKGGQGLSFLGREALKLG\*

>LOC\_Os07g06740 Org\_Osativa peptide: LOC\_Os07g06740.2 CAMK\_CAMK\_like.31 - CAMK includes calcium/calmodulin dependent protein kinases, expressed (PAC:33117995)  
MGNTCVGPSSAADRHGFFHSVSLAVLWRPGRGAEPSPQPPGYPPRESSHSVTSSTAPERVTIADSDLSSTPNKGGNKPKVRRVQSAGLLADSVLKRDS  
RLKDLTYLTKGLKGGQFGTYYQCVKATGKVLACKSIAKRLVSEEDVEDVRREIQIMHHLGHPVSVSVIGAYEDAVAVHLMELCAGGELFDRIIVQRG  
HYSEKAAAQLARVIGVVEACHSLGVMHRDLKPENFLFVNHKEDSPLKIDFGLSIFFKPGENYSDVVGSPYYVAPEVLMKHYGREVDVWSAGVIYIILL  
SGVPPFWDESEQGFIFEKVLKGLDFSSDPWPAISDSAKDLVRKMLNRPDRKRLTAHEALCHPWVCDGVAPDKPLDSAVLTRLKQFSAMNKLKMKALRV  
AENLSEDEIAGLREMFKMLDNDNSGQITLEELKTLGRRVGANLKDSEITLMEAADIDNSGSIDYGEFIAATMHLNKVEREDNLFAAFSYFDKSSGYIT  
QDELQKACEEFGIGDAHLEDIKIDIDQDNDGRIDYNEFVTMMQKGNPNLGGKGGQGLSFLGREALKLG\*

>LOC\_Os07g33110 Org\_Osativa peptide: LOC\_Os07g33110.1 CAMK\_CAMK\_like.33 - CAMK includes calcium/calmodulin dependent protein kinases, expressed (PAC:33116748)  
MGSCSRATSPDSGRGGANGYGSYHQTKPAQTTSPYNHPQPPPPAEVRYTPSAMNPPVPPVAPPKPTPDTILGKPYDDVRSVYSLGKELGRGQFGVY  
LCTEIASGKQYACKSISKRKLVSKADKEDIRREIQIMQHLSGQQNIVEFRGAYEDKSNVHVMELCAGGELFDRIIAKGHYSERAAATICRAVVNVVNIC  
HFMGMVHRDLKPENFLLATKEENAMKATDFGLSVFIEEGKMYRDIIVGSAYYVAPEVLRNRYGKEIDVWSAGVILYILLSGVPPFWAETEKGIFDAILQG  
EIDFESQPWPSISESAKDLVRKMLTQDPKKRITSAQVLQHPWLRDGEASDKPIDSAVLSRMKQFRAMNKLKMKALKVIAASNLEEEIKGLKQMFNTMDTD  
NSGTITYEELKAGLAKLGLSEAEVQQLMEAADVDGNGSIDYVEFITATMHRHKLERDEHLFAFQYFDKNSGFIITRDELESALIEHEMGDTSTIKDI  
ISEVDTDNDGRINYEFCAMMRGGMQPPMLK\*

>LOC\_Os07g33110 Org\_Osativa peptide: LOC\_Os07g33110.2 CAMK\_CAMK\_like.33 - CAMK includes calcium/calmodulin dependent protein kinases, expressed (PAC:33116745)



HLSEHPNVVIRGAYEDALFVHIVMELCAGGELFDRIIVAKGHYTERAAQLIRTIVAVVEGCHSLGVMHRDLKPENFLFASAAEDAPLKATDFGLSMFYK  
PGDKFSDVVGSPYYVAPEVLQKCYGPESDVWSAGVILYILLCGVPPFWAETEAGIFRQILRGKLDSESEPWPSISDSAKDLVRNMLCRDPTKRLTAHEVL  
CHPWIVDDAVAPDKPIDSAVLSRLKHFSAAMNKLKMLRVAIESLSEEEIIGLKEFLKMIIDTDDSGTITFDELKEGLKRVGSELTEHEIQALMEADIDN  
SGTIDYGEFIAATLHMNKLREENLVSAFSAFFDKDGSGFITIDELSQACREFGLDLDLHLEDMIKDVQDNDGQIDYSEFTAMMRKGNAGGAGRTRMNSL  
QLNLGEILNPSNS\*

>LOC\_Os12g03970 Org\_Osativa peptide: LOC\_Os12g03970.1 CAMK\_CAMK\_like.44 - CAMK includes  
calcium/calmodulin dependent protein kinases, expressed (PAC:33153859)  
MGQCCCTGGGKAVAGDEAEPGTSKAAAPPSSRGTSKNGSAAKAAATEAAAAAASSSKKAPGPIGEVLERPMEEVTRTYSIGKELGRGQFGVTHLC  
THKATGEKLAACKTIAKRKLANKEDVDVREEVQIMHHLGSGPNIVDLRGAYEDKHNHVLVMEELCAGGELFDRIIARGHYTERAAALLRAIVGIVHTCHS  
MGVIHRDLKPENFLLSKGGDAPLKATDFGLSVFFKEGEVFRDIVGSAYIAPEVLKRKYGPEADIWSIGVMYIIFLAGVPPFWAASENAIFAAIIRGQI  
DLASEFPWKISSGAKDLVRKMLNINPKERLTAQVNLNHPWIKEDGADPVDLNVVLRNLRKQFRAMNQFKKAALRIIAGCLSEEEIKGLKEMFKNIDKDN  
SGTITLLEELKNGLAQGTKFSNEIEQLMEAADADNGIIDYEEFVATVHMNMKDREEHLYTAFQYFDKDNSGYITKEEELQALKEQGLYDANEIKDVI  
TDADSNNDGRIDYSEFVAMMRKSGCAEATNPKKRRDLVL\*

>LOC\_Os12g07230 Org\_Osativa peptide: LOC\_Os12g07230.1 CAMK\_CAMK\_like.45 - CAMK includes  
calcium/calmodulin dependent protein kinases, expressed (PAC:33152950)  
MQPDPQPHGRGREKAAGAPRLPPVPTAPSVGRPASVLPKHTANVRDHYRIGKLLGQGGFQGTYYLVCVGPDPGGEYACKSIPKRKLLCREDYEDVWREIQI  
MHHLSEHPNVVIRGAYEDALFVHIVMELCAGGELFDRIIVAKGHYTERAAALLIRTIVGVEGCHSLGVMHRDLKPENFLFASTAEDAPLKATDFGLSVF  
YKPGDKFSDVVGSPYYVAPEVLQKIYGPADVWSAGVILYILLCGVPPFWAETESGIFRQILRGKLDLESDPWPSISDSAKDLVRNMLRDPTRKFTAEH  
VLCHPWIVDDAVAPDKPIDSAVLSRLKHFSAAMNKLKMLRVAIESLSEEEIIGLKEFLKMIIDTNSGTITYDELKNGLRVGS DLMEPEIQALMDAADI  
DNSGTIDYGEFLAATLHMNKLREENLVSAFTFFDKDGSGFITIDELSQACEQFGLSDVHLEDMIKDVQDNDGQIDYSEFAAMMRKGNAGGANAGGVTS  
TGGTGRRTMRNSLRVNLGDILKPNEN\*

>LOC\_Os12g12860 Org\_Osativa peptide: LOC\_Os12g12860.1 CAMK\_CAMK\_like.46 - CAMK includes  
calcium/calmodulin dependent protein kinases, expressed (PAC:33151749)  
MGNCCVSRPSGADKRRRCGSSTAPHTRGGRRVIGAAANMCLSTVSSVSDAARAVMSNEPATVNLGNSGSSNGGVMAAEEMLRREYIEGEEELGRGEFGVTRR  
CRDAVTRGERLACKSISKRKLSSVDVEDVRREVAIMRSLPAHANVVRLEAFEDADAVHLVMEVCEGELFDRIIVARGHYTERAAAVMRTIMDVVQHCH  
KNGVMHRDLKPENFLYANASENSPLKVIDFGLSVCFKPGARFNEIVGSPYMAPEVLRKMYGQEIIDWSAGVILYILLCGVPPFWAETDEGIAQAIIRSH  
IDFQREPWPKVSDNAKDLVRRMLDNPYTRTLTAQVLEHPWIQNASAAPNIPLGEAVRSRLKQFTVMNKFKKALLVVAEYLPTEELDAIRELFNMLDTK  
KKGHLTLEELRKLQVIGHNIHDTDVMLMEAADIDNGILDCKEFVTVSIHLKIRSDHELKPKVFSFFDKNGSGYIEIEELKEALSPRGDQKSIDDIFL  
DVDIDKDGKISYEEFELMMSAGMDWRNASRQYSRAVYNTLSRKIFKEVSLKLDHSGPLVAAGK\*

>LOC\_Os12g30150 Org\_Osativa peptide: LOC\_Os12g30150.1 CAMK\_CAMK\_like.47 - CAMK includes  
calcium/calmodulin dependent protein kinases, expressed (PAC:33154342)  
MGNVCIGPRRNFANGLLGLRPHAAAPSSPSQPTTTSRISIPVVLPSAPSSKPPPTQTAPPVPPVISEPPPPQPPQPAAPSQPPPPQEQSPPPPPA  
SSNTTQQPPPPQQRQSRKPAHIKRISAGLQVESVLRKTKENLKDYSLGRKLGQGGFQGTYYLVCVDPKANGGEYACKSIAKRKLLTDEDVEDVRREIQ  
IMHHLAGHPNIIISIRGAYEDAVAVHVMELCAGGELFDRIIVRKHGHTERQAAGLARVIVAVVESCHSLGVMHRDLKPENFLVFNVEEDAPLKTIIDFGLSM  
FFRPGVEFTDVVGSPPYYVAPEVLKKSQGEADVWSAGVILYILLCGVPPFWAETEQQGIFEQVHLGHTLDFESDPWPNVSDGAKDLLRKLVRDPKRLTAH  
EVLCHPWLMQSGSAPDKPLDSAVLSRLRQFSAMNKLKMLRVAIAENLSEEEIAGLKEMFKMMDTNSGQINYEELKAGLERVGNMKESEIYQLMQAAD  
IDNSGTIDYGEFIAATLHLNKVEREDHLYAFAFYFDKDGSGYITDELQACDEFIEDVRLEDMI GEVDQDNDGRIDYNEFVAMMQKTTTGFQKKGHN  
FSGFRDALKSHS\*

>Mapoly0004s0215 Org\_Mpolymorpha peptide: Mapoly0004s0215.1.p (1 of 3) PTHR24349:SF81 - CALCIUM-  
DEPENDENT PROTEIN KINASE 20 (PAC:33015907)  
MTKSGSIRYKVPNSILQREINENPKDLFIIGRRLGAGQFGTYSCTEKATGKEYACKVPIPKRKLKLLKEDAEVDRREIQIMHLLSGHPNIVDIKAYEDTGN  
VYVMVMEELCAGGELFDRIITQRGHYSEAQAASAIRALEAIEICHELGVFHRDLKPENFLADKDEADAPLKVIDFGLSTYFKIDEVFTDIVGSPYYIAPEVL  
LRNYGPEADVWSAGVILYILLSGIPFWAENEDAIKFLILTSVDFMSETWKSISLPAKDLIQKMLIRNPLKRPTAREALMHPWIQEDGVADVPMDPIV  
QCRLKFKSAMNKLKMAIRVIAENLSEEEIAGLKEIFKMDVTDNSSTITFEELKIALRRFGSVLKDSEIHDLDDAADVDQNGIIDYGEFIAATISLNKVS  
QQENLHIAFYFDRDNGSYITKDELQACVEHHLKDVQVDMIKELDKDNDGRIDYNEFSAMFTRVNSGLSRRASRNSLSTFTGTC\*

>Mapoly0007s0233 Org\_Mpolymorpha peptide: Mapoly0007s0233.1.p (1 of 1) PF00069//PF13499 - Protein  
kinase domain (Pkinase) // EF-hand domain pair (EF-hand\_7) (PAC:33022332)  
MGNTCLGSSVGKNGFFQGVTHPNSTYTPWGRQNSFTSQGNSGTSPANRRSSEPNASAIRSKDLNENSSNLVSHQESSFDTPIYPFATQHRPPVANHIPPGG  
AAAQPGKQPQSAANHRPSTTVTVADPVNPGDPMARRAQPVSVVPGQSLTHSVLQRTTEPLKELFTLGRKLGQGGFQGTYYLQIEKSTGREYACKSIAKRK  
LISQEDVEDVRREIQIMHLLSGHPNIVMIKAYEDSSSVHLMELCAGGELFDRIIQRGHYSEAKAAALTRTIVGVVQACHSLGVMHRDLKPENFLANR  
HEDAPLKATDFGLSVFFKPEEVFTDVVGSPPYYVAPEVLRKHYGPEADVWSAGVILYILLSGVPPFWAETEQQGIFEQVLRGDIIDFMSDPWPTISESAKDLI  
RKMLHPNPAKRLKAHQVLSHPWIEEGVAPDRPIDPAVQSRKQFSAMNKLKMLRVAIAESLSEEEIAGLKEMFKMMDTNSGTITFEELKAGLRVGS  
DLMESEIHELMEAADVDRGDAIDYGEFIAATINLNKIEREENLFAAFSYPDKDKSGYITVDELQACVDHNLGDVRIIDEMIREVDQDNDGRIDYNEFVTM  
MRKNGGIGRHTMRNSLRASLSDVLMEEVQQRMVNTHVDPRAAHRDNRVNGGRK\*

>Mapoly0017s0021 Org\_Mpolymorpha peptide: Mapoly0017s0021.1.p (1 of 2) PTHR24349:SF167 - CALCIUM-  
DEPENDENT PROTEIN KINASE 10-RELATED (PAC:33005537)  
MGNCCACGSPKPHKPSQKSNVYSGDGYPSKVLVFKDVKQGENLHDKYTLGRELGRGEFGITYLRCRDKETQEQLACKSISKRKLRTAVDVEDVRREVAVMH  
HLPSPNIVTLRGVYQDDAAVHLMELCEGELFDRIIARGHYSEREAAVTRTIVEVVQVCHKHRVMHRDLKPENFLFANKENNSPLKAIIDFGLSCFFT  
PGERFSEIVGSPYYMAPEVLRKHYGPEADVWSAGVILYILLCGVPPFWAETEQQVALAILRGVLDVSRDPWPKVSDNAKSLVRHMLLEADPKSRYTAQVQL  
QHPWLQNAKAPNAALGDAVRRARLQFSAMNKLKMLRVAIAEHLSEEEIAGLRLDMFQMMDDTNSGAIITFEELKAGLQKIGSQLAESEVRLMDAADVDG  
NGTLDYGEFVAASIHQRMDNEHLQKFAFAHFRDNGSGYIDMDELRLDALGDDLPNDTDVQIDIMHEVDTDKDQGISYEEFASMMRTGTDRKASRHSR  
ELFNSLSTRLFRDGSFQAGNYSREKR\*

>Mapoly0017s0021 Org\_Mpolymorpha peptide: Mapoly0017s0021.2.p (1 of 2) PTHR24349:SF167 - CALCIUM-  
DEPENDENT PROTEIN KINASE 10-RELATED (PAC:33005538)  
MGNCCACGSPKPHKPSQKSNVYSGDGYPSKVLVFKDVKQGENLHDKYTLGRELGRGEFGITYLRCRDKETQEQLACKSISKRKLRTAVDVEDVRREVAVMH

HLPSHPNIVTLRGVYQDDAAVHLMELCEGEGELFDRI IARGHYSEREA AAVTRTIVEVVQVCHKHRVMHRDLKPENFLFANKENNSPLKAI DFGLSCEFFT  
PGERFSEIVGSPYYMAPEVLKRNYPGEVDVWSAGVILYILLCGVPFFWAE TEQGV ALAILRGVLD FSRDPWPKVSDNAKSLVRHMLEADPKSRYTAQQVL  
QHPWLQNAKKAPNAALGDVAVRARLQFSAMNKLKKKALRI IAEHLSGEEIEGLRDMFQMMDTD NSGAI TFEELKAGLQKIGSQLAESEVRLLM DAADVDG  
NGTLDYGEFVAASIH LQRM DNEEHLQKAF AHFDRNGSGYIDMDEL RDALGDDLGPNDTDV IQDIMHEVDTDKDGGQISYEEFASMMRTGT DWRKASRHSR  
ELFNSLSTRLFRDGSFQAGNYSREKR\*

>Mapoly0017s0021 Org\_Mpolymorpha peptide: Mapoly0017s0021.3.p (1 of 2) PTHR24349:SF167 - CALCIUM-  
DEPENDENT PROTEIN KINASE 10-RELATED (PAC:33005539)  
MGNCCACGSPKPHPKSQSNVSYSGDGYPSKVLVFKDVKQGENLHDKYTLGRELGRGEFGITYLCRDKETQEQLACKSISKRKLRTAVDVEDVRREVAVMH  
HLPSHPNIVTLRGVYQDDAAVHLMELCEGEGELFDRI IARGHYSEREA AAVTRTIVEVVQVCHKHRVMHRDLKPENFLFANKENNSPLKAI DFGLSCEFFT  
PGERFSEIVGSPYYMAPEVLKRNYPGEVDVWSAGVILYILLCGVPFFWAE TEQGV ALAILRGVLD FSRDPWPKVSDNAKSLVRHMLEADPKSRYTAQQVL  
QHPWLQNAKKAPNAALGDVAVRARLQFSAMNKLKKKALRI IAEHLSGEEIEGLRDMFQMMDTD NSGAI TFEELKAGLQKIGSQLAESEVRLLM DAADVDG  
NGTLDYGEFVAASIH LQRM DNEEHLQKAF AHFDRNGSGYIDMDEL RDALGDDLGPNDTDV IQDIMHEVDTDKDGGQISYEEFASMMRTGT DWRKASRHSR  
ELFNSLSTRLFRDGSFQAGNYSREKR\*

>Mapoly0089s0009 Org\_Mpolymorpha peptide: Mapoly0089s0009.1.p (1 of 1) PTHR24349:SF95 - CALCIUM-  
DEPENDENT PROTEIN KINASE 3 (PAC:33014564)  
MGNCVGGHSDRKNGLNPNPAPTINVRQGTGAPQGTGGAGTAGVSAHGSTPAPMGGISAKQKPTLTGNVLRPLEDVRSIYTLGRELGRGQFGVTHLCTH  
KVTGELLACKSIAKRKLTKNDKDDVEDVRREVQIMHHLGQKNIVELKAGYEDKHNHVLVME LCAGGELFDRI IQRGHYSEREA AALCRTIIVQVVTCHSLG  
VMHRDLKPENFLANKKEDAPLKATDFGLSVFFKPEVFTDIVGSAYYVAPEVLRNYPGEADVWSAGVILYILLCGVPFFWAE TEQGI F DAVMHGHIDF  
TSDPWPISIQKAKDLVKSMLKQNPKERLTAHEVLSHPWISVDGEAPDKPLDNVLSRLKQFTAMNKLK LALKVIAESLSEEEIMGLKEMFKSMDTD NSG  
TITFEELKDG LQKQGSNLAESEVRQLMAAADVDNGTIDYLEFITATMHLNKIEKEDHLYAAFQHFQDSSSGFITMEELEQALIKHGMGDPDTLKEI IRE  
VTDHDGRIN YDEFVAMMRKGT PGHQEGHRRSISNMAPV G APRQH H H K \*

>Mapoly0214s0015 Org\_Mpolymorpha peptide: Mapoly0214s0015.1.p (1 of 3) PTHR24349:SF81 - CALCIUM-  
DEPENDENT PROTEIN KINASE 20 (PAC:33016405)  
MAPTRPPAMKMTGNPIADSVLQRKTEVDNEVYTLGHKLQGGQFGVTFYCFQEKATGQTYACKSIAKRKLVLQDDVEDVRREIQIMHHLSGHPNVVTIKDA  
YEDETHVHLMELCAGGELFDRI VIKKGNYS EAAAASL TRTIVGVI AACHSLNVMHRDLKPENFLMANKTEESPLKTTDFGLSVFFKPEFTNLVGSPPY  
IAPEVLNKL YGPEADVWSAGVILYILLCGVPFFWGETDQVIFRKIQGRVVDYNSYWPWSISASAKDLVRRMLDMNPKTRITALEVLNHPVAVDGVAPTE  
PFDPAVQTR LKQFSAMNKLK KMALRVIAESLSAETAGLKEMFKAMDADNSGNITFDELKGG LKRVGSKLSESEI HDLMEAADVDQGTIDYGEFIAATV  
SLSKVEKEENLFAAFSYFDKDKSGYITVDELQQACIDHNLGEVRIEEMLKEIDQNDGRIDYNEFVKMMRMGR LNI \*

>MapolyY\_A0006 Org\_Mpolymorpha peptide: MapolyY\_A0006.1.p (1 of 2) PTHR24349:SF167 - CALCIUM-DEPENDENT  
PROTEIN KINASE 10-RELATED (PAC:33010283)  
MGNCCACGSPKPHPKSQSNVSYSGDGYPSKVLVFKDVKQGENLHDKYTLGRELGRGEFGITYLCRDKETQEQLACKSISKRKLRTAVDVEDVRREVAVMH  
HLPSHPNIVTLRGVYQDDAAVHLMELCEGEGELFDRI IARGHYSEREA AAVTRTIVEVVQVCHKHRVMHRDLKPENFLFASKDANSPLKAI DFGLSCEFFT  
PGERFSEIVGSPYYMAPEVLKRNYPGEVDVWSAGVILYILLCGVPFFWAE TEQGV ALAILRGVLD FSRDPWPKVSDNAKSLVRHMLEADPKRYTAQQVL  
QHPWLQNAKKAPNAALGDVAVRARLQFSAMNKLKKKALRI IAEHLSGEEIEGLRDMFQMMDTD NSGAI TFEELKAGLQKIGSQLAESEVRLLM EAADVDG  
NGTLDYGEFVAASIH LQRM DNEEHLQKAF AHFDRNGSGYIDMDEL REALGDDLGPNDTDV IQDIMHEVDTDKDGGQISYEEFASMMRTGT DWRKASRHSR  
ELFNSLSTRLFRDGS LQAGNYSREKR\*

>MapolyY\_A0006 Org\_Mpolymorpha peptide: MapolyY\_A0006.2.p (1 of 2) PTHR24349:SF167 - CALCIUM-DEPENDENT  
PROTEIN KINASE 10-RELATED (PAC:33010284)  
MGNCCACGSPKPHPKSQSNVSYSGDGYPSKVLVFKDVKQGENLHDKYTLGRELGRGEFGITYLCRDKETQEQLACKSISKRKLRTAVDVEDVRREVAVMH  
HLPSHPNIVTLRGVYQDDAAVHLMELCEGEGELFDRI IARGHYSEREA AAVTRTIVEVVQVCHKHRVMHRDLKPENFLFASKDANSPLKAI DFGLSCEFFT  
PGERFSEIVGSPYYMAPEVLKRNYPGEVDVWSAGVILYILLCGVPFFWAE TEQGV ALAILRGVLD FSRDPWPKVSDNAKSLVRHMLEADPKRYTAQQVL  
GHPWLQNAKKAPNAALGDVAVRARLQFSAMNKLKKKALRI IAEHLSGEEIEGLRDMFQMMDTD NSGAI TFEELKAGLQKIGSQLAESEVRLLM EAADVDG  
NGTLDYGEFVAASIH LQRM DNEEHLQKAF AHFDRNGSGYIDMDEL REALGDDLGPNDTDV IQDIMHEVDTDKDGGQISYEEFASMMRTGT DWRKASRHSR  
ELFNSLSTRLFRDGS LQAGNYSREKR\*

>Medtr0028s0170 Org\_Mtruncatula peptide: Medtr0028s0170.1 (1 of 3) PTHR24349:SF131 - CALCIUM-DEPENDENT  
PROTEIN KINASE 17-RELATED (PAC:31092213)  
MGNCCSQGGDTPADNPAVADKGETNTNQDNEPSTNPITTPPTSKPPQSTAPPSSKPSKPAAVGPVLQRP MEDVRATYSIGKELGRGQFGVTHLCTHKVT  
KEQFACKTIAKRKL VNKEDI EDVRREVQIMHHLTGQANIVELKAGYEDKQSVHLMELCAGGELFDRI IAKGHYTERAAASLMRTIVQI IHTLHSMGVII  
RDLKPENFL LNKDENAPLKATDFGLSVFFKEGEMFKDIVGSAYYIAPEVLKRRYGPVLDIWSIGVMLYILLCGVPFFWAESEHGFNAILRGHIDFTSD  
FWPWSIPAAKDLVRKMLNSDPKQRLTAFEVLNHPWIKEDGEAPDKPIDNAVLNRLKQFRAMNQFKKVALRV IAGCLSEEEIMGLKEMFKGMDTD NSGTIT  
VEELKQGLAKQGT KLSEQEVKQLMDAADADNGTIDYDEFITATMNMNRMREEHLYTAFQYFDKDNSGFITTEELDQALREYNMH DGRDIKEI LQEV D G  
DNDGRIN YDEFAAMMRKGNPEAHTKRRRDSFVSH\*

>Medtr1g026190 Org\_Mtruncatula peptide: Medtr1g026190.1 (1 of 7) PTHR24349:SF89 - CALCIUM-DEPENDENT  
PROTEIN KINASE 29 (PAC:31099703)  
MGHCFTKPHDNRPVSI SYDYG TNSQPQRNQP RPYPH HIAAKSDPTSYSASSSNANASDHHQPI LGRPYIDMKTLYSIGKELGRGQFGVYTLCTENAT  
GRNYACKSISRKLTRKKEIEDVREIMILQDLSGQPNIVEFKGAYEDRESVHLMELC LGGELFDRI TARITAGSYSEREAASIFKQIMNVVHACHFM  
GVMHRDLKPENFL LASKDHKAPLKATDFGLSVFIEEGKVKELVGSAYYVAPEVLKRSYKGEIDWISAGI ILYILLCGVPFFWAE TEKGFQAI LRGHIDFTSD  
LESAPWPSISVAAKDLIRKMLSYPDKKRITASDALEHPWMEGGEASDKPLDNV LIRMKQFRAMNKMKL LALKVIAENLSDEEIKGLKQMFNNIDTDRS  
GTITYEELKSLGSLKSLSESEIKQLMDAADVDKNGTIDYHEFITATINRHKLEREENLFKAFQYFDKDNSGYVTREELRQALAEYQMGDEATIDEVID  
DVDTDNDGRIN YQEFATMMRKGTLDND DKEKPR\*

>Medtr1g041150 Org\_Mtruncatula peptide: Medtr1g041150.1 (1 of 4) PTHR24349:SF161 - CALCIUM-DEPENDENT  
PROTEIN KINASE 1-RELATED (PAC:31095901)  
MGNTCVGSPSISKNGI IQSFSAAIWRSQPPDAEGSVSNRGSVNEGRTDNEPESPLPVQNKPEQITMPKPEIKQEAKSEPESEKKEKKHRRPSVKRSSAG  
LRVDSVLQRETGNFKEFYLSGKGLGQFGTFLCIEKATGYQYACKSIAKRKLVDDEDVEDVRREIQIMHHLGHPNVISIKGAYEDAMAVHVMELCA  
GGELFDRI IQRGHYTERKAAELIRITVGVVEACHSLGVMHRDLKPENFLVNVQEQEDSLLKTI DFGLSVFFMPGDTFIDVVGSPYYVAPEVLKRYGPEAD

VWSAGVILYILLSGVPPFWAESEQGFIFEQVLRGDLDFVSDPWPAPSESADKLVKMLVDRPKRRMATAHQVLCHPWIQVDGVPADKPLDSAVLSRLKQFSA  
MNLKMKMALIVIAESLSEELAGLAKEMFKMIDTNSGQITFEELKVGLKVKGANLKESEIYDLMQAADVNSGTIDYGEFIAATLHINKIEREDHLFAAF  
SYFDKDGSGYITQEELQQACDEFKIKDVRLEEEIIEKIDEDNDGRIDYNEFAAMMQKGNLPMVGGKLENNFSIRFKEALK\*

>Medtr1g041150 Org\_Mtruncatula peptide: Medtr1g041150.2 (1 of 4) PTHR24349:SF161 - CALCIUM-DEPENDENT  
PROTEIN KINASE 1-RELATED (PAC:31095900)  
MGNTCVGSPSISKNGI IQSFAAIWRSQPPDAEGSVSNRGSVNEGRDNEPESPLPVQNKPPPEQITMPKPEIKQEAKSEPESEKEKKKRRPFSVKRSSSAG  
LRVDSVLQRETGNFKEFYSLGKGLQGQFGTTFLEKATGQYACKSIAKRKLVTDDEDVEDVRREIQIMHHLGHPNVI SIKGAYEDAMAVHVMELCA  
GGELFDRI IQRGHYTERKAAELIRTVGVVEACHSLGVMHRDLKPENFLFVNQQEDSLLKTI DFGLSVFFMPGDTFIDVVGSPYVVAPEVLKRYGPEAD  
VWSAGVILYILLSGVPPFWAESEQGFIFEQVLRGDLDFVSDPWPAPSESADKLVKMLVDRPKRRMATAHQVLCHPWIQVDGVPADKPLDSAVLSRLKQFSA  
MNLKMKMALIVIAESLSEELAGLAKEMFKMIDTNSGQITFEELKVGLKVKGANLKESEIYDLMQAADVNSGTIDYGEFIAATLHINKIEREDHLFAAF  
SYFDKDGSGYITQEELQQACDEFKIKDVRLEEEIIEKIDEDNDGRIDYNEFAAMMQKGNLPMVGGKLENNFSIRFKEALK\*

>Medtr1g052530 Org\_Mtruncatula peptide: Medtr1g052530.1 (1 of 1) PTHR24349:SF126 - CALCIUM-DEPENDENT  
PROTEIN KINASE 32 (PAC:31094145)  
MGNCCTNPITKLRREKPKKHGPTTKNKTNKIKNTLVVLKPKTGREILQQYELGRELGRGEFGITYLCKDRETGEELACKSISKDKLRTAIDIEDVRRE  
VEIMRHLPKHFNIVTLKDTYEDDDNVHLVMEELCEGGEFLDRI VAKGHYTERAAATVVKTI VQVVMCHHEGVMHRDLKPENFLFANKKETSPKAI DFG  
SITFKPGDKFNEIVGSPYYMAPEVLKRYNYPEIDIWSAGVILYILLCGIPFFWAEQEQAQAI IIRSVIDFKKEPWPVKVSDNAKDLIKKMLDPPDKRRLT  
AQEVLDPWLQNAKTAPNVS LGETVRARLMQFVSMNKLKKTALRI IADHLSVEEVAGIKEGFQVMDTENKGINLDELVRGLLKGHI PEGDVQILMEA  
GDVDKDGFDYGEFVAISIHRLKISHDEHLQRAFQFFDKNESGFIELEELRNALADEVNTNSEEVINAIMHDVDTDKDGKISYEEFATMMKAGTDWRKAS  
RQYSRERFTSLSIKMLEKESLELNNEGR\*

>Medtr1g052530 Org\_Mtruncatula peptide: Medtr1g052530.2 (1 of 1) PTHR24349:SF126 - CALCIUM-DEPENDENT  
PROTEIN KINASE 32 (PAC:31094146)  
MGNCCTNPITKLRREKPKKHGPTTKNKTNKIKNTLVVLKPKTGREILQQYELGRELGRGEFGITYLCKDRETGEELACKSISKDKLRTAIDIEDVRRE  
VEIMRHLPKHFNIVTLKDTYEDDDNVHLVMEELCEGGEFLDRI VAKGHYTERAAATVVKTI VQVVMCHHEGVMHRDLKPENFLFANKKETSPKAI DFG  
SITFKPGDKFNEIVGSPYYMAPEVLKRYNYPEIDIWSAGVILYILLCGIPFFWAEQEQAQAI IIRSVIDFKKEPWPVKVSDNAKDLIKKMLDPPDKRRLT  
AQEVLDPWLQNAKTAPNVS LGETVRARLMQFVSMNKLKKTALRI IADHLSVEEVAGIKEGFQVMDTENKGINLDELVRGLLKGHI PEGDVQILMEA  
VSIFPLSGIFFFYLFHN\*

>Medtr1g054865 Org\_Mtruncatula peptide: Medtr1g054865.1 (1 of 1) PTHR24349:SF81 - CALCIUM-DEPENDENT  
PROTEIN KINASE 20 (PAC:31098861)  
MGNNCVGPNLGNNGGLQSVSAVWKRTPPEARLPNNAEDKNKPTTTPENAVTGSSKPEKSCAGGKVSHEVSVQSTPPEQVKIAAAEIKPLEHEKPVKAA  
ASSAVAGGGGVAATAAGAGGAGEGADKPKKPTHVKRLSSIGLQVESVLGRKTENIKDFYSLGRKLGQGFQGTTFLEMAKGTNKEFACKSIAKRKLTTO  
EDVEDVRREIRIMHHLGHPNVIQIVGAYEDAVAVHVMELCAGGELFDRI IQRGHYSERKASELTRLILGVVQACHSLGVMHRDLKPENFLFVSHDEES  
ALKTIDFGLSVFFRPGETFTDVGVSPPYVVAPEVLKRYNYPEIDIWSAGVILYILLSGVPPFWDETEQGFIFEQVLRGELDFISDPWPSISESAKDLVRML  
IRDPKRMTAHEVLCHPWVQGGVAPDKPLDSAVLSRLKQFSAMNKLKKAIRVIAENLSEEEIAGLKEMFKMIDTNSGQISLEELKNGLERVGSVLKD  
SEINWLMQAADVNSGTIDYGEFIAAMLHLNKVQKEDHLFAAFNYFDKDGSGYITKDELQQACNQLGLEDHLDI IREADRNDGRIDYSEFVAMMQDT  
DFGKGL\*

>Medtr1g055255 Org\_Mtruncatula peptide: Medtr1g055255.1 (1 of 4) PTHR24349:SF161 - CALCIUM-DEPENDENT  
PROTEIN KINASE 1-RELATED (PAC:31096757)  
MGNNCVGTRFFSKDESSSRATFPSPSCWRSKKS SAHKTSPKPKESVQNNPPVMKIEKEDEKPPQHHHQPQRKPKQTNEAVVATPAKPKRPHNVK  
RLASAGLKADSVLQRKTVSLKEFYTLGPKLGGQGFQGTTFLEKATGQYACKSIAKRKLVTDDEDVEDVRREIQIMHHLGSSNVI SIKESASEDAVAVHV  
VMELCAGGELFDRI VERGHYTERKAAKLARTIVGVIQSCHSLGVMHRDLKPENFLFVNQQEESPLKAI DFGLSVFFMPGDTFIDVVGSPYVVAPEVLKRY  
YGEADVWSAGVILYILLCGVPPFWGESEQDI FEAILNSDLDFSSDPWPSISESAKDLVKKMLVDRPKRRLTAFDVLHRHPWILIDGAAPDKPLDSAVLSR  
MKQFTAMNKLKMALRVIAENLSEEEIAGLKEMFKMIDTNSGHI TFEELKVGLKRFGANLKESEIYDLMKAADVNSGTIDYGEFIAATLHLNKVDRED  
HLHAAFSYFDKDGSGYITKDELQKACEEFGFRDVPLEEMIREVDQNDGRIDYNEFVAMMHRGNAEMGKRGRKGS SFSIGFREALPVC\*

>Medtr1g096490 Org\_Mtruncatula peptide: Medtr1g096490.1 (1 of 6) PTHR24349:SF166 - CALCIUM-DEPENDENT  
PROTEIN KINASE 11-RELATED (PAC:31095859)  
MQKHNLSGSSKSSKCTAVLPYQTPRLRDHYLLGKRLGQGFQGTYYLCTHKSTGKLYACKSIPKRKLLCKEDYDDVWREIQIMHHLSEHPNVVQIQGTYED  
SVFVHLMELCAGGELFDKII IQKGHYSEKAAKLMKTIVGVVETCHSLGVMHRDLKPENFLFDTPGEDAEMKATDFGLSVFYKPGQTFHDVVGSPYYIAP  
ELLCKIYGPQVDVWSAGVILYILLSGVPPFWAETESGIFRQILHGLDLESEPEWPTISESAKDLVKKMLERDPKQRI SAHEVLCHPWILDDTVAPDQPLD  
SAVLRRLKHFSAAMNKLKMALRVIAERLSEEEIIGLKLFLFKMIDTNSGTITYEELKDGKLVGASNLMESEIKSLMESADIDNNGTIDYGEFIAATLHLN  
KMEREENLVAFAFYFDKDGSGYITIDELQQACKDFGLGVEHLDDMIKEIQDNDGRIDYGEFVAMMKGDDQVGRSRTKKNINFNIAADAFVKEESS\*

>Medtr3g051770 Org\_Mtruncatula peptide: Medtr3g051770.1 (1 of 7) PTHR24349:SF89 - CALCIUM-DEPENDENT  
PROTEIN KINASE 29 (PAC:31058617)  
MGCLLSDKDKSEPEHNNGGYRYGEHNHRNNHEQVNTSRTAPTSSYQPIPTKPSISAPSPKPLIKQDSNTILGKGLDVKQFYTLGKELGRGQFGVTFL  
CTENSTGLLYACKSISKRLVSKSDREDIKREIQIMQHLSGQPNIVEFKGAYEDRNSVHVMELCAGGELFDRI IAKGHYSEKAAASICRQIVNVNICH  
FMGVMHRDLKPENFLASKDENALLKATDFGLSVFIEEGKVYRDIVGSAYVVAPEVLRRCCKGEIDIWSAGVILYILLSGVPPFWAETEKGFDAILEGH  
IDFESEPPWKISDSAKDLVRKMLIQEPKRRITAAQVLEHPWIKDGNADKPIDSAVLSRMKQFRAMNKLKLLKLVIAENMSEEEIRGLKAMFTNMDTND  
SGTITYEELKAGLQRLGSKLSEAEVVKLMEAADVDGNGTIDCIEFATMHRHKLERDDHLYKAFQYFDKSSGFTTRDELEATMKEYGMGDDATIKETI  
SEVDTIISEVDTDHDGRINYEFCAMMRSGNQVQVQLF\*

>Medtr3g098070 Org\_Mtruncatula peptide: Medtr3g098070.1 (1 of 6) PTHR24349:SF166 - CALCIUM-DEPENDENT  
PROTEIN KINASE 11-RELATED (PAC:31057225)  
MSKSNNTTTPPKPTWVLPVVTENLREVYTLGRKLGQGFQGITYHCIHNSTGRTYACKSISKKLLCKEDYDDVWREIQIMHHLSENPNVVRHIGTYEDS  
FSVHLMELCEGGEFLDRI VQKGHYSERQAAKLIRTVIVEVEACHSLGVMHRDLKPENFLFDSVDEALLKTI DFGLSVFFMPGDTFIDVVGSPYVVAPE  
VLHKKHYGPEADVWSAGVILYILLSGVPPFWAETDQGFIRQIFQGLDFRSEPEWPGISDSAKDLIRKMLDRNPKTRFTAQVLCHPWIVDDNIAPDKPLD  
AVLSRLKQFSAMNKLKMALRVIAERLSEEEIIGLKLFLFKMIDTNSGTITYEELKELKRVGSELMESEIKDLMDAADIDNNGTIDYGEFIAATVHLNK  
LREENLLSAFSYFDKDCSGYITIDEIQACKEFGLDVHIDEMVKEIQDNDGQIDYGEFAAMMRKGGGIGRRTMTSTLNFRLALGITGNGSN\*

>Medtr3g098090 Org\_Mtruncatula peptide: Medtr3g098090.1 (1 of 6) PTHR24349:SF166 - CALCIUM-DEPENDENT PROTEIN KINASE 11-RELATED (PAC:31060081)  
MSKSNIPDKTPTPTTTPKTTWVLPVTKNLHEVYTLGRKLGQGFQGIYHCTHNSGTGRYACKSISKKLLCKEDYDDAWREIQIMHHLSEHPNVVRIRETY  
EDSFVHLVMEELCEGGELFDRIQVGHYSERQAAKLIKTIIVEVVEACHSLGVMHRDLKPNENFLFSDVDEAVLKTIDFGLSVFYKPGEIFSDISGSPYYV  
APEVLHKKYGEADVMSAGVILYIILSGRLPFCADTENGIFRQICRGRNLNFQSEWPPEISYSAKDLIRKMLDRNPRTRFTAQVLCHPWVDDNIAPDKP  
LDSAVLSRLKQFSAMNKKLKMALHVIKRLNEEEIGGLKELFRMLDADNSGTITLDELKEGLQRVGSELMESEIKDLMDAADIDNNGTLDYGEFIAATVH  
LNKLEREENLLSAFYSYFDKDGSGYITIDEIQAACEFGLDDVHIDEMVKEIQDNDNGQIDYGEFAAMMRKNGGGIGRRTMSSTLDSRDALEIIGNGSN\*  
>Medtr4g066660 Org\_Mtruncatula peptide: Medtr4g066660.1 (1 of 2) PTHR24349:SF160 - CALCIUM-DEPENDENT PROTEIN KINASE 24 (PAC:31111529)  
MGSCVSTQGGKHGGRKSKDHHINTKHKINDQNHENPTPTTRSSSVTGRSSSVTSRQLNVVTPNSPGNIFDKYELGKELGRGEFVTHRCVELKTGEAFAC  
KKIAKTKLRTEIDIQDVRREVQIMRHLPEHPNIVAFREAYEDRDAVYLVMEELCEGGELFDRIIVAKGHYTERAAANVAKTILEVCKVCHHEGVIHRDLKPE  
NFLFADGSEAAASKAIDFGLSTFYVNGDRFNEIVGSPYYMAPEVLRNRYGPEIDIWSTGVILYIILCGVPPFWAETEEAIAQAIIRGNVDFTRDPWPKVS  
EEAKYLVRKMLDPNPFSTRITVQEVLDHWSIQNREHGKNSVLDGQVRSRIKQFSLMNRFKKVKLRVADNLPDEQIDGFRKMFDMMDKDKNGHLTFEELKD  
GFAEIGNVIPPDLQMLMDAADFDGNGTLNCEEFTMSVHMRRLGNDEHLTEAFNFFDKNKSQYVEFDELKDALSDNGSTDDQVIRDILNDVDLKDGRV  
SFEEFKAMMKTGGDWKMASRQYSKAFLNALSRFMFKDKSTGVATN\*  
>Medtr4g107490 Org\_Mtruncatula peptide: Medtr4g107490.1 (1 of 2) PTHR24349:SF167 - CALCIUM-DEPENDENT PROTEIN KINASE 24 (PAC:31106321)  
MGNCNTCINKDAIESTGKATSTTESNSNHRRRKTKPKPKSNPYTEQSLTPGATIRVLKESNPNRNRINDKYIILGRELGRGEFGITYLCTDKETKQELA  
CKSISKRKLRTAVDVEDVRREVAIMSTLPEHPNVKLLKATYEDDENVHLMELCEGGELFDRIIVARGHYSERAAAHVARTIAEVVRMCHVNGVMHRDLKPE  
ENFLFANKKENSVLKAIIDFGLSVFFKPGERFSEIVGSPYYMAPEVLRNRYGPEVDIWSAGVILYIILCGVPPFWAETEEAIAQAIIRGNVDFTRDPWPQI  
SDSAKSLVRQMLEPDPKRLTAEQVLEHPWLQNAKASNVPLGDIVRTRKQFSLMNRFKKRALRVIAEHLSELEVEI IKDMFTLMDTDKDGRIITYEELK  
AGLRKVGSQLAEPEIKLLMDVADVDGNGVLDYGEFVAVTIHLQRMENDEHFRKAFKFFDKDESQYIELSELEAALVDDLGETDTNVLNEIMREVDTDKDG  
RISYEEFVAMMKTGTDWRKASRQYSRERFKSLSINLMKDGSLQLHDEISQAVVV\*  
>Medtr4g132040 Org\_Mtruncatula peptide: Medtr4g132040.1 (1 of 7) PTHR24349:SF89 - CALCIUM-DEPENDENT PROTEIN KINASE 29 (PAC:31115236)  
MGCYTSKPEVDKFAFPHRGYAAITADDDTTYRYVTVTSAYSNIQIQTTPPKLDSLASEPVTAPPNPKPSPTAQNVKTVQKTQKTILEKPYEDIKKLYTFGKE  
LSRGRFGITYFCTENSTGQNYACRSILKRLVSKADKEDIKREIQILQHLSGQPNIVFKGAYEDSLSIHLVLEHCAYGELFDTINAHPHGYSERVVASL  
CRCIVNVVHTCHCMGVMHRDLNPNENFLFSTKDKALTLKAVDFRFSVFIEEGKIYNDMVGSGCYVAPEVLLRSYGKEIDIWSAGIILYIILSGVPPFWAETEEK  
DKGLLNAVLEGEGLDSEPWPSSISDSAKDLVKKMLTDPDKRITSKQVLEHTWMRDGGEASDKPIDISVLSRMKQFRAINTFTKGLKLVMAENLAEVKG  
LKETFENMDTDSSGTITYEELKTGLAQIGSELSEAEENQLMKAADV DKGSGIDYLEFISATMHRRLERDENIHKAFQYFDKDSGHITREELETALT  
KHGISDEAKIKEIVTEVYTDNDGKINYDEFECAMMRSGMPHQGLF\*  
>Medtr4g132070 Org\_Mtruncatula peptide: Medtr4g132070.1 (1 of 7) PTHR24349:SF89 - CALCIUM-DEPENDENT PROTEIN KINASE 29 (PAC:31108323)  
MGCHGSKEKHAKDEFTARQRSSPARPTAPPSPRAGVDSNFRYINVPVQVQSSSTPSSNPKPSAITTQKPVQKQVDTTILGKPYEDIKKLYTLGKELGRG  
QFGITYFCTENSTGLNYACKSILKRLVSKADREDIKREIQILQHLSGQPNIVFEKGFEDRFSVHLVMEELCAGGELFDRIIAQGHYSERAAASICRDVV  
KVVHICHFMGVLHRDLKPNENFLFSSKDDGAALKATDFGLSVFIEEGKVYRDMVGSAYYVAPEVLRNRYGKEIDIWSAGIILYIILSGVPPFWAETEEK  
NAILEGELDFVSEPPWSSISDSAKDLVRKMLTDPDKRITSSTEVLEHPWMMREGGEASDKPIDSAVLSRMKQFRAMNFKKLLKLVMAENLSEEEIKGLKAM  
FANMDTDSSGTITYEELKTGLARIGSRLSEAEVQLMEAADVDGNGSIDYLEFISATMHRRLERDEHLYKAFQYFDKDSNGHITREELETAMTKHGMGD  
EATIKEIIEVVDTDNDGRINYEFEFCAMMRSGMPHQGLF\*  
>Medtr5g009830 Org\_Mtruncatula peptide: Medtr5g009830.1 (1 of 2) PTHR24349:SF95 - CALCIUM-DEPENDENT PROTEIN KINASE 3 (PAC:31086214)  
MGNRISSKHKPSSDSQTRSKSEPSHSTPTSFHPPNRTPKQSTHTPTPSSSPLGRVLGKPMEDVRSTYTFGRELGRGQFGVYTYLVTHKLTKEQFACKSIAT  
RKLIRRDDLDIRREVQIMHHLTGHNRNIVELKGAIEDRHSVNLIMELCAGGELFDRIISKGHYSERAAELCRQIVTVVHNCHTMGMHRDLKPNENFLFL  
SKHENSPLKATDFGLSVFFKPEDVFKDLVGSAYYVAPEVLRNRYGPEADIWSAGIILYIILSGVPPFWAENEQGFDAILRGHLDFASDPWPKISSIAKD  
LIKMLRADPKERISAVEVLDHSMWKEDGASDKPLDIAVLRMTRKQFRAMNKLKVALKVAENLSEEEIIGLKEMFKSMDTDNSGTITFEELKAGLPKLG  
TKISESEVRQLMEAADVDGNGTIDYIEFITATMHLNRMEREDHLYKAFYFDNDKSGYITKEELESALTKNMGMDEKTIKEIIDEVSDNDGRINYEFEV  
AMMRKGNPDLITNKRK\*  
>Medtr5g009830 Org\_Mtruncatula peptide: Medtr5g009830.2 (1 of 2) PTHR24349:SF95 - CALCIUM-DEPENDENT PROTEIN KINASE 3 (PAC:31086213)  
MGNRISSKHKPSSDSQTRSKSEPSHSTPTSFHPPNRTPKQSTHTPTPSSSPLGRVLGKPMEDVRSTYTFGRELGRGQFGVYTYLVTHKLTKEQFACKSIAT  
RKLIRRDDLDIRREVQIMHHLTGHNRNIVELKGAIEDRHSVNLIMELCAGGELFDRIISKGHYSERAAELCRQIVTVVHNCHTMGMHRDLKPNENFLFL  
SKHENSPLKATDFGLSVFFKPEDVFKDLVGSAYYVAPEVLRNRYGPEADIWSAGIILYIILSGVPPFWAENEQGFDAILRGHLDFASDPWPKISSIAKD  
LIKMLRADPKERISAVEVLDHSMWKEDGASDKPLDIAVLRMTRKQFRAMNKLKVALKVAENLSEEEIIGLKEMFKSMDTDNSGTITFEELKAGLPKLG  
TKISESEVRQLMEAADVDGNGTIDYIEFITATMHLNRMEREDHLYKAFYFDNDKSGYITKEELESALTKNMGMDEKTIKEIIDEVSDNDGRINYEFEV  
AMMRKGNPDLITNKRK\*  
>Medtr5g009830 Org\_Mtruncatula peptide: Medtr5g009830.3 (1 of 2) PTHR24349:SF95 - CALCIUM-DEPENDENT PROTEIN KINASE 3 (PAC:31086215)  
MGNRISSKHKPSSDSQTRSKSEPSHSTPTSFHPPNRTPKQSTHTPTPSSSPLGRVLGKPMEDVRSTYTFGRELGRGQFGVYTYLVTHKLTKEQFACKSIAT  
RKLIRRDDLDIRREVQIMHHLTGHNRNIVELKGAIEDRHSVNLIMELCAGGELFDRIISKGHYSERAAELCRQIVTVVHNCHTMGMHRDLKPNENFLFL  
SKHENSPLKATDFGLSVFFKPEDVFKDLVGSAYYVAPEVLRNRYGPEADIWSAGIILYIILSGVPPFWAENEQGFDAILRGHLDFASDPWPKISSIAKD  
LIKMLRADPKERISAVEVLDHSMWKEDGASDKPLDIAVLRMTRKQFRAMNKLKVALKVAENLSEEEIIGLKEMFKSMDTDNSGTITFEELKAGLPKLG  
TKISESEVRQLMEAVRFLHHYLSVTVYYNLYF\*  
>Medtr5g089320 Org\_Mtruncatula peptide: Medtr5g089320.1 (1 of 3) PTHR24349:SF131 - CALCIUM-DEPENDENT PROTEIN KINASE 17-RELATED (PAC:31086627)  
MGNCSSGGTDPEDPKGENNQNDANGDSSATPPPPWSKSPQPSKPSKPSAIGPVLGRPMEDVKATYSMGKELGRGQFGVTHLCTHKTGKQYACKTIA





QILMEAVSFTFTLCLDSILHICIYVFC\*

>Medtr7g106710 Org\_Mtruncatula peptide: Medtr7g106710.1 (1 of 1) PF07714//PF13499//PF13833 - Protein tyrosine kinase (Pkinase\_Tyr) // EF-hand domain pair (EF-hand\_7) // EF-hand domain pair (EF-hand\_8) (PAC:31082859)

MGNNCVGPRRTYEHESFQTSFWWPWSLSWSYPINQQTQISVSQNTNSSQTYQQNPPHVHKIENKDMKTLQSNASDRQTSISQEDAEPTQLKEKATPTKT  
MMSKNINIRRVTPKSAGLRAESVLLTNNPREFYKLGDELGKGFGTTSCLCEKSTRKTYACKAIPKVKLFRENDIEDVRREIEMHHLVGPINVISIK  
GAYEDPVVVYIVMELCEGGELFDRIVERRRHYTERKAAKLARTIVNVVEACHSRGMHRDLKPENFLFVDGDEDSTLMAIDFGLSIFFKPGEKFSDFVGS  
YYVAPEVIEECYGPPEADVWSAGVYIYLLCGTTPPFYGELDREIFDEVLHGEVDFCSDPWPSISESAKDLVKKMLDRDPKTRIKAHEVLSHPWIQVDGVAP  
DRPLDSATLSRLKQFSAMNKLKLMALRVIKLNSEEEISGLKESFKTIDTNTGQITFEKLVGLKFGANLSESEIFDLMQAADI DNNGMIDYGEFIAA  
TLHLNKVKDEHDLVAAFSYFDKDNNGYITQDELQVCKEFGMKDVHFEEMIREADQNNNGQIDYNEFVAMMQRGNADLENNSVKCSSTFNIIGLTKTKTSL  
IC\*

>Medtr7g106710 Org\_Mtruncatula peptide: Medtr7g106710.2 (1 of 1) PF07714//PF13499//PF13833 - Protein tyrosine kinase (Pkinase\_Tyr) // EF-hand domain pair (EF-hand\_7) // EF-hand domain pair (EF-hand\_8) (PAC:31082860)

MGNNCVGPRRTYEHESFQTSFWWPWSLSWSYPINQQTQISVSQNTNSSQTYQQNPPHVHKIENKDMKTLQSNASDRQTSISQEDAEPTQLKEKATPTKT  
MMSKNINIRRVTPKSAGLRAESVLLTNNPREFYKLGDELGKGFGTTSCLCEKSTRKTYACKAIPKVKLFRENDIEDVRREIEMHHLVGPINVISIK  
GAYEDPVVVYIVMELCEGGELFDRIVERRRHYTERKAAKLARTIVNVVEACHSRGMHRDLKPENFLFVDGDEDSTLMAIDFGLSIFFKPGEKFSDFVGS  
YYVAPEVIEECYGPPEADVWSAGVYIYLLCGTTPPFYGELDREIFDEVLHGEVDFCSDPWPSISESAKDLVKKMLDRDPKTRIKAHEVLSHPWIQVDGVAP  
DRPLDSATLSRLKQFSAMNKLKLMALRVIKLNSEEEISGLKESFKTIDTNTGQITFEKLVGLKFGANLSESEIFDLMQAADI DNNGMIDYGEFIAA  
TLHLNKVKDEHDLVAAFSYFDKDNNGYITQDELQVCKEFGMKDVHFEEMIREADQNNVSTYYNVMCFHFRTTE\*

>Medtr7g106710 Org\_Mtruncatula peptide: Medtr7g106710.3 (1 of 1) PF07714//PF13499//PF13833 - Protein tyrosine kinase (Pkinase\_Tyr) // EF-hand domain pair (EF-hand\_7) // EF-hand domain pair (EF-hand\_8) (PAC:31082864)

MGNNCVGPRRTYEHESFQTSFWWPWSLSWSYPINQQTQISVSQNTNSSQTYQQNPPHVHKIENKDMKTLQSNASDRQTSISQEDAEPTQLKEKATPTKT  
MMSKNINIRRVTPKSAGLRAESVLLTNNPREFYKLGDELGKGFGTTSCLCEKSTRKTYACKAIPKVKLFRENDIEDVRREIEMHHLVGPINVISIK  
GAYEDPVVVYIVMELCEGGELFDRIVERRRHYTERKAAKLARTIVNVVEACHSRGMHRDLKPENFLFVDGDEDSTLMAIDFGLSIFFKPGEKFSDFVGS  
YYVAPEVIEECYGPPEADVWSAGVYIYLLCGTTPPFYGELDREIFDEVLHGEVDFCSDPWPSISESAKDLVKKMLDRDPKTRIKAHEVLSHPWIQVDGVAP  
DRPLDSATLSRLKQFSAMNKLKLMALRVSTFSIT\*

>Medtr7g106710 Org\_Mtruncatula peptide: Medtr7g106710.4 (1 of 1) PF07714//PF13499//PF13833 - Protein tyrosine kinase (Pkinase\_Tyr) // EF-hand domain pair (EF-hand\_7) // EF-hand domain pair (EF-hand\_8) (PAC:31082861)

MGNNCVGPRRTYEHESFQTSFWWPWSLSWSYPINQQTQISVSQNTNSSQTYQQNPPHVHKIENKDMKTLQSNASDRQTSISQEDAEPTQLKEKATPTKT  
MMSKNINIRRVTPKSAGLRAESVLLTNNPREFYKLGDELGKGFGTTSCLCEKSTRKTYACKAIPKVKLFRENDIEDVRREIEMHHLVGPINVISIK  
GAYEDPVVVYIVMELCEGGELFDRIVERRRHYTERKAAKLARTIVNVVEACHSRGMHRDLKPENFLFVDGDEDSTLMAIDFGLSIFFKPGEKFSDFVGS  
YYVAPEVIEECYGPPEADVWSAGVYIYLLCGTTPPFYGELDREIFDEVLHGEVDFCSDPWPSISESAKDLVKKMLDRDPKTRIKAHEVLSHPWIQVDGVAP  
DRPLDSATLSRLKQFSAMNKLKLMALRVIKLNSEEEISGLKESFKTIDTNTGQITFEKLVGLKFGANLSESEIFDLMQAVSIKSKIIVNSLNVTTQQ  
TLLLL\*

>Medtr7g106710 Org\_Mtruncatula peptide: Medtr7g106710.5 (1 of 1) PF07714//PF13499//PF13833 - Protein tyrosine kinase (Pkinase\_Tyr) // EF-hand domain pair (EF-hand\_7) // EF-hand domain pair (EF-hand\_8) (PAC:31082863)

MGNNCVGPRRTYEHESFQTSFWWPWSLSWSYPINQQTQISVSQNTNSSQTYQQNPPHVHKIENKDMKTLQSNASDRQTSISQEDAEPTQLKEKATPTKT  
MMSKNINIRRVTPKSAGLRAESVLLTNNPREFYKLGDELGKGFGTTSCLCEKSTRKTYACKAIPKVKLFRENDIEDVRREIEMHHLVGPINVISIK  
GAYEDPVVVYIVMELCEGGELFDRIVERRRHYTERKAAKLARTIVNVVEACHSRGMHRDLKPENFLFVDGDEDSTLMAIDFGLSIFFKPGEKFSDFVGS  
YYVAPEVIEECYGPPEADVWSAGVYIYLLCGTTPPFYGELDREIFDEVLHGEVDFCSDPWPSISESAKDLVKKMLDRDPKTRIKAHEVLSHPWIQVDGVAP  
DRPLDSATLSRLKQFSAMNKLKLMALRVSTFSIT\*

>Medtr7g106710 Org\_Mtruncatula peptide: Medtr7g106710.6 (1 of 1) PF07714//PF13499//PF13833 - Protein tyrosine kinase (Pkinase\_Tyr) // EF-hand domain pair (EF-hand\_7) // EF-hand domain pair (EF-hand\_8) (PAC:31082862)

MGNNCVGPRRTYEHESFQTSFWWPWSLSWSYPINQQTQISVSQNTNSSQTYQQNPPHVHKIENKDMKTLQSNASDRQTSISQEDAEPTQLKEKATPTKT  
MMSKNINIRRVTPKSAGLRAESVLLTNNPREFYKLGDELGKGFGTTSCLCEKSTRKTYACKAIPKVKLFRENDIEDVRREIEMHHLVGPINVISIK  
GAYEDPVVVYIVMELCEGGELFDRIVERRRHYTERKAAKLARTIVNVVEACHSRGMHRDLKPENFLFVDGDEDSTLMAIDFGLSIFFKPGEKFSDFVGS  
YYVAPEVIEECYGPPEADVWSAGVYIYLLCGTTPPFYGELDREIFDEVLHGEVDFCSDPWPSISESAKDLVKKMLDRDPKTRIKAHEVLSHPWIQVDGVAP  
DRPLDSATLSRLKQFSAMNKLKLMALRVSTFSIT\*

>Medtr8g095440 Org\_Mtruncatula peptide: Medtr8g095440.1 (1 of 6) PTHR24349:SF166 - CALCIUM-DEPENDENT PROTEIN KINASE 11-RELATED (PAC:31073956)

MAKENPTPTIALKPVTVWVLPYRTEKVTETIYRMGRKLGQGFQGTYYLCTHKSTNKKFACKSIPKRKLFCKEDYEDVWREIQIMHHLSEHPHVRIEGTYED  
STAVHIVMELCEGGELFDRIVKKGHYSERQAAGLIKTIVEVVECHSLGMHRDLKPENFLFDTVDEDAKDKATDFGLSVFYKPGESFSDVVGSPYVAP  
EVLRLKLYGPESDVWSAGVYIYLLSGVPPFAETEPIFRQILLGKLDQSEPWPSISDSAKDLIRKMLDQNPRTLRTAHEVLRHPWIVDDNIAPDKPID  
SAVLSRLKQFSAMNKLKLMALRVIKLNSEEEISGLKELFKMIDTSSGTITFDELKDGKRVGSELMESEIQDLMDAADVDKSGTIDYGEFIAATVHLN  
KLREBENLLSAFAYFDKASGYITIDEISQACKDFGLDDIHIDEMIKEIDQDNDGQIDYSEFAAMMRKGGIGRTRMNTLNLRDALGLVNGSNQVID  
GYL\*

>Medtr8g095440 Org\_Mtruncatula peptide: Medtr8g095440.2 (1 of 6) PTHR24349:SF166 - CALCIUM-DEPENDENT PROTEIN KINASE 11-RELATED (PAC:31073957)

MAKENPTPTIALKPVTVWVLPYRTEKVTETIYRMGRKLGQGFQGTYYLCTHKSTNKKFACKSIPKRKLFCKEDYEDVWREIQIMHHLSEHPHVRIEGTYED  
STAVHIVMELCEGGELFDRIVKKGHYSERQAAGLIKTIVEVVECHSLGMHRDLKPENFLFDTVDEDAKDKATDFGLSVFYKPGESFSDVVGSPYVAP

EVLRLKLYGPESDVWSAGVILYILLSGVPPFWAETEPPGIFRQILLGKLDQFQSEPWPSISDSAKDLIRKMLDQNPRTLRTAHEVLRHPWIVDDNIAPDKPID  
SAVLSRLKQFSAMNKLKMLRVAIERLSEEEIGGLKELFKMIDTSSGTTTFDELKDGKRVGSELMESEIQDLMDAVSVFLWEDNSFFMQALNLTQS  
SLP\*

>Medtr8g099095 Org\_Mtruncatula peptide: Medtr8g099095.1 (1 of 2) PTHR24349:SF95 - CALCIUM-DEPENDENT  
PROTEIN KINASE 3 (PAC:31073428)  
MGGNCSTGAGAGINTTTTTPHSDPPKNAFTILPQNFTPSPPQPLPTTTTLGRILNRPMDVRSIFIFGRELGRGQFGVTVLVTHKVTKEQFACKSIATR  
KLVNRDDIDDVREVEQIMHHLTGHRNIVELKYGAYEKHSVNLVMECLCAGGELFDRIILKGYHSERAANLCRQIVTVVHNCHTMGVMHRDLKPENFLFLG  
KEENSPLKATDFGLSVFFKPGDVFVKDLVGSAYYVAPEVLRKSYGPETDIWSAGIILYILLSGVPPFWAENEQGFDAILRQIDFASDPWPSISSAKDL  
VKKMLRNDAKERISAVEVNLHPWMRVDGDASDKPLDIAVLSRMKQFRAMNKLKVALKVAENLSEEEIIGLKEMFKSMDTDNSGTITFEELKAGLPKLG  
SKMSESEVRQLMEAADVNGTIDYIEFITATMNMNRMEREDHLYKAFEYFDQDKSGYITKEELESALKKYNMGDENTIKEIEAEVDTDNARINDEFV  
AMMRKGNPDI THRRRK\*

>Pp3c11\_25550 Org\_Ppatens peptide: Pp3c11\_25550V3.1.p (1 of 1) PF00069//PF13202//PF13499 - Protein  
kinase domain (Pkinase) // EF hand (EF-hand\_5) // EF-hand domain pair (EF-hand\_7) (PAC:32958204)  
MADFEVLVGFQEHVPLPALQATDDLEKLYSLGKKGEGQFGTYYLCTERATGLQFACKCIPKRKLISSEIEIDVGREVEVMYHLSGHPNIVTLKGA  
DATNVYLVMECLCEGELFDRIIERGTYTEAEARLRTITVSVVEACHKSGVVHRDLKPENFLFKTKEDDSVLKAAADFGSARFFEPGDVFTDIVGSPYYVA  
PEVLDHRHYGPEADIWSAGVMLYILLSGAPFFWAETVQGFIEKVMGEGPPTFTADPWPNISEVAKDLIRKMLDPNPEKRLKAHEVNLNHPWIRE  
DGVAPKPKIASLVQFRMKQFAAMNKLKLAIRIAETLSEEEIANLKEIFTEMDSNDGAIISFEELKAGLLRVGTSLKDAELFDLMDAADVDHDMIDCGEFLAATLS  
LNHIELEENLMAAFQYLDKSGSGYITDELLAVCFEFHMEVRLLEDLLHDVSIADGSDIDYKMFVMTMRKCNMGGMGHQNLRLCTLGITDVLTL  
LEEQY\*

>Pp3c11\_25550 Org\_Ppatens peptide: Pp3c11\_25550V3.2.p (1 of 1) PF00069//PF13202//PF13499 - Protein  
kinase domain (Pkinase) // EF hand (EF-hand\_5) // EF-hand domain pair (EF-hand\_7) (PAC:32958205)  
MADFEVLVGFQEHVPLPALQATDDLEKLYSLGKKGEGQFGTYYLCTERATGLQFACKCIPKRKLISSEIEIDVGREVEVMYHLSGHPNIVTLKGA  
DATNVYLVMECLCEGELFDRIIERGTYTEAEARLRTITVSVVEACHKSGVVHRDLKPENFLFKTKEDDSVLKAAADFGSARFFEPGDVFTDIVGSPYYVA  
PEVLDHRHYGPEADIWSAGVMLYILLSGAPFFWAETVQGFIEKVMGEGPPTFTADPWPNISEVAKDLIRKMLDPNPEKRLKAHEVNLNHPWIRE  
DGVAPKPKIASLVQFRMKQFAAMNKLKLAIRIAETLSEEEIANLKEIFTEMDSNDGAIISFEELKAGLLRVGTSLKDAELFDLMDAADVDHDMIDCGEFLAATLS  
LNHIELEENLMAAFQYLDKSGSGYITDELLAVCFEFHMEVRLLEDLLHDVSIADGSDIDYKMFVMTMRKCNMGGMGHQNLRLCTLGITDVLTL  
LEEQY\*

>Pp3c11\_4640 Org\_Ppatens peptide: Pp3c11\_4640V3.1.p (1 of 2) PTHR24349:SF93 - CALCIUM-DEPENDENT PROTEIN  
KINASE 14 (PAC:32959137)  
MGNCCVGSSTTKPKQRPNPFAQDGYQTNLQILKNQPKSRILDKYNLGRLEGRGEGFITYLCTDKETGEVFAKSIKSKKLRATAVDVDRREVAIMKHL  
LHPNIVTLKGAIEDDNAVHLMELCEGELFDRIIARGHYTERGAAQVTRTIVEVVQACHRQGVHRDLKPENFLFANKNENSPKLAIDFGLSVFFKPG  
RFSEIVGSPYYMAPEVLKRNYPGEVDVWSAGVILYILLCGVPPFWAETEQVAQAILRGLDFKRDWPVKVSDSAKSLVRHMLEPDPKARYSAQVLDHP  
WLQNAKKNPNVPLDAVRSRLKQFSAMNKLKRALQVIAEHLGGEEIDGLKEIFEKLDSDKTGTITFEKLMGLIEIGSQLTEHEVRMLMEAADV  
DNGTLDYGEFVAATVHLQRLDDDEHLRRAFDFDVRDSGYIETEELREAVGEPLNGSPSETDVVQAILLEVDIDKDGRIISYEEFATMMRRGTDRKASRQ  
YSRDRFNLSMRLLRDGS LNPKIVAVR\*

>Pp3c11\_4640 Org\_Ppatens peptide: Pp3c11\_4640V3.2.p (1 of 2) PTHR24349:SF93 - CALCIUM-DEPENDENT PROTEIN  
KINASE 14 (PAC:32959139)  
MKHLEHPNIVTLKGAIEDDNAVHLMELCEGELFDRIIARGHYTERGAAQVTRTIVEVVQACHRQGVHRDLKPENFLFANKNENSPKLAIDFGLSVF  
FKPGERFSEIVGSPYYMAPEVLKRNYPGEVDVWSAGVILYILLCGVPPFWAETEQVAQAILRGLDFKRDWPVKVSDSAKSLVRHMLEPDPKARYSAQ  
VLDHPWLQNAKKNPNVPLDAVRSRLKQFSAMNKLKRALQVIAEHLGGEEIDGLKEIFEKLDSDKTGTITFEKLMGLIEIGSQLTEHEVRMLMEAADV  
DNGTLDYGEFVAATVHLQRLDDDEHLRRAFDFDVRDSGYIETEELREAVGEPLNGSPSETDVVQAILLEVDIDKDGRIISYEEFATMMRRGTDRKASRQ  
YSRDRFNLSMRLLRDGS LNPKIVAVR\*

>Pp3c11\_4640 Org\_Ppatens peptide: Pp3c11\_4640V3.3.p (1 of 2) PTHR24349:SF93 - CALCIUM-DEPENDENT PROTEIN  
KINASE 14 (PAC:32959138)  
MKHLEHPNIVTLKGAIEDDNAVHLMELCEGELFDRIIARGHYTERGAAQVTRTIVEVVQACHRQGVHRDLKPENFLFANKNENSPKLAIDFGLSVF  
FKPGERFSEIVGSPYYMAPEVLKRNYPGEVDVWSAGVILYILLCGVPPFWAETEQVAQAILRGLDFKRDWPVKVSDSAKSLVRHMLEPDPKARYSAQ  
VLDHPWLQNAKKNPNVPLDAVRSRLKQFSAMNKLKRALQVIAEHLGGEEIDGLKEIFEKLDSDKTGTITFEKLMGLIEIGSQLTEHEVRMLMEAADV  
DNGTLDYGEFVAATVHLQRLDDDEHLRRAFDFDVRDSGYIETEELREAVGEPLNGSPSETDVVQAILLEVDIDKDGRIISYEEFATMMRRGTDRKASRQ  
YSRDRFNLSMRLLRDGS LNPKIVAVRFCAGFFGLFFRCLLKDCHC\*

>Pp3c11\_5760 Org\_Ppatens peptide: Pp3c11\_5760V3.1.p (1 of 4) PTHR24349:SF167 - CALCIUM-DEPENDENT  
PROTEIN KINASE 10-RELATED (PAC:32956551)  
MGNCCVGSSTKKSRRKERRQNPFPADQDGYQTNNQILKNQPKARILDKYVLGRELGRGEGFITYLCTDKETQEVFAKSIKSKKLRATAVDVDRREVAIMK  
HLPHHPHIVTLEGAYEDDVAHLMELCEGELFDRIIARGHYTERGAAQVTRTIVEVVQACHRQGVHRDLKPENFLFANTNENAPLKAIDFGLSVFFK  
PGERFSEIVGSPYYMAPEVLKRNYPGEVDVWSAGVILYILLCGVPPFWAETEQVAQAILRGLDFKREPWPKVSETAKSLVRHMLEPDPKARYNAQV  
DHPWLQNAKKNPNVPLDAVRSRLKQFSAMNKLKRALQVIAEHLGGEEIDGLKEMFEKLDSDKTGTITFEKLMGLIEIGSQLTEHEVRMLMEAADVEGN  
GTLDYGEFVAATVHLQRLDDDEHLRRAFDFDVRDSGYIETEELREAVGEAMTELSSEPDVVQAILSEVDLDDKDGRIISYEEFAVMMRRGTDRKASRQ  
YSRDRFNLSMRLLRDGS LNPPSYSSMSMR\*

>Pp3c11\_5760 Org\_Ppatens peptide: Pp3c11\_5760V3.2.p (1 of 4) PTHR24349:SF167 - CALCIUM-DEPENDENT  
PROTEIN KINASE 10-RELATED (PAC:32956552)  
MGNCCVGSSTKKSRRKERRQNPFPADQDGYQTNNQILKNQPKARILDKYVLGRELGRGEGFITYLCTDKETQEVFAKSIKSKKLRATAVDVDRREVAIMK  
HLPHHPHIVTLEGAYEDDVAHLMELCEGELFDRIIARGHYTERGAAQVTRTIVEVVQACHRQGVHRDLKPENFLFANTNENAPLKAIDFGLSVFFK  
PGERFSEIVGSPYYMAPEVLKRNYPGEVDVWSAGVILYILLCGVPPFWAETEQVAQAILRGLDFKREPWPKVSETAKSLVRHMLEPDPKARYNAQV  
DHPWLQNAKKNPNVPLDAVRSRLKQFSAMNKLKRALQVIAEHLGGEEIDGLKEMFEKLDSDKTGTITFEKLMGLIEIGSQLTEHEVRMLMEAADVEGN  
GTLDYGEFVAATVHLQRLDDDEHLRRAFDFDVRDSGYIETEELREAVGEAMTELSSEPDVVQAILSEVDLDDKDGRIISYEEFAVMMRRGTDRKASRQ  
YSRDRFNLSMRLLRDGS LNPPSYSSMSMR\*

>Pp3c11\_5760 Org\_Ppatens peptide: Pp3c11\_5760V3.3.p (1 of 4) PTHR24349:SF167 - CALCIUM-DEPENDENT  
PROTEIN KINASE 10-RELATED (PAC:32956553)

MGNCCVGSSTKKSRRKERRQNPFAPQDGYQTNNQILKNQPKARILDKYVLGRELGRGEFGITYLCTDKETQEVFACKSISKKKLRTAVDVEDVRREVAIMK  
HLPHPHPIVTLLEGAYEDDVAVHLVLMELCEGGEELFDRI IARGHYTERGAAQVTRTIVEVVQACHRQGV IHRDLKPENFLFANTNENAPLKAIDFGLSVFFK  
PGERFSEIVGSPYYMAPEVLKRNNGPEVDVWSAGVILYILLCGVPPFWAETEQQGVAQAILRGILDFKREPWPVKVSETAKSLVRHMLEPDPKARYNAQQVL  
DHPWLQNAKKNPNVPLDAVRSRLKQFSAMNKLKRALQVIAEHLGGEEIDGLKEMFEKLDSDKTGTITFEKLMGLIEIGSQLTEHEVRMLMEAADVEGN  
GTLDYGEFVAATVHLQRLDDDEHLRRAFDFVDVDSGSGYIETEELREAVGEAMTELSSEPDVVQAILSEVDLDDKDGRI SYEEFVMMRRGTDRWKASRQYS  
RDRFNLSMRLLRDGSLNPPSYMSMSMR\*

>Pp3c11\_5760 Org\_Ppatens peptide: Pp3c11\_5760V3.4.p (1 of 4) PTHR24349:SF167 - CALCIUM-DEPENDENT  
PROTEIN KINASE 10-RELATED (PAC:32956554)

MGNCCVGSSTKKSRRKERRQNPFAPQDGYQTNNQILKNQPKARILDKYVLGRELGRGEFGITYLCTDKETQEVFACKSISKKKLRTAVDVEDVRREVAIMK  
HLPHPHPIVTLLEGAYEDDVAVHLVLMELCEGGEELFDRI IARGHYTERGAAQVTRTIVEVVQACHRQGV IHRDLKPENFLFANTNENAPLKAIDFGLSVFFK  
PGERFSEIVGSPYYMAPEVLKRNNGPEVDVWSAGVILYILLCGVPPFWAETEQQGVAQAILRGILDFKREPWPVKVSETAKSLVRHMLEPDPKARYNAQQVL  
DHPWLQNAKKNPNVPLDAVRSRLKQFSAMNKLKRALQVIAEHLGGEEIDGLKEMFEKLDSDKTGTITFEKLMGLIEIGSQLTEHEVRMLMEAADVEGN  
GTLDYGEFVAATVHLQRLDDDEHLRRAFDFVDVDSGSGYIETEELREAVGEAMTELSSEPDVVQAILSEVDLDDKDGRI SYEEFVMMRRGTDRWKASRQYS  
RDRFNLSMRLLRDGSLNPPSYMSMSMR\*

>Pp3c11\_5760 Org\_Ppatens peptide: Pp3c11\_5760V3.5.p (1 of 4) PTHR24349:SF167 - CALCIUM-DEPENDENT  
PROTEIN KINASE 10-RELATED (PAC:32956558)

MKHLPHHPHPIVTLLEGAYEDDVAVHLVLMELCEGGEELFDRI IARGHYTERGAAQVTRTIVEVVQACHRQGV IHRDLKPENFLFANTNENAPLKAIDFGLSVF  
FKPGERFSEIVGSPYYMAPEVLKRNNGPEVDVWSAGVILYILLCGVPPFWAETEQQGVAQAILRGILDFKREPWPVKVSETAKSLVRHMLEPDPKARYNAQQ  
VLDHPWLQNAKKNPNVPLDAVRSRLKQFSAMNKLKRALQVIAEHLGGEEIDGLKEMFEKLDSDKTGTITFEKLMGLIEIGSQLTEHEVRMLMEAADVE  
GNGTLDYGEFVAATVHLQRLDDDEHLRRAFDFVDVDSGSGYIETEELREAVGEAMTELSSEPDVVQAILSEVDLDDKDGRI SYEEFVMMRRGTDRWKASRQ  
YSRDRFNLSMRLLRDGSLNPPSYMSMSMR\*

>Pp3c11\_5760 Org\_Ppatens peptide: Pp3c11\_5760V3.6.p (1 of 4) PTHR24349:SF167 - CALCIUM-DEPENDENT  
PROTEIN KINASE 10-RELATED (PAC:32956555)

MGNCCVGSSTKKSRRKERRQNPFAPQDGYQTNNQILKNQPKARILDKYVLGRELGRGEFGITYLCTDKETQEVFACKSISKKKLRTAVDVEDVRREVAIMK  
HLPHPHPIVTLLEGAYEDDVAVHLVLMELCEGGEELFDRI IARGHYTERGAAQVTRTIVEVVQACHRQGV IHRDLKPENFLFANTNENAPLKAIDFGLSVFFK  
PGERFSEIVGSPYYMAPEVLKRNNGPEVDVWSAGVILYILLCGVPPFWAETEQQGVAQAILRGILDFKREPWPVKVSETAKSLVRHMLEPDPKARYNAQQVL  
DHPWLQNAKKNPNVPLDAVRSRLKQFSAMNKLKRALQVIAEHLGGEEIDGLKEMFEKLDSDKTGTITFEKLMGLIEIGSQLTEHEVRMLMEAADVEGN  
GTLDYGEFVAATVHLQRLDDDEHLRRAFDFVDVDSGSGYIETEELREAVGEAMTELSSEPDVVQAILSEVDLDDKDGRI SYEEFVMMRRGTDRWKASRQYS  
RDRFNLSMRLLRDGSLNPPSYMSMSMR\*

>Pp3c11\_5760 Org\_Ppatens peptide: Pp3c11\_5760V3.7.p (1 of 4) PTHR24349:SF167 - CALCIUM-DEPENDENT  
PROTEIN KINASE 10-RELATED (PAC:32956556)

MGNCCVGSSTKKSRRKERRQNPFAPQDGYQTNNQILKNQPKARILDKYVLGRELGRGEFGITYLCTDKETQEVFACKSISKKKLRTAVDVEDVRREVAIMK  
HLPHPHPIVTLLEGAYEDDVAVHLVLMELCEGGEELFDRI IARGHYTERGAAQVTRTIVEVVQACHRQGV IHRDLKPENFLFANTNENAPLKAIDFGLSVFFK  
PGERFSEIVGSPYYMAPEVLKRNNGPEVDVWSAGVILYILLCGVPPFWAETEQQGVAQAILRGILDFKREPWPVKVSETAKSLVRHMLEPDPKARYNAQQVL  
DHPWLQNAKKNPNVPLDAVRSRLKQFSAMNKLKRALQVIAEHLGGEEIDGLKEMFEKLDSDKTGTITFEKLMGLIEIGSQLTEHEVRMLMEAADVEGN  
GTLDYGEFVAATVHLQRLDDDEHLRRAFDFVDVDSGSGYIETEELREAVGEAMTELSSEPDVVQAILSEVDLDDKDGRI SYEEFVMMRRGTDRWKASRQYS  
RDRFNLSMRLLRDGSLNPPSYMSMSMR\*

>Pp3c11\_5760 Org\_Ppatens peptide: Pp3c11\_5760V3.8.p (1 of 4) PTHR24349:SF167 - CALCIUM-DEPENDENT  
PROTEIN KINASE 10-RELATED (PAC:32956559)

MKHLPHHPHPIVTLLEGAYEDDVAVHLVLMELCEGGEELFDRI IARGHYTERGAAQVTRTIVEVVQACHRQGV IHRDLKPENFLFANTNENAPLKAIDFGLSVF  
FKPGERFSEIVGSPYYMAPEVLKRNNGPEVDVWSAGVILYILLCGVPPFWAETEQQGVAQAILRGILDFKREPWPVKVSETAKSLVRHMLEPDPKARYNAQQ  
VLDHPWLQNAKKNPNVPLDAVRSRLKQFSAMNKLKRALQVIAEHLGGEEIDGLKEMFEKLDSDKTGTITFEKLMGLIEIGSQLTEHEVRMLMEAADVE  
GNGTLDYGEFVAATVHLQRLDDDEHLRRAFDFVDVDSGSGYIETEELREAVGEAMTELSSEPDVVQAILSEVDLDDKDGRI SYEEFVMMRRGTDRWKASRQ  
YSRDRFNLSMRLLRDGSLNPPSYMSMSMR\*

>Pp3c11\_5760 Org\_Ppatens peptide: Pp3c11\_5760V3.9.p (1 of 4) PTHR24349:SF167 - CALCIUM-DEPENDENT  
PROTEIN KINASE 10-RELATED (PAC:32956557)

MGNCCVGSSTKKSRRKERRQNPFAPQDGYQTNNQILKNQPKARILDKYVLGRELGRGEFGITYLCTDKETQEVFACKSISKKKLRTAVDVEDVRREVAIMK  
HLPHPHPIVTLLEGAYEDDVAVHLVLMELCEGGEELFDRI IARGHYTERGAAQVTRTIVEVVQACHRQGV IHRDLKPENFLFANTNENAPLKAIDFGLSVFFK  
PGERFSEIVGSPYYMAPEVLKRNNGPEVDVWSAGVILYILLCGVPPFWAETEQQGVAQAILRGILDFKREPWPVKVSETAKSLVRHMLEPDPKARYNAQQVL  
DHPWLQNAKKNPNVPLDAVRSRLKQFSAMNKLKRALQVIAEHLGGEEIDGLKEMFEKLDSDKTGTITFEKLMGLIEIGSQLTEHEVRMLMEAADVEGN  
GTLDYGEFVAATVHLQRLDDDEHLRRAFDFVDVDSGSGYIETEELREAVGEAMTELSSEPDVVQAILSEVDLDDKDGRI SYEEFVMMRRGTDRWKASRQYS  
RDRFNLSMRLLRDGSLNPPSYMSMSMR\*

>Pp3c11\_5820 Org\_Ppatens peptide: Pp3c11\_5820V3.1.p (1 of 4) PTHR24349:SF167 - CALCIUM-DEPENDENT  
PROTEIN KINASE 10-RELATED (PAC:32957965)

MGNCCVGSSTKKSRRARRANLFAHRRYGNQILKNQPKARILDKYVLGRELGRGEFGITYLCTDKETQEVFACKSISKKKLRTAVDVEDVRREVAIMKH  
LPHHPHPIVTLLEGAYEDDVAVHLVLMELCEGGEELFDRI IARGHYTERGAAQVTRTIVEVVQACHRQGV IHRDLKPENFLFANTNENAPLKAIDFGLSVFFK  
PGERFSEIVGSPYYMAPEVLKRNNGPEVDVWSAGVILYILLCGVPPFWAETEQQGVAQAILRGILDFKREPWPVKVSETAKSLVRHMLEPDPKARYNAQQVL  
HPWLQNAKKNPNVPLDAVRSRLKQFSAMNKLKRALQVIAEHLGGEEIDGLKEMFEKLDSDKTGTITFEKLMGLIEIGSQLTEHEVRMLMEAADVEGN  
TLDYGEFVAATVHLQRLDDDEHLRRAFDFVDVDSGSGYIETEELREAVGEAMTELSSEPDVVQAILSEVDLDDKDGRI SYEEFVMMRRGTDRWKASRQYS  
DRFNLSMRLLRDGSLNPPSYMSMSMR\*

>Pp3c11\_5820 Org\_Ppatens peptide: Pp3c11\_5820V3.2.p (1 of 4) PTHR24349:SF167 - CALCIUM-DEPENDENT  
PROTEIN KINASE 10-RELATED (PAC:32957966)

MGNCCVGSSTKKSRRARRANLFAHRRYGNQILKNQPKARILDKYVLGRELGRGEFGITYLCTDKETQEVFACKSISKKKLRTAVDVEDVRREVAIMKH  
LPHHPHPIVTLLEGAYEDDVAVHLVLMELCEGGEELFDRI IARGHYTERGAAQVTRTIVEVVQACHRQGV IHRDLKPENFLFANTNENAPLKAIDFGLSVFFK  
PGERFSEIVGSPYYMAPEVLKRNNGPEVDVWSAGVILYILLCGVPPFWAETEQQGVAQAILRGILDFKREPWPVKVSETAKSLVRHMLEPDPKARYNAQQVL  
DHPWLQNAKKNPNVPLDAVRSRLKQFSAMNKLKRALQVIAEHLGGEEIDGLKEMFEKLDSDKTGTITFEKLMGLIEIGSQLTEHEVRMLMEAADVEGN  
GTLDYGEFVAATVHLQRLDDDEHLRRAFDFVDVDSGSGYIETEELREAVGEAMTELSSEPDVVQAILSEVDLDDKDGRI SYEEFVMMRRGTDRWKASRQYS  
DRFNLSMRLLRDGSLNPPSYMSMSMR\*

HPWLQNAKKNPNVPLDAVRSRLKQFSAMNKLKRALQVIAEHLGGEEIDGLKEMFEKLDSDKTGTITFEKLMGLIEIGSQLTEHEVRMLMEAADVEGNG  
TLDYGEFVAATVHLQRLLDDHLRAAFDVFVDVDSGSIETEELEAREAVGEAMTELSSEPDVQVAILSEVLDLKDGRISYEEFVAMMRRTDWRKASRQYSR  
DRFNLSMLRLLRDGSLNPPSYSSMSMR\*

>Pp3c12\_190 Org\_Ppatens peptide: Pp3c12\_190V3.1.p (1 of 9) PTHR24349:SF81 - CALCIUM-DEPENDENT PROTEIN  
KINASE 20 (PAC:32975193)

MGNTECVGAAGYFQGFSAIALGGRSSRSNSERSPTASKIDSDRKEVEVDTPATQQNPPRQNHIPSVDTADQQQFKEVIEAMKKGREIKSVSGQSLTHSVL  
QRKTENLRDLYILGKGLGQGFQGTYYLCIEKATNKEYACKSIKRKLISKEDVEDVRRELQIMHHLSGHPNIVMIKAYEDPASVHLVMELCAGGELFDR  
IIQRGQYSEAKAAVLRTRTIVGVVETCHSLGVMHRDLKPENFLFSSTKEDAAKTTDFGLSVFFKPGEVFRDVGVSPIYVAPEVLRKNYGPVADVWSAGVI  
LYILLSGVPPFWAETEQQGIFEQVLKSELDFASDPWPKISDSAKDLIRKMLNPQASKRLKAHQVLCWPICEDGVAPDRPIDSAVQSRKLFHSAMNKLKKI  
AIRVIAESLSEEEIAGLKEMFKMMDTNSGSI SYDELKAGLKKVGSILKEEDIRQLMDAADVDGNGTIDYGEFLAATLHLNKKIERDENMLAAFSYLDKDN  
SGYLTIDELQHALAQFNMGDISVDELLHEVDQNNNDGQIDYAEFVMMRKNPGAAGRSSFRNSQSLSLNDVLMVG\*

>Pp3c12\_190 Org\_Ppatens peptide: Pp3c12\_190V3.2.p (1 of 9) PTHR24349:SF81 - CALCIUM-DEPENDENT PROTEIN  
KINASE 20 (PAC:32975194)

MGNTECVGAAGYFQGFSAIALGGRSSRSNSERSPTASKIDSDRKEVEVDTPATQQNPPRQNHIPSVDTADQQQFKEVIEAMKKGREIKSVSGQSLTHSVL  
QRKTENLRDLYILGKGLGQGFQGTYYLCIEKATNKEYACKSIKRKLISKEDVEDVRRELQIMHHLSGHPNIVMIKAYEDPASVHLVMELCAGGELFDR  
IIQRGQYSEAKAAVLRTRTIVGVVETCHSLGVMHRDLKPENFLFSSTKEDAAKTTDFGLSVFFKPGEVFRDVGVSPIYVAPEVLRKNYGPVADVWSAGVI  
LYILLSGVPPFWAETEQQGIFEQVLKSELDFASDPWPKISDSAKDLIRKMLNPQASKRLKAHQVLCWPICEDGVAPDRPIDSAVQSRKLFHSAMNKLKKI  
AIRVIAESLSEEEIAGLKEMFKMMDTNSGSI SYDELKAGLKKVGSILKEEDIRQLMDAADVDGNGTIDYGEFLAATLHLNKKIERDENMLAAFSYLDKDN  
SGYLTIDELQHALAQFNMGDISVDELLHEVDQNNNDGQIDYAEFVMMRKNPGAAGRSSFRNSQSLSLNDVLMVG\*

>Pp3c12\_21850 Org\_Ppatens peptide: Pp3c12\_21850V3.1.p (1 of 3) PTHR24349:SF95 - CALCIUM-DEPENDENT  
PROTEIN KINASE 3 (PAC:32973633)

MGNISGRPRKRNRGHTKGMNLGRPTDPRQKNESERPMYEGSTQRSSAVASSYGGGTQHKQDGSTPATGTHAEGGHAARPSGATPSEPPGMSAPM  
PRPRPTSYSANGVLGKPLVDIRQTYSLGRELGRGQFGVYTYLCTHKTGTTEILACKSIKRKLTTKEDVEDVKREVQIMHHLSGTPNIVDLKGVYEDRHSVH  
LVMELCAGGELFDRI IAKGHYSERAAADLCRIVNVVHRCHTLGVFHRDLKPENFLSSEAEDAQLKATDFGLSTFFKPGEVFHDIVGSAYVVAPEVLR  
NYGPEADVWSAGVIVYILLCGVPPFWAETEQQGIFDAVLRGHDIFVSDPWPKISSGAKDLVRKMLNMNVKERLTAQVNLNHPWMEEGGDASDTPLDNAVL  
RLKNFSTANKMKKLLALKVIAKNLSEEEIVGLRELFKSMPTDNSGMVTFEELKDGLLRQGSKLRESDIRELMEEAADVDGNGKIDFNEFISATMHHMNKLEME  
DHLFAAFSHFDTDGSGYITIDELQEAEMKNGMGDPQTIQEIINEVDTRDRGRIDYDEFVAMMRKNPITEDGGKHRHR\*

>Pp3c12\_21850 Org\_Ppatens peptide: Pp3c12\_21850V3.2.p (1 of 3) PTHR24349:SF95 - CALCIUM-DEPENDENT  
PROTEIN KINASE 3 (PAC:32973634)

MGNISGRPRKRNRGHTKGMNLGRPTDPRQKNESERPMYEGSTQRSSAVASSYGGGTQHKQDGSTPATGTHAEGGHAARPSGATPSEPPGMSAPM  
PRPRPTSYSANGVLGKPLVDIRQTYSLGRELGRGQFGVYTYLCTHKTGTTEILACKSIKRKLTTKEDVEDVKREVQIMHHLSGTPNIVDLKGVYEDRHSVH  
LVMELCAGGELFDRI IAKGHYSERAAADLCRIVNVVHRCHTLGVFHRDLKPENFLSSEAEDAQLKATDFGLSTFFKPGEVFHDIVGSAYVVAPEVLR  
NYGPEADVWSAGVIVYILLCGVPPFWAETEQQGIFDAVLRGHDIFVSDPWPKISSGAKDLVRKMLNMNVKERLTAQVNLNHPWMEEGGDASDTPLDNAVL  
RLKNFSTANKMKKLLALKVIAKNLSEEEIVGLRELFKSMPTDNSGMVTFEELKDGLLRQGSKLRESDIRELMEEAADVDGNGKIDFNEFISATMHHMNKLEME  
DHLFAAFSHFDTDGSGYITIDELQEAEMKNGMGDPQTIQEIINEVDTRDRGRIDYDEFVAMMRKNPITEDGGKHRHR\*

>Pp3c12\_21880 Org\_Ppatens peptide: Pp3c12\_21880V3.1.p (1 of 2) PTHR24349:SF23 - MAP KINASE-ACTIVATED  
PROTEIN KINASE 5 (PAC:32974473)

MGNSSGRPRDRSRKSGGGSGGSSQGSYPRNEGSYPRGSGHGGSTQPRGCNQQGGSTQPRGNSQQGGSTQPRGSGHGNAGGYRQAPKYTPPVKPKPVAPGF  
LGKPLSDILNSYTLGKELGRGEFGVYTYCTHKTDTNEVYACKTIAKRKLTHKDDIEDVKREVQIMHHLSGTLNIVTLKAVFEDKHNHLMELCAGGELFD  
RIVAKKCYSERAAADLCRIVNVVHRCHSLGVFHRDLKPENFLFSTMAEDAPLKATDFGLSTFFKPGERFQDLVGTAYYIAPEVLRKDYGPVADVWSAGV  
ILYILLCGVPPFWAETEQQGIFDAIMRGTLDFTSDPWPRISDDAKVLVKGMLNPDVNARLTAQQVLDHPWMKEDGASNAPLDNAVLTRLNKFSANKMKKL  
ALKVIAQNLSEEEIAGLRQLFKSIDVDNSGTVTLLELKEGLIKQGSKFSESDIAKLMESADLDGNGKIDFNEFISATMHHMNKLEKEDHLFAAFHHFDRDN  
SGYITVFELQQALEENGVDYDTIQEIIDEVDTDNDGRIDYDEFVAMMRKNPGAEEGEGKHNHRHRY\*

>Pp3c12\_21880 Org\_Ppatens peptide: Pp3c12\_21880V3.2.p (1 of 2) PTHR24349:SF23 - MAP KINASE-ACTIVATED  
PROTEIN KINASE 5 (PAC:32974474)

MGNSSGRPRDRSRKSGGGSGGSSQGSYPRNEGSYPRGSGHGGSTQPRGCNQQGGSTQPRGNSQQGGSTQPRGSGHGNAGGYRQAPKYTPPVKPKPVAPGF  
LGKPLSDILNSYTLGKELGRGEFGVYTYCTHKTDTNEVYACKTIAKRKLTHKDDIEDVKREVQIMHHLSGTLNIVTLKAVFEDKHNHLMELCAGGELFD  
RIVAKKCYSERAAADLCRIVNVVHRCHSLGVFHRDLKPENFLFSTMAEDAPLKATDFGLSTFFKPGERFQDLVGTAYYIAPEVLRKDYGPVADVWSAGV  
ILYILLCGVPPFWAETEQQGIFDAIMRGTLDFTSDPWPRISDDAKVLVKGMLNPDVNARLTAQQVLDHPWMKEDGASNAPLDNAVLTRLNKFSANKMKKL  
ALKVIAQNLSEEEIAGLRQLFKSIDVDNSGTVTLLELKEGLIKQGSKFSESDIAKLMESADLDGNGKIDFNEFISATMHHMNKLEKEDHLFAAFHHFDRDN  
SGYITVFELQQALEENGVDYDTIQEIIDEVDTDNDGRIDYDEFVAMMRKNPGAEEGEGKHNHRHRY\*

>Pp3c17\_2480 Org\_Ppatens peptide: Pp3c17\_2480V3.1.p (1 of 9) PTHR24349:SF81 - CALCIUM-DEPENDENT PROTEIN  
KINASE 20 (PAC:32905868)

MGNTECIGAAGYFQGFSAIAIALGGRSFTSNSEISPSAKADGRHKAGGDSSTATQQKAPRQNYIPSVATDQQEFRDVEAMRKGREIEPVPGQSLTHSVLQ  
RKTENLRDLYTLGKGLGQGFQGTYYLCIEKATSKKEYACKSIKRKLISKEDVEDVRRELQIMHHLSGHPNIVMIKAYEDPASVHLVMELCAGGELFDR  
IQRGHYSEAKAAVLRTRTIVGVVETCHSLGVMHRDLKPENFLFSSTKEDAAKTTDFGLSVFFKPGEVFRDVGVSPIYVAPEVLRKNYGPVADVWSAGVIL  
YILLCGVPPFWAETEQQGIFEQVLKSELDFATDPWPKISDSAKDLIRKMLNPEASRKMKAHVLCWPICEDGVAPDRPIDSAVQSRKLFHSAMNKLKIIA  
IRVIAESLSEEEIAGLKEMFKMMDADNSGSI SYEELKEGLKKVGSILKEEDMRQLMDAADVDGNGTIDYGEFLAATLHLNKKIERDENMLAAFSYLDKDKS  
GYLTVDEVQHALAEFRMGDLSVDELLREVDQNNNDGRIDYAEFVAMMRKNGTGGAGRSSLRNSQSLSLNDVLMVG\*

>Pp3c17\_2480 Org\_Ppatens peptide: Pp3c17\_2480V3.2.p (1 of 9) PTHR24349:SF81 - CALCIUM-DEPENDENT PROTEIN  
KINASE 20 (PAC:32905869)

MGNTECIGAAGYFQGFSAIAIALGGRSFTSNSEISPSAKADGRHKAGGDSSTATQQKAPRQNYIPSVATDQQEFRDVEAMRKGREIEPVPGQSLTHSVLQ  
RKTENLRDLYTLGKGLGQGFQGTYYLCIEKATSKKEYACKSIKRKLISKEDVEDVRRELQIMHHLSGHPNIVMIKAYEDPASVHLVMELCAGGELFDR  
IQRGHYSEAKAAVLRTRTIVGVVETCHSLGVMHRDLKPENFLFSSTKEDAAKTTDFGLSVFFKPGEVFRDVGVSPIYVAPEVLRKNYGPVADVWSAGVIL  
YILLCGVPPFWAETEQQGIFEQVLKSELDFATDPWPKISDSAKDLIRKMLNPEASRKMKAHVLCWPICEDGVAPDRPIDSAVQSRKLFHSAMNKLKIIA

IRVIAESLSEEEIAGLKEMFKMMDADNSGSI SYEELKEGLKVKVGSILKEEDMRQLMDAADVDGNGTIDYGEFLAATLHLNKKIERDENMLAAFSYLDKDKS  
GYLTVDEVQHAALEFRMGDLSDVDELLREVDQNNDRIDYAEFVAMMRKGNTEGGAGRSSLRNSQSLSLNDVLMVG\*  
>Pp3c17\_2480 Org\_Ppatens peptide: Pp3c17\_2480V3.3.p (1 of 9) PTHR24349:SF81 - CALCIUM-DEPENDENT PROTEIN  
KINASE 20 (PAC:32905870)  
MGNTCIGAAGYFQGFSAAIAGLGRSFTSNSEISPSAKADGRHKAGGDSSTATQQKAPRQNYIPSV EATDQQEFRDVI EAMRKGREIEPVPGQSLTHSVLQ  
RKTEENLRDLYTLGKGLGQGFQGTYYLCIEKATSKEYACKSI AKRKLISKEDVEDVRRELQIMHHLSGHPNIVMIK GAYEDPASVHVLVME LCAGGELFDRI  
IQRGHYSEAKAAIIRTIVGVVETCHSLGVMHRDLKPENFLFSSTKEDAALKTTDFGLSVFFKPGEIFRVDVVGSPYYVAPEVLRKNYGPEADVWSAGVIL  
YILLCGVPPFWAETEQQGIFEQVLKSELDFATDPWPKISDSAKDLIRKMLNPEASKRMAHVVLCHPWICEDGVAPDRPIDSAVQSRLLKHFSA MNKLLKIA  
IRVIAESLSEEEIAGLKEMFKMMDADNSGSI SYEELKEGLKVKVGSILKEEDMRQLMDAADVDGNGTIDYGEFLAATLHLNKKIERDENMLAAFSYLDKDKS  
GYLTVDEVQHAALEFRMGDLSDVDELLREVDQNNDRIDYAEFVAMMRKGNTEGGAGRSSLRNSQSLSLNDVLMVG\*  
>Pp3c17\_2480 Org\_Ppatens peptide: Pp3c17\_2480V3.4.p (1 of 9) PTHR24349:SF81 - CALCIUM-DEPENDENT PROTEIN  
KINASE 20 (PAC:32905871)  
MGNTCIGAAGYFQGFSAAIAGLGRSFTSNSEISPSAKADGRHKAGGDSSTATQQKAPRQNYIPSV EATDQQEFRDVI EAMRKGREIEPVPGQSLTHSVLQ  
RKTEENLRDLYTLGKGLGQGFQGTYYLCIEKATSKEYACKSI AKRKLISKEDVEDVRRELQIMHHLSGHPNIVMIK GAYEDPASVHVLVME LCAGGELFDRI  
IQRGHYSEAKAAIIRTIVGVVETCHSLGVMHRDLKPENFLFSSTKEDAALKTTDFGLSVFFKPGEIFRVDVVGSPYYVAPEVLRKNYGPEADVWSAGVIL  
YILLCGVPPFWAETEQQGIFEQVLKSELDFATDPWPKISDSAKDLIRKMLNPEASKRMAHVVLCHPWICEDGVAPDRPIDSAVQSRLLKHFSA MNKLLKIA  
IRVIAESLSEEEIAGLKEMFKMMDADNSGSI SYEELKEGLKVKVGSILKEEDMRQLMDAADVDGNGTIDYGEFLAATLHLNKKIERDENMLAAFSYLDKDKS  
GYLTVDEVQHAALEFRMGDLSDVDELLREVDQNNDRIDYAEFVAMMRKGNTEGGAGRSSLRNSQSLSLNDVLMVG\*  
>Pp3c17\_2480 Org\_Ppatens peptide: Pp3c17\_2480V3.5.p (1 of 9) PTHR24349:SF81 - CALCIUM-DEPENDENT PROTEIN  
KINASE 20 (PAC:32905872)  
MGNTCIGAAGYFQGFSAAIAGLGRSFTSNSEISPSAKADGRHKAGGDSSTATQQKAPRQNYIPSV EATDQQEFRDVI EAMRKGREIEPVPGQSLTHSVLQ  
RKTEENLRDLYTLGKGLGQGFQGTYYLCIEKATSKEYACKSI AKRKLISKEDVEDVRRELQIMHHLSGHPNIVMIK GAYEDPASVHVLVME LCAGGELFDRI  
IQRGHYSEAKAAIIRTIVGVVETCHSLGVMHRDLKPENFLFSSTKEDAALKTTDFGLSVFFKPGEIFRVDVVGSPYYVAPEVLRKNYGPEADVWSAGVIL  
YILLCGVPPFWAETEQQGIFEQVLKSELDFATDPWPKISDSAKDLIRKMLNPEASKRMAHVVLCHPWICEDGVAPDRPIDSAVQSRLLKHFSA MNKLLKIA  
IRVIAESLSEEEIAGLKEMFKMMDADNSGSI SYEELKEGLKVKVGSILKEEDMRQLMDAADVDGNGTIDYGEFLAATLHLNKKIERDENMLAAFSYLDKDKS  
GYLTVDEVQHAALEFRMGDLSDVDELLREVDQNNDRIDYAEFVAMMRKGNTEGGAGRSSLRNSQSLSLNDVLMVG\*  
>Pp3c20\_12010 Org\_Ppatens peptide: Pp3c20\_12010V3.1.p (1 of 5) PTHR24349//PTHR24349:SF135 -  
SERINE/THREONINE-PROTEIN KINASE // SUBFAMILY NOT NAMED (PAC:32946771)  
MAKSPPPNSIQMSAVLDHRGSNVI PHDLISSLDRESNLVNLKVGYNKAELELSPGSSCSPDNTPRVAVEKKPEVKYTTQNSKQVEGVIQAIKASDNKDQ  
KKGKLTVCVLQHVTEVDVRYTLGKGLGAGNFGITYLCTEKSTGDDYACTI SKKLLKSKDDVADVRKELQIMHHLSGHPNIVAIKGA FEDEASVHFVME  
LCAGGELFTRITEKHYSEAAAAAMRTIVSVIETCHILGVIHRDLKPENFLLLNKREDSPLKATDFGLSTFFKPGEVCKDVGVSFAFYVAPEVLRKRYGP  
ESDIWSAGVILYILLSGVPPFWADTEDGIFAEVLKAKVDFDTPWPKISKDAKDLIRKILNPDVKARLTASEVLAHPWVREKGVASTKPMDSVQNRLLK  
FAAMNKMKLAVRVIAQSMSEEEIAGLRNIFKIMDVGDSGTITFEELKQGLQKVGSNMREADVDRDLMDAADVDKNGTIDYGEFLAATINMNKVEREENML  
AAFRYLDKDNNGYITGEEELQNACAEFNMGMENLEDLMRDVLNDNDGRIDYQEFVAMMRKGTGTAPPQRGARMEPSFGFSAALQL\*  
>Pp3c20\_12010 Org\_Ppatens peptide: Pp3c20\_12010V3.2.p (1 of 5) PTHR24349//PTHR24349:SF135 -  
SERINE/THREONINE-PROTEIN KINASE // SUBFAMILY NOT NAMED (PAC:32946772)  
MNPQQLCSSLFI RIGLSLSQSSCSPDNTPRVAVEKKPEVKYTTQNSKQVEGVIQAIKASDNKDQKKGKLTVCVLQHVTEVDVRYTLGKGLGAGNFGI  
TYLCTEKSTGDDYACTI SKKLLKSKDDVADVRKELQIMHHLSGHPNIVAIKGA FEDEASVHFVME LCAGGELFTRITEKHYSEAAAAAMRTIVSVIE  
TCHILGVIHRDLKPENFLLLNKREDSPLKATDFGLSTFFKPGEVCKDVGVSFAFYVAPEVLRKRYGPESDIWSAGVILYILLSGVPPFWADTEDGIFAEVL  
KAKVDFDTPWPKISKDAKDLIRKILNPDVKARLTASEVLAHPWVREKGVASTKPMDSVQNRLLKFAAMNKMKLAVRVIAQSMSEEEIAGLRNIFKIM  
DVGDSGTITFEELKQGLQKVGSNMREADVDRDLMDAADVDKNGTIDYGEFLAATINMNKVEREENMLAAFRYLDKDNNGYITGEEELQNACAEFNMGMENLE  
DLMRDVLNDNDGRIDYQEFVAMMRKGTGTAPPQRGARMEPSFGFSAALQL\*  
>Pp3c20\_4100 Org\_Ppatens peptide: Pp3c20\_4100V3.1.p (1 of 9) PTHR24349:SF81 - CALCIUM-DEPENDENT PROTEIN  
KINASE 20 (PAC:32945505)  
MGNTCVGAASKAGFFFPQEGGSPSPSVTPKGTQPEEPAKPNPNSPEERRKSGAGVEQEARAELKPLSLTIQAPAVIRIAPT VYPSAANRRQENCVVP  
AMRRAGLNLI PGLSFTHSVLQRQ TENNKDLYRLERKLGQGFQGTYYLCVEKATGREYACKSI AKRKLISQEDVDVDRRELHIMHHLSGHPNIVTIK GAYE  
DQMAVHVLVME LCAGGELFDRI IQRGHYSEAAAE LCRVIVGVVETCHSLGVMHRDLKPENFLSDQSEGAALKTTDFGLSVFFKPGEVFTDVGVS PYYVA  
PEVLRKHYGPEADVWSAGVILYILLSGVPPFWAETEQQGIFEQVLKSELDFVSEPWPSISDSAKDLIRRLM LDPNAKRRLKAHQVLSHPWIGEEGVAPDRPM  
DPAVQSRLLKQFSAMNKLLKVAIRVIAELLSEEEIAGLREMFKIMDTHSGTITFEELKSGLERVGSNLVSEIRQLMDAADVDQNGTIDYGEFLAATLHL  
NKIEREENLFAAFSWLDKDNNGYITVDELQACSKYNMGETSIEDLIREVDQDNDGRIDYNEFVTMMRKGNGAVGR TTRLNLSLSDALMNPQ\*  
>Pp3c20\_4100 Org\_Ppatens peptide: Pp3c20\_4100V3.2.p (1 of 9) PTHR24349:SF81 - CALCIUM-DEPENDENT PROTEIN  
KINASE 20 (PAC:32945506)  
MGNTCVGAASKAGFFFPQEGGSPSPSVTPKGTQPEEPAKPNPNSPEERRKSGAGVEQEARAELKPLSLTIQAPAVIRIAPT VYPSAANRRQENCVVP  
AMRRAGLNLI PGLSFTHSVLQRQ TENNKDLYRLERKLGQGFQGTYYLCVEKATGREYACKSI AKRKLISQEDVDVDRRELHIMHHLSGHPNIVTIK GAYE  
DQMAVHVLVME LCAGGELFDRI IQRGHYSEAAAE LCRVIVGVVETCHSLGVMHRDLKPENFLSDQSEGAALKTTDFGLSVFFKPGEVFTDVGVS PYYVA  
PEVLRKHYGPEADVWSAGVILYILLSGVPPFWAETEQQGIFEQVLKSELDFVSEPWPSISDSAKDLIRRLM LDPNAKRRLKAHQVLSHPWIGEEGVAPDRPM  
DPAVQSRLLKQFSAMNKLLKVAIRVIAELLSEEEIAGLREMFKIMDTHSGTITFEELKSGLERVGSNLVSEIRQLMDAADVDQNGTIDYGEFLAATLHL  
NKIEREENLFAAFSWLDKDNNGYITVDELQACSKYNMGETSIEDLIREVDQDNDGRIDYNEFVTMMRKGNGAVGR TTRLNLSLSDALMNPQ\*  
>Pp3c20\_4170 Org\_Ppatens peptide: Pp3c20\_4170V3.1.p (1 of 9) PTHR24349:SF81 - CALCIUM-DEPENDENT PROTEIN  
KINASE 20 (PAC:32948019)  
MGNTCVGAASKAGFFFPQEGRSPSPSVTPKGTQPEEPAKPNPNSPEERRKSGAGVEQEARAELKPLSLTIQAPAVIRIAPT VYPSAANRRQENCVVP  
AMRRAGLNLI PGLSFTHSVLQRQ TENNKDLYRLGRKLGQGFQGTYYLCVEKATGREYACKSI AKRKLISQEDVDVDRRELHIMHHLSGHPNIVTIK GAYE  
DQMAVHVLVME LCAGGELFDRI IQRGHYSEAAAE LCRVIVGVVETCHSLGVMHRDLKPENFLSDQSEGAALKTTDFGLSVFFKPGEVFTDVGVS PYYVA  
PEVLRKHYGPEADVWSAGVILYILLSGVPPFWAETEQQGIFEQVLKSELDFVSEPWPSISDSAKDLIRRLM LDPNAKRRLKAHQVLSHPWIGEEGVAPDRPM  
DPAVQSRLLKQFSAMNKLLKVAIRVIAELLSEEEIAGLREMFKIMDTHSGTITFEELKSGLERVGSNLVSEIRQLMDAADVDQNGTIDYGEFLAATLHL

NKIEREENLFAAFSWLKDNDKNSGYLTVDELQQACSKYNMGETSIEDLIREVDQDNDGRIDYNEFVMMMRKNGAVGRTTLRNSLSLSDALMNPQ\*  
>Pp3c20\_4170 Org\_Ppatens peptide: Pp3c20\_4170V3.2.p (1 of 9) PTHR24349:SF81 - CALCIUM-DEPENDENT PROTEIN KINASE 20 (PAC:32948021)  
MRRAGLNLI PGLSFTHSVLQRQNTENLKDLYTLGRKLGQGGQFGTTYLCVEKATGREYACKSI AKRKLISQEDVDDVREHIMHHL SGHPNIVTIK GAYED  
QMAVHLMELCAGGELFDRI IQRGHYSEAQAELCRVIVGVVETCHSLGVMHRDLKPENFLLSDQSEGAALKTTDFGLSVFFKPGEVFTDVGSPYYVAP  
EVL RKHYGPEADVWSAGVILY ILLSGVPPFWAETE QGIFEQVLK GELDFVSEPWPSISDSAKDLIRRMLDPNAKRRLKAHQVLSHPWIGEEGVAPDRPMD  
PAVQSRKQFSAMNKLKVAIRVIAEELLSEEEIAGLREMPFKMIDTDHSGTITFEELKSGLERVGSNLVESEIRQLMDAADVDQNGTIDYGEFLAATLHLN  
KIEREENLFAAFSWLKDNDKNSGYLTVDELQQACSKYNMGETSIEDLIREVDQDNDGRIDYNEFVMMMRKNGAVGRTTLRNSLSLSDALMNPQ\*  
>Pp3c20\_4170 Org\_Ppatens peptide: Pp3c20\_4170V3.3.p (1 of 9) PTHR24349:SF81 - CALCIUM-DEPENDENT PROTEIN KINASE 20 (PAC:32948020)  
MGNTCVGAASKAGFFFPQERGSFVSPTPKGTQPEEPAKPNNPSPPEERRKSGAGVEQEARAELKQSLSLTIQAPAVIRIAPTVPYPSAANRRQENCVVP  
AMRRAGLNLI PGLSFTHSVLQRQNTENLKDLYTLGRKLGQGGQFGTTYLCVEKATGREYACKSI AKRKLISQEDVDDVREHIMHHL SGHPNIVTIK GAYE  
DQMAVHLMELCAGGELFDRI IQRGHYSEAQAELCRVIVGVVETCHSLGVMHRDLKPENFLLSDQSEGAALKTTDFGLSVFFKPGEVFTDVGSPYYVA  
PEVLRKHGPEADVWSAGVILY ILLSGVPPFWAETE QGIFEQVLK GELDFVSEPWPSISDSAKDLIRRMLDPNAKRRLKAHQVLSHPWIGEEGVAPDRPMD  
DPAVQSRKQFSAMNKLKVAIRVIAEELLSEEEIAGLREMPFKMIDTDHSGTITFEELKSGLERVGSNLVESEIRQLMDAADVDQNGTIDYGEFLAATLHLN  
NKIEREENLFAAFSWLKDNDKNSGYLTVDELQQACSKYNMGETSIEDLIREVDQDNDGRIDYNEFVMMMRKNGAVGRTTLRNSLSLSDALMNPQ\*  
>Pp3c23\_18880 Org\_Ppatens peptide: Pp3c23\_18880V3.1.p (1 of 9) PTHR24349:SF81 - CALCIUM-DEPENDENT PROTEIN KINASE 20 (PAC:32950805)  
MRRGVNLVPGQSFTHSVLQRQNTENLKDLYTLGRKLGQGGQFGTTYLCVEKATGREYACKSI AKRKLISQEDVDDVREHIMHHL SGHPNIVTIK GAYEDQ  
VSVHLMELCAGGELFDRI IQRGHYSEAQAELCRVIVGVVETCHSLGVMHRDLKPENFLLSDPSENAALKTTDFGLSVFFKPGEVFTDVGSPYYVAPE  
VLRKHGPEADVWSAGVILY ILLSGVPPFWAETE QGIFEQVLK GELDFVSEPWPSISDSAKDLIRRMLDPNAKRRLKAHQVLSHPWIREAGVAPDRPMDP  
AVQSRKQFSAMNKLKVAIRVIAEFLSEEEIAGLREMPFKMIDTDHSGSITFEELKSGLERVGSNLVESEIRQLMDAADVDQNGTIDYGEFLAATLHLNK  
IEREENLFAAFSWLKDNDKNSGYLTVDELQACSEYNI GDTSIEELIREVDQDNDGRIDYNEFVTMMRKNGTIVGRATLRNSLSLSDALMHTN\*  
>Pp3c23\_18880 Org\_Ppatens peptide: Pp3c23\_18880V3.2.p (1 of 9) PTHR24349:SF81 - CALCIUM-DEPENDENT PROTEIN KINASE 20 (PAC:32950806)  
MRRGVNLVPGQSFTHSVLQRQNTENLKDLYTLGRKLGQGGQFGTTYLCVEKATGREYACKSI AKRKLISQEDVDDVREHIMHHL SGHPNIVTIK GAYEDQ  
VSVHLMELCAGGELFDRI IQRGHYSEAQAELCRVIVGVVETCHSLGVMHRDLKPENFLLSDPSENAALKTTDFGLSVFFKPGEVFTDVGSPYYVAPE  
VLRKHGPEADVWSAGVILY ILLSGVPPFWAETE QGIFEQVLK GELDFVSEPWPSISDSAKDLIRRMLDPNAKRRLKAHQVLSHPWIREAGVAPDRPMDP  
AVQSRKQFSAMNKLKVAIRVIAEFLSEEEIAGLREMPFKMIDTDHSGSITFEELKSGLERVGSNLVESEIRQLMDAADVDQNGTIDYGEFLAATLHLNK  
IEREENLFAAFSWLKDNDKNSGYLTVDELQACSEYNI GDTSIEELIREVDQDNDGRIDYNEFVTMMRKNGTIVGRATLRNSLSLSDALMHTN\*  
>Pp3c23\_18880 Org\_Ppatens peptide: Pp3c23\_18880V3.3.p (1 of 9) PTHR24349:SF81 - CALCIUM-DEPENDENT PROTEIN KINASE 20 (PAC:32950804)  
MRRGVNLVPGQSFTHSVLQRQNTENLKDLYTLGRKLGQGGQFGTTYLCVEKATGREYACKSI AKRKLISQEDVDDVREHIMHHL SGHPNIVTIK GAYEDQ  
VSVHLMELCAGGELFDRI IQRGHYSEAQAELCRVIVGVVETCHSLGVMHRDLKPENFLLSDPSENAALKTTDFGLSVFFKPGEVFTDVGSPYYVAPE  
VLRKHGPEADVWSAGVILY ILLSGVPPFWAETE QGIFEQVLK GELDFVSEPWPSISDSAKDLIRRMLDPNAKRRLKAHQVLSHPWIREAGVAPDRPMDP  
AVQSRKQFSAMNKLKVAIRVIAEFLSEEEIAGLREMPFKMIDTDHSGSITFEELKSGLERVGSNLVESEIRQLMDAADVDQNGTIDYGEFLAATLHLNK  
IEREENLFAAFSWLKDNDKNSGYLTVDELQACSEYNI GDTSIEELIREVDQDNDGRIDYNEFVTMMRKNGTIVGRATLRNSLSLSDALMHTN\*  
>Pp3c23\_18930 Org\_Ppatens peptide: Pp3c23\_18930V3.1.p (1 of 9) PTHR24349:SF81 - CALCIUM-DEPENDENT PROTEIN KINASE 20 (PAC:32950555)  
MRRGVNLVPGQSFTHSVLQRQNTENLKDLYTLGRKLGQGGQFGTTYLCVEKATGREYACKSI AKRKLISQEDVDDVREHIMHHL SGHPNIVTIK GAYEDQ  
VSVHLMELCAGGELFDRI IQRGHYSEAQAELCRVIVGVVETCHSLGVMHRDLKPENFLLSDPSENAALKTTDFGLSVFFKPGEVFTDVGSPYYVAPE  
VLRKHGPEADVWSAGVILY ILLSGVPPFWAETE QGIFEQVLK GELDFVSEPWPSISDSAKDLIRRMLDPNAKRRLKAHQVLSHPWIREAGVAPDRPMDP  
AVQSRKQFSAMNKLKVAIRVIAEFLSEEEIAGLREMPFKMIDTDHSGSITFEELKSGLERVGSNLVESEIRQLMDAADVDQNGTIDYGEFLAATLHLNK  
IEREENLFAAFSWLKDNDKNSGYLTVDELQACSEYNI GDTSIEELIREVDQDNDGRIDYNEFVTMMRKNGTIVGRATLRNSLSLSDALMHTN\*  
>Pp3c23\_18930 Org\_Ppatens peptide: Pp3c23\_18930V3.2.p (1 of 9) PTHR24349:SF81 - CALCIUM-DEPENDENT PROTEIN KINASE 20 (PAC:32950556)  
MRRGVNLVPGQSFTHSVLQRQNTENLKDLYTLGRKLGQGGQFGTTYLCVEKATGREYACKSI AKRKLISQEDVDDVREHIMHHL SGHPNIVTIK GAYEDQ  
VSVHLMELCAGGELFDRI IQRGHYSEAQAELCRVIVGVVETCHSLGVMHRDLKPENFLLSDPSENAALKTTDFGLSVFFKPGEVFTDVGSPYYVAPE  
VLRKHGPEADVWSAGVILY ILLSGVPPFWAETE QGIFEQVLK GELDFVSEPWPSISDSAKDLIRRMLDPNAKRRLKAHQVLSHPWIREAGVAPDRPMDP  
AVQSRKQFSAMNKLKVAIRVIAEFLSEEEIAGLREMPFKMIDTDHSGSITFEELKSGLERVGSNLVESEIRQLMDAADVDQNGTIDYGEFLAATLHLNK  
IEREENLFAAFSWLKDNDKNSGYLTVDELQACSEYNI GDTSIEELIREVDQDNDGRIDYNEFVTMMRKNGTIVGRATLRNSLSLSDALMHTN\*  
>Pp3c23\_18930 Org\_Ppatens peptide: Pp3c23\_18930V3.3.p (1 of 9) PTHR24349:SF81 - CALCIUM-DEPENDENT PROTEIN KINASE 20 (PAC:32950557)  
MRRGVNLVPGQSFTHSVLQRQNTENLKDLYTLGRKLGQGGQFGTTYLCVEKATGREYACKSI AKRKLISQEDVDDVREHIMHHL SGHPNIVTIK GAYEDQ  
VSVHLMELCAGGELFDRI IQRGHYSEAQAELCRVIVGVVETCHSLGVMHRDLKPENFLLSDPSENAALKTTDFGLSVFFKPGEVFTDVGSPYYVAPE  
VLRKHGPEADVWSAGVILY ILLSGVPPFWAETE QGIFEQVLK GELDFVSEPWPSISDSAKDLIRRMLDPNAKRRLKAHQVLSHPWIREAGVAPDRPMDP  
AVQSRKQFSAMNKLKVAIRVIAEFLSEEEIAGLREMPFKMIDTDHSGSITFEELKSGLERVGSNLVESEIRQLMDAADVDQNGTIDYGEFLAATLHLNK  
IEREENLFAAFSWLKDNDKNSGYLTVDELQACSEYNI GDTSIEELIREVDQDNDGRIDYNEFVTMMRKNGTIVGRATLRNSLSLSDALMHTN\*  
>Pp3c3\_37890 Org\_Ppatens peptide: Pp3c3\_37890V3.1.p (1 of 2) PTHR24349:SF23 - MAP KINASE-ACTIVATED PROTEIN KINASE 5 (PAC:32944916)  
MGNTSSRGRSRKSTRQVNQGVGSDTREKNDVSNPKTRQGGVSGANNYGKPPSSGAQAGERSTAPAAALPRPKPASRSVSGVLGKPLSDIRQSYILGRELGRGQFGVYTLCTDKMTNEAYACKSI AKRKLTSKEDI EDVKREVQIMHHLSGTPNIVVLKDV FEDKHSVHLMELCAGGELFDRI IAKGHYSEARAADMCRV  
IVNVVHRCHSLGVFHRDLKPENFLASKAEDAPLKD TDFGLSTFFKPGDFVQDIVGSAYVAPEVLKRSYGP EADVWSAGVIVY ILLCGVPPFWAETE QG  
IFDVA LKGHIDFENDFPWPKPSNGAKDLVRRMLNPNVKIRLTAQQVLNHPMKEDGAPDVPDLDNAVLTRLNKNSAANKMKKALAKVIAESLSEEEIVGLR

EMFKSIDTNSGTVTFEELKEGLLKQGSKLNESDIRKLEMAADVGNKIDFNEFISATMHMNKTEKEDHLWAAFMHFDTDNSGYITIDELQEAMEKNGM  
GDPEITQEIISEVDTDNDGRIDYDEFVAMMRKGNPGAENGGTVNKRHR\*

>Pp3c3\_37890 Org\_Ppatens peptide: Pp3c3\_37890V3.2.p (1 of 2) PTHR24349:SF23 - MAP KINASE-ACTIVATED  
PROTEIN KINASE 5 (PAC:32944917)

MGNSTSSRGRKSTRQVNVQGVSGDTRKNDVSNPKTRQGGVSGANNYGGKPSGAQAGERSTSAAPALPRPKPASRSVSGVLGKPLSDIRQSYILGREL  
RGQFGVYTLCTDKMTNEAYACKSIARKRLTSKEDIEDVKREVQIMHHLSTGPNIVLKDVFEDKHSVHLMELCAGGELFDRIIAKGHYSERAAADMCRV  
IVNVVHRCHSLGVFHRDLKPEENFLASKAEDAPLKATDFGLSTFFKPGDVFQDIVGSAYVAPEVLKRSYGPEADVWSAGVIVYILLCGVPPFWAETEQQ  
IFDAVLKGHIDFENDPWPKISNGAKDLVRKMLNPNVKIRLTAQQVNLNHPWMKEDGAPDVLNDAVLTRLNKNSAANKMKLALKVAESLSEEEIVGLR  
EMFKSIDTNSGTVTFEELKEGLLKQGSKLNESDIRKLEMAADVGNKIDFNEFISATMHMNKTEKEDHLWAAFMHFDTDNSGYITIDELQEAMEKNGM  
GDPEITQEIISEVDTDNDGRIDYDEFVAMMRKGNPGAENGGTVNKRHR\*

>Pp3c3\_37890 Org\_Ppatens peptide: Pp3c3\_37890V3.4.p (1 of 2) PTHR24349:SF23 - MAP KINASE-ACTIVATED  
PROTEIN KINASE 5 (PAC:32944918)

MGNSTSSRGRKSTRQVNVQGVSGDTRKNDVSNPKTRQGGVSGANNYGGKPSGAQAGERSTSAAPALPRPKPASRSVSGVLGKPLSDIRQSYILGREL  
RGQFGVYTLCTDKMTNEAYACKSIARKRLTSKEDIEDVKREVQIMHHLSTGPNIVLKDVFEDKHSVHLMELCAGGELFDRIIAKGHYSERAAADMCRV  
IVNVVHRCHSLGVFHRDLKPEENFLASKAEDAPLKATDFGLSTFFKPGDVFQDIVGSAYVAPEVLKRSYGPEADVWSAGVIVYILLCGVPPFWAETEQQ  
IFDAVLKGHIDFENDPWPKISNGAKDLVRKMLNPNVKIRLTAQQVNLNHPWMKEDGAPDVLNDAVLTRLNKNSAANKMKLALKVAESLSEEEIVGLR  
EMFKSIDTNSGTVTFEELKEGLLKQGSKLNESDIRKLEMAADVGNKIDFNEFISATMHMNKTEKEDHLWAAFMHFDTDNSGYITIDELQEAMEKNGM  
GDPEITQEIISEVDTDNDGRIDYDEFVAMMRKGNPGAENGGTVNKRHR\*

>Pp3c3\_37890 Org\_Ppatens peptide: Pp3c3\_37890V3.5.p (1 of 2) PTHR24349:SF23 - MAP KINASE-ACTIVATED  
PROTEIN KINASE 5 (PAC:32944919)

MGNSTSSRGRKSTRQVNVQGVSGDTRKNDVSNPKTRQGGVSGANNYGGKPSGAQAGERSTSAAPALPRPKPASRSVSGVLGKPLSDIRQSYILGREL  
RGQFGVYTLCTDKMTNEAYACKSIARKRLTSKEDIEDVKREVQIMHHLSTGPNIVLKDVFEDKHSVHLMELCAGGELFDRIIAKGHYSERAAADMCRV  
IVNVVHRCHSLGVFHRDLKPEENFLASKAEDAPLKATDFGLSTFFKPGDVFQDIVGSAYVAPEVLKRSYGPEADVWSAGVIVYILLCGVPPFWAETEQQ  
IFDAVLKGHIDFENDPWPKISNGAKDLVRKMLNPNVKIRLTAQQVNLNHPWMKEDGAPDVLNDAVLTRLNKNSAANKMKLALKVAESLSEEEIVGLR  
EMFKSIDTNSGTVTFEELKEGLLKQGSKLNESDIRKLEMAADVGNKIDFNEFISATMHMNKTEKEDHLWAAFMHFDTDNSGYITIDELQEAMEKNGM  
GDPEITQEIISEVDTDNDGRIDYDEFVAMMRKGNPGAENGGTVNKRHR\*

>Pp3c4\_7390 Org\_Ppatens peptide: Pp3c4\_7390V3.1.p (1 of 5) PTHR24349//PTHR24349:SF135 -  
SERINE/THREONINE-PROTEIN KINASE // SUBFAMILY NOT NAMED (PAC:32919729)

MAAPRPRSVSNVGLKPLVDIRQTYSLGKELGRGQFGVYTLCTHKETGEKLACKSIARKKLIKEDIEDVKREVQIMHHLSTGPNIVDLKGVYEDRHSV  
HLVMECLCAGGELFDRIIAKGHYSERAAADLCRVIVNVVHRCHSLGVFHRDLKPEENFLASKAEDAPLQATDFGLSTFFKLGVEVFRDIVGSAYVAPEVLK  
RNYGPEADVWSAGVIVYILLCGVPPFWAEESEQGFDAVLKGHIDFESEPWPRISGAVDLVRNMLNPNVKERLTAYQVNLNHPWMQEGGDASDEPLDNLAVL  
DRLKNFSAANKMKLALKVIANSLSSEEEIVGLRELKFSMDTDNSGMVTFEELKQGLIRQGTGLKEADIRKLEMAADVGNKIDFHEFISATMHMNKTEK  
EDHLWAAFKHFDTDNSGYITHEELQEALENSGMGDPQAIQEI IREVDTDNDGKIDYDEFVAMMRKGNPDTEDGVMVPPRHR\*

>Pp3c4\_7390 Org\_Ppatens peptide: Pp3c4\_7390V3.2.p (1 of 5) PTHR24349//PTHR24349:SF135 -  
SERINE/THREONINE-PROTEIN KINASE // SUBFAMILY NOT NAMED (PAC:32919722)

MGNVSGRQSKNRGQQGGMSQEGSADTRFKSESERPRAEQNSQRSSATSSSRGASTHPNQGSARPASTGSAHTGSAHNASTHNNQGGSTRPASTGSTHTG  
SSHNASTHSNQQGSTRPASTGSSHGSESGHSARPSSGTAPAERPRVPMAPRPRSVSNVGLKPLVDIRQTYSLGKELGRGQFGVYTLCTHKETGEKLAC  
KSIARKKLIKEDIEDVKREVQIMHHLSTGPNIVDLKGVYEDRHSVHLMELCAGGELFDRIIAKGHYSERAAADLCRVIVNVVHRCHSLGVFHRDLKPE  
NFLASKAEDAPLQATDFGLSTFFKLGVEVFRDIVGSAYVAPEVLKRSYGPEADVWSAGVIVYILLCGVPPFWAEESEQGFDAVLKGHIDFESEPWPRIS  
SGAVDLVRNMLNPNVKERLTAYQVNLNHPWMQEGGDASDEPLDNLAVLDRLNKNSAANKMKLALKVIANSLSSEEEIVGLRELKFSMDTDNSGMVTFEELKQ  
GLIRQGTGLKEADIRKLEMAADVGNKIDFHEFISATMHMNKTEKEDHLWAAFKHFDTDNSGYITHEELQEALENSGMGDPQAIQEI IREVDTDNDGKI  
DYDEFVAMMRKGNPDTEDGVMVPPRHR\*

>Pp3c4\_7390 Org\_Ppatens peptide: Pp3c4\_7390V3.3.p (1 of 5) PTHR24349//PTHR24349:SF135 -  
SERINE/THREONINE-PROTEIN KINASE // SUBFAMILY NOT NAMED (PAC:32919723)

MGNVSGRQSKNRGQQGGMSQEGSADTRFKSESERPRAEQNSQRSSATSSSRGASTHPNQGSARPASTGSAHTGSAHNASTHNNQGGSTRPASTGSTHTG  
SSHNASTHSNQQGSTRPASTGSSHGSESGHSARPSSGTAPAERPRVPMAPRPRSVSNVGLKPLVDIRQTYSLGKELGRGQFGVYTLCTHKETGEKLAC  
KSIARKKLIKEDIEDVKREVQIMHHLSTGPNIVDLKGVYEDRHSVHLMELCAGGELFDRIIAKGHYSERAAADLCRVIVNVVHRCHSLGVFHRDLKPE  
NFLASKAEDAPLQATDFGLSTFFKLGVEVFRDIVGSAYVAPEVLKRSYGPEADVWSAGVIVYILLCGVPPFWAEESEQGFDAVLKGHIDFESEPWPRIS  
SGAVDLVRNMLNPNVKERLTAYQVNLNHPWMQEGGDASDEPLDNLAVLDRLNKNSAANKMKLALKVIANSLSSEEEIVGLRELKFSMDTDNSGMVTFEELKQ  
GLIRQGTGLKEADIRKLEMAADVGNKIDFHEFISATMHMNKTEKEDHLWAAFKHFDTDNSGYITHEELQEALENSGMGDPQAIQEI IREVDTDNDGKI  
DYDEFVAMMRKGNPDTEDGVMVPPRHR\*

>Pp3c4\_7390 Org\_Ppatens peptide: Pp3c4\_7390V3.4.p (1 of 5) PTHR24349//PTHR24349:SF135 -  
SERINE/THREONINE-PROTEIN KINASE // SUBFAMILY NOT NAMED (PAC:32919724)

MGNVSGRQSKNRGQQGGMSQEGSADTRFKSESERPRAEQNSQRSSATSSSRGASTHPNQGSARPASTGSAHTGSAHNASTHNNQGGSTRPASTGSTHTG  
SSHNASTHSNQQGSTRPASTGSSHGSESGHSARPSSGTAPAERPRVPMAPRPRSVSNVGLKPLVDIRQTYSLGKELGRGQFGVYTLCTHKETGEKLAC  
KSIARKKLIKEDIEDVKREVQIMHHLSTGPNIVDLKGVYEDRHSVHLMELCAGGELFDRIIAKGHYSERAAADLCRVIVNVVHRCHSLGVFHRDLKPE  
NFLASKAEDAPLQATDFGLSTFFKLGVEVFRDIVGSAYVAPEVLKRSYGPEADVWSAGVIVYILLCGVPPFWAEESEQGFDAVLKGHIDFESEPWPRIS  
SGAVDLVRNMLNPNVKERLTAYQVNLNHPWMQEGGDASDEPLDNLAVLDRLNKNSAANKMKLALKVIANSLSSEEEIVGLRELKFSMDTDNSGMVTFEELKQ  
GLIRQGTGLKEADIRKLEMAADVGNKIDFHEFISATMHMNKTEKEDHLWAAFKHFDTDNSGYITHEELQEALENSGMGDPQAIQEI IREVDTDNDGKI  
DYDEFVAMMRKGNPDTEDGVMVPPRHR\*

>Pp3c4\_7390 Org\_Ppatens peptide: Pp3c4\_7390V3.5.p (1 of 5) PTHR24349//PTHR24349:SF135 -  
SERINE/THREONINE-PROTEIN KINASE // SUBFAMILY NOT NAMED (PAC:32919725)

MGNVSGRQSKNRGQQGGMSQEGSADTRFKSESERPRAEQNSQRSSATSSSRGASTHPNQGSARPASTGSAHTGSAHNASTHNNQGGSTRPASTGSTHTG  
SSHNASTHSNQQGSTRPASTGSSHGSESGHSARPSSGTAPAERPRVPMAPRPRSVSNVGLKPLVDIRQTYSLGKELGRGQFGVYTLCTHKETGEKLAC  
KSIARKKLIKEDIEDVKREVQIMHHLSTGPNIVDLKGVYEDRHSVHLMELCAGGELFDRIIAKGHYSERAAADLCRVIVNVVHRCHSLGVFHRDLKPE



NFLFASKDEADAPLQATDFGLSTFFKLGVEVFRDIVGSAYYVAPEVLKRNYPGPEADVWSAGVIVYILLCGVPPFWAESEQGFDAVLKGHIDFESEWPWRIS  
SGAVDLVRNMLNPNVKERLTAYQVLNHPWMQEGGDASDEPLDNAVLDRLNKNSAANKMKKLLKLVIANSLSEEEIVGLRELFKSMDTDNSGMVTFEELKQ  
GLIRQGTGLKEADIRKLMEAADVDGNGKIDFHEFISATMHMKNKTEKEDHLWAAFKHFDTDNSGYITHEELQEALENSGMGDPQAIQEIIREVDTDNDGKI  
DYDEFVAMMRKGNPDTEDGVMVPPRRH\*

>Pp3c4\_7390 Org\_Ppatens peptide: Pp3c4\_7390V3.6.p (1 of 5) PTHR24349//PTHR24349:SF135 -  
SERINE/THREONINE-PROTEIN KINASE // SUBFAMILY NOT NAMED (PAC:32919726)

MGNVSGRQSKNRGQGGMSQEGSADTRFKSESERPRAEQSNQRSSATSSSRGASTHPNQGSARPASTGSAHTGSAHNASTHNNQGGSTRPASTGSTHTG  
SSHNASTHSNQGSTRPASTGSSHGSESGHSARPPSSTAPAERPRVPMAPRPRSVSNVGLGKPLVDIRQTYSLGKELGRGQFGVITYLCTHKETGEKLAC  
KSIARRKLIAKEDIEDVKREVQIMHHLSTGTPNIVDLKGVYEDRHSVHLVMELCAGGELFDRI IAKGHYSERAAADLCRIVNVVHRCHSLGVFHRDLKPE  
NFLFASKDEADAPLQATDFGLSTFFKLGVEVFRDIVGSAYYVAPEVLKRNYPGPEADVWSAGVIVYILLCGVPPFWAESEQGFDAVLKGHIDFESEWPWRIS  
SGAVDLVRNMLNPNVKERLTAYQVLNHPWMQEGGDASDEPLDNAVLDRLNKNSAANKMKKLLKLVIANSLSEEEIVGLRELFKSMDTDNSGMVTFEELKQ  
GLIRQGTGLKEADIRKLMEAADVDGNGKIDFHEFISATMHMKNKTEKEDHLWAAFKHFDTDNSGYITHEELQEALENSGMGDPQAIQEIIREVDTDNDGKI  
DYDEFVAMMRKGNPDTEDGVMVPPRRH\*

>Pp3c4\_7390 Org\_Ppatens peptide: Pp3c4\_7390V3.7.p (1 of 5) PTHR24349//PTHR24349:SF135 -  
SERINE/THREONINE-PROTEIN KINASE // SUBFAMILY NOT NAMED (PAC:32919727)

MGNVSGRQSKNRGQGGMSQEGSADTRFKSESERPRAEQSNQRSSATSSSRGASTHPNQGSARPASTGSAHTGSAHNASTHNNQGGSTRPASTGSTHTG  
SSHNASTHSNQGSTRPASTGSSHGSESGHSARPPSSTAPAERPRVPMAPRPRSVSNVGLGKPLVDIRQTYSLGKELGRGQFGVITYLCTHKETGEKLAC  
KSIARRKLIAKEDIEDVKREVQIMHHLSTGTPNIVDLKGVYEDRHSVHLVMELCAGGELFDRI IAKGHYSERAAADLCRIVNVVHRCHSLGVFHRDLKPE  
NFLFASKDEADAPLQATDFGLSTFFKLGVEVFRDIVGSAYYVAPEVLKRNYPGPEADVWSAGVIVYILLCGVPPFWAESEQGFDAVLKGHIDFESEWPWRIS  
SGAVDLVRNMLNPNVKERLTAYQVLNHPWMQEGGDASDEPLDNAVLDRLNKNSAANKMKKLLKLVIANSLSEEEIVGLRELFKSMDTDNSGMVTFEELKQ  
GLIRQGTGLKEADIRKLMEAADVDGNGKIDFHEFISATMHMKNKTEKEDHLWAAFKHFDTDNSGYITHEELQEALENSGMGDPQAIQEIIREVDTDNDGKI  
DYDEFVAMMRKGNPDTEDGVMVPPRRH\*

>Pp3c4\_7390 Org\_Ppatens peptide: Pp3c4\_7390V3.8.p (1 of 5) PTHR24349//PTHR24349:SF135 -  
SERINE/THREONINE-PROTEIN KINASE // SUBFAMILY NOT NAMED (PAC:32919728)

MGNVSGRQSKNRGQGGMSQEGSADTRFKSESERPRAEQSNQRSSATSSSRGASTHPNQGSARPASTGSAHTGSAHNASTHNNQGGSTRPASTGSTHTG  
SSHNASTHSNQGSTRPASTGSSHGSESGHSARPPSSTAPAERPRVPMAPRPRSVSNVGLGKPLVDIRQTYSLGKELGRGQFGVITYLCTHKETGEKLAC  
KSIARRKLIAKEDIEDVKREVQIMHHLSTGTPNIVDLKGVYEDRHSVHLVMELCAGGELFDRI IAKGHYSERAAADLCRIVNVVHRCHSLGVFHRDLKPE  
NFLFASKDEADAPLQATDFGLSTFFKLGVEVFRDIVGSAYYVAPEVLKRNYPGPEADVWSAGVIVYILLCGVPPFWAESEQGFDAVLKGHIDFESEWPWRIS  
SGAVDLVRNMLNPNVKERLTAYQVLNHPWMQEGGDASDEPLDNAVLDRLNKNSAANKMKKLLKLVIANSLSEEEIVGLRELFKSMDTDNSGMVTFEELKQ  
GLIRQGTGLKEADIRKLMEAADVDGNGKIDFHEFISATMHMKNKTEKEDHLWAAFKHFDTDNSGYITHEELQEALENSGMGDPQAIQEIIREVDTDNDGKI  
DYDEFVAMMRKGNPDTEDGVMVPPRRH\*

>Pp3c6\_50 Org\_Ppatens peptide: Pp3c6\_50V3.1.p (1 of 9) PTHR24349:SF81 - CALCIUM-DEPENDENT PROTEIN  
KINASE 20 (PAC:32978421)

MAEVALLNPLEQIHDFAVLQHKSEVDKDIYTLGKKGEGQFGITYLCTEKATGLKYACKCIPKRKLISEEEIENVGREIEVVMYHLAGHPNIVAIGAYED  
ETMVYLVMECEGGEFLDRI IERGTYTEAKAADLRTIVGVVEACHNSGVVHRDLKPENFLFQTKHEDSMLKAADFSSRRFFEPGDVFTFTEIVGSPFYVAP  
EVLDRHYGPEADIWSAGVILYILLSGVPPFWAETVQGFEEVVMKGEPPSFAADPWPNISEGAKDLIRQMLNPDPRKRLTAAEVLKHPWIREDGVASNKPI  
ASLVQFRLKQFSAMNKLKLAIRIIAEKLSSEEEIACLKEIFSEMDRDKGAI SFEELKEGLLKAGTTLKDP EIFDLMDAADIDQDGI IDYGEFLAATLSL  
NHIELEENLFAAFQYFDKDGSGHITMDEVLAVCREFNMEDVLIEDLLHEVDVDHDGTIDYKMFVTMMRKNGGGVGHQTLRCTLGITDVLADHMT\*

>Pp3c6\_50 Org\_Ppatens peptide: Pp3c6\_50V3.2.p (1 of 9) PTHR24349:SF81 - CALCIUM-DEPENDENT PROTEIN  
KINASE 20 (PAC:32978422)

MAEVALLNPLEQIHDFAVLQHKSEVDKDIYTLGKKGEGQFGITYLCTEKATGLKYACKCIPKRKLISEEEIENVGREIEVVMYHLAGHPNIVAIGAYED  
ETMVYLVMECEGGEFLDRI IERGTYTEAKAADLRTIVGVVEACHNSGVVHRDLKPENFLFQTKHEDSMLKAADFSSRRFFEPGDVFTFTEIVGSPFYVAP  
EVLDRHYGPEADIWSAGVILYILLSGVPPFWAETVQGFEEVVMKGEPPSFAADPWPNISEGAKDLIRQMLNPDPRKRLTAAEVLKHPWIREDGVASNKPI  
ASLVQFRLKQFSAMNKLKLAIRIIAEKLSSEEEIACLKEIFSEMDRDKGAI SFEELKEGLLKAGTTLKDP EIFDLMDAADIDQDGI IDYGEFLAATLSL  
NHIELEENLFAAFQYFDKDGSGHITMDEVLAVCREFNMEDVLIEDLLHEVDVDHDGTIDYKMFVTMMRKNGGGVGHQTLRCTLGITDVLADHMT\*

>Pp3c6\_50 Org\_Ppatens peptide: Pp3c6\_50V3.3.p (1 of 9) PTHR24349:SF81 - CALCIUM-DEPENDENT PROTEIN  
KINASE 20 (PAC:32978423)

MAEVALLNPLEQIHDFAVLQHKSEVDKDIYTLGKKGEGQFGITYLCTEKATGLKYACKCIPKRKLISEEEIENVGREIEVVMYHLAGHPNIVAIGAYED  
ETMVYLVMECEGGEFLDRI IERGTYTEAKAADLRTIVGVVEACHNSGVVHRDLKPENFLFQTKHEDSMLKAADFSSRRFFEPGDVFTFTEIVGSPFYVAP  
EVLDRHYGPEADIWSAGVILYILLSGVPPFWAETVQGFEEVVMKGEPPSFAADPWPNISEGAKDLIRQMLNPDPRKRLTAAEVLKHPWIREDGVASNKPI  
ASLVQFRLKQFSAMNKLKLAIRIIAEKLSSEEEIACLKEIFSEMDRDKGAI SFEELKEGLLKAGTTLKDP EIFDLMDAADIDQDGI IDYGEFLAATLSL  
NHIELEENLFAAFQYFDKDGSGHITMDEVLAVCREFNMEDVLIEDLLHEVDVDHDGTIDYKMFVTMMRKNGGGVGHQTLRCTLGITDVLADHMT\*

>Pp3c7\_22440 Org\_Ppatens peptide: Pp3c7\_22440V3.1.p (1 of 4) PTHR24349:SF167 - CALCIUM-DEPENDENT  
PROTEIN KINASE 10-RELATED (PAC:32925272)

MGNCCAGSATKKPKQRPNPFAQDGYQANSQILKNQPKAKILDYILGRELGRGFEFGITYLCTDKETGETLACKSISKKKLRTAVDVEDVRREVAIMKHL  
EHPNIVTLNGAFEDDNVAVHLMELCEGGEFLDRI IARGHYTERGAAQVTRTIVEVVQACHIQGVHRDLKPENFLFANKNENSVLKAI DFGLSVFFKPG  
KFSEIVGSPYMAPEVLKRNYPGPEVDVWSAGVILYILLCGVPPFWAETEQQVAQAAILRGVLDKFRDPWPVKVSDSAKSLVRRMLEPDPKARYNAQQVLDHP  
WLQNAKKNPNVPLDTRSRKQFSAMNKLKRALQVIAESLGGEEEMNGLKEMFEKLDSDNAGVITFEKLMGLIEIGSQTLEHEVRMLMGAAVDGNGAL  
DYGEFVAAAVHLQRLGDDEYLKAFDVFVDGSGYIETEELRVAVGPELNGSPSESDVVQGI LLEVVDVDKGRISYEFSAMMRRGTDWRKASRQYSRDR  
FNSLSMRLVREGSLNPDKSVAVR\*

>Pp3c7\_22440 Org\_Ppatens peptide: Pp3c7\_22440V3.2.p (1 of 4) PTHR24349:SF167 - CALCIUM-DEPENDENT  
PROTEIN KINASE 10-RELATED (PAC:32925273)

MGNCCAGSATKKPKQRPNPFAQDGYQANSQILKNQPKAKILDYILGRELGRGFEFGITYLCTDKETGETLACKSISKKKLRTAVDVEDVRREVAIMKHL  
EHPNIVTLNGAFEDDNVAVHLMELCEGGEFLDRI IARGHYTERGAAQVTRTIVEVVQACHIQGVHRDLKPENFLFANKNENSVLKAI DFGLSVFFKPG  
KFSEIVGSPYMAPEVLKRNYPGPEVDVWSAGVILYILLCGVPPFWAETEQQVAQAAILRGVLDKFRDPWPVKVSDSAKSLVRRMLEPDPKARYNAQQVLDHP

WLQNAKKNPNVPLDTRVRSRLKQFSAMNKLKRALQVIAESLGGEEENGLKEMFEKLDSDNAGVITFEKLMGLIEIGSQLTEHEVRMLMGAAADVGNAL  
DYGEFVAAAVHLQRLGDDEYLRKAFDVFVDVDSGYIETEELRVAVGEPLNGSPSESDVVQGIILEVDVDKDGRI SYEEFSAMMRRTDWRKASRQYSRDR  
FNSLSMRLVREGSLNPDKSAVVR\*

>Pp3c7\_22440 Org\_Ppatens peptide: Pp3c7\_22440V3.3.p (1 of 4) PTHR24349:SF167 - CALCIUM-DEPENDENT  
PROTEIN KINASE 10-RELATED (PAC:32925274)  
MGNCCAGSATAKKPKQRPNPFAQDGYQANSQILKNQPKAKILDKYILGRELGRGEFGITYLCTDKETGETLACKSISKKKLRTAVDVEDVREVAIMKHL  
EHPNIVTLNGAFEDDNAVHLMELCEGGELFDRI IARGHYTERGAAQVTRTIVEVVQACHIQGVIRHDLKPENFLFANKNENSVLKAI DFGLSVFFKPG  
KFSEIVGSPYYMAPEVLKRNYPPEVDVWSAGVILYILLCGVPPFWAETE QGVAQA IIRGLVDFKRDWPVKVSDSAKSLVRRMLEPDPKARYNAQQVLDHP  
WLQNAKKNPNVPLDTRVRSRLKQFSAMNKLKRALQVIAESLGGEEENGLKEMFEKLDSDNAGVITFEKLMGLIEIGSQLTEHEVRMLMGAAADVGNAL  
DYGEFVAAAVHLQRLGDDEYLRKAFDVFVDVDSGYIETEELRVAVGEPLNGSPSESDVVQGIILEVDVDKDGRI SYEEFSAMMRRTDWRKASRQYSRDR  
FNSLSMRLVREGSLNPDKSAVVR\*

>Pp3c7\_22440 Org\_Ppatens peptide: Pp3c7\_22440V3.4.p (1 of 4) PTHR24349:SF167 - CALCIUM-DEPENDENT  
PROTEIN KINASE 10-RELATED (PAC:32925275)  
MGNCCAGSATAKKPKQRPNPFAQDGYQANSQILKNQPKAKILDKYILGRELGRGEFGITYLCTDKETGETLACKSISKKKLRTAVDVEDVREVAIMKHL  
EHPNIVTLNGAFEDDNAVHLMELCEGGELFDRI IARGHYTERGAAQVTRTIVEVVQACHIQGVIRHDLKPENFLFANKNENSVLKAI DFGLSVFFKPG  
KFSEIVGSPYYMAPEVLKRNYPPEVDVWSAGVILYILLCGVPPFWAETE QGVAQA IIRGLVDFKRDWPVKVSDSAKSLVRRMLEPDPKARYNAQQVLDHP  
WLQNAKKNPNVPLDTRVRSRLKQFSAMNKLKRALQVIAESLGGEEENGLKEMFEKLDSDNAGVITFEKLMGLIEIGSQLTEHEVRMLMGAAADVGNAL  
DYGEFVAAAVHLQRLGDDEYLRKAFDVFVDVDSGYIETEELRVAVGEPLNGSPSESDVVQGIILEVDVDKDGRI SYEEFSAMMRRTDWRKASRQYSRDR  
FNSLSMRLVREGSLNPDKSAVVR\*

>Pp3c7\_22710 Org\_Ppatens peptide: Pp3c7\_22710V3.1.p (1 of 4) PTHR24349:SF167 - CALCIUM-DEPENDENT  
PROTEIN KINASE 10-RELATED (PAC:32925774)  
MGNCCVGSSTKKSQRERRTNFPAPQDGFQSTNQILKNQPKARILDKYVGLGRELGRGEFGITYLCTDKETQDVFAKSIKSKKLRTAVDVEDVREFAIMK  
HLPEHPHVVT LKGAYEDDNAVHLMELCEGGELFDRI IARGHYTERGAAQVTRTIVEVVQACHRQGMHRDLKPENFLFANKDENSPKAI DFGLSVFFK  
PGEKFSEIVGSPYYMAPEVLKRNYPPEVDVWSAGVILYILLCGVPPFWAETE QGVAQA IIRGLVDFKRDWPVKVSESAKSVRRMLEPDPKARYNAQQV  
L DHPWLQNAKKNPNVPLDTRVRSRLKQFSAMNKLKRALQVIAEHLGGEEIDGLKEMFEKLDSDNTGTITFEKLMGLIEIGSQLTEHEVRMLMEAADVDGN  
RTL DYGEFVAATVHLQRLDDDDHLRRAFDFVDVNESGFI EVEELREAVGESLMGSSSES DVVQA I LSEVDL DDKDGRISYEEFAMMRRTDWRKASRQYS  
RDRFNSLSTRLLRDGSLNPPSSYSTR\*

>Pp3c7\_22710 Org\_Ppatens peptide: Pp3c7\_22710V3.2.p (1 of 4) PTHR24349:SF167 - CALCIUM-DEPENDENT  
PROTEIN KINASE 10-RELATED (PAC:32925775)  
MGNCCVGSSTKKSQRERRTNFPAPQDGFQSTNQILKNQPKARILDKYVGLGRELGRGEFGITYLCTDKETQDVFAKSIKSKKLRTAVDVEDVREFAIMK  
HLPEHPHVVT LKGAYEDDNAVHLMELCEGGELFDRI IARGHYTERGAAQVTRTIVEVVQACHRQGMHRDLKPENFLFANKDENSPKAI DFGLSVFFK  
PGEKFSEIVGSPYYMAPEVLKRNYPPEVDVWSAGVILYILLCGVPPFWAETE QGVAQA IIRGLVDFKRDWPVKVSESAKSVRRMLEPDPKARYNAQQV  
L DHPWLQNAKKNPNVPLDTRVRSRLKQFSAMNKLKRALQVIAEHLGGEEIDGLKEMFEKLDSDNTGTITFEKLMGLIEIGSQLTEHEVRMLMEAADVDGN  
RTL DYGEFVAATVHLQRLDDDDHLRRAFDFVDVNESGFI EVEELREAVGESLMGSSSES DVVQA I LSEVDL DDKDGRISYEEFAMMRRTDWRKASRQYS  
RDRFNSLSTRLLRDGSLNPPSSYSTR\*

>Pp3c7\_25180 Org\_Ppatens peptide: Pp3c7\_25180V3.1.p (1 of 2) PTHR24349:SF93 - CALCIUM-DEPENDENT PROTEIN  
KINASE 14 (PAC:32925156)  
MGNCCVGSSTKKSRRERRPNPFAQDGYHTNLQILKNQPKARILDKYVGLGRELGRGEFGITYLCTDKETQEIFACKSISKKKLRTAVDVEDVREVAIMKH  
LPEHPHVVT LKGAYEDDNAVHLMELCEGGELFDRI IARGHYTERGAAQVTRTIVEVVQACHRQGMHRDLKPENFLFANKNENSPLKAI DFGLSVFFK  
GKFESEIVGSPYYMAPEVLKRNYPPEVDVWSAGVILYILLCGVPPFWAETE QGVAQA IIRGLVDFKRDWPVKVSDSAKSLVRRMLEPDPKARYNAQQV  
L DHPWLQNAKKNPNVPLDTRVRSRLKQFSAMNKLKRALQVIAERLGGEEIDGLKEILEKLDIDNMGVITFEKLMGLIEIGSQLTEHEVRMLMEAADVDGN  
RTL DYGEFVAAAVHLQRLDDDEHLRRAFDFVDVNESGFI EVEELREAVGESLTGSPSESDVVQGI LSEVDL DDKDGRISYEEFATMMRRRTDWRKASRQYS  
RDRFNSLSTRLLRDGSLNPPSSYSTR\*

>Pp3c7\_25180 Org\_Ppatens peptide: Pp3c7\_25180V3.2.p (1 of 2) PTHR24349:SF93 - CALCIUM-DEPENDENT PROTEIN  
KINASE 14 (PAC:32925157)  
MGNCCVGSSTKKSRRERRPNPFAQDGYHTNLQILKNQPKARILDKYVGLGRELGRGEFGITYLCTDKETQEIFACKSISKKKLRTAVDVEDVREVAIMKH  
LPEHPHVVT LKGAYEDDNAVHLMELCEGGELFDRI IARGHYTERGAAQVTRTIVEVVQACHRQGMHRDLKPENFLFANKNENSPLKAI DFGLSVFFK  
GKFESEIVGSPYYMAPEVLKRNYPPEVDVWSAGVILYILLCGVPPFWAETE QGVAQA IIRGLVDFKRDWPVKVSDSAKSLVRRMLEPDPKARYNAQQV  
L DHPWLQNAKKNPNVPLDAVRSRLKQFSAMNKLKRALQVIAERLGGEEIDGLKEILEKLDIDNMGVITFEKLMGLIEIGSQLTEHEVRMLMEAADVDGN  
RTL DYGEFVAAAVHLQRLDDDEHLRRAFDFVDVNESGFI EVEELREAVGESLTGSPSESDVVQGI LSEVDL DDKDGRISYEEFATMMRRRTDWRKASRQYS  
RDRFNSLSTRLLRDGSLNPPSSYSTR\*

>Pp3c7\_25180 Org\_Ppatens peptide: Pp3c7\_25180V3.3.p (1 of 2) PTHR24349:SF93 - CALCIUM-DEPENDENT PROTEIN  
KINASE 14 (PAC:32925158)  
MKHLPEHPHVVT LKGAYEDDNAVHLMELCEGGELFDRI IARGHYTERGAAQVTRTIVEVVQACHRQGMHRDLKPENFLFANKNENSPLKAI DFGLSV  
FKPGEKFSEIVGSPYYMAPEVLKRNYPPEVDVWSAGVILYILLCGVPPFWAETE QGVAQA IIRGLVDFKRDWPVKVSDSAKSLVRRMLEPDPKARYNAQ  
VLDHPWLQNAKKNPNVPLDAVRSRLKQFSAMNKLKRALQVIAERLGGEEIDGLKEILEKLDIDNMGVITFEKLMGLIEIGSQLTEHEVRMLMEAADVD  
GNRTL DYGEFVAAAVHLQRLDDDEHLRRAFDFVDVNESGFI EVEELREAVGESLTGSPSESDVVQGI LSEVDL DDKDGRISYEEFATMMRRRTDWRKASR  
QYSRDRFNSLSTRLLRDGSLNPPSSYSTR\*

>Pp3c8\_690 Org\_Ppatens peptide: Pp3c8\_690V3.1.p (1 of 3) PTHR24349:SF95 - CALCIUM-DEPENDENT PROTEIN  
KINASE 3 (PAC:32965098)  
MGNTSARPRDRGRKHKASQGNDSVQPKSHQSSHGSDSGHPGGSHRGGSYGGSQSRHVPKMKSSSTGILGKPLRDIKHLHYTLGRELGRGQFVYTLCTDKET  
GISYACKTIAKRKLTNKDDIEDVKREVQIMHHSGLTPNIVELKDVFDKQNVNLMELCAGGELFDRI IAKGHYSERDAADMCRVITVVRHCHSLGVF  
H RDLKPENFLAKDKNAFLKATDFGLSIFFKPGDEFHDI VGSAYVAPEVLKRSYGEADVWSAGVIVYILLCGVPPFWAETEKEIFDTIMRGHIDFKSD  
PWPKI SDEAKDLVKKMLNSNVKERLTAQEVNLNHPWQQRDGVDPVPLDNAVLTIRLRFNSAANKMKLALKVIADNLSEEEIVGLRELFKSIDTNSGTVTI  
DELKGLLQKQTRLT EADVRKLMEAADVDVNGKIDFNEFISATMHMNTQKEDHLHAAFQHFDTDNSGYIT IYELQEAMEKQGMGPETLQEI INEVDTD

HDGRIDYDEFVAMMRKGNPGTEDGGNLKSPRRHW\*

>Pp3c8\_690 Org\_Ppatens peptide: Pp3c8\_690V3.2.p (1 of 3) PTHR24349:SF95 - CALCIUM-DEPENDENT PROTEIN KINASE 3 (PAC:32965099)

MGNTSARPRDRGRKHKASQGNDVSVQPKSHQSSHGDSGHPGGSHRGGSYGGSQSRHVPKMKSSSTGILGKPLRDIKLYHTLGRGLRQGFVTVLCTDKET  
GISYACKTIAKRKLTNKDDIEDVKREVQIMHHLSTGPNIVELKDVFDKQNVNLMELCAGGELFDRIIAKGHYSERDAADMCRVIVTVVHRCHSLGVFVH  
RDLKPNENFLASKDKNAPLKTDFGLSIFFKPGDEFHDI VGSAYVVAPEVLKRSYGPEADVWSAGVIVYILLCGVPPFWAETEKEIFDITMRGHIDFKSD  
PWPKISDEAKDLVKKMLNSNVKERLTAQEVLNHPWQORDGVPDPLDNVLTRLRNFSANKMKKLLKLVIAADNLSEEEIVGLRLEFKSIDTDNSGTVTI  
DELKKGGLKQGRTRLEADVRLKMEAADVDGNGKIDFNEFISATMHMNTKQKEDHLHAAFQHFDTDNSGYIT IYELQEAEMEKQGMGPETLQEIINEVDTD  
HDGRIDYDEFVAMMRKGNPGTEDGGNLKSPRRHW\*

>Pp3c8\_690 Org\_Ppatens peptide: Pp3c8\_690V3.3.p (1 of 3) PTHR24349:SF95 - CALCIUM-DEPENDENT PROTEIN KINASE 3 (PAC:32965100)

MGNTSARPRDRGRKHKASQGNDVSVQPKSHQSSHGDSGHPGGSHRGGSYGGSQSRHVPKMKSSSTGILGKPLRDIKLYHTLGRGLRQGFVTVLCTDKET  
GISYACKTIAKRKLTNKDDIEDVKREVQIMHHLSTGPNIVELKDVFDKQNVNLMELCAGGELFDRIIAKGHYSERDAADMCRVIVTVVHRCHSLGVFVH  
RDLKPNENFLASKDKNAPLKTDFGLSIFFKPGDEFHDI VGSAYVVAPEVLKRSYGPEADVWSAGVIVYILLCGVPPFWAETEKEIFDITMRGHIDFKSD  
PWPKISDEAKDLVKKMLNSNVKERLTAQEVLNHPWQORDGVPDPLDNVLTRLRNFSANKMKKLLKLVIAADNLSEEEIVGLRLEFKSIDTDNSGTVTI  
DELKKGGLKQGRTRLEADVRLKMEAADVDGNGKIDFNEFISATMHMNTKQKEDHLHAAFQHFDTDNSGYIT IYELQEAEMEKQGMGPETLQEIINEVDTD  
HDGRIDYDEFVAMMRKGNPGTEDGGNLKSPRRHW\*

>Pp3c8\_690 Org\_Ppatens peptide: Pp3c8\_690V3.4.p (1 of 3) PTHR24349:SF95 - CALCIUM-DEPENDENT PROTEIN KINASE 3 (PAC:32965101)

MGNTSARPRDRGRKHKASQGNDVSVQPKSHQSSHGDSGHPGGSHRGGSYGGSQSRHVPKMKSSSTGILGKPLRDIKLYHTLGRGLRQGFVTVLCTDKET  
GISYACKTIAKRKLTNKDDIEDVKREVQIMHHLSTGPNIVELKDVFDKQNVNLMELCAGGELFDRIIAKGHYSERDAADMCRVIVTVVHRCHSLGVFVH  
RDLKPNENFLASKDKNAPLKTDFGLSIFFKPGDEFHDI VGSAYVVAPEVLKRSYGPEADVWSAGVIVYILLCGVPPFWAETEKEIFDITMRGHIDFKSD  
PWPKISDEAKDLVKKMLNSNVKERLTAQEVLNHPWQORDGVPDPLDNVLTRLRNFSANKMKKLLKLVIAADNLSEEEIVGLRLEFKSIDTDNSGTVTI  
DELKKGGLKQGRTRLEADVRLKMEAADVDGNGKIDFNEFISATMHMNTKQKEDHLHAAFQHFDTDNSGYIT IYELQEAEMEKQGMGPETLQEIINEVDTD  
HDGRIDYDEFVAMMRKGNPGTEDGGNLKSPRRHW\*

>Pp3c9\_21410 Org\_Ppatens peptide: Pp3c9\_21410V3.1.p (1 of 3) PTHR24349:SF95 - CALCIUM-DEPENDENT PROTEIN KINASE 3 (PAC:32913788)

MGNQCVGAIGGYPYKQEKAAHHVHGHRDGGVGRVGVGHGQGNQOQHYRQNVQERGVETTTTRTAPPVTPMPKPRPVNVAAGTVLGGKPLSDVRSVYTLGKELGR  
GQFGVTVYACTNIKTGEHLACKSIAKRKLIKEDIEDVRRREVQIMHHLSTGPNVVELKGVFEDKHHVHIVMELCAGGELFDRIIAKGHYSERAAAALCRTI  
VSVVHRCHSLNVFHRDLKPNENFLANKAENSSLKATDFGLSVFFKPGEVFHEIVGSAYVVAPEVLRNRYGPEADVWSAGVIVYILLCGVPPFWAEESEQGI  
FDAVLKGYIDFKSDPWPVKVSAAKDLVSKMLKQDPKERLTAQEVLPKPMKEDGDAPDEPLDNVLTRLKFNSSANKMKKLLQVIAQSLSEDEIMGLKE  
MFKAMDTDNGTITFDELKEGLHRQGSKLVESDVKKLMEAADVDGNGKIDFSEFISATMHMNTKVEKEDHLAEAFQHFDTDNGSGYITVEELQEAEMAKNGMG  
DPETINEIIREVDTDNDGRIDYDEFVAMMRKGNPEVPMQMTTRRHR\*

>Pp3c9\_21410 Org\_Ppatens peptide: Pp3c9\_21410V3.2.p (1 of 3) PTHR24349:SF95 - CALCIUM-DEPENDENT PROTEIN KINASE 3 (PAC:32913789)

MGNQCVGAIGGYPYKQEKAAHHVHGHRDGGVGRVGVGHGQGNQOQHYRQNVQERGVETTTTRTAPPVTPMPKPRPVNVAAGTVLGGKPLSDVRSVYTLGKELGR  
GQFGVTVYACTNIKTGEHLACKSIAKRKLIKEDIEDVRRREVQIMHHLSTGPNVVELKGVFEDKHHVHIVMELCAGGELFDRIIAKGHYSERAAAALCRTI  
VSVVHRCHSLNVFHRDLKPNENFLANKAENSSLKATDFGLSVFFKPGEVFHEIVGSAYVVAPEVLRNRYGPEADVWSAGVIVYILLCGVPPFWAEESEQGI  
FDAVLKGYIDFKSDPWPVKVSAAKDLVSKMLKQDPKERLTAQEVLPKPMKEDGDAPDEPLDNVLTRLKFNSSANKMKKLLQVIAQSLSEDEIMGLKE  
MFKAMDTDNGTITFDELKEGLHRQGSKLVESDVKKLMEAADVDGNGKIDFSEFISATMHMNTKVEKEDHLAEAFQHFDTDNGSGYITVEELQEAEMAKNGMG  
DPETINEIIREVDTDNDGRIDYDEFVAMMRKGNPEVPMQMTTRRHR\*

>Sphfalx0012s0095 Org\_Sfallax peptide: Sphfalx0012s0095.1.p (1 of 8) PTHR24349:SF167 - CALCIUM-DEPENDENT PROTEIN KINASE 10-RELATED (PAC:32627609)

MGNCCLGFSAPESRKRKPNPFAQDQGESQQAASAAVHILKNQPKSRISDKYVMGELGRGEFGVTVLCTDIENNGGGRGEKYACKSISKRLRTAIDVEDV  
RREVAIMNHLRQHPNIVKLAAYEDEHAVHLMELCEGGELFDRIIARGHYTERAAAVVTRTIVEVVQVCHQHGVMHRDLKPNENFLANKKEVSLKAIID  
FGLSVFFKPGKPFVEIVGSPYMAPEVLKRNRYGPEIDVWSAGVILYILLCGVPPFWAETEQQVAQAAILRGLTDFKRDPLVSDAAKSLVHHMLEPDPPTA  
RFNAQQVLDHPWLQNAKTNPNIPLDVRSRLKQFSAAMNKLKALQVIAELIGSEEIQKLQDMFETMDTDKNGAITLEELKNGLVQIGSQLTEGEVQQLM  
DAADV DNGTLDYGEFVAATIHLQRLDNDHLLKAFQFDANGSGYIEMDELRAAIGDHLVSDMMSVINAILEEVDTRDGRISYDEFSAMMRRGTDRWK  
ASRQYSRDLFNSLSMRLLRNGTVNPNQSER\*

>Sphfalx0019s0046 Org\_Sfallax peptide: Sphfalx0019s0046.1.p (1 of 8) PTHR24349:SF167 - CALCIUM-DEPENDENT PROTEIN KINASE 10-RELATED (PAC:32600007)

MGNCCVASSAAPKPKKPKSNPFAQDQGVQVSGNQILKNQPKVSIADKYMLGRELGRGEFGVTVLCTDIENNGGGRGEKYACKSISKRLRTAIDVEDV  
MGLPKHPNIVTLKAGAYEDQAVHLMELCEGGELFDRIIARGHYTERAAAVVTRTIVEVVQVCHQHGVMHRDLKPNENFLANKKEVSLKAIIDFGLSVF  
FKPGERFSEIVGSPYMAPEVLKRNRYGPEIDVWSAGVILYILLCGVPPFWAETEQQVAQAAILRGLTDFKRDPLVSDAAKSLVHHMLEPDPKARYNAQQ  
VLDHPWLQNAKKNVPLDAVRSRLKQFAAMNKLKALQVIAEHLGDGDEIDGLRDMFQEMMDTDNMGAITFEKLGAGLIQIGSHLTAEVRMLMDAADVD  
NGTLDYGEFVAATIHLQRLDNDHLLKAFQFDANGSGYIEMDELRAAIGDHLVSDMMSVINAILEEVDTRDGRISYDEFSAMMRRGTDRWKASRQYS  
RDRFNSLSVRLFRDGRNPNPMSKR\*

>Sphfalx0022s0143 Org\_Sfallax peptide: Sphfalx0022s0143.1.p (1 of 3) PTHR24349:SF95 - CALCIUM-DEPENDENT PROTEIN KINASE 3 (PAC:32616043)

MGNQCGSGSDSPNSDKTYTSPHVATHNSHTSSAPSSAAPAAAHNSHNSMAHKVPPALILPMPKPHSNFPTIGHVLGRPLEDVQRQTYTLGRELGRQGF  
VTVLCTHNSREVFACKSIAKRKLTTKEDIEDVKREVQIMHHLSTGPNIVELKGVYEDRHSVHLMELCAGGELFDRIIAKGHYSERAAAALCRTIIVKVV  
QACHSLGVMHRDLKPNENFLADKSENAAVKATDFGLSVFFKPSQVFTDIVGSAYVVAPEVLRNRYGPEADVWSAGVILYILLCGVPPYWAETEQQGIFDAV  
LGEVDFRSDPWPDISSGAKDLVKKMLQQDPKLRILTALHNGHEWVREDGKAPDKPLDSAVLTRMKQFSAAMNKLKALQVIAESLSEDEIMGLKEMFKS  
MDDNSGTITFEELKEGLQKQGSKLAESVQQLMQAADVDGNGTIEFNEFITATMHLNMEKEDHMYVAFQHFDTDHSGYITMDELEQAMTKHNMGDEDT  
IKDIIREVDTDNDGRINLYDEFVAMMRKGPFGDGGPKKHRQVNRQ\*

>Sphfalx0034s0077 Org\_Sfallax peptide: Sphfalx0034s0077.1.p (1 of 5) PTHR24349:SF81 - CALCIUM-DEPENDENT PROTEIN KINASE 20 (PAC:32628748)  
MRRYEAAARVLMGLQSPASVLRQRTENLWLDYSLGRKLGQGFVGTYYLCEVISTQKEFACKSIAKRKLISREDVEDVRRELHIMHHLSGHPNIVTIEGAY  
EDASSVHLVMEELCAGGELFDRIIQRGHYSEAKAAQLTRTIVGVVEACHSLGVMHRDLKPNFLFSNHTEDAALKTTDFGLSVVFFKPGVEFTDVVGSPPYYV  
APEVLKRHYGPEADVMSAGVILYILLSGVPPFWAETEQQGIFDQVMKGDLDVSDPWPNISESADKLIKMLNPNPARRLTAHQVLCHPWIREEGVAPDMP  
IDSAVQSRKQFSAMNRLKKAIRVIAESLSEEEIVGLKEMFKMMDTDGSGSISFEELKEGLRKGVSNLMEEDVRQLMDAADVDHNGTIDYGEFLAATLN  
LNKIEREENVAFAFSYLDKDKSGYLTDELQQACIDLHMGDMCVMEMIREVDQDNDGRIIDYNEFVTMMRKGNGGIGRSSLRNSLSWSLSDHLMAG\*  
>Sphfalx0034s0079 Org\_Sfallax peptide: Sphfalx0034s0079.1.p (1 of 5) PTHR24349:SF81 - CALCIUM-DEPENDENT PROTEIN KINASE 20 (PAC:32628931)  
MGNVCMGSVSKSWYIQMIPSAFISTPSPASTSQTTDNSNNNSNNGQKLEAELEKITQHSPLANYIPVSEANHNPPQVTELINAMVKKTEVKIVPGQSFT  
ASVLRQRTENLRDLTYLGRKLGQGFVGTYYLCEVISTQKEFACKSIAKRKLISMEDVEDVRRELHIMHHLSGHPNIVNIGAYEDVTSVHLVMEELCAGGE  
LFDRIIQRGHYSEAKAAELTRTIVGVVEACHSLGVMHRDLKPNFLFSNHSEDAALKTTDFGLSVVFFKPGEIFTDVVGSPPYYVAPEVLKRHYGPEADVMS  
AGVILYILLSGVPPFWAETEQQGIFEQVLKSELDFVSDPWPKISESAKDLRKLMLNPNVAKRLKSHQVLCHPWIREDGVAPDRPIDPAVQTRLKQFSAMNK  
LKKIAIRVIAESLSEEEIAGLKEMFLMMDSDGSGAISFEELKEGLKKGVSNLMEADIRQLMDAADVDHNGTIDYGEFLAATLNLNKIEREENLYAFAFSYL  
DKDKSGYLTDELQQACNDFHMGDMCVEDLIREVDQDNDGRIIDYNEFVTMMRKGNGGVGRSSLRNLSWGLSDALMGA\*  
>Sphfalx0038s0118 Org\_Sfallax peptide: Sphfalx0038s0118.1.p (1 of 3) PTHR24349:SF95 - CALCIUM-DEPENDENT PROTEIN KINASE 3 (PAC:32603542)  
MGNQCGGNSHTSSGKADAAAFSTSHHPQRTSSAPASYGNHNNNHTVPPVPPVTPAIPRQSRPAIGHVLRGPLEDVRKTYTLGRELGRGQGFVGTYYLCTHN  
ETGEVFAKSIKAKRLITKEDFEDVKREVQIMHHLSGHENIVELKAYEDKQSVHLVMEELCAGGELFDRIIKRGHYSERAAASLCRTIVKVVQICHSLGV  
MHRDLKPNFLLANKAENAALKATDFGLSVVFFKPGSEVFTDIVGSAYVAPEVLRNRYGPEADVMSAGVILYILLCGVPPFWAETEQQGIFDPAVLRGELDLK  
SDPWEISSGAKDLIKMLQDPKCRRLTAHEVLTHDVKEDGEAPDKPLDSAVLSRLKQFSAMNKLKMKALKVIAESLSEDEIMGLKEMFKSMDTNSGT  
ITFEELKTGLAKQGSKLESEVRQLMQAADVDGNGTIEFNEFITATMHLNKMKEKDHLHYAFAQHFDTDHSGYITIDELEQAMMKNMGERGTIKDIIREV  
DTHDGRINYDEFVAMMRKMPGLDHRKSMRGNTR\*  
>Sphfalx0040s0092 Org\_Sfallax peptide: Sphfalx0040s0092.1.p (1 of 5) PTHR24349:SF81 - CALCIUM-DEPENDENT PROTEIN KINASE 20 (PAC:32624088)  
MNNYGSSEMRVLPQGSITASVLRQRTENLRDLYILGRKLGQGFVGTYYHCTEKATGLHFACKSIAKRKLISREDVEDVRREIHIMHHLSGHPNIVTIKAY  
EDATSVHLVMEELCAGGELFDRIIQRGHYSEAKAAELTRTIVGVVETCHSLGVMHRDLKPNFLLANQREDAPLKTTDFGLSVVFFKPGEIFTDVVGSPPYYV  
APEVLRNRYGPEADVMSAGVILYILLSGVPPFWAETEQQGIFEQVLKSELDFVSDPWPKISDDAKDLIQMLNPHIESRLKAHQVLCHPWIREEGVADSRP  
IDPAVQSRKQFSAMNKLKKAIRVIAESLSEEEIAGLKEMFKMMDTDGSGAISFEELKEGLRKGVSNLKEADVRELMDAADVDHNGTIDYGEFLAATLN  
LNKIEREENLYSAFYSYLDKDKSGYLTDELQAAITDFHMGDISIDMIREVDQDNDGRIIDYNEFVTMMRKGNGGVGRALRSNLSLGLSDTNA\*  
>Sphfalx0048s0038 Org\_Sfallax peptide: Sphfalx0048s0038.1.p (1 of 8) PTHR24349:SF167 - CALCIUM-DEPENDENT PROTEIN KINASE 10-RELATED (PAC:32612500)  
MGNCCVGSAAARRSRKERRKTNPFSEHGQVSGNQILKTPKVIADKFTLGLSELGRGEFGITYLQVCDKDTQEVYACKSISKRLRTAIDVEDVRREVA  
IMGHLPFHGNIVTLKAYEDDQAVHLVMEELCAGGELFDRIIARGHYTERAAAGVTRTIVEVQVQLCHIKGVMHRDLKPNFLFANKSENSPLKAIIDFGLSI  
FFKPERFSEIVGSPYYMAPEVLKRNYGPEVDVMSAGVILYILLCGVPPFWAETEQQGVAQAILRGNLDFRREPWPVKVSDIAKALVRHMLEPDPKARYNAQ  
QVLDHPWLQAHAKRNSNVPLDAVRSRLKQFAAMNKLKKAQIIAEHLEGEVEGLRDMFQMMMDTNSGAIITFEKLVGLIQIGSHLTEADVQLMDAADV  
DNGTLDYGEFVAATIHQLRDLNDDLLHKAFAQFDANSSGYIEMEELRTAIGDHLVSDGMSVINAILEEVDTRDGCISFEFAAMRRGTDWRKASRQY  
SRDRFNLSLKLFRDGSINPPNYSK\*  
>Sphfalx0049s0049 Org\_Sfallax peptide: Sphfalx0049s0049.1.p (1 of 8) PTHR24349:SF167 - CALCIUM-DEPENDENT PROTEIN KINASE 10-RELATED (PAC:32617816)  
MGNCCGSSGANSRKRERRPNPFAQDGYHVSNGQILVNQPKASIVDKYTLGAEELGRGEFGITYSCVCDKDTQEVYACKSISKRLRTAVDVEDVRREVAIMG  
HLPQHPNIVSLKAYEDDEAVHLVMEELCAGGELFDRIIARGHYTERAAAGVTRTIVEVQVQLCHIQVMHRDLKPNFLFANKTEDSLLKAIIDFGLSVVFFK  
PGERFSEIVGSPYYMAPEVLKRNYGPEIDVMSAGVILYILLCGVPPFWAETEQQGVAQAILRGNLDFRREPWPVKVSDSAKSLVRHMLEPDPKERYNAQQVL  
DHPWLQNAKKNNSVPLDAVRSRLKQFAAMNKLKKAQIIAEHLEGEVEGLRDMFQMMMDTNSGAIITFEKLVGLIQIGSHLTEAEVQLMDAADVDSN  
GSLDYGEFVAATIHQLRDLNDDHLHKAFTHFANSSGYIEMQELRAAIGDNLVADEMVSINGILEEVDTRDGRISFEFAAMRRGTDWRKASRQYSRD  
RFNLSLMLFRDGSMPQSNYSRR\*  
>Sphfalx0049s0049 Org\_Sfallax peptide: Sphfalx0049s0049.2.p (1 of 8) PTHR24349:SF167 - CALCIUM-DEPENDENT PROTEIN KINASE 10-RELATED (PAC:32617817)  
MGNCCGSSGANSRKRERRPNPFAQDGYHVSNGQILVNQPKASIVDKYTLGAEELGRGEFGITYSCVCDKDTQEVYACKSISKRLRTAVDVEDVRREVAIMG  
HLPQHPNIVSLKAYEDDEAVHLVMEELCAGGELFDRIIARGHYTERAAAGVTRTIVEVQVQLCHIQVMHRDLKPNFLFANKTEDSLLKAIIDFGLSVVFFK  
PGERFSEIVGSPYYMAPEVLKRNYGPEIDVMSAGVILYILLCGVPPFWAETEQQGVAQAILRGNLDFRREPWPVKVSDSAKSLVRHMLEPDPKERYNAQQVL  
DHPWLQNAKKNNSVPLDAVRSRLKQFAAMNKLKKAQIIAEHLEGEVEGLRDMFQMMMDTNSGAIITFEKLVGLIQIGSHLTEAEVQLMDAADVDSN  
GSLDYGEFVAATIHQLRDLNDDHLHKAFTHFANSSGYIEMQELRAAIGDNLVADEMVSINGILEEVDTRDGRISFEFAAMRRGTDWRKASRQYSRD  
RFNLSLMLFRDGSMPQSNYSRR\*  
>Sphfalx0049s0049 Org\_Sfallax peptide: Sphfalx0049s0049.3.p (1 of 8) PTHR24349:SF167 - CALCIUM-DEPENDENT PROTEIN KINASE 10-RELATED (PAC:32617818)  
MGNCCGSSGANSRKRERRPNPFAQDGYHVSNGQILVNQPKASIVDKYTLGAEELGRGEFGITYSCVCDKDTQEVYACKSISKRLRTAVDVEDVRREVAIMG  
HLPQHPNIVSLKAYEDDEAVHLVMEELCAGGELFDRIIARGHYTERAAAGVTRTIVEVQVQLCHIQVMHRDLKPNFLFANKTEDSLLKAIIDFGLSVVFFK  
PGERFSEIVGSPYYMAPEVLKRNYGPEIDVMSAGVILYILLCGVPPFWAETEQQGVAQAILRGNLDFRREPWPVKVSDSAKSLVRHMLEPDPKERYNAQQVL  
DHPWLQNAKKNNSVPLDAVRSRLKQFAAMNKLKKAQIIAEHLEGEVEGLRDMFQMMMDTNSGAIITFEKLVGLIQIGSHLTEAEVQLMDAADVDSN  
GSLDYGEFVAATIHQLRDLNDDHLHKAFTHFANSSGYIEMQELRAAIGDNLVADEMVSINGILEEVDTRDGRISFEFAAMRRGTDWRKASRQYSRD  
RFNLSLMLFRDGSMPQSNYSRR\*  
>Sphfalx0073s0063 Org\_Sfallax peptide: Sphfalx0073s0063.1.p (1 of 8) PTHR24349:SF167 - CALCIUM-DEPENDENT PROTEIN KINASE 10-RELATED (PAC:32615718)  
MGNCCAPGGATAGPKHRKPKRPNPYAQDGYQPSGNLILKNQELRNLREYGLGREVGRGEFGITYMCTHKATQAVYACKSISKSLRTPVDVEDVR

REVAIMQHMPSPHPIVTLRAAYEDENAVHLVMECEGGELEFDRI IERVHYTERAAAGVTRTIVEVVQACHKEGVMHRDLKPNFLFANKKENSPLKAIDF  
GLSVFFKPGERFSEIVGSPYMAPEVLKRNYPGEVDVWSAGVILY ILLCGVPPFWAETEQQVAQAILRGVLDKFKREPWPEVSDSAKSLVRHMLEPDPKLR  
YTAQQVLDHPWLLNARKNPNVPLDAVRSRLKQFSAMNKLKALQVIAEHLGGEEIEGLKEMFQMMDDRRGAI TFENLKAGLLRIGSHL TEAEVRLLE  
AADLDGNGTLDYGEFVAATIHLQRLDNDEHLHKAFFNFVDSGSGYIEMDELREALGQDMVNVNESDVIKIDILQEVVIDKDGRI SYEEFAAMMRRTDWRKA  
SRQYSRDRFNLSLSTRLFRDGTSTNPPNFSKQNER\*

>Sphfalx0095s0016 Org\_Sfallax peptide: Sphfalx0095s0016.1.p (1 of 3) PTHR24349:SF95 - CALCIUM-DEPENDENT  
PROTEIN KINASE 3 (PAC:32601305)

MGNQCIGSSRTSNDKIETPFPTYPNHTSSAPAVHSNHHSSSNTQNAHPPVAVSPVPRPRVSPNVGHVLRPLEDQVNTYTLGRELGRGQFGITYLCTDN  
NTGAVFACKSI AKRKLMTKEDFEDVKREVQIMHHLSGHENIVELKGVYEDKHFNVLVMECEGGELEFDRI IQRGHYSERAAASL CRTIVKVVQICHSLGV  
MHRDLKPNFLADKSENSALKATDFGLSVFFKPEVFTDIVGSAYVAPEVLRKRYGPEADVWSVGVILY ILLCGVPPFWAETEQQGIFDAVLQGDIDFR  
SDPWEI SPAAKDLVKMLRHPDKHRLTAHEVLTTHHWIKEDGEAPDKPLDSAVLTRLKQFSAMNKMKLALKVAESLSDEIMGLKEMFKCMDT DNSGT  
ITFEELKEGLQKQGSKLAESEVRQLMQAADVDGNGTIEFNEFITATMHLNKMEKEEHLYVAFQHFDT DSHGYITIDELEQAMTRNNMGDDATIRDI KEV  
DTDHDGRINYDEFVAMMRKGT PGMDVQRKSMRGNRTR\*

>Sphfalx0112s0037 Org\_Sfallax peptide: Sphfalx0112s0037.1.p (1 of 8) PTHR24349:SF167 - CALCIUM-  
DEPENDENT PROTEIN KINASE 10-RELATED (PAC:32630832)

MGNCCVGISAASQSKKDRKPNPFAQDGGGAYPASAAAQILKNQSKCKITDKYALGKELGRGEFGITYLCTDIESGDKDACKSISKRKLRTAVDVEDVRR  
EVAIMHHLPKHPNIVKLKGEYEDEQAVHLVMECEGGELEFDRI IARGHYTERAAAVTRTIVEVVQVCHQHGVMHRDLKPNFLFANKKENSPLKAIDF  
LSVFFKPGKPFCEIVGSPYMAPEVLKRNYPGEIDVWSAGVILY ILLCGVPPFWAETEQQVAQAILRGVLDKFKRDPVVS DSAKSLVRHMLEPDPKARY  
NAQQVLDHPWLQNAKKNSTLPLDAVRSRLKQFSAMNKLKALQVIAEHLGGEEIEGLKEMFQMMDDRRSGAITFEKLTGLIQIGSQLTEGEVQLMDV  
ADVDGNGTLDYGEFVAATVHLQRFNDNDHLHKAFTHFADGSGYIEVEELRVAIGDDPSSDAETS VISSILEEVDTDKDGRI SYDEFAAMMRRTDWRK  
ASRQYSRDRFNLSLMTLLRNGSVTPAAVQNTKI\*

>Sphfalx0133s0014 Org\_Sfallax peptide: Sphfalx0133s0014.1.p (1 of 8) PTHR24349:SF167 - CALCIUM-  
DEPENDENT PROTEIN KINASE 10-RELATED (PAC:32631140)

MGNCCSGPAPPPTSPNNRKKHRRANPYAQDGYCQPGSGNLI LKKQEKTDLRKEYGLREVGRGEFGITYMCTHKTQAVYACKSISKSLRTPVDVEDVRR  
REVAIMQHMPHPHPIVTLRAAYEDDDAVHLVMECEGGELEFDRI IARGHYTERAAAGVTRTIVEVVQVCHQHGVMHRDLKPNFLFANKKENSPLKAIDF  
GLSVFFKPGDRFSEIVGSPYMAPEVLKRNYPGEIDVWSAGVILY ILLCGVPPFWAETEQQVAQAILRGVLDKFKRDPVVS DSAKSLVRHMLEPDPKLR  
YSAQQVLDHPVMVNSKKNPNVPLDAVRSRLKQFSAMNKLKALQVIAEHLGGEEIEGLKEMFQMMDDRRGVI TFDNLKAGLLHIGSQLTEGEVRLLE  
AADVDGNGTLDYGEFVAATIHLQRLDNDEHLHKAFFNFVDSGSGYIEVEELREILGDDMAVNGTDVITDILQEVVIDKDGRI SFDDFAAMMRRTDWRKA  
SRQYSRDRFNLSLSTRLFRDGTSTNPIYSKRNER\*

>Sphfalx0159s0028 Org\_Sfallax peptide: Sphfalx0159s0028.1.p (1 of 5) PTHR24349:SF81 - CALCIUM-DEPENDENT  
PROTEIN KINASE 20 (PAC:32627846)

MISKGNLSKAGNKYDKKSEQVAGIVYALKEGASKLKPENLTSVLRPTDNLKSLYILGKKGQGGFGITYLCTEKATGKEYACKTIAKRKLI CQAD  
VDDVREI HIMHHLSGHPNIVTIKAGYEDASAVHLVMECEGGELEFDRI IARGHYSEAKASELARTVVDVVEACHSLGVMHRDLKPNFLFANKKENSPLKAIDF  
KATDFGLSIFFKPGETFKKAAVVGSPYMAPEVLRKHYGIEADIWSAGVILY ILLCGVPPFWADNEQGI FESVSKAEFDLESEWPNI SESAKDLIRKMLNP  
SRVRLKAHEVLSHPWIEEGVAPDKPMSAVQSRKQFSAMNKLKALAIRVIAESMSEEEIVGLKEMFKTIDTSSGAI SFEELKEGLRKGVSNLTEAD  
IRDLMSADIDQNGTIDYGEFLAATLHMNKINREENLFAAFKFLDKNSGYITIDELEQACIQYNGDIPIEDLIRDVDQDNDGRLDYHEFVAMMRKGN  
DASQTRTDSLFFEAIKPTPKAKLPMDNLDWVG\*

>Sphfalx0202s0012 Org\_Sfallax peptide: Sphfalx0202s0012.1.p (1 of 8) PTHR24349:SF167 - CALCIUM-  
DEPENDENT PROTEIN KINASE 10-RELATED (PAC:32627879)

MGNCCVSSSSRSASRSRKRKPNPFAQDGYQISAVQILKNQSKSRTDKYVLGGELGRGEFGITYLCTDMENGCGEYACKSISKRKLRTAVDVEDVRR  
REVAIMHHLQHPNIVTKKAAVEDDHAHLVMECEGGELEFDRI IARGHYTERAAAVITRTIVEVVQVCHQHGVMHRDLKPNFLFANKKEASPLKAIDF  
GLSVFFKPGKPFYIEIVGSPYMAPEVLKRNYPGEIDVWSAGI ILY ILLCGVPPFWAETEQQVAQAILRGVLDKFKRDPVVS DSAKSLVRHMLEPDPPTAR  
FDAQQVLDHPWLQNTKKNVPLDAVRSRLKQFSAMNKLKALQVIAEHLGGEEIEKLRDMFEMIDSDKDGAI TFEELKNGLIQIGSQLTEAEVRLQMD  
AADVDGNGALNYGEFVAATIHLQRLDNDDHLRKAFAHFDTDGSGFIEEMEELRVAIGDDSTSAETS VINGILEEVDTDKDGCI SYDEFAAMMRRTDWRKA  
SRQYSRDRFNLSVRLFRDGSVNPANESKR\*

>Thecc1EG001677 Org\_Tcacao peptide: Thecc1EG001677t1 Calcium-dependent protein kinase 2 (79%T)  
(PAC:27436851)

MSKTSSTGTPSRVLPYTTPLADHYSLGKTLGQGGFGTTLCTHKTPTGQQYACKSIPKRKLI CQEDYEDVWREIQIMHHLSEHPHVRI RGTYEDQLSVH  
LVMECEGGELEFDRI VVKGHYSEREA AKLIKTIVGVVETCHSLGVMHRDLKPNFLFD TVEDEAALKATDFGLSVFYKPGESFC DVVGS PYYVAPEVLRK  
HYGPEADVWSAGVILY ILLSGVPPFWAETEMGIFRQILQKIDFDSEPPWPAISESAKDLIRKMLDRNPKGRLTAYQVLCHPWIVDDTIAPDKPLDSAVLS  
RLKQFSAMNKLKALRVAERLSEEEIGGLKELFKMIDTSSGTITFEELKDGKRVGSELMESEIKDLMDAADIDNSGTIDYGEFLAATVHLNKLERE  
ENLVSFAFAFFDKDGSYITIDELEQACKEFGLSDVHLDEMIKEIDQDNDGQIDYGEFAAMMRTGNGGIGRRTMRRTINLGDALAVMANGSKKIE\*

>Thecc1EG001677 Org\_Tcacao peptide: Thecc1EG001677t2 Calcium-dependent protein kinase 2 (79%T)  
(PAC:27436852)

MSKTSSTGTPSRVLPYTTPLADHYSLGKTLGQGGFGTTLCTHKTPTGQQYACKSIPKRKLI CQEDYEDVWREIQIMHHLSEHPHVRI RGTYEDQLSVH  
LVMECEGGELEFDRI VVKGHYSEREA AKLIKTIVGVVETCHSLGVMHRDLKPNFLFD TVEDEAALKATDFGLSVFYKPGESFC DVVGS PYYVAPEVLRK  
HYGPEADVWSAGVILY ILLSGVPPFWAETEMGIFRQILQKIDFDSEPPWPAISESAKDLIRKMLDRNPKGRLTAYQVLCHPWIVDDTIAPDKPLDSAVLS  
RLKQFSAMNKLKALRVAERLSEEEIGGLKELFKMIDTSSGTITFEELKDGKRVGSELMESEIKDLMDAADIDNSGTIDYGEFLAATVHLNKLERE  
ENLVSFAFAFFDKDGSYITIDELEQACKEFGLSDVHLDEMIKEIDQDNDGQIDYGEFAAMMRTGNGGIGRRTMRRTINLGDALAVMANGSKKIE\*

>Thecc1EG007580 Org\_Tcacao peptide: Thecc1EG007580t1 Calmodulin-domain protein kinase 5 (84%T)  
(PAC:27464444)

MGNTRGSGFKGLYQGYSPEDHSSKRNTSSDRNSDYSPTSLNAQQLIAQEFSEKTTKKTDLALISPTKKNIMRRGIDNQAYYVLGHKTPNIRDLY  
TLGRKLGQGGFGTTLCTIEISTGIEYACKSISKRLISKEDVEDVREIQIMHHLGAKHNI VTIKAYEDSLYHIVMECEGGELEFDRI IQRGHYSERK  
AAELTKI IVGVVEACHSLGVMHRDLKPNFLVKNKDDDFLSKAIDFGLSVFFKPGQVFTDVVGS PYYVAPEVLLKHYGPEADVWTAGVILY ILLSGVPPF  
WAETQQGIFDAVLKGHIDFSDPWPLISDSAKDLIRKMLCSRPSERLTAHEVLCHPWICENGVA PDRALDPAVLSRLKQFSAMNKLKALRVAESLSE

E E I A G L R E M F T T M D T D N S G A I T F D E L K A G L R R Y G S T L K D T E I R D L M D A A D V D N S G T I D Y G E F I A A T V H L N K L E R E E H L V A A F Q Y F D K D G S G Y I T V D E L Q Q  
A C A E H N M T D V L L E D I I R E V D Q D N D G R I D Y G E F V A M M Q K N A G I G R R T M R N S L N M S M R D A P G A \*  
>Thecc1EG007580 Org\_Tcacao peptide: Thecc1EG007580t2 Calmodulin-domain protein kinase 5 (84%T)  
(PAC:27464445)  
M G N T C R G S F K G K L Y Q G Y S Q P E D H S S K R N N T S S D R S N S D Y S P T S L N A Q Q L I A Q E F S K E T T K K D T H L A L I S P T K K D N I M R R G I D N Q A Y Y V L G H K T P N I R D L Y  
T L G R K L G Q G F G T T Y L C I E I S T G I E Y A C K S I S K R K L I S K E D V E D V R R E I Q I M H H L A G H K N I V T I K G A Y E D S L Y V H I V M E L C S G G E L F D R I I Q R G H Y S E R K  
A A E L T K I I V G V V E A C H S L G M H R D L K P E N F L L V N K D D D F S L K A I D F G L S V F F K P G Q V F T D V V G S P Y Y V A P E V L L K H Y G P E A D V W T A G V I L Y I L L S G V P P F  
W A E T Q Q G I F D A V L K G H I D F D S D P W P L I S D S A K D L I R K M L C S R P S E R L T A H E V L C H P W I C E N G V A P D R A L D P A V L S R L K Q F S A M N K L K K M A L R V I A E S L S E  
E E I A G L R E M F T T M D T D N S G A I T F D E L K A G L R R Y G S T L K D T E I R D L M D A A D V D N S G T I D Y G E F I A A T V H L N K L E R E E H L V A A F Q Y F D K D G S G Y I T V D E L Q Q  
A C A E H N M T D V L L E D I I R E V D Q D N D G R I D Y G E F V A M M Q K N A G I G R R T M R N S L N M S M R D A P G A \*  
>Thecc1EG013784 Org\_Tcacao peptide: Thecc1EG013784t1 Calcium-dependent protein kinase 30 (83%T)  
(PAC:27449469)  
M G N C N A C V R P D D S P E S K P N R S E H S Q R G K K K T R E R K P N P Y A E K V P S P A P I R V L K D V I P L S H R T R I G D K Y I L G R E L G R G E F G I T Y L C T D R E T R E A L A C K S I S  
K R K L R T A V D I E D V R R E V A I M S T L P E H P N I V K L K A T Y E D N E N V H L V M E L C E G G E L F D R I V A R G H Y T E R A A A N V A K T I A E V V R M C H E N G V M H R D L K P E N F L F  
A N K K E H A P L K A I D F G L S V F F K P G E R F S E I V G S P Y M A P E V L K R N Y G P E V D V S A G V I L Y I L L C G V P P F W A E T E Q G V A L A I L R G V I D F K R E P W P Q V S E S A K  
S L V R Q M L E P D P K K R L T A Q Q V L E H S W L Q N A K K A P N V P L G D I V R T R L K Q F S M N R F K K A L R V I A E H L S V E E V E V I R D M F T L M D T D N D G K V S Y E E L K A G L R K  
V G S Q L A E P E I K M L M E V A D V D G N G V L D Y G E F V A V T I H L Q K M E N D E H F R R A F M F F D K D G S G Y I E L D E L Q E A L A D E S G E A D V D V L N D I M R E V D T D K D G C I S Y D  
E F V A M M K A G T D W R K A S R Q Y S R E R F K S L S L N L M K D G S L Q L H D A V T G Q A V A V \*  
>Thecc1EG013784 Org\_Tcacao peptide: Thecc1EG013784t2 Calcium-dependent protein kinase 30 (83%T)  
(PAC:27449470)  
M G N C N A C V R P D D S P E S K P N R S E H S Q R G K K K T R E R K P N P Y A E K V P S P A P I R V L K D V I P L S H R T R I G D K Y I L G R E L G R G E F G I T Y L C T D R E T R E A L A C K S I S  
K R K L R T A V D I E D V R R E V A I M S T L P E H P N I V K L K A T Y E D N E N V H L V M E L C E G G E L F D R I V A R G H Y T E R A A A N V A K T I A E V V R M C H E N G V M H R D L K P E N F L F  
A N K K E H A P L K A I D F G L S V F F K P G E R F S E I V G S P Y M A P E V L K R N Y G P E V D V S A G V I L Y I L L C G V P P F W A E T E Q G V A L A I L R G V I D F K R E P W P Q V S E S A K  
S L V R Q M L E P D P K K R L T A Q Q V L E H S W L Q N A K K A P N V P L G D I V R T R L K Q F S M N R F K K A L R V I A E H L S V E E V E V I R D M F T L M D T D N D G K V S Y E E L K A G L R K  
V G S Q L A E P E I K M L M E V V V W N S C L H R I \*  
>Thecc1EG016367 Org\_Tcacao peptide: Thecc1EG016367t1 Calcium-dependent protein kinase 6 (81%P)  
(PAC:27449549)  
M G N C N G H P S A D N Q F R P D S D S G G G P H N G I N I K A G P S P P R P Q Q H S T T H H S S A A S N H R L A T P T T P P I G R V L G R P M E D V R S N Y V F G R E L G R G Q F G I T Y L V T H K  
E T K Q Q F A C K S I A T R K L I N R D D I E D V R R E V Q I M H H L T G H R N I V E L K G A Y E D R H S V N L I M E L C A G G E L F D R I L A K G H Y S E R E A A N L C R Q I V M V V H N C H S M G V  
M H R D L K P E N F L F L S K D E D S P L K A T D F G L S V F F K R G D V F K D L V G S A Y Y V A P E V L R R R Y G P E A D I W S A G V I L Y I L L S G V P P F Y G E T E Q S I F D S I L R N I D F S  
S D P W P S V S S A K D L V R K M L L D D P K E R L S A S E V L N H P W M R E D G D A S D K P L D I A V L T R M K Q F R A M N K L K K V A L K V I A E N L S E E E I I G L K E M F K S M D T D N S G T  
I T Y E E L K A G L P K L G T K L S E S E V R Q L M E A A D V D G N G T I D Y I E F I T A T M H M N R M E R E E H L Y T A F Q Y F D K D N S G Y I T M E E L Q A L R K Y N M G D E K T I K E I A E V  
D T D R D G R I N Y D E F V A M M R K G N P D L V G N R R R K \*  
>Thecc1EG016367 Org\_Tcacao peptide: Thecc1EG016367t2 Calcium-dependent protein kinase 6 (81%P)  
(PAC:27449550)  
M G N C N G H P S A D N Q F R P D S D S G G G P H N G I N I K A G P S P P R P Q Q H S T T H H S S A A S N H R L A T P T T P P I G R V L G R P M E D V R S N Y V F G R E L G R G Q F G I T Y L V T H K  
E T K Q Q F A C K S I A T R K L I N R D D I E D V R R E V Q I M H H L T G H R N I V E L K G A Y E D R H S V N L I M E L C A G G E L F D R I L A K G H Y S E R E A A N L C R Q I V M V V H N C H S M G V  
M H R D L K P E N F L F L S K D E D S P L K A T D F G L S V F F K R G D V F K D L V G S A Y Y V A P E V L R R R Y G P E A D I W S A G V I L Y I L L S G V P P F Y G E T E Q S I F D S I L R N I D F S  
S D P W P S V S S A K D L V R K M L L D D P K E R L S A S E V L N H P W M R E D G D A S D K P L D I A V L T R M K Q F R A M N K L K K V A L K V I A E N L S E E E I I G L K E M F K S M D T D N S G T  
I T Y E E L K A G L P K L G T K L S E S E V R Q L M E A A D V D G N G T I D Y I E F I T A T M H M N R M E R E E H L Y T A F Q Y F T T W D R E I V L A F \*  
>Thecc1EG020113 Org\_Tcacao peptide: Thecc1EG020113t1 Calcium-dependent protein kinase 24 (69%T)  
(PAC:27455265)  
M G S C I S T P S R L V G V V S K S Y N T S K T K R K L H A S F D H E A A R K S M N L R V T N G K V L K D S S G D N I L E R Y E L G K E L G R G E F G V T H Q C F D L V T G E A Y A C K K I S K A K  
L R S E I D V E D V R R E V E I M R H L P K P N I V T F R E A F E D K E A V Y L V M E L C H G G E L F D R I V A K G H Y T E R A A A T A I K T I L E I V K V C H E H G V I H R D L K P E N F L L A D E  
S E T A P I K A I D F G L S I F Y E P G Q R F S D I V G S P Y M A P E V L R R N Y G K E V D I W S I G V I L Y I L L C G V P P F W A D T E E G I A H A I I K G D I D F E R D P W P K V S E A K D L V  
R S M L D P N P Y S R M T V Q E V F E H P W I Q N L E H A P N V N L G E N V R T R I K Q F S F M S K F K K V L R V V A G N L P N E Q T D A I V Q I F R M M D T D E N G H L S F E E L R D G Q K I G H  
C V A D P D V Q L L M D A A D I D G N G T L S C E E F V T M A V H L K R M S N D E H L S Q A F H H F D K N Q S G Y I E F E E L Q E A L L H D D L G P N N E Q V I R D I I H D V D L D K D G R I S Y E E F  
K A M M L T G M D W K M A S R Q Y S R A L L N A V S I K I L K Q S G Q L R \*  
>Thecc1EG021684 Org\_Tcacao peptide: Thecc1EG021684t1 Calcium-dependent protein kinase 13 (85%T)  
(PAC:27420927)  
M G N C C R S P A A V A R E D V K S N F S A H D H A R K D S V S K Q K P P I T V L N G V P K E N I E E K Y L V D R E L G R G E F G V T Y L C I D R G T R E L L A C K S I S K R K L R T A V D I E D V R R  
E V A I M K H L P K N S S I V S L K E A C E D D N A V H L V M E L C E G G E L F D R I V A R G H Y T E R A A A V T R T I V E V V Q L C H K H G V I H R D L K P E N F L F A N K K E N S P L K A I D F G  
L S I F F K P G E R F S E I V G S P Y M A P E V L K R N Y G P E I D I W S A G V I L Y I L L C G V P P F W A E S E Q G V A Q A I L R G L I D F K R D P W P N I S E S A K S L V R Q M L E P D P K L R L  
T A K Q V L G S K I S S V L C L G E L V Y V S W E G A G W L G V Q H P W L Q N A K K A P N V P L G D V V K S R L K Q F S M M N R F K R K A L R V I A E F L S I E E V E D I K E M F K K M D T D N D G I  
V S I E E L K A G F R N F G S H L A E S E V Q M L I E A V D A N G K G T L D Y G E F L A V S L H L Q R I A N D E H L R K A F S Y F D K D G N G Y I E P D E L R D S L M E D G A D D C T N V A N D I F Q E  
V D T D K D G R I S Y D E F T A M M K T G T D W R K A S R H Y S R G R F N S L M K M L K D G S L N L G N E \*  
>Thecc1EG021684 Org\_Tcacao peptide: Thecc1EG021684t2 Calcium-dependent protein kinase 13 (85%T)  
(PAC:27420928)  
M G N C C R S P A A V A R E D V K S N F S A H D H A R K D S V S K Q K P P I T V L N G V P K E N I E E K Y L V D R E L G R G E F G V T Y L C I D R G T R E L L A C K S I S K R K L R T A V D I E D V R R  
E V A I M K H L P K N S S I V S L K E A C E D D N A V H L V M E L C E G G E L F D R I V A R G H Y T E R A A A V T R T I V E V V Q L C H K H G V I H R D L K P E N F L F A N K K E N S P L K A I D F G  
L S I F F K P G E R F S E I V G S P Y M A P E V L K R N Y G P E I D I W S A G V I L Y I L L C G V P P F W A E S E Q G V A Q A I L R G L I D F K R D P W P N I S E S A K S L V R Q M L E P D P K L R L  
T A K Q V L E H P W L Q N A K K A P N V P L G D V V K S R L K Q F S M M N R F K R K A L R V I A E F L S I E E V E D I K E M F K K M D T D N D G I V S I E E L K A G F R N F G S H L A E S E V Q M L I E  
A V D A N G K G T L D Y G E F L A V S L H L Q R I A N D E H L R K A F S Y F D K D G N G Y I E P D E L R D S L M E D G A D D C T N V A N D I F Q E V D T D K D G R I S Y D E F T A M M K T G T D W R K A  
S R H Y S R G R F N S L M K M L K D G S L N L G N E \*  
>Thecc1EG023099 Org\_Tcacao peptide: Thecc1EG023099t1 Calcium dependent protein kinase 1 (68%T)

(PAC:27421427)

MGNSCITLRKDGFLQTISNSIWWSRPAEAVGNEDEKQIGNEAHSESTEAEAVQNQPPEEMKIVKEETGREQQGKSQEETQRQQSKSAPQRLNSKPSQLAGF  
NKEETKVEPGKPRKPHNVKQSCAGLQVDSVLQTKTGHLEKYNLGRKLGHGQFTTFLCVEKGSKECACKSIKRKLTQDDVDDVREIQQIMHHMAG  
HPNVLSIKGAYEDSVAVHVMELCAGGELFDRIVKRGHYTERKAAELARTIVGVVEACHSMGMHRDLKPENFLVNEEEDSPLKAI DFGLSIFFKPGDI  
LSDVVGSPYYVAPEVLRKRYGPEADVWSAGV IYIILSGVPPFWGETEQEIFDEVLHGDLDFTSDFWPSISDSAKDLVRKMLVRDAKKRITAYEVL RHPW  
VQVDGVPDKPLDSIVLSRMKQFSAMNKLKMLARVIAQRLSEEEIAGLKEIFKMI DTDNSGQIITYEELKAGLKKFGANLAESEFHALMQAADVNSGTI  
DYEEFIAATLHLNKIEREDHLFAAFSYFDRDGSYITQDELQKACQEFGEI DISLEMIQEVDQDNDGRIDYNEFVAMMQGNPEFGMKGPGQKGF SIGF  
REALPVC\*

>Thecc1EG024724 Org\_Tcacao peptide: Thecc1EG024724t1 Calcium-dependent protein kinase 19 (81%T)

(PAC:27422680)

MGNCCATPSTGSHEKKNKQNPFSIDYQGHQNGGHKLSVLKDPDTGTEIEQSYELGRELGRGEFGITYLCTDKVTGDTFACKSISKKLRTAVDID  
DVRREVEIMKHLPKPHNIVSLKDTYEDDNAVHLMELCEGGEFDFRIVARGHYTERAAAVVTKTIVEVVQMCHKHGMHRDLKPENFLFANKKETAALKA  
IDFGLSVFFKPGERFTEIVGSPYYMAPEVLRKRYGPEVDVWSAGVILYIILCGVPPFWAETEQQVAQAIIRSFIDFKRDPWPKVSDNAKDLVRKMLNPD  
KQRLTAQEVLDHPWLQNAKAPNVLGETVKARLQFVSMNKLKRALRVIAEHLVVEEVAGIKEVFLQMDTGNRGKINIDELRVGLHKLGHITPDADLQ  
ILMEAGDVDRDGYLDYGEFVAISVHLRKMGNDEHLKKAFFEFDRNQSGFIEIEELRDALADEVETNSEEVISAIMHDVDTDKDGRISYDEFAAMMKAGTD  
WRKASRQYSRERFNSLSLKLMDGSLQSNNEPR\*

>Thecc1EG030220 Org\_Tcacao peptide: Thecc1EG030220t1 Calcium-dependent protein kinase 21 (76%T)

(PAC:27441153)

MGCCGSKHKLSEPDYKDYRSGMPPSRPVQPASQPQPVQQTQKMSVQPIQAPQMRQPPIAPLKPSPASSRFPVQGEITILGKPLEDIKQYYTLGKELGRGQ  
FGITYLCTENSTGNTYACKSILKRKLKKNQDREDIKKEVQIMQHLSGQPNIVEFRGAYEDRQSVHLMELCAGGELFDRITAQGHYSERAAAAICRSVNV  
VVHICHFMGMHRDLKPENFLSSKDEGAMLKATDFGLSVFIEEGKVYRDI VGSAYYVAPEVLRRSYGKEIDIWSAGI ILYIILSGVPPFWAETEKGIFD  
AITEGELHFESQPWPSISESAKDLIRKMLTMDPKKRLTSAQVLEHPWMREGGEASDKPIDS AVLSRLKQFRAMNKLKLLKLVIAENLSEEEIKGLKAMF  
TNMDDTKSGTITYEELKAGLARLGSKLSAEVQKLMQAADV DNGTIDYIEFISATMHRYLRLERDEHLYKAFQYFDKDNDSGYITKDELETAMKEYGMGDE  
ASIREVISEVDTDNDGKINYEFCMTRSGTQQTGKPF\*

>Thecc1EG030220 Org\_Tcacao peptide: Thecc1EG030220t2 Calcium-dependent protein kinase 21 (76%T)

(PAC:27441154)

MGCCGSKHKLSEPDYKDYRSGMPPSRPVQPASQPQPVQQTQKMSVQPIQAPQMRQPPIAPLKPSPASSRFPVQGEITILGKPLEDIKQYYTLGKELGRGQ  
FGITYLCTENSTGNTYACKSILKRKLKKNQDREDIKKEVQIMQHLSGQPNIVEFRGAYEDRQSVHLMELCAGGELFDRITAQGHYSERAAAAICRSVNV  
VVHICHFMGMHRDLKPENFLSSKDEGAMLKATDFGLSVFIEEGKVYRDI VGSAYYVAPEVLRRSYGKEIDIWSAGI ILYIILSGVPPFWAETEKGIFD  
AITEGELHFESQPWPSISESAKDLIRKMLTMDPKKRLTSAQVLEHPWMREGGEASDKPIDS AVLSRLKQFRAMNKLKLLKLVIAENLSEEEIKGLKAMF  
TNMDDTKSGTITYEELKAGLARLGSKLSAEVQKLMQAADV DNGTIDYIEFISATMHRYLRLERDEHLYKAFQYFDKDNDSQRMN\*

>Thecc1EG030220 Org\_Tcacao peptide: Thecc1EG030220t3 Calcium-dependent protein kinase 21 (76%T)

(PAC:27441155)

MGCCGSKHKLSEPDYKDYRSGMPPSRPVQPASQPQPVQQTQKMSVQPIQAPQMRQPPIAPLKPSPASSRFPVQGEITILGKPLEDIKQYYTLGKELGRGQ  
FGITYLCTENSTGNTYACKSILKRKLKKNQDREDIKKEVQIMQHLSGQPNIVEFRGAYEDRQSVHLMELCAGGELFDRITAQGHYSERAAAAICRSVNV  
VVHICHFMGMHRDLKPENFLSSKDEGAMLKATDFGLSVFIEEGKVYRDI VGSAYYVAPEVLRRSYGKEIDIWSAGI ILYIILSGVPPFWAETEKGIFD  
AITEGELHFESQPWPSISESAKDLIRKMLTMDPKKRLTSAQVLEHPWMREGGEASDKPIDS AVLSRLKQFRAMNKLKLLKLVIAENLSEEEIKGLKAMF  
TNMDDTKSGTITYEELKAGLARLGSKLSAEVQKLMQAADV DNGTIDYIEFISATMHRYLRLERDEHLYKAFQYFDKDNDSG\*

>Thecc1EG030876 Org\_Tcacao peptide: Thecc1EG030876t1 Calmodulin-domain protein kinase 9 (74%T)

(PAC:27445147)

MGGCLTKSKEPKPHNGYRSGATTTVAHVQQRQYQEPVPRPAPVQPQFHFIPEKPGAQTPWKVPVAPSPKPA PRVDTILGKPYEDIRMYRITIGKELGKGF  
GVTYLCTENSTGKQYACKTISKRLVTKNDKEDMKREIQIMQHLSGQPNIVEFKGAYEDKQSVHLMELCAGGELFDRITAKGHYSERAAAICRAIVNV  
VHACHFMGMHRDLKPENFLSSKDENALLKATDFGLSVFIEEGKVYRDI VGSAYYVAPEVLRRLRYGKEIDVWSAGVMLYIILSGVPPFWAETEKGIFDA  
ILEGEIDFESQPWPSISDSAKELVCRMLTQDPKKRITSAQVLEHPWIREGGSASDKPLDSAVLSRMKQFRMRNKLKQLALKLVIAENLSTEEIQGLKQMF  
NIDTDNSGTITYDELKNGLARLGSKLSAEVQQLMEAADVDGNGSIDYIEFISATMHRHRLERDEHLYKAFQYFDKDNDSGYITRDELETAMKEYGMGDND  
TIKEIISEVDTDNDGKINYEFCMTRSGTQGGQLF\*

>Thecc1EG030876 Org\_Tcacao peptide: Thecc1EG030876t2 Calmodulin-domain protein kinase 9 (74%T)

(PAC:27445148)

MGGCLTKSKEPKPHNGYRSGATTTVAHVQQRQYQEPVPRPAPVQPQFHFIPEKPGAQTPWKVPVAPSPKPA PRVDTILGKPYEDIRMYRITIGKELGKGF  
GVTYLCTENSTGKQYACKTISKRLVTKNDKEDMKREIQIMQHLSGQPNIVEFKGAYEDKQSVHLMELCAGGELFDRITAKGHYSERAAAICRAIVNV  
VHACHFMGMHRDLKPENFLSSKDENALLKATDFGLSVFIEEGKVYRDI VGSAYYVAPEVLRRLRYGKEIDVWSAGVMLYIILSGVPPFWAETEKGIFDA  
ILEGEIDFESQPWPSISDSAKELVCRMLTQDPKKRITSAQVLEHPWIREGGSASDKPLDSAVLSRMKQFRMRNKLKQLALKLVGHCRKSFY\*

>Thecc1EG034289 Org\_Tcacao peptide: Thecc1EG034289t1 Calcium-dependent protein kinase 29 (68%T)

(PAC:27459424)

MGLCQSQGFLCRKSGTHEIPISSSSDSSPRPYQPLPKAAREEFNPPRQKPA SENQNPNSSQIGSILLKPYVDITTFYDLDELGRGRFGITYLCTEKATG  
RKYACKSISRRLTSDKYIKVVRREILILQHLTGQPNIVEFKGAYEDRHLHLVLMELCSGGELFDRITAKGTYSERQAASIGRQIVKVVDHCFMGMHR  
DLKPENFLVSKDENSPKATGFLSVFIEEGKWYRDLVGSAYYVAPEVFNRYGKEIDVWSAGVILYIILSGVPPFWGETEETEEKILKAVLEGNLDLKSQ  
WPSISDAADLLRKLARDPQRRTASQALEHPWMEGGDTSKPKVGS AVLSRLKQFRVMNKLKLLKLVIAENLSEEEVGLKLYMNFNFDTDGSGTIT  
LEELRVGLARLGSKLSAEVQQLMEAADVDKNGIVDYIEFISATMHRHRLEREDNIYKAFQYFDKDNDSGYITRDELHRAMTEYGMGDEATI DEVIDVDI  
DKDGRINYEFCMTRSGTQDGDGKDR\*

>Thecc1EG034291 Org\_Tcacao peptide: Thecc1EG034291t1 Calcium-dependent protein kinase 29 (71%T)

(PAC:27458029)

MGLCQSLGFLCRKSGTHEIPISSSESSPRPGEFIPWQQALENQNPNSSQIGSILRKPVDITTFYDLDELGRGQFGITYLCTEKATGRKYACKS  
IRGKLSKDKREDVREILILQHLTGQPNIVKFKGAYEDRHLHLVLMELCSGGELFDRITAKGTYSERQAASIGRQIVNVVHVCFMGMHRDLKPENFL  
LVSKDENSPKATDFGLSVFIEEDRWYKDLVGSAYYVAPEVLRNRYGKEIDVWSAGVILYIILSGVPPFWGETEQEIFKAVIEGNLDLKSQWPSISDGA

KDLLSKMLARDPKRRITAAQALEHPWIKKEGGDASDKPMSAVLSRLRQFRVMNKLKLLKLVIAETLSSEEEVKGLKQMFNNIDTDGSGTITIEELRVGL  
ARLGSKLTEAEIQQLMDAADVDRSGSIDYIEFITATMPRHRLEREDNIYKAFQFFDKDNGSFITRDELQAMTEYGMGDEATIDEVIEDVDTDKDGRINY  
EEFVAMMRKGTQDGR\*

>Thecc1EG036367 Org\_Tcacao peptide: Thecc1EG036367t1 Calcium-dependent protein kinase 2 (81%P)  
(PAC:27458877)

MGWNGMEWLI PWNQTKLLRT IRRSPIQLQAYNKKQKKEEENNSKQEGRRKVKKEKEIPSEIFSAMNKKTNSSSSSSTTKPAGTVLPYQT PRLRDHYLLGK  
KLGQGGQFGTTYQCTHKATGTYACKSI PRRKLLCREDYDDVWREIQIMHLLSEHPSVVQIKGT YEDSVFVHLMELCAGGELFDRIVAKGHYSEEREAVKL  
IKTIVGVVEACHSLGVMHRDLKPENFLFSDPADDAILKATDFGLSIFYKPGQYFSDVVGSPYYVAPEVLCKYYGPEVDIWSAGVILYILLSGVPPFWAET  
ESGIFRQILHGKIDFASEPWPSISDSAKDLIRKMLERDPRQRISAHEVLCHPWIVDDRVPDKPLDSAVLSRLKQFSAMNKLKLMALRVIAERLSEEEIG  
GLKELFKMIDTNSGTITFQELKDGKLVGSELMESEIKSLMEAADIDNSGTIDYGEFLAATLHINKMEREENLVAAFSFFDKDGSYITIDELQONACKE  
FGLGDVHLDemiKEIDQDNDGRIDYGEFTAMMRKGDGIGRSRTMRSNLNFTIADAFGVKDPSTSDSN\*

>Thecc1EG036367 Org\_Tcacao peptide: Thecc1EG036367t2 Calcium-dependent protein kinase 2 (81%P)  
(PAC:27458879)

MNKKTNSSSSSSTTKPAGTVLPYQT PRLRDHYLLGKLLGQGGQFGTTYQCTHKATGTYACKSI PRRKLLCREDYDDVWREIQIMHLLSEHPSVVQIKGT  
YEDSVFVHLMELCAGGELFDRIVAKGHYSEEREAVKL IKTIVGVVEACHSLGVMHRDLKPENFLFSDPADDAILKATDFGLSIFYKPGQYFSDVVGSPYY  
VAPEVLCKYYGPEVDIWSAGVILYILLSGVPPFWAETESGIFRQILHGKIDFASEPWPSISDSAKDLIRKMLERDPRQRISAHEVLCHPWIVDDRVPDK  
PLDSAVLSRLKQFSAMNKLKLMALRVIAERLSEEEIGGLKELFKMIDTNSGTITFQELKDGKLVGSELMESEIKSLMEAVNIPS\*

>Thecc1EG036367 Org\_Tcacao peptide: Thecc1EG036367t3 Calcium-dependent protein kinase 2 (81%P)  
(PAC:27458878)

MNKKTNSSSSSSTTKPAGTVLPYQT PRLRDHYLLGKLLGQGGQFGTTYQCTHKATGTYACKSI PRRKLLCREDYDDVWREIQIMHLLSEHPSVVQIKGT  
YEDSVFVHLMELCAGGELFDRIVAKGHYSEEREAVKL IKTIVGVVEACHSLGVMHRDLKPENFLFSDPADDAILKATDFGLSIFYKPGQYFSDVVGSPYY  
VAPEVLCKYYGPEVDIWSAGVILYILLSGVPPFWAETESGIFRQILHGKIDFASEPWPSISDSAKDLIRKMLERDPRQRISAHEVLCHPWIVDDRVPDK  
PLDSAVLSRLKQFSAMNKLKLMALRVIAERLSEEEIGGLKELFKMIDTNSGTITFQELKDGKLVGSELMESEIKSLMEAADIDNSGTIDYGEFLAATL  
HINKMEREENLVAAFSFFDKDGSYITIDELQONACKEFGLGDVHLDemiKEIDQDNDGRIDYGEFT

>Thecc1EG036367 Org\_Tcacao peptide: Thecc1EG036367t4 Calcium-dependent protein kinase 2 (81%P)  
(PAC:27458880)

MNKKTNSSSSSSTTKPAGTVLPYQT PRLRDHYLLGKLLGQGGQFGTTYQCTHKATGTYACKSI PRRKLLCREDYDDVWREIQIMHLLSEHPSVVQIKGT  
YEDSVFVHLMELCAGGELFDRIVAKGHYSEEREAVKL IKTIVGVVEACHSLGVMHRDLKPENFLFSDPADDAILKATDFGLSIFYKPGQYFSDVVGSPYY  
VAPEVLCKYYGPEVDIWSAGVILYILLSGVPPFWAETESGIFRQILHGKIDFASEPWPSISDSAKDLIRKMLERDPRQRISAHEVLCHPWIVDDRVPDK  
PLDSAVLSRLKQFSAMNKLKLMALRVIAERLSEEEIGGLKELFKMIDTNSGTITFQELKDGKLVGSELMESEIKSLMEAVNIPS\*

>Thecc1EG040717 Org\_Tcacao peptide: Thecc1EG040717t1 Calcium-dependent protein kinase 19 (87%T)  
(PAC:27430665)

MGNCCATPGSPVQSNKKGKNKNKANPFFGDYAVTNGSATTFKLRVLKEPTGHDISAQYDLGRELGRGEFVTVYLTCTDVSSGDKFACKSISKKLLRTAVD  
IEDVRREVQIMKHLPKHPNIVSLKDYEDDDAVHIVMELCEGGELFDRIVARGHYTERAAAGVMRTIVEVVQMCHKHGMHRDLKPENFLFANKKETAPL  
KAIDFGLSVFFFKPGERFNEIVGSPYYMAPEVLKRNYPGEVDVWSAGVILYILLCGVPPFWAETEQQVAQAI IRSVIDFKRDPWPVKVSDNAKDLVRKMLNP  
DPKQRLTAQEVLEHPWLQNAKKAPNVLGETVKARLKQFSVMNKLKRALRVIAEHLSEEVAGIKEAFKMDTRKQKINLDELRLMGLQKLGQQIPDAD  
LQILMEAADVDGDTLNYGEFVAVSVHLKKMANDEHLKKAFAFFDLNKSGLYIEIEDLRDALNDEVDTSSSEVIDAIMHDVDTDKDGRISYEEFVAMMKAG  
TDWRKASRQYSRERFNSLSLKLMDRGSLLAN\*

>Thecc1EG040717 Org\_Tcacao peptide: Thecc1EG040717t2 Calcium-dependent protein kinase 19 (87%T)  
(PAC:27430666)

MELCEGGELFDRIVARGHYTERAAAGVMRTIVEVVQMCHKHGMHRDLKPENFLFANKKETAPLKAIDFGLSVFFFKPGERFNEIVGSPYYMAPEVLKRN  
Y GPEVDVWSAGVILYILLCGVPPFWAETEQQVAQAI IRSVIDFKRDPWPVKVSDNAKDLVRKMLNPDPKQRLTAQEVLEHPWLQNAKKAPNVLGETVKARL  
KQFSVMNKLKRALRVIAEHLSEEVAGIKEAFKMDTRKQKINLDELRLMGLQKLGQQIPDADLQILMEAADVDGDTLNYGEFVAVSVHLKKMANDEH  
LHKAFAFFDLNKSGLYIEIEDLRDALNDEVDTSSSEVIDAIMHDVDTDKDGRISYEEFVAMMKAGTDWRKASRQYSRE

>Thecc1EG040893 Org\_Tcacao peptide: Thecc1EG040893t1 Calcium-dependent protein kinase 17 (83%T)  
(PAC:27426008)

MGNCCSRGNPAGAPNTNEKGDATPDNNGNPNSSSLQDSSANNPPRHSQSPSPGASSKPKPNPIGPVLGRPMEDIKSTYITIGKELGRGQFGVTHLCTN  
KATGEQFACTIAKRKLVNKEDIEDVRREVQIMHHLTGQPNIVELKAYEDKHSVHLMELCAGGELFDRIVAKGHYTERAAASLLRTIVQIVHTCHSMG  
VIHRDLKPENFLLLNKDENSPLKATDFGLSVFYKPEGVFKDIVGSAIYAPEVLKRRYGPEDAIWSIGVMYIILLSGVPPFWAEEHGI FNAILRGHIDF  
TSDPWPSISHQAKDLVRKMLNSDPKQRLTAIQVLSHPWIKEDGEAPDTPLDNAVLRTRKQFKAMNFKKVALRVIAAGCLSEEEIMGLKEMFRGMDTNSG  
TITLLEELKQGLAKQGTKLSEYEVKQLMEEAADADNGTIDYDEFITATMHNMRDREDHLYHAFQHFDKDNGSYITTELEQVLRREYGMHDGRDIKEILSE  
VDSNDGRINYDEFVAMMRKGNPETNPKRRDVFV\*

>Thecc1EG044380 Org\_Tcacao peptide: Thecc1EG044380t1 Calcium dependent protein kinase 1 (82%T)  
(PAC:27442713)

MGNSCVGPISKNGFFQSVSAAMWRSRIPDSDSVSHNTGETGSEVASKEPESPLVQNKPPQVTPMPKPKPENKPKETNPEKSPKPSPHMKRVSSAGLR  
TESVLQRKTGNFKEYSLSLGRKLGQGGQFGTFLCVEKATGKEYACKSI AKRKLVTDDVEDVRREIQIMHLLAGHPNVISIKGAYEDAVAVHLMELCAGG  
ELFDRIVQRGHYTERKAAALTRTIVGVVEACHSLGVMHRDLKPENFLFVQVEDSLLKIDFGLSIFYKPGKFTDVVGSPYYVAPEVLKRYGPEADVW  
SAGVILYILLSGVPPFWAEESEQGFIFEQVVLHGDLD FESDPWPSISESAKDLVRRMLVRP RRRLTAHEVLCHPWIQIDGVAPDKALDSAVLSRMKQFSAMN  
KLKLMALRVIAESLSEEEIAGLKEMFKMIDTNSGQITFEELKAGLKRVGANLKESEIYDLMKAADVNSGTIDYGEFVAATLHLNKIEREDHLFAAFSY  
FDKDGSGYITPDELQACEEFGIEDVRLEEMIREVDQDNDGRIDYNEFVAMMQGNLASNVAGAGKGLQNSFSIGFREALKL\*

Note that the below sequence corresponds to the representative gene model and not the queried gene model.

>AT1G08650.1 | Symbols:PPCK1,ATPPCK1 | phosphoenolpyruvate carboxylase kinase 1,PHOSPHOENOLPYRUVATE  
CARBOXYLASE KINASE 1 | Chr1:2752206-2753232 FORWARD LENGTH=284  
MTCSQTLGNNNTNKYICEEIGRGRFGTVSRVYAPATGDFACKTIDKASLSDDLDRACLDNEPKMLALLSYHPNVIQIHDLIDTSTLSIFMELVHPSV



SIYDRLVSSGTFEPQATASFQKILQALSHCHRYGVVHRDIKPENILVDLRNDTVKICDFGSGIWLGEGETTEGVVGTPTYVVAPEVLMGYSYGEKVDLWS  
AGVVLVYMLAGTTPPFYGETAEIEFEAVLRGNLRFPTKIFRGVSSMAKDFLRKLICKDASRRFSAEQALRHPWIQRAGETEERFI  
>AT1G35670.1 | Symbols:ATCDPK2,ATCPK11,CDPK2,CPK11 | calcium-dependent protein kinase 2 |  
Chr1:13205456-13208058 FORWARD LENGTH=495  
METKPNRRPSNTVLPYQTPRLRDHYLLGKKGQGGFTTYLCTEKSTSANYACKSIPKRKLVCREDYEDVWREIQIMHHLSEHPNVVRIKGTYESVVFV  
HIVMEVCEGGELFDRIVSKGHFSEBAVKLIKTIILGVVEACHSLGVMHRDLKPENFLFDSPKDDAKLKATDFGLSVFYKPGQYLYDVVGSFYVVAPEVLK  
KCYGPEIDVWSAGVILYILLSGVPPFWAETESGIFRQILQGKLDKPSDPWPTISEAAKDLIYKMLERSPKKRISAEHALCHPWIVDEQAAPDKPLDPAVL  
SRLKQFSQMNKIKKMLALRVAERLSEEEIGGLKELFKMIDTDNSGTITFEELKAGLKRVGSELMESEIKSLMDAADIDNSGTIDYGEFLAATLHMNMKMER  
EENLVAAFSYFDKDGSGYITIDELQSACTEFGLCDTPLDDMIKEIDLNDGKIDFSEFTAMMRKGDGVRGSRMTMMKNLNFNIADAFGVDGEEKSDD  
>AT1G50700.1 | Symbols:CPK33 | calcium-dependent protein kinase 33 | Chr1:18782214-18784385 FORWARD  
LENGTH=521  
MGNCCLAKKYGLVMKPPQNGERSVEIENRRRSTHQDPSKISTGTNQPWPWRNPAKHSGAAAILEKPYEDVKLFYTLKSKELGRGQFVYTLCTEKSTGKRFA  
CKSISKKKLVTKGDKEDMREIQIMQHLSGQPNIVEFKGAYEDEKAVNLVMELCAGGELFDRILAKGHYSERAAASVCRQIVNVVNICHFMGVMHRDLKP  
ENFLSSKDEKALIKATDFGLSVFIEEGRVYKDIVGSAYVVAPEVLKRRYKKEIDIWSAGIILYILLSGVPPFWAETEKGIFDAILEGEIDFESQPWPSI  
SNSAKDLVRMLTQDPKRRISAAEVLKHPWLREGGEASDKPIDS AVLSRMKQFRAMNKLKLLKLVIAENIDTEEIQGLKAMFANIDTNSGTITTYEELK  
EGLAKLGSRLTEAEVKQLMDAADVDGNGSIDYIEFITATMHRHRLESNENYKAFQHFDDKDGSGYITTDELEAALKEYGMGDDATIKEILSDVDADNDGR  
INDEFCCAMMRSGNPQQPRLF  
>AT1G74740.1 | Symbols:ATCPK30,CPK30,CDPK1A | CALCIUM-DEPENDENT PROTEIN KINASE 1A,calcium-dependent  
protein kinase 30 | Chr1:28080199-28082476 REVERSE LENGTH=541  
MGNCIACVKFDPDNSKPNQKKKPPRGRQRNPYDDPDGLRTHAPLRVIMPMSHQSQISDKYILGRELGRGFEFGITYLCTDRETREALACKSISKRKLRTAVD  
VEDVRREVTIMSTLPEHPNVVVKLKYEDNENVHVMELCEGGELFDRIVARGHYTERAAATVARTIAEVVMCHVNGVMHRDLKPENFLFANKKENSAL  
KAIDFGLSVLFKPGERFTEIVGSPYMAPEVLKRNYPGEVDVWSAGVILYILLCGVPPFWAETEQQVALAILRGVLDKFRDPWSQISSESAKSLVKQMLEP  
DSTKRLTAQQVLDHPWIQNAKAPNVPLGDIVRSRLKQFSMMNRLKKAALRVIAEHLISIQEVEVIRNMFMTLMDDDNDGKISYLELRAGLRKRVGSQLGEPE  
IKLLMEVADVNGNGCLDYGEFVAVI IHLQKMEDEHFRQAFMFFDKDGSGYIESEELREALTDELGEPDINSVIIDIMREVDTDKDGKINYDEFVMMKAG  
TDWRKASRQYSRERFKSLSLNLMDKGSMLHLDALTGQSIIV  
>AT1G76040.2 | Symbols:CPK29 | calcium-dependent protein kinase 29 | Chr1:28537743-28540448 FORWARD  
LENGTH=561  
MLQNQHKTTKNQRNKNIGTKYFLRKKIMGFCFSKFGKSQTHEIPISSSSDSSPPHHYQPLPKPTVVSQGGTSNPTSNPQPKPKPAPPPPPSTSSGSQIGPI  
LNRPMIDLSALYDLHKLGRGQFGITYKCTDKSNGREYACKSISKRKLIRKDIEDVRREVMILQHLTGQPNIVEFRGAYEDKDNLHLMELCSGGELFD  
RIIKKGSYSEKAAANIFRQIVNVVHVCHFMGVVHRDLKPENFLVSNEDSPKATDFGLSVFIEEGKVYRDIVGSAYVVAPEVLHRYNKEIDVWSAGV  
MLYILLSGVPPFWGETEKTIFEAILGKLDLETSWPPTISESAKDLIRKMLIRDPKKRITAAEALEHPWMTDTKISDKPINSAVLVRMKQFRAMNKLKLL  
ALKVIAENLSEEEIKGLKQTFKNMMDTDESGTITFDELNRGLHRLGSKLSEIKQLMEAADVDKSGTIDYIEFVATMHRHRLEKEENLIEAFKYFDKDR  
SGFITRDELKHSMTTEYGMGDDATIDEVINDVDTDNDGRINYEYEFVAMMRKGTDSDPKLR  
>AT2G17290.1 | Symbols:CPK6,ATCDPK3,ATCPK6 | ARABIDOPSIS THALIANA CALCIUM-DEPENDENT PROTEIN KINASE  
6,ARABIDOPSIS THALIANA CALMODULIN-DOMAIN PROTEIN KINASE 3,calcium dependent protein kinase 6 |  
Chr2:7517005-7519239 FORWARD LENGTH=544  
MGNSCRGFSFKDKIYEGNHSRPEENSKSTTTTVSSVHSPTDQDFSKQNTN PALVIVKPEIMRRNVNDQSYVVLGHKTPNIRDLYTLRKLKGGQFGTTY  
LCTDIATGVYACKSISKRKLISKEDVEDVRREIQIMHHLGAGKNIIVTIKAYEDPLYVHIVMELCAGGELFDRIIHRGHYSERKAAELTKIIVGVVEAC  
HSLGVMHRDLKPENFLLVNKDDDFSLKAIIDFGLSVFFKPGQIFKDVVGSFYVVAPEVLLKHYGPEADVWTAGVILYILLSGVPPFWAETQQGIFDAVLK  
YIDFDTPWPVVISDSAKDLIRKMLCSPSERLTAHEVLRHPWICENGVAPDRALPAVLSRLKQFSAMNKLKMKALVIAESLSEEEIAGLRAMFEAMDT  
DNSGAIITFDELKAGLRRYGTGLKDEIRDLMEAADVNSGTIDYSEFIAATIHNLKLEREEHLVSAFYFDKDGSGYITIDELQQSCIEHGMDTVFLEDI  
IKEVDQDNDGRIDYEEFVAMMQKGNAGVGRRTMKNLSNIMRSDV  
>AT2G31500.1 | Symbols:CPK24 | calcium-dependent protein kinase 24 | Chr2:13414016-13416324 FORWARD  
LENGTH=582  
MGSCVSSPLKGSFPFKRPVRRRHSNSRTSSVPRFDSSTNLSRRLIFQPPSRVLPPEPIGDGIHLKYDLGKELGRGFEFGVTHECIEISTRERFACKRISKE  
KLRTIEDVEDVRREVEIMRCLPKHPNIVSFKEAFEDKDAVYLVMEICEGGELFDRIVSRGHYTERAAASVAKTILEVVKVCEHGVVHRDLKPENFLFSN  
GTETAQLKAIIDFGLSIFFKPAQRFNIEVGSFYMAPEVLRNRYGPEIDVWSAGVILYILLCGVPPFWAETEEGIAHAIVRGNIDFERDPWPKVSHEAKEL  
VKNMLDANPYSRLTQVEVLEHPWIRNAERAPNVNLGDNVTRTKIQFLLMNRFKKKVLRIVADNLPNEEIAAIVQMFQTMDDTKNGHLLTFEELRDGLKKG  
QVVPDGDVKNMLMDAADTDGNGMGLSCDEFVTLIHLKRMGCDEHLQEAIFYFDKNGNGFIELDELKVALCDDKLGHANGNDQWIKDIFFDVLDLNDKGRISF  
DEFKAMMKSQTDWKMASRQYSRALLNALSIKMFKEDFDGNGPKSHSMEFPPIARKRAKLLDAPKNKSMELQISKTYKPSGLRN  
>AT2G35890.1 | Symbols:CPK25 | calcium-dependent protein kinase 25 | Chr2:15067175-15069136 REVERSE  
LENGTH=520  
MGNVCMVNVNVCVDTKSNSWVRPTDLIMDHPLKPLQDKPPQMLMKNKDDDKTKLNDTHGDPKLEGGKPKAQKQTSQGGGRRKCSDEEYKRAIACANS  
KRKAHNVRRLMSAGLQAESVLKTKTGHKKEYNLGSKLGHGQFGTTFVCKVEKGTGEEYACKSIPKRKLENEEDVEDVRREIEIMKHLGQPNVISIKGAY  
EDSVAVHVMELCRGGELFDRIVERGHYSERKAAHLAKVILGVVQTCBSLGMHRDLKPENFLVNDDEDSPLKAIIDFGLSMFLKPGENFTDVVGSFYI  
APEVLNKNYGEADIWSAGVMIYVLLSGSAPFWGETEIEIFNEVLEGELEDLTSDPWPQVSESADLIRKMLERNPIQLRTAQVVLCHPWIRDEGNAPDTP  
LDTTVLSRLKFKSATDKLKMALRVAERLSEEEIHELRETFKTDISGKSGRVTYKELKNGLERFNTNLDNSDINSMLQIPTDVHLEDITVDYNEFIEAIV  
RLRQIQEEEEANDRLESSTKV  
>AT2G41860.1 | Symbols:CPK14 | calcium-dependent protein kinase 14 | Chr2:17467646-17469786 REVERSE  
LENGTH=530  
MGNCCTAGSLIQDKQKGFKLPPNPFNSNEYGNHHDGLKLIIVLKEPTGHEIKQKYKLGRELGRGFEFGVYTLCTEIEETGEIFACKSILKKLKTSIDIEDVK  
REVEIMRQMPHEHPNIVTLKETIEDDKAVHLMELCEGGELFDRIVARGHYTERAAASVIKTIIEVVQMCHKHGMHRDLKPENFLFANKKETASLKAIDF  
GLSVFFKGERFNEIVGSPYMAPEVLRNRYGQEIDIWSAGVILYILLCGVPPFWAETEHEGVAKAILKSVIDFKRDPWPKVSDNAKDLIKMLHPDPRR  
LTAQQVLDHPWIQNGKNASVLSGETVRRARLKQFSVMNKLKRALRVIAEHLSEETSCIKERFQVMDTNSRGTITITELGIGLQKLGIVVPPQDDIQILM  
DAGVDKDGYLVDNEFVAISVHIRKLGNDHEHLKKAFTFFDKNKSQYIEIEELRDALADDVDTTSEEVVEAIIILDVDTNKDGKISYDEFATMMKTGTDRK

ASRQYSRDLFKCLSLKMQDGLSQSNGDTK  
>AT2G46700.1 | Symbols:CRK3,ATCRK3 | CDPK-related kinase 3 | Chr2:19182968-19186430 REVERSE LENGTH=595  
MGQCYGKVNQSKQNGEENANNTTYVVSVDGNQIQPLTPVNYGRAKNTPARSSNPSFWPSPFPHGASPLSPGVSPPARTSTPRRFFRRFPFPPSPAKHI  
KASLIKRLGVKPKKEGPIPEERGTETEPEQSLDKSFGYKGNFNGAKYELGKEVGRGHFGHTCSGRGKGDIDKHPHIAVKIISKAKMTTAAIAIEDVRRVKKLKS  
LSGHKYLKYYDACEDANNVYIVMELCDGGELLDRIILARGGKYPEDDAKAIIVVQILTVVSFCHLQGVVHRDLKPENFLFTSSREDSDLKLIIDFGLSDFIR  
PDERLNDIVGSAYYVAPEVLHRSYSLEADIWSIGVITYIILCGSRPFWARTESGIFRTVLRTEPNYDDVPWPCSSEKGFVKRLLNKDYRKRMSAVQAL  
THPWLRDSDRVIPLDLIYKLVKAYLHATPLRRAALKALAKALTENELVYLAQFMLLGNPKDGSVLENFKTALMQNATDAMRESRVPEILHTMESLAY  
RKMYFEEFCAAASISIHQLEAVDAWEEIATAGFQHFETEGNRVITIEELARELNVGASAYGHLRWDVRRSSDGKLSYLGFTTKFLHGVTLRAAHARPR  
>AT3G10660.1 | Symbols:ATCPK2,CPK2 | calmodulin-domain protein kinase cdkp isoform 2 | Chr3:3331599-  
3334268 REVERSE LENGTH=646  
MGNACVGPNI SGNGFLQTVTAAMWRPRIGAEQASSSSHNGNQVSKAEASEPATDQVQNKPEPITMPSSKTNPETKLPDLEIQPEEKKEKVLAEETKQK  
VVPEESKQEVPPPEESKREVVVQPEAKPETKSESKPETTKPETTSETKPKETKAEQPKPKHMRRVSSAGLRTESVLQRKTENFKEFYSLGRKLGQGFQGT  
FLCLEKGTGNEYACKSISKRLLTDEVDVREIQIMHHLAGHPNVISIKGAYEDVAVHLVMEELCSGGELFDRIIQRGHYTERKAAELARTIVGVLEA  
CHSLGMVHRDLKPENFLVFSREEDSLKTIIDFGLSMFFKPEDEVFTDVVGSFYVAPEVLKRYGPESDVWSAGVIVYILLSGVPPFWAETEQQIFEQVLH  
GDLDFSSDPWPSISESAKDLVLRMLVDPKRRRLTAHQVLCHPWQIDGVAPEKPLDSAVLSRMKQFSAMNKFKKMALRVAESLSEEEIAGLQKMFKMI  
ADNSGQITFEELKAGLKRVGANLKESEILDLMDQAADVDSGTIDYKEFIAATLHLNKIEREDHLFAAFSYFDKDESGFITPDELQQACEEFGVEDARIEE  
MMRDVDQDKGRIDYNEFVAMMQKGSIMGGPVKMGLENSISISLKH  
>AT3G20410.1 | Symbols:CPK9 | calmodulin-domain protein kinase 9 | Chr3:7116388-7118824 FORWARD  
LENGTH=541  
MGNCFANKHGLMKPQQNGNTRSEVGVTVNDQPPSYTPQARTTQQPEKPGSVNSQPPPWAAAAAPGLSPKTTTKSNSILENAFEDVKLFYTLGKELGRG  
QFGVYTLCTENSTGKYYACKSISKKLVTKADKDDMRREIQIMQHLSGQPNIVEFKGAYEDEKAVNLVMEELCAGGELFDRIIAKGHYTERAAASVCRQIV  
NVVKICHFMGLVHRDLKPENFLSSKDEKALIKATDFGLSVFIEEGKVYRDI VGSAYYVAPEVLRRRYKGEVDIWSAGIILYILLSGVPPFWAETEKGIF  
DAILEGHIDFESQPWPSISSAKDLVRRMLTADPKRRISAADVLQHPWLREGGEASDKPIDSAVLSRMKQFRAMNKLKALKVAENIDTEEIQGLKAM  
FANIDTDSNGTITYEELKEGLAKLGSKLTEAEVKQLMDAADVDGNGSIDYIEFITATMHRHRLESNENLYKAFQHFQDKDSSGYITIDELESALKEYGMGD  
DATIKEVLSDVSDNDGRINYEFCAMMRSGNPQQQPRLF  
>AT3G51850.1 | Symbols:CPK13 | calcium-dependent protein kinase 13 | Chr3:19232667-19235526 FORWARD  
LENGTH=528  
MGNCCRSPAAVAREDVKSNSYSGHDHARKDAAGGKKSAPIRVLSDVPKENIEDRYLLDRELGRGEFGVYTYLCIERSSRDLACKSISKRKLRTAVDIEDVK  
REVAIMKHLPKSSIVTLKEACEDDNAVHLVMEELCEGELFDRIIVARGHYTERAAAGVTKTIVEVVQLCHKHGVHRDLKPENFLFANKKENSPLKAIDF  
GLSIFFKPGEKFSEIVGSPYMAPEVLKRNYPGEIDIVSAGVILYILLCGVPPFWAEESEQVAQAILRGVIDFKREPWPNISETAKNLVQRMLEPDPKRR  
LTAKQVLEHPWQNAKAPNVPLGDVVKSRLKQFSVMNRFRKALRVIAEFLSTEEVEDIKVMFNKMDTDNDGIVSIEELKAGLRDFSTQAESEVQMLI  
EAVDTKGGKGLDYGEFVAVSLHLQKVANDEHLRKAFSYFDKDGNGYILPQELCDALKEDGGDDCVDVANDIQFQVDTDKDGRISYEEFAAMMKTGTDWRK  
ASRHSRGRFNSLSIKMLKDGSLNLGNE  
>AT3G57530.1 | Symbols:ATCPK32,CPK32,CDPK32 | calcium-dependent protein kinase 32 | Chr3:21296898-  
21299351 REVERSE LENGTH=538  
MGNCCGTAGSLAQNDNKPKKGRKKQNPFSIDYGLHHGGDGGGRPLKLIIVLNDPTGREIESKYTLGRELGRGEFGVYTYLCTDKETDDVFACKSILKKL  
TAVDIEDVREVEIMRHMPEHPNVTLKETYEDEHAVHLVMEELCEGELFDRIIVARGHYTERAAAATVTKTIVEVVQVCHKHGMVHRDLKPENFLFGNKKE  
TAPLKAIDFGLSVFVKPGERFNEIVGSPYMAPEVLKRNYPGEVDIWSAGVILYILLCGVPPFWAETEQQVAQAIIRSVLDFRRDPWPKVSENAKDLIRK  
MLDPPQKRRLTAQQVLDHPWLQNAKTAPNVSLGETVRRARLKQFTVMNKLKRALRVIAEHLSDDEASGIREGFQIMDTSQRKINIDELKIGLQKLGHAI  
PQDDLQILMDAGDIDRDGYLDCDEFI AISVHLRKMGNDEHLKKAFAFFDQNNNGYIEIEELREALSDELGTSEEVDVAIIRDVDTDKDGRI SYEEFVTMM  
KTGTDWRKASRQYSRERFNSISLKLMDQASLQVNGDTR  
>AT4G04695.1 | Symbols:CPK31 | calcium-dependent protein kinase 31 | Chr4:2381634-2383996 REVERSE  
LENGTH=484  
MGCYSKSNLQSKRTILEKPFVDIGKVYIILGDELQGGQFGITRCKVEKTSKGYTACKTILKTNLKSREDEEAVKREIRIMKHLSGEPNIVEFKKAYEDRD  
SVHIVMEYCGGELFKKIEALSKDGKSYSEKAEVIRIPVNVVKNCHYMGVMLRDLKPENFLSSTDKNATVKAIDFGCSVFIIEGKVVYQDLGSDYYI  
APEVLQGGYKGEADIWSAGIILYIILCGKPPFVTEPEAQMFSEIKSAKIDVDSWKFI DVKAKHLVNRMLNRNPKERISAAEVLGHPWPKDGEASDKPI  
DGVVLSRLKQFRDMNKLKVALKVAANLSEEEIKGLKTLFTNIDTDKSGITILEELKTLGLTRLGNSLSKTEVEQLMEAADVDGNGTIDIDEFISATMHR  
YRLDRDDHVYQAFQHFQDKDNDGHI TKEELEMAMKEHGVGDEVSIKQIITEVDTDNDGKINFEFRTMMRSGSSLPQRELLPIK  
>AT4G04700.1 | Symbols:CPK27 | calcium-dependent protein kinase 27 | Chr4:2385276-2387986 REVERSE  
LENGTH=485  
MGCFSKELQSKRTILEKPLVDITKIYIILGEEELGRGNFGLTRCKVEKSTGKTFAKTIILKTKLKDEEEDVVKREIRIMKQLSGEPNIVEFKNAYEDKD  
SVHIVMEYCGGELYDKILALYDVGKSYSEKAEAGIIRSVNVVKNCHYMGVMLRDLKPENFLSSTNDNATVKAIDFGCSVFIIEGKVVYQDLGSDYYI  
APEVLQGGYKGEADIWSAGIILYIILCGKSPFVKEPEGQMFNEIKSLEIDYSEEPWPLRDSRAIHLVLRMLDRNPKERISAAEVLGHPWPKDGEASDKPI  
DGVVLSRLKQFRDANKFKKVVLFKIAANLSEEEIKGLKTLFTNIDTDKSGNITILEELKTLGLTRLGNSLSKTEVEQLMEAADMDGNGTIDIDEFISATMHR  
YKLDREHVYKAFQHFQDKDNDGHI TKEELEMAMKEDGAGDEGSIKQIADADTDNDGKINFEFRTMMRTESSLQPEGELLPIIN  
>AT4G04710.1 | Symbols:CPK22 | calcium-dependent protein kinase 22 | Chr4:2390497-2392887 REVERSE  
LENGTH=498  
MGNCCGSKPLTASDIVSDQKQETILGKPLEDIKHHYSFGDELGKGNFGTTLCKENSTGKSYACKSIPKRTLSSEEEKAEVKTIEQIMDHVSGQPNIVQI  
KGSYEDNNSIHIVMEELCGGELFDKIDALVKSHSYSEKDAAGIFRSIVNAVVKICHSLDVVHRDLKPENFLFSSKDENAMLKAIDFGCSVYIIEGKTFER  
VVGSKYYIAPEVLEGSYKEDIWSAGVILYILLSGVPPFGTIGIESIIVSTLCIVDAEIKECRLDFESQPWPLISFKAKHLIGKMLTKKPKERISAADVL  
EHPWPKSEAPDKPIDNVVLSRMKQFRAMNKLKALKVAEGLSEEEIKGLKTFMFMNDMDKSGSITYEELKMGMLNRHGSKLSSETVQKQMEAADVDGNG  
TIDYIEFISATMHRRLERDEHLYKAFQYFDKDGSGHITKEEVEIAMKEHGMGDEANAKDLISEFDKNDGKIDYEEFCTMMRNGILQPPQKLVGIHI  
>AT4G04720.1 | Symbols:AtCPK21,CPK21 | calcium-dependent protein kinase 21 | Chr4:2394817-2397631  
REVERSE LENGTH=531  
MGCFSKSKRKTQNDGGEKSIPIPNVQTHVPEHRKQPTPTPKPMTQPIHQIISTPSSNPVSVRDPDITLGPFPEDIRKFYSLGKELGRGQFGITYMCKEI

GTGNTYACKSILKRKLLISKQDKEDVVKREIQIMQYLSGQPNIVEIKGAYEDRQSIHLVLMELCAGGELFDRIIAQGHYSERAAAAGIIRSVNVVQICHFMGV  
VHRDLKPFENFLSSKEENAMKATDFGLSVFIEEGKYRVIDVGSAYVAPEVLRSSYKGEIDIWSAGVILYLLSGVPPFWAENEKGFIDEVIKGEIDFV  
SEPWPSISESAKDLVRKMLTKDPKRRITAAQVLEHPWIKGGEAPDKPIDSTVLSRMKQFRAMNKLKLLKLVIAESLSEEEIKGLKTMFANIDTKSGTI  
TYEELKTLGRLGSRSETEVKQLMEAADVDGNGTIDYEFISATMHRYLKDRDEHVYKAFQHFQDKDNGSHITRDELESAMKEYGMGDEASIKEVISEVD  
TDNDGRINFEFECAMMRSGSTQPGKLLPFH  
>AT4G04740.2 | Symbols:CPK23,ATCPK23 | calcium-dependent protein kinase 23 | Chr4:2404883-2408493  
REVERSE LENGTH=533  
MGCFFSSKHKRKTQNDGGERSIPIIPVQTHIVDQVPDHRKQIPSPSIPISVRDPETILGKPFEDIRKFYSLGRELGRGGLGITYMCKEIGTGNLYACKSI  
LKRKLISELGREDVKTEIQIMQHLSGQPNVVEIKGSYEDRHSVHLVLMELCAGGELFDRIIAQGHYSERAAAAGTIKSIIVDVVQICHNLGVIHRDLKPFENFL  
FSSKEENAMKLVTDVGLSAFIEEGKIYKDVVGSPPYVAPEVLRQSYKGEIDIWSAGVILYLLCGVPPFWADNEEGVFVEILKCKIDFVREPWPSISDSA  
KDLVEKMLTEDPKRRIATAQVLEHPWIKGGEAPEKPIDSTVLSRMKQFRAMNKLKLLKLVIAESLSEEEIKGLKTLFANMDTRNSGTITYEQLQTLGSLR  
LRSRLSETEVQQLVEASDVGDNGTIDYEFISATMHRYLKHHDEHVHKAQFHLDDKNGHITRDELESAMKEYGMGDEASIKEVISEVDTDNALSPVEIM  
REVALEIGVPVNTFKQNNVQEDGLYLPVLNNA  
>AT4G09570.1 | Symbols:CPK4,ATCPK4 | calcium-dependent protein kinase 4 | Chr4:6049560-6052184 FORWARD  
LENGTH=501  
MEKPNPRRPNSSVLPYETPRLRDHYLLGKKGQGGFTTYLCTEKSSSANYACKSIPKRLKVCREDYEDVWREIQIMHHLSEHPNVVRIKGTYESVVFVH  
IVMEVCEGGEELFDRIIVSKGCFSEREAALIKTILGVVEACHSLGMHRDLKPFENFLFDSPSDDAKLKATDFGLSVFYKPGQYLDVVGSPYYVAPEVLK  
CYGPEIDVWSAGVILYLLSGVPPFWAETESGIFRQILQKIDFKSDPPTISEGAKDLIYKMLDRSPKRIISAHEALCHPWIDEHAAPDKPLDPVLS  
RLKQFSQMNKIKKMLARVIAERLSEEEIGLKELFKMIDTNSGTITFEELKAGLRVGSSELMESEIKSLMDAADIENSGTIDYGEFLAATLHINKMERE  
ENLVVAFSYFDKDGSGYITIDELQQACTEFLGCDTPLDDMIKEIDLNDNGKIDFSEFTAMMKKGDGVRSRTRMNNLNFNIAEAFGVEDTSSTAKSDDSP  
K  
>AT4G21940.2 | Symbols:CPK15 | calcium-dependent protein kinase 15 | Chr4:11640847-11643487 FORWARD  
LENGTH=561  
MGCFFSSKHRNTESDIINGSVQSSIPTNQPENHVSVDLKPQKPPSPQIPTTTQSNHHHQEESKPVNQIEKKHVLTPQLKPIVRETETILGKPFEEIRK  
LYTLGKELGRGQFGITYTCKENSTGNTYACKSILKRKLRKQDIDDVKREIQIMQYLSGQENIVEIKGAYEDRQSIHLVLMELCGGSELFDRIIAQGHYSE  
KAAAGVIRSVNVVQICHFMGVIHRDLKPFENFLASTDENAMKATDFGLSVFIEEGKYRVIDVGSAYVAPEVLRSSYKGEIDIWSAGIILYLLCGVP  
PFWSETEKGFINEITKGEIDFDSQPWPSISSESAKDLVRKLLTKDPKQRI SAAQALEHPWIRGGEAPDKPIDSAVLSRMKQFRAMNKLKLLKLVIAESLS  
EEEIKGLKTMFANMDTKSGTITYEELKNGLAKLGSKLTEAEVKQLMEAADVDGNGTIDYEFISATMHRYRFDRDEHVFKAFQYFDKDNDSGFITMDELE  
SAMKEYGMGDEASIKEVIAEVDTDNDGRINYEFCAMMRSGITLPGQKILPPCKRVADLN  
>AT4G23650.1 | Symbols:CDPK6,AtCDPK6,CPK3 | Calcium dependent protein kinase 3,calcium-dependent  
protein kinase 6 | Chr4:12324967-12327415 REVERSE LENGTH=529  
MGHRHSKSKSSDPPSSSSSSSSGNVVHVKPAGERRGSSSGSGTGVSSGSGTGGSRSTTSTQQNGRILGRPMEEVRRTYEFGRELGRGQFGVTVLVTHKET  
KQQVACKSIPTRRLVHKDDIEDVREVVQIMHHLSGHRNIVDLKAYEDRHSVNLIMELCEGGEELFDRIISKGLYSERAAADLCRQMVVHVSCHSMGMVMH  
RDLKPFENFLFLSKDENSLKATDFGLSVFFKPGDKFDLVGSAYVAPEVLRKRYGPEADIIWSAGVILYLLSGVPPFWGNETGIFDAIILQQLDFSD  
PWPALSDGAKDLVRKMLKYDPKDRLTAAEVLNHPWIREDGEASDKPLDNAVLSRMKQFRAMNKLKLMALKLVIAENLSEEEIIGLKEMFKSLDNDNGIVT  
LEELRTGLPKLGSKISEAEIRQLMEAADMDGDSIDYLEFISATMHRNRIEREDHLYTAFQFFDNDNSGYITMEELELAMKKNMGDDKSIKEIIAEVDT  
DRDGKINYEFEVAMMKKNPELVPNRRRM  
>AT4G35310.1 | Symbols:CPK5,ATCPK5 | calmodulin-domain protein kinase 5 | Chr4:16802436-16804628  
FORWARD LENGTH=556  
MGNSCRGSFKDKLDEGDNKPEDYSKTSTNLSSNSDHSNPAADI IAQEFKDNNSNNNSKDPALVIPLEPIMRRNPDNQAYVVLGHKTPNIRDIYTL  
RKLQGGQFGTITLCTEIASGVYACKSISKRKLISKEDVDVREIQIMHHLGAGHSIVTIKAYEDSLYVHIVMELCAGGELFDRIIQRGHYSERKAAE  
LTKIIVGVVEACHSLGMHRDLKPFENFLVNKDDDFSLKAIDFGLSVFFKPGQIFTDVVGSPYYVAPEVLLKRYGPEADVWTAGVILYLLSGVPPFWAE  
TQQGIFDAVLKGYIDFESDPWPVIVSDSAKDLIRRLSSKPAERLTAHEVLRHPWICENGVPDRALDPAVLSRLKQFSAMNKLKLMALKLVIAESLSEEEI  
AGLREMFQAMDTDNSGAIITFDELKAGLRKYGSTLKDTEIHLMDAADVDNSGTIDYSEFIAATIHLNKLEREHLLVAAFQYFDKDGSGFITIDELQQACV  
EHGMADVLEEDIKEVDQNNDGKIDYGEFVEMMQGNAGVGRRTMRNSLNSMRDA  
>AT4G38230.2 | Symbols:CPK26,ATCPK26 | ARABIDOPSIS THALIANA CALCIUM-DEPENDENT PROTEIN KINASE  
26,calcium-dependent protein kinase 26 | Chr4:17928994-17931101 REVERSE LENGTH=514  
MGLALFSSDGKLIWKGSTQTKRRRQEEATMKHSGGNQACYVLGQKTPSIRDLYSLGHKLGQGGQFGTTYMCKEISTGREYACKSITRKLISKEDVEDV  
REIQIMHHLAGYKNIVTIKAYEDPLYVHIVMELCSGGELFDRIIQRGHYSERKAAELIKIIVGVVEACHSLGMHRDLKPFENFLVNKDDDFSLKAIDF  
GLSVFFKPGQIFEDVVGSPYYVAPEVLLKHYGPEADVWTAGVILYILVSGVPPFWAETQQGIFDAVLKGHIDFSDPWPLISDSAKNLIRGMLCSRPSER  
LTAHQVLRHPWICENGVPDRALDPAVLSRLKQFSAMNKLQMALRVIAESLSEEEIAGLKEMFKAMDTDNSGAIITFDELKAGLRRYGSTLKDTEIRDLM  
EAADIDKSGTIDYGEFIAATIHLNKLEREHLLSAFRYFDKDGSGYITIDELQHACAEQMSDVFLEDVIEKVDQNDGRIDYGEFVAMMQKGIIVGRTMR  
KSINMSIRNNAVSQ  
>AT5G04870.1 | Symbols:ATCPK1,CPK1 | calcium dependent protein kinase 1 | Chr5:1417015-1419877 REVERSE  
LENGTH=610  
MGNTCVGSPSRNGFLQSVSAAMWRPRDGDSDASMSNGDIASEAVSGELRSLSDEVNQKPPQVTPMPKPGTDVETKDRIRTESKPEETLEESLESKPKETK  
QETKSETKPEKPPPAKPKPKPKMKRVSSAGLRTESVLQKRTENFEKESYLSGRKLGQGGQFGTFLCVEKTGKFEACKSIAKRKLLTDEDVEDVREIQ  
IMHHLGHPNVISIKGAYEDVVAVHLMVMECCAGGELFDRIIQRGHYTERKAAELTRTIVGVVEACHSLGMHRDLKPFENFLVSKHEDSLLKTIDFGLSM  
FFKPDVFTDVGSPYYVAPEVLRKRYGPEADVWSAGVIVYLLSGVPPFWAETEQQGIFEVQLHGDLDFFSDPWPSISESAKDLVRKMLVRDPKRLTAH  
QVLCHPWVQDVGAPDKPLDSAVLSRMKQFSAMNFKKMLARVIAESLSEEEIAGLKEMFNMDADKSGQITFEELKAGLRVGANLKESEILDLMQAAD  
VDNSGTIDYKFEIAATLHLNKLIEREDHLFAAFTYFDKDGSGYITPDELQQACEEFGVEDVRIEELMRDQDNDGRIDYNEFVAMMQKGSITGGPVKMGL  
EKSFSIALKL  
>AT5G12180.1 | Symbols:CPK17 | calcium-dependent protein kinase 17 | Chr5:3937136-3939323 FORWARD  
LENGTH=528  
MGNCCSHGRDSADNGDALENGASASNAANSTGPTAEASVPQSKHAPPSPPPATKQGPVLPVLRPMEDVKASYSLGKELGRGQFGVTHLCTQKATGHQFA

CKTIAKRKLVNKEDIEDVRREVQIMHHLTGQPNIVELKGAIEDKHSVHLMELCAGGELFDRIIAKGHYSERAAASLLRTIVQIVHTCHSMGVIHRDLKP  
ENFLLLNKDNESPLKATDFGLSVFYKPGEVFKDIVGSAYYIAPEVLRRKYGPEADIWSIGVMYIILCGVPPFWAESENGIFNAILRGHVDFSSDPWPSI  
SPQAKDLVKKMLNSDPKQRLTAAQVLNHPWIKEDGEAPDVPLDNAVMSRLKQFKAMNNFKKVALRVIAGCLSEEEIMGLKEMFKGMDTDSGTTILEELR  
QGLAQGTRLSEYEVQQLMEAADADNGTIDYGEFIAATMHINRLDREEHLYSAFQHFDKDNSGYITMEELEQALREFGMNDGRDIKEIIEVDGDNDGR  
INYDEFVAMMRKGNPDPIPKRRELSFK  
>AT5G12480.1 | Symbols:CPK7 | calmodulin-domain protein kinase 7 | Chr5:4047817-4050035 REVERSE  
LENGTH=535  
MGNCCGNPSSATNQSKQKPKNKNPFYSNEYATDRSGAGFKLSVLKDPDTHDGLSLQYDLGREVGRGEGFITYLCTDKETGKEYACKSISKKKLRTAVD  
IEDVRREVEIMKHMHPKHPNVVSLKDSFEDDDAVHIVMELCEGELFDRIIVARGHYTERAAAAVMKTIVEVVQICHKQGMHRDLKPENFLFANKKETSAL  
KAIDFGLSVFFKPGEQFNEIVGSPYYMAPEVLRNRYGPEIDVWSAGVILYIILCGVPPFWAEQGVQAIIRSVIDFKRDPWPRVSDSAKDLVRKMLEP  
DPKKRLTAAQVLEHTWILNAKKAPNVS LGETVKARLKQFSVMNKLKRALRVIAEHLSSVEEAAGIKEAFEMMDVNKRGINLEELKYGLQKAGQQIADTD  
LQILMEATDVGDGTLNYSFVAVSVHLKMANDEHLHKAFFNFQDQNSGYIEIDELREALNDELNNTSSEEVIAAIMQDVDTDKDGRISYEEFVAMMKA  
GTDWRKASRQYSRERFNSLSLKLMDGSLQLEGET  
>AT5G19360.1 | Symbols:CPK34,AtCPK34 | calcium-dependent protein kinase 34 | Chr5:6521716-6523780  
REVERSE LENGTH=523  
MGNCCSHGRSDSDNKEEPRPENGGGVGAEEASVRASKHPPASPPATKQGPVLPGRPMEDVKSSYTLGKELGRGQFGVTHLCTQKATGLQFACKTIA  
KRKLVNKEDIEDVRREVQIMHHLTGQPNIVELKGAIEDKHSVHLMELCAGGELFDRIIAKGHYSERAAASLLRTIVQIHTCHSMGVIHRDLKPENFL  
LSKDENSPLKATDFGLSVFYKPGEVFKDIVGSAYYIAPEVLRNRYGPEADIWSIGVMYIILCGVPPFWAESENGIFNAILSGQVDFSSDPWVISPQAK  
DLVRKMLNSDPKQRLTAAQVLNHPWIKEDGEAPDVPLDNAVMSRLKQFKAMNNFKKVALRVIAGCLSEEEIMGLKEMFKGMDTDSGTTILEELRQGLAK  
QGTRLSEYEVQQLMEAADADNGTIDYGEFIAATMHINRLDREEHLYSAFQHFDKDNSGYITTEELEQALREFGMNDGRDIKEIIEVDGDNDGRINYEE  
FVAMMRKGNPDPNPKRRELSFK  
>AT5G19450.1 | Symbols:CPK8,CDPK19 | calcium-dependent protein kinase 19 | Chr5:6558672-6561471  
REVERSE LENGTH=533  
MGNCCASPGETGSKKPKIKSNPFYSEAYTTNGSGTGFKLSVLKDPDTHDGLSLMYDLGREVGRGEGFITYLCTDIKTGKEYACKSISKKKLRTAVDIE  
DVRREVEIMKHMHRHPNIVSLKDAFEDDDAVHIVMELCEGELFDRIIVARGHYTERAAAAVMKTILEVVQICHKHGMHRDLKPENFLFANKKETSALKA  
IDFGLSVFFKPGEGFNEIVGSPYYMAPEVLRNRYGPEVDIWSAGVILYIILCGVPPFWAEQGVQAIIRSVIDFKRDPWPRVSETAKDLVRKMLEPDP  
KKRLSAAQVLEHSWIQNAKKAPNVS LGETVKARLKQFSVMNKLKRALRVIAEHLSSVEEVAGIKEAFEMMDSKKTGKINLEELKFLGHLKLGQQQIPDIDL  
QILMEAADVDGDTLNYSFVAVSVHLKMANDEHLHKAFFNFQDQNSDYIEIEELREALNDEVDNTESEVVAAIMQDVDTDKDGRISYEEFAAMMKAGT  
DWRKASRQYSRERFNSLSLKLMDREGSLQLEGEN  
>AT5G23580.1 | Symbols:ATCDPK9,CPK12,CDPK9,ATCPK12 | calmodulin-like domain protein kinase  
9,ARABIDOPSIS THALIANA CALMODULIN-LIKE DOMAIN PROTEIN KINASE 9,CALCIUM-DEPENDENT PROTEIN KINASE 12 |  
Chr5:7950388-7952433 REVERSE LENGTH=490  
MANKPRTRWVLPYKTKNVEDNYFLGQVVGQFGTFLCTHKQTKLACKSIPKRKLLCQEDYDDVLRREIQIMHHLSEYPNVVRIESAYEDTKNVHLVM  
ELCEGELFDRIIVKRGHYSEERAAKLIKTIIVGVVEACHSLGVVHRDLKPENFLFSSDEDASLKSTDFGLSVFCTPGEAFSELVGSAYYVAPEVLHKKHYG  
PECDVWSAGVILYIILCGVPPFWAESEIGIFRKILQGKLEFEPNWPSSISAKDLIKMLESNPKRRLTAHQVLCVHPWVDDKVAPDKPLDCAVVSRLK  
KFSAMNKLKMLALRVIAERLSEEEIGGLKELFKMIDTDKSGTITFEELKDSMRVSGSELMESEIQELLRAADVDESGETIDYGEFLAATIHLNKLREENL  
VAASFDFDKDASGYITIEELQQAWEKFGINDSNLDEMIKIDIDQDNDGQIDYGEFVAMMRKNGTGGGIGRRTMRNSLNFGTTLDPESMNV
